# Supplementary material
Source: PubMed Central journal article supplement (PMC2742435)
Supplement: M900013-MCP200_1.pdf [file M900013-MCP200_1.pdf]

# Complementary Quantitative Proteomics Reveals that Transcription Factor AP-4 Mediates E-Box-Dependent Complex Formation for Transcriptional Repression of *HDM2*

## Contents of Supplementary Information

|                                                                                                                                                                                                                                                    |           |
|----------------------------------------------------------------------------------------------------------------------------------------------------------------------------------------------------------------------------------------------------|-----------|
| <b>Instruction for Supplementary Table 1</b> .....                                                                                                                                                                                                 | <b>2</b>  |
| <b>Supplementary Table 1</b> .....                                                                                                                                                                                                                 | <b>4</b>  |
| Detailed information regarding cICAT-labeled proteins (see Table 1) enriched on the <i>HDM2</i> -P2 E-box sequence (enrichment ratio $\geq 1.6$ ). Enriched proteins are arranged according to the functional classification indicated in Table 1. |           |
| <b>Instruction for Supplementary Table 2</b> .....                                                                                                                                                                                                 | <b>34</b> |
| <b>Supplementary Table 2</b> .....                                                                                                                                                                                                                 | <b>36</b> |
| Detailed information regarding iTRAQ-labeled proteins (see Table 1) enriched on the <i>HDM2</i> -P2 E-box sequence (enrichment ratio $\geq 1.6$ ). Enriched proteins are arranged according to the functional classification indicated in Table 1. |           |
| <b>Supplementary Figure 1</b> .....                                                                                                                                                                                                                | <b>56</b> |
| MS/MS spectra and assignment of peptides (shown in Table 1) identified by single peptide-based protein quantitation using cICAT labeling.                                                                                                          |           |
| <b>Supplementary Figure 2</b> .....                                                                                                                                                                                                                | <b>67</b> |
| MS/MS spectra and assignment of peptides (shown in Table 1) identified by single peptide-based protein quantitation using iTRAQ labeling.                                                                                                          |           |

## Instruction for Supplementary Table 1

The following information is instruction for the interpretation of protein and peptide ratios in Supplementary Table 1.

Each protein contains protein and peptide information as follows:

### **Protein-level Information:**

The protein description is shown at the first row. Detailed protein-level information is provided as follows:

1. **Accession No.:** Accession number in Swiss-Prot sequence database v54.2.
2. **Protein Score:** Mascot protein score.
3. **Ratio (L/H):** Raw ratio between proteins enriched by WT DNA-beads, or L (labeled by light cICAT reagent), and proteins enriched by MU DNA-beads, or H (labeled by heavy cICAT reagent). The value is a weighted average of the ratio of all quantitated peptides (see below).
4. **Normalized Ratio (L/H):** Normalized ratio of raw Ratio (L/H).
5. **STD:** standard deviation of normalized ratio.
6. **Mass:** Molecular weight (Da) of the protein.
7. **Sequence Coverage (%):** The number of amino acids spanned by the assigned peptides divided by the sequence length.
8. **Identified Peptide:** The number of peptides assigned to the protein by Mascot. Multiple matches to peptides with the same primary sequence count separately.
9. **Quantitated Peptide:** The number of identified peptides for ratio quantitation.
10. **Identified Unique Peptide:** The number of peptides assigned to the protein by Mascot. Multiple matches to peptides with the same primary sequence count as one.

### **Peptide-level Information:**

Peptide-level information contains detailed information for identified peptides assigned to the protein as follows:

1. **Spectrum No.:** The index number of MS/MS spectrum for Mascot search.
2. **Peptide Score:** Mascot Peptide Score.
3. **Ratio (L/H):** Raw ratio of peptide pair from light (L) cICAT labeled peptide (represents proteins enriched by WT DNA-beads) and heavy (H) cICAT labeled peptide (represents proteins enriched by MU DNA-beads).
4. **Normalized Ratio (L/H):** Normalized ratio of raw peptide ratio (L/H).
5. **Precursor  $m/z$  (Da):** The precursor ion selected for MS/MS analysis.

6. **Charge:** The charge state of precursor ion.
7. **Mass Error (Da):** The value of observed peptide mass minus expected peptide mass.
8. **Peptide Sequence:** The peptide sequence of matched peptide.
9. **Modification:** Observed modification of the peptide.
10. **Labeled:** The value is “Yes” if the peptide is labeled with cICAT reagents.
11. **Unique:** The value is “Yes” if the peptide is a non-degenerate peptide.

## Supplementary Table 1

### bHLH Transcription Factors

#### Transcription factor AP-4 - Homo sapiens (Human)

| Accession No. | Protein Score | Ratio(L/H) | Normalized Ratio (L/H) | STD                       | Mass   | Sequence Coverage (%) | Identified Peptide       | Quantitated Peptide | Identified Unique Peptide |        |
|---------------|---------------|------------|------------------------|---------------------------|--------|-----------------------|--------------------------|---------------------|---------------------------|--------|
| Q01664        | 59            | 2.37       | 1.96                   | 0.07                      | 38702  | 8.0                   | 3                        | 2                   | 2                         |        |
| Spectrum No.  | Peptide Score | Ratio(L/H) | Normalized Ratio (L/H) | Precursor <i>m/z</i> (Da) | Charge | Mass Error (Da)       | Peptide Sequence         | Modification        | Labeled                   | Unique |
| 51341         | 33.38         | 2.34       | 1.93                   | 902.4012                  | 3      | -0.27                 | TEKEVIGGLCSLANIPLTPETQR  | ICAT-C:13C(9) (C)   | YES                       | YES    |
| 54132         | 31.56         | 2.44       | 2.01                   | 956.1966                  | 3      | 0.1025                | EVIGGLCSLANIPLTPETQRDQER | ICAT-C (C)          | YES                       | YES    |
| 54139         | 30.47         | N/A        | N/A                    | 956.2158                  | 3      | 0.1601                | EVIGGLCSLANIPLTPETQRDQER | ICAT-C (C)          | YES                       | YES    |

#### Circadian locomoter output cycles protein kaput - Homo sapiens (Human)

| Accession No. | Protein Score | Ratio(L/H) | Normalized Ratio (L/H) | STD                       | Mass   | Sequence Coverage (%) | Identified Peptide | Quantitated Peptide       | Identified Unique Peptide |        |
|---------------|---------------|------------|------------------------|---------------------------|--------|-----------------------|--------------------|---------------------------|---------------------------|--------|
| O15516        | 64            | 2.47       | 2.04                   | N/A                       | 95244  | 1.8                   | 1                  | 1                         | 1                         |        |
| Spectrum No.  | Peptide Score | Ratio(L/H) | Normalized Ratio (L/H) | Precursor <i>m/z</i> (Da) | Charge | Mass Error (Da)       | Peptide Sequence   | Modification              | Labeled                   | Unique |
| 35628         | 63.57         | 2.47       | 2.04                   | 1022.4034                 | 2      | -0.0638               | EMCTVEEPNEEFTSR    | ICAT-C (C); Oxidation (M) | YES                       | YES    |

### Transcription factors

#### Nuclear factor of activated T-cells, cytoplasmic 2 - Homo sapiens (Human)

| Accession No. | Protein Score | Ratio(L/H) | Normalized Ratio (L/H) | STD                       | Mass   | Sequence Coverage (%) | Identified Peptide | Quantitated Peptide | Identified Unique Peptide |        |
|---------------|---------------|------------|------------------------|---------------------------|--------|-----------------------|--------------------|---------------------|---------------------------|--------|
| Q13469        | 65            | 7.82       | 6.46                   | 2.10                      | 100083 | 6.7                   | 8                  | 2                   | 2                         |        |
| Spectrum No.  | Peptide Score | Ratio(L/H) | Normalized Ratio (L/H) | Precursor <i>m/z</i> (Da) | Charge | Mass Error (Da)       | Peptide Sequence   | Modification        | Labeled                   | Unique |
| 7458          | 31.39         | N/A        | N/A                    | 616.2552                  | 2      | -0.1683               | ATIDCAGILK         | ICAT-C (C)          | YES                       | YES    |
| 33429         | 35.87         | N/A        | N/A                    | 986.8950                  | 2      | -0.2294               | IVSLQTASNPIECSQR   | ICAT-C (C)          | YES                       | NO     |
| 33430         | 29.99         | 7.04       | 5.82                   | 986.8992                  | 2      | -0.2210               | IVSLQTASNPIECSQR   | ICAT-C (C)          | YES                       | YES    |
| 33432         | 30.81         | N/A        | N/A                    | 986.9060                  | 2      | -0.2073               | IVSLQTASNPIECSQR   | ICAT-C (C)          | YES                       | YES    |
| 33445         | 39.8          | N/A        | N/A                    | 986.9597                  | 2      | -0.0999               | IVSLQTASNPIECSQR   | ICAT-C (C)          | YES                       | NO     |
| 33447         | 33.09         | N/A        | N/A                    | 986.9780                  | 2      | -0.0632               | IVSLQTASNPIECSQR   | ICAT-C (C)          | YES                       | NO     |
| 35142         | 25.22         | N/A        | N/A                    | 677.7010                  | 3      | 0.0446                | HSCAEALVALPPGASPQR | ICAT-C (C)          | YES                       | YES    |
| 44025         | 28.93         | 10.01      | 8.27                   | 776.7252                  | 3      | 0.0057                | HIYPAVEFLGPCEQGERR | ICAT-C (C)          | YES                       | YES    |

#### Alpha-globin transcription factor CP2 - Homo sapiens (Human)

| Accession No. | Protein Score | Ratio(L/H) | Normalized Ratio (L/H) | STD  | Mass  | Sequence Coverage (%) | Identified Peptide | Quantitated Peptide | Identified Unique Peptide |
|---------------|---------------|------------|------------------------|------|-------|-----------------------|--------------------|---------------------|---------------------------|
| Q12800        | 1019          | 4.01       | 3.32                   | 1.58 | 57220 | 12.7                  | 56                 | 32                  | 4                         |

| Spectrum No. | Peptide Score | Ratio(L/H) | Normalized Ratio (L/H) | Precursor m/z (Da) | Charge | Mass Error (Da) | Peptide Sequence   | Modification      | Labeled | Unique |
|--------------|---------------|------------|------------------------|--------------------|--------|-----------------|--------------------|-------------------|---------|--------|
| 24592        | 53.74         | N/A        | N/A                    | 849.8016           | 2      | -0.2520         | DDVIQICGPADGIR     | ICAT-C (C)        | YES     | NO     |
| 24593        | 51.97         | N/A        | N/A                    | 849.8136           | 2      | -0.2281         | DDVIQICGPADGIR     | ICAT-C (C)        | YES     | NO     |
| 24596        | 62.52         | N/A        | N/A                    | 849.8268           | 2      | -0.2017         | DDVIQICGPADGIR     | ICAT-C (C)        | YES     | NO     |
| 24597        | 74.79         | N/A        | N/A                    | 849.8286           | 2      | -0.1981         | DDVIQICGPADGIR     | ICAT-C (C)        | YES     | NO     |
| 24598        | 26.4          | N/A        | N/A                    | 849.8398           | 2      | -0.1756         | DDVIQICGPADGIR     | ICAT-C (C)        | YES     | NO     |
| 24599        | 53.06         | N/A        | N/A                    | 849.8430           | 2      | -0.1691         | DDVIQICGPADGIR     | ICAT-C (C)        | YES     | NO     |
| 24602        | 63.27         | N/A        | N/A                    | 849.8728           | 2      | -0.1097         | DDVIQICGPADGIR     | ICAT-C (C)        | YES     | NO     |
| 24603        | 44.25         | N/A        | N/A                    | 849.8730           | 2      | -0.1092         | DDVIQICGPADGIR     | ICAT-C (C)        | YES     | NO     |
| 24604        | 56.79         | N/A        | N/A                    | 849.8745           | 2      | -0.1062         | DDVIQICGPADGIR     | ICAT-C (C)        | YES     | NO     |
| 24605        | 48.33         | N/A        | N/A                    | 849.8895           | 2      | -0.0761         | DDVIQICGPADGIR     | ICAT-C (C)        | YES     | NO     |
| 24606        | 62.77         | N/A        | N/A                    | 849.8915           | 2      | -0.0723         | DDVIQICGPADGIR     | ICAT-C (C)        | YES     | NO     |
| 24609        | 33.45         | N/A        | N/A                    | 849.9026           | 2      | -0.0500         | DDVIQICGPADGIR     | ICAT-C (C)        | YES     | NO     |
| 24615        | 54.52         | N/A        | N/A                    | 849.9968           | 2      | 0.1384          | DDVIQICGPADGIR     | ICAT-C (C)        | YES     | NO     |
| 24618        | 67.33         | N/A        | N/A                    | 850.0995           | 2      | 0.3437          | DDVIQICGPADGIR     | ICAT-C (C)        | YES     | NO     |
| 24890        | 36.7          | N/A        | N/A                    | 854.3255           | 2      | -0.2345         | DDVIQICGPADGIR     | ICAT-C:13C(9) (C) | YES     | NO     |
| 24894        | 57.52         | N/A        | N/A                    | 854.3366           | 2      | -0.2122         | DDVIQICGPADGIR     | ICAT-C:13C(9) (C) | YES     | NO     |
| 24895        | 52.97         | N/A        | N/A                    | 854.3384           | 2      | -0.2086         | DDVIQICGPADGIR     | ICAT-C:13C(9) (C) | YES     | NO     |
| 24899        | 47.16         | N/A        | N/A                    | 854.3810           | 2      | -0.1233         | DDVIQICGPADGIR     | ICAT-C:13C(9) (C) | YES     | NO     |
| 24900        | 35.81         | N/A        | N/A                    | 854.3884           | 2      | -0.1086         | DDVIQICGPADGIR     | ICAT-C:13C(9) (C) | YES     | NO     |
| 24901        | 53.05         | N/A        | N/A                    | 854.3919           | 2      | -0.1016         | DDVIQICGPADGIR     | ICAT-C:13C(9) (C) | YES     | NO     |
| 24907        | 51.42         | N/A        | N/A                    | 854.4010           | 2      | -0.0834         | DDVIQICGPADGIR     | ICAT-C:13C(9) (C) | YES     | NO     |
| 24922        | 35.98         | N/A        | N/A                    | 854.5010           | 2      | 0.1166          | DDVIQICGPADGIR     | ICAT-C:13C(9) (C) | YES     | NO     |
| 27383        | 27.04         | 3.55       | 2.93                   | 896.8951           | 2      | -0.1797         | LTIYVCQESLQLR      | ICAT-C (C)        | YES     | YES    |
| 27387        | 35.89         | 2.84       | 2.35                   | 896.9276           | 2      | -0.1147         | LTIYVCQESLQLR      | ICAT-C (C)        | YES     | YES    |
| 27391        | 46.96         | 4.02       | 3.32                   | 896.9391           | 2      | -0.0916         | LTIYVCQESLQLR      | ICAT-C (C)        | YES     | YES    |
| 27392        | 28.22         | 2.86       | 2.36                   | 896.9440           | 2      | -0.0819         | LTIYVCQESLQLR      | ICAT-C (C)        | YES     | YES    |
| 27714        | 40.15         | 2.80       | 2.31                   | 901.4402           | 2      | -0.1197         | LTIYVCQESLQLR      | ICAT-C:13C(9) (C) | YES     | YES    |
| 27718        | 45.96         | 3.92       | 3.24                   | 901.4422           | 2      | -0.1157         | LTIYVCQESLQLR      | ICAT-C:13C(9) (C) | YES     | YES    |
| 35760        | 39.1          | 5.21       | 4.30                   | 1024.4321          | 2      | -0.2679         | ILPFQYVLC AATSPAVK | ICAT-C (C)        | YES     | YES    |
| 35761        | 53.7          | 5.24       | 4.33                   | 1024.4361          | 2      | -0.2599         | ILPFQYVLC AATSPAVK | ICAT-C (C)        | YES     | YES    |
| 35767        | 43.31         | 9.89       | 8.17                   | 1024.4617          | 2      | -0.2088         | ILPFQYVLC AATSPAVK | ICAT-C (C)        | YES     | YES    |
| 35790        | 39.41         | 6.09       | 5.03                   | 1024.5141          | 2      | -0.1040         | ILPFQYVLC AATSPAVK | ICAT-C (C)        | YES     | YES    |
| 35797        | 28.42         | 8.22       | 6.79                   | 1024.5245          | 2      | -0.0831         | ILPFQYVLC AATSPAVK | ICAT-C (C)        | YES     | YES    |
| 35814        | 70.08         | 5.01       | 4.14                   | 1024.8000          | 2      | 0.4678          | ILPFQYVLC AATSPAVK | ICAT-C (C)        | YES     | YES    |
| 35815        | 50.55         | 5.60       | 4.62                   | 1024.8000          | 2      | 0.4678          | ILPFQYVLC AATSPAVK | ICAT-C (C)        | YES     | YES    |
| 35823        | 46.67         | 5.28       | 4.36                   | 1024.9000          | 2      | 0.6678          | ILPFQYVLC AATSPAVK | ICAT-C (C)        | YES     | YES    |
| 36111        | 28.24         | 5.32       | 4.39                   | 1028.9575          | 2      | -0.2473         | ILPFQYVLC AATSPAVK | ICAT-C:13C(9) (C) | YES     | YES    |
| 36139        | 27.32         | 6.19       | 5.12                   | 1029.0244          | 2      | -0.1135         | ILPFQYVLC AATSPAVK | ICAT-C:13C(9) (C) | YES     | YES    |
| 36681        | 26.8          | N/A        | N/A                    | 690.3406           | 3      | -0.0736         | LTRDDVIQICGPADGIR  | ICAT-C (C)        | YES     | YES    |

|       |       |      |      |           |   |         |                   |                   |     |     |
|-------|-------|------|------|-----------|---|---------|-------------------|-------------------|-----|-----|
| 36688 | 50.04 | 3.02 | 2.49 | 690.3587  | 3 | -0.0193 | LTRDDVIQICGPADGIR | ICAT-C (C)        | YES | YES |
| 36691 | 50.98 | 4.06 | 3.36 | 690.3627  | 3 | -0.0073 | LTRDDVIQICGPADGIR | ICAT-C (C)        | YES | YES |
| 36692 | 43.96 | 3.48 | 2.88 | 690.3633  | 3 | -0.0053 | LTRDDVIQICGPADGIR | ICAT-C (C)        | YES | YES |
| 36693 | 38.98 | N/A  | N/A  | 690.3639  | 3 | -0.0035 | LTRDDVIQICGPADGIR | ICAT-C (C)        | YES | YES |
| 36697 | 33.97 | 4.20 | 3.47 | 690.3696  | 3 | 0.0133  | LTRDDVIQICGPADGIR | ICAT-C (C)        | YES | YES |
| 36702 | 38.6  | 3.22 | 2.66 | 690.3815  | 3 | 0.0491  | LTRDDVIQICGPADGIR | ICAT-C (C)        | YES | YES |
| 36703 | 27.16 | 4.65 | 3.84 | 690.3842  | 3 | 0.0571  | LTRDDVIQICGPADGIR | ICAT-C (C)        | YES | YES |
| 36708 | 41.04 | 3.00 | 2.48 | 690.4493  | 3 | 0.2526  | LTRDDVIQICGPADGIR | ICAT-C (C)        | YES | YES |
| 36709 | 41.13 | 4.24 | 3.50 | 690.4585  | 3 | 0.2802  | LTRDDVIQICGPADGIR | ICAT-C (C)        | YES | YES |
| 37022 | 34.25 | 3.62 | 2.99 | 693.3706  | 3 | -0.0137 | LTRDDVIQICGPADGIR | ICAT-C:13C(9) (C) | YES | YES |
| 37030 | 38.05 | 4.04 | 3.34 | 693.3862  | 3 | 0.0331  | LTRDDVIQICGPADGIR | ICAT-C:13C(9) (C) | YES | YES |
| 37031 | 27.81 | 3.01 | 2.49 | 693.3868  | 3 | 0.0347  | LTRDDVIQICGPADGIR | ICAT-C:13C(9) (C) | YES | YES |
| 37032 | 25.14 | 2.74 | 2.26 | 693.3898  | 3 | 0.0438  | LTRDDVIQICGPADGIR | ICAT-C:13C(9) (C) | YES | YES |
| 37035 | 33.27 | 3.17 | 2.62 | 693.4460  | 3 | 0.2125  | LTRDDVIQICGPADGIR | ICAT-C:13C(9) (C) | YES | YES |
| 37037 | 32.67 | 4.28 | 3.53 | 693.4606  | 3 | 0.2563  | LTRDDVIQICGPADGIR | ICAT-C:13C(9) (C) | YES | YES |
| 40092 | 32.77 | 3.79 | 3.13 | 1083.4677 | 2 | -0.2346 | IAQLFSISPCQISQIYK | ICAT-C (C)        | YES | YES |
| 40119 | 39.24 | 4.31 | 3.56 | 1083.9000 | 2 | 0.6300  | IAQLFSISPCQISQIYK | ICAT-C (C)        | YES | YES |

### General transcription factor II-I - Homo sapiens (Human)

| Accession No. | Protein Score | Ratio(L/H) | Normalized Ratio (L/H) | STD                | Mass   | Sequence Coverage (%) | Identified Peptide    | Quantitated Peptide       | Identified Unique Peptide |        |
|---------------|---------------|------------|------------------------|--------------------|--------|-----------------------|-----------------------|---------------------------|---------------------------|--------|
| P78347        | 141           | 3.81       | 3.15                   | 0.82               | 112346 | 4.9                   | 9                     | 3                         | 2                         |        |
| Spectrum No.  | Peptide Score | Ratio(L/H) | Normalized Ratio (L/H) | Precursor m/z (Da) | Charge | Mass Error (Da)       | Peptide Sequence      | Modification              | Labeled                   | Unique |
| 3521          | 31.42         | N/A        | N/A                    | 509.2045           | 2      | -0.1379               | CGEALGLK              | ICAT-C (C)                | YES                       | YES    |
| 15664         | 25.5          | N/A        | N/A                    | 721.7855           | 2      | -0.2034               | SILSPGGSCGPIK         | ICAT-C (C)                | YES                       | YES    |
| 15666         | 53.65         | N/A        | N/A                    | 721.7917           | 2      | -0.1911               | SILSPGGSCGPIK         | ICAT-C (C)                | YES                       | YES    |
| 15671         | 46.66         | N/A        | N/A                    | 721.8449           | 2      | -0.0847               | SILSPGGSCGPIK         | ICAT-C (C)                | YES                       | YES    |
| 15674         | 50.04         | N/A        | N/A                    | 721.8538           | 2      | -0.0669               | SILSPGGSCGPIK         | ICAT-C (C)                | YES                       | YES    |
| 15675         | 61.03         | N/A        | N/A                    | 721.8656           | 2      | -0.0432               | SILSPGGSCGPIK         | ICAT-C (C)                | YES                       | YES    |
| 42955         | 29.12         | 5.10       | 4.21                   | 758.3438           | 3      | -0.1501               | ITINPGCVVVDGMPPGVSEFK | ICAT-C (C); Oxidation (M) | YES                       | YES    |
| 44053         | 29.77         | 3.86       | 3.19                   | 777.3068           | 3      | -0.2784               | VMVTDADRSILSPGGSCGPIK | ICAT-C (C)                | YES                       | YES    |
| 44328         | 26.35         | 3.55       | 2.93                   | 782.7635           | 3      | 0.0966                | VMVTDADRSILSPGGSCGPIK | ICAT-C (C); Oxidation (M) | YES                       | YES    |

### Upstream-binding protein 1 - Homo sapiens (Human)

| Accession No. | Protein Score | Ratio(L/H) | Normalized Ratio (L/H) | STD                | Mass   | Sequence Coverage (%) | Identified Peptide | Quantitated Peptide | Identified Unique Peptide |        |
|---------------|---------------|------------|------------------------|--------------------|--------|-----------------------|--------------------|---------------------|---------------------------|--------|
| Q9NZI7        | 903           | 3.27       | 2.70                   | 0.45               | 60453  | 7.6                   | 45                 | 40                  | 4                         |        |
| Spectrum No.  | Peptide Score | Ratio(L/H) | Normalized Ratio (L/H) | Precursor m/z (Da) | Charge | Mass Error (Da)       | Peptide Sequence   | Modification        | Labeled                   | Unique |
| 4550          | 28.35         | 3.59       | 2.97                   | 547.7435           | 2      | -0.1229               | LTIYVCR            | ICAT-C (C)          | YES                       | YES    |
| 24183         | 48.18         | N/A        | N/A                    | 843.8274           | 2      | -0.2004               | EDLVQICGAADGIR     | ICAT-C (C)          | YES                       | YES    |

|       |       |      |      |          |   |         |                   |                   |     |     |
|-------|-------|------|------|----------|---|---------|-------------------|-------------------|-----|-----|
| 24184 | 58.39 | 3.20 | 2.64 | 843.8419 | 2 | -0.1715 | EDLVQICGAADGIR    | ICAT-C (C)        | YES | YES |
| 24186 | 50.57 | N/A  | N/A  | 843.8783 | 2 | -0.0986 | EDLVQICGAADGIR    | ICAT-C (C)        | YES | YES |
| 24191 | 65.52 | N/A  | N/A  | 843.8894 | 2 | -0.0764 | EDLVQICGAADGIR    | ICAT-C (C)        | YES | YES |
| 24192 | 74.86 | 2.93 | 2.42 | 843.9062 | 2 | -0.0428 | EDLVQICGAADGIR    | ICAT-C (C)        | YES | YES |
| 24489 | 34.46 | 3.79 | 3.13 | 848.3862 | 2 | -0.1131 | EDLVQICGAADGIR    | ICAT-C:13C(9) (C) | YES | YES |
| 24502 | 45.76 | 3.12 | 2.58 | 848.4256 | 2 | -0.0342 | EDLVQICGAADGIR    | ICAT-C:13C(9) (C) | YES | YES |
| 35045 | 44.01 | 3.23 | 2.67 | 677.0224 | 3 | -0.0220 | LTKEDLVQICGAADGIR | ICAT-C (C)        | YES | YES |
| 35047 | 57.97 | 3.26 | 2.70 | 677.0248 | 3 | -0.0147 | LTKEDLVQICGAADGIR | ICAT-C (C)        | YES | YES |
| 35049 | 49.53 | 3.46 | 2.86 | 677.0260 | 3 | -0.0112 | LTKEDLVQICGAADGIR | ICAT-C (C)        | YES | YES |
| 35053 | 38.2  | 3.74 | 3.09 | 677.0298 | 3 | 0.0003  | LTKEDLVQICGAADGIR | ICAT-C (C)        | YES | YES |
| 35055 | 43.89 | 3.26 | 2.69 | 677.0329 | 3 | 0.0095  | LTKEDLVQICGAADGIR | ICAT-C (C)        | YES | YES |
| 35067 | 44.45 | N/A  | N/A  | 677.0407 | 3 | 0.0329  | LTKEDLVQICGAADGIR | ICAT-C (C)        | YES | YES |
| 35069 | 33.09 | 3.71 | 3.06 | 677.0433 | 3 | 0.0406  | LTKEDLVQICGAADGIR | ICAT-C (C)        | YES | YES |
| 35071 | 40.41 | 3.04 | 2.51 | 677.0440 | 3 | 0.0428  | LTKEDLVQICGAADGIR | ICAT-C (C)        | YES | YES |
| 35073 | 43.85 | 4.09 | 3.38 | 677.0457 | 3 | 0.0478  | LTKEDLVQICGAADGIR | ICAT-C (C)        | YES | YES |
| 35075 | 42.17 | 3.32 | 2.75 | 677.0480 | 3 | 0.0547  | LTKEDLVQICGAADGIR | ICAT-C (C)        | YES | YES |
| 35079 | 25.85 | 3.03 | 2.50 | 677.1156 | 3 | 0.2575  | LTKEDLVQICGAADGIR | ICAT-C (C)        | YES | YES |
| 35360 | 33.41 | 3.28 | 2.71 | 680.0287 | 3 | -0.0333 | LTKEDLVQICGAADGIR | ICAT-C:13C(9) (C) | YES | YES |
| 35365 | 40.65 | 3.24 | 2.68 | 680.0329 | 3 | -0.0207 | LTKEDLVQICGAADGIR | ICAT-C:13C(9) (C) | YES | YES |
| 35374 | 36.55 | 3.22 | 2.66 | 680.0367 | 3 | -0.0092 | LTKEDLVQICGAADGIR | ICAT-C:13C(9) (C) | YES | YES |
| 35376 | 39.33 | 3.25 | 2.68 | 680.0388 | 3 | -0.0031 | LTKEDLVQICGAADGIR | ICAT-C:13C(9) (C) | YES | YES |
| 35390 | 34.18 | 3.09 | 2.55 | 680.0579 | 3 | 0.0542  | LTKEDLVQICGAADGIR | ICAT-C:13C(9) (C) | YES | YES |
| 35395 | 26.02 | 3.09 | 2.56 | 680.1169 | 3 | 0.2312  | LTKEDLVQICGAADGIR | ICAT-C:13C(9) (C) | YES | YES |
| 40028 | 44.85 | 3.42 | 2.83 | 721.9427 | 3 | -0.2721 | TSAFIQVHCISTEFTPR | ICAT-C (C)        | YES | YES |
| 40029 | 45.58 | 3.59 | 2.96 | 721.9478 | 3 | -0.2569 | TSAFIQVHCISTEFTPR | ICAT-C (C)        | YES | YES |
| 40030 | 28.25 | 4.10 | 3.38 | 721.9511 | 3 | -0.2469 | TSAFIQVHCISTEFTPR | ICAT-C (C)        | YES | YES |
| 40033 | 34.09 | N/A  | N/A  | 721.9982 | 3 | -0.1054 | TSAFIQVHCISTEFTPR | ICAT-C (C)        | YES | YES |
| 40040 | 43.69 | 3.41 | 2.81 | 722.0300 | 3 | -0.0102 | TSAFIQVHCISTEFTPR | ICAT-C (C)        | YES | YES |
| 40042 | 28.16 | 3.04 | 2.51 | 722.0345 | 3 | 0.0035  | TSAFIQVHCISTEFTPR | ICAT-C (C)        | YES | YES |
| 40043 | 32.99 | 3.09 | 2.55 | 722.0349 | 3 | 0.0045  | TSAFIQVHCISTEFTPR | ICAT-C (C)        | YES | YES |
| 40044 | 36.96 | 3.42 | 2.82 | 722.0350 | 3 | 0.0050  | TSAFIQVHCISTEFTPR | ICAT-C (C)        | YES | YES |
| 40048 | 55.13 | 5.61 | 4.63 | 722.0521 | 3 | 0.0561  | TSAFIQVHCISTEFTPR | ICAT-C (C)        | YES | YES |
| 40050 | 43.77 | 3.23 | 2.67 | 722.0529 | 3 | 0.0587  | TSAFIQVHCISTEFTPR | ICAT-C (C)        | YES | YES |
| 40051 | 33.09 | 3.26 | 2.69 | 722.0566 | 3 | 0.0695  | TSAFIQVHCISTEFTPR | ICAT-C (C)        | YES | YES |
| 40053 | 34.55 | 3.74 | 3.09 | 722.0623 | 3 | 0.0868  | TSAFIQVHCISTEFTPR | ICAT-C (C)        | YES | YES |
| 40054 | 44.1  | 3.34 | 2.76 | 722.0625 | 3 | 0.0874  | TSAFIQVHCISTEFTPR | ICAT-C (C)        | YES | YES |
| 40055 | 59.28 | 3.25 | 2.69 | 722.0665 | 3 | 0.0993  | TSAFIQVHCISTEFTPR | ICAT-C (C)        | YES | YES |
| 40061 | 53.85 | 3.33 | 2.75 | 722.2000 | 3 | 0.4999  | TSAFIQVHCISTEFTPR | ICAT-C (C)        | YES | YES |
| 40062 | 42.74 | 3.25 | 2.68 | 722.2000 | 3 | 0.4999  | TSAFIQVHCISTEFTPR | ICAT-C (C)        | YES | YES |
| 40287 | 34.97 | 3.36 | 2.77 | 725.0363 | 3 | -0.0215 | TSAFIQVHCISTEFTPR | ICAT-C:13C(9) (C) | YES | YES |
| 40288 | 27.53 | 3.11 | 2.57 | 725.0435 | 3 | 0.0001  | TSAFIQVHCISTEFTPR | ICAT-C:13C(9) (C) | YES | YES |
| 40292 | 26.99 | 3.24 | 2.67 | 725.0545 | 3 | 0.0333  | TSAFIQVHCISTEFTPR | ICAT-C:13C(9) (C) | YES | YES |
| 40296 | 30.55 | 3.21 | 2.65 | 725.0665 | 3 | 0.0693  | TSAFIQVHCISTEFTPR | ICAT-C:13C(9) (C) | YES | YES |

**COUP transcription factor 1 - Homo sapiens (Human)**

| Accession No. | Protein Score | Ratio(L/H) | Normalized Ratio (L/H) | STD                       | Mass   | Sequence Coverage (%) | Identified Peptide       | Quantitated Peptide           | Identified Unique Peptide |        |
|---------------|---------------|------------|------------------------|---------------------------|--------|-----------------------|--------------------------|-------------------------------|---------------------------|--------|
| P10589        | 316           | 2.69       | 2.22                   | 2.13                      | 46126  | 15.6                  | 18                       | 5                             | 2                         |        |
| Spectrum No.  | Peptide Score | Ratio(L/H) | Normalized Ratio (L/H) | Precursor <i>m/z</i> (Da) | Charge | Mass Error (Da)       | Peptide Sequence         | Modification                  | Labeled                   | Unique |
| 10675         | 25.38         | N/A        | N/A                    | 673.9053                  | 2      | 0.1651                | NCPIDQHHR                | ICAT-C (C)                    | YES                       | NO     |
| 14604         | 48.3          | N/A        | N/A                    | 712.7716                  | 2      | -0.1479               | SQCALEEYVR               | ICAT-C (C)                    | YES                       | NO     |
| 14605         | 33.62         | N/A        | N/A                    | 712.7728                  | 2      | -0.1455               | SQCALEEYVR               | ICAT-C (C)                    | YES                       | NO     |
| 14607         | 40.56         | N/A        | N/A                    | 712.7786                  | 2      | -0.1339               | SQCALEEYVR               | ICAT-C (C)                    | YES                       | NO     |
| 14613         | 33.59         | N/A        | N/A                    | 712.8306                  | 2      | -0.0299               | SQCALEEYVR               | ICAT-C (C)                    | YES                       | NO     |
| 14615         | 37.84         | N/A        | N/A                    | 712.8387                  | 2      | -0.0137               | SQCALEEYVR               | ICAT-C (C)                    | YES                       | NO     |
| 14619         | 36.06         | N/A        | N/A                    | 712.8552                  | 2      | 0.0193                | SQCALEEYVR               | ICAT-C (C)                    | YES                       | NO     |
| 14620         | 48.12         | N/A        | N/A                    | 712.8694                  | 2      | 0.0476                | SQCALEEYVR               | ICAT-C (C)                    | YES                       | NO     |
| 14625         | 49.89         | N/A        | N/A                    | 712.9309                  | 2      | 0.1708                | SQCALEEYVR               | ICAT-C (C)                    | YES                       | NO     |
| 15056         | 28.03         | N/A        | N/A                    | 717.2904                  | 2      | -0.1404               | SQCALEEYVR               | ICAT-C:13C(9) (C)             | YES                       | NO     |
| 15080         | 32.58         | N/A        | N/A                    | 717.3628                  | 2      | 0.0043                | SQCALEEYVR               | ICAT-C:13C(9) (C)             | YES                       | NO     |
| 15100         | 35.35         | N/A        | N/A                    | 717.4346                  | 2      | 0.1479                | SQCALEEYVR               | ICAT-C:13C(9) (C)             | YES                       | NO     |
| 52010         | 26.9          | 7.37       | 6.09                   | 915.6923                  | 3      | -0.3139               | AIVLFTSDACGLSDAAHIESLQEK | ICAT-C (C)                    | YES                       | YES    |
| 52016         | 56.4          | 2.44       | 2.01                   | 915.7575                  | 3      | -0.1182               | AIVLFTSDACGLSDAAHIESLQEK | ICAT-C (C)                    | YES                       | YES    |
| 52023         | 48.54         | 2.91       | 2.41                   | 915.8335                  | 3      | 0.1096                | AIVLFTSDACGLSDAAHIESLQEK | ICAT-C (C)                    | YES                       | YES    |
| 52132         | 33.85         | 2.55       | 2.11                   | 918.7587                  | 3      | -0.1449               | AIVLFTSDACGLSDAAHIESLQEK | ICAT-C:13C(9) (C)             | YES                       | YES    |
| 56773         | 34.96         | 2.61       | 2.15                   | 1014.3642                 | 3      | -0.3168               | YGSQCMQPNNIMGIENICELAAR  | 2 ICAT-C (C); 2 Oxidation (M) | YES                       | YES    |
| 56774         | 40.32         | N/A        | N/A                    | 1014.3977                 | 3      | -0.2162               | YGSQCMQPNNIMGIENICELAAR  | 2 ICAT-C (C); 2 Oxidation (M) | YES                       | YES    |

### COUP transcription factor 2 - Homo sapiens (Human)

| Accession No. | Protein Score | Ratio(L/H) | Normalized Ratio (L/H) | STD                       | Mass   | Sequence Coverage (%) | Identified Peptide       | Quantitated Peptide | Identified Unique Peptide |        |
|---------------|---------------|------------|------------------------|---------------------------|--------|-----------------------|--------------------------|---------------------|---------------------------|--------|
| P24468        | 228           | 2.16       | 1.78                   | 0.05                      | 45542  | 10.4                  | 14                       | 2                   | 1                         |        |
| Spectrum No.  | Peptide Score | Ratio(L/H) | Normalized Ratio (L/H) | Precursor <i>m/z</i> (Da) | Charge | Mass Error (Da)       | Peptide Sequence         | Modification        | Labeled                   | Unique |
| 10675         | 25.38         | N/A        | N/A                    | 673.9053                  | 2      | 0.1651                | NCPIDQHHR                | ICAT-C (C)          | YES                       | NO     |
| 15056         | 28.03         | N/A        | N/A                    | 712.7716                  | 2      | -0.1479               | SQCALEEYVR               | ICAT-C:13C(9) (C)   | YES                       | NO     |
| 15080         | 32.58         | N/A        | N/A                    | 712.7728                  | 2      | -0.1455               | SQCALEEYVR               | ICAT-C:13C(9) (C)   | YES                       | NO     |
| 14613         | 33.59         | N/A        | N/A                    | 712.7786                  | 2      | -0.1339               | SQCALEEYVR               | ICAT-C (C)          | YES                       | NO     |
| 14605         | 33.62         | N/A        | N/A                    | 712.8306                  | 2      | -0.0299               | SQCALEEYVR               | ICAT-C (C)          | YES                       | NO     |
| 15100         | 35.35         | N/A        | N/A                    | 712.8387                  | 2      | -0.0137               | SQCALEEYVR               | ICAT-C:13C(9) (C)   | YES                       | NO     |
| 52241         | 35.7          | 2.20       | 1.81                   | 712.8552                  | 2      | 0.0193                | AIVLFTSDACGLSDVAHVESLQEK | ICAT-C (C)          | YES                       | YES    |
| 14619         | 36.06         | N/A        | N/A                    | 712.8694                  | 2      | 0.0476                | SQCALEEYVR               | ICAT-C (C)          | YES                       | NO     |
| 52430         | 36.75         | 2.12       | 1.75                   | 712.9309                  | 2      | 0.1708                | AIVLFTSDACGLSDVAHVESLQEK | ICAT-C:13C(9) (C)   | YES                       | YES    |
| 14615         | 37.84         | N/A        | N/A                    | 717.2904                  | 2      | -0.1404               | SQCALEEYVR               | ICAT-C (C)          | YES                       | NO     |
| 14607         | 40.56         | N/A        | N/A                    | 717.3628                  | 2      | 0.0043                | SQCALEEYVR               | ICAT-C (C)          | YES                       | NO     |
| 14620         | 48.12         | N/A        | N/A                    | 717.4346                  | 2      | 0.1479                | SQCALEEYVR               | ICAT-C (C)          | YES                       | NO     |
| 14604         | 48.3          | N/A        | N/A                    | 920.4227                  | 3      | -0.1385               | SQCALEEYVR               | ICAT-C (C)          | YES                       | NO     |
| 14625         | 49.89         | N/A        | N/A                    | 923.4576                  | 3      | -0.0640               | SQCALEEYVR               | ICAT-C (C)          | YES                       | NO     |



**Nuclear factor 1 C-type - Homo sapiens (Human)**

| Accession No. | Protein Score | Ratio(L/H) | Normalized Ratio (L/H) | STD                       | Mass   | Sequence Coverage (%) | Identified Peptide  | Quantitated Peptide | Identified Unique Peptide |        |
|---------------|---------------|------------|------------------------|---------------------------|--------|-----------------------|---------------------|---------------------|---------------------------|--------|
| P08651        | 85            | 2.04       | 1.69                   | 0.18                      | 55640  | 9.8                   | 4                   | 3                   | 2                         |        |
| Spectrum No.  | Peptide Score | Ratio(L/H) | Normalized Ratio (L/H) | Precursor <i>m/z</i> (Da) | Charge | Mass Error (Da)       | Peptide Sequence    | Modification        | Labeled                   | Unique |
| 20865         | 46.28         | 2.28       | 1.89                   | 792.4109                  | 2      | -0.0064               | KAPGCVLSNPDQK       | ICAT-C (C)          | YES                       | YES    |
| 20866         | 33.94         | 2.19       | 1.81                   | 528.6121                  | 3      | 0.0008                | KAPGCVLSNPDQK       | ICAT-C (C)          | YES                       | YES    |
| 41209         | 42.19         | 1.94       | 1.60                   | 735.7402                  | 3      | 0.0728                | DIRPECREDFVLSITGK   | ICAT-C (C)          | YES                       | YES    |
| 44015         | 25.03         | N/A        | N/A                    | 776.4194                  | 3      | 0.0617                | MPSHCLSAQMLAPPPGLPR | ICAT-C (C)          | YES                       | YES    |

**Cellular tumor antigen p53 - Homo sapiens (Human)**

| Accession No. | Protein Score | Ratio(L/H) | Normalized Ratio (L/H) | STD                       | Mass   | Sequence Coverage (%) | Identified Peptide | Quantitated Peptide | Identified Unique Peptide |        |
|---------------|---------------|------------|------------------------|---------------------------|--------|-----------------------|--------------------|---------------------|---------------------------|--------|
| P04637        | 49            | 1.09       | 0.90                   | 0.18                      | 43625  | 6.9                   | 3                  | 3                   | 2                         |        |
| Spectrum No.  | Peptide Score | Ratio(L/H) | Normalized Ratio (L/H) | Precursor <i>m/z</i> (Da) | Charge | Mass Error (Da)       | Peptide Sequence   | Modification        | Labeled                   | Unique |
| 18905         | 25.69         | 1.39       | 1.14                   | 760.3634                  | 2      | -0.0678               | SVTCTYSPALNK       | ICAT-C:13C(9) (C)   | YES                       | YES    |
| 28770         | 30.92         | 1.10       | 0.91                   | 612.6452                  | 3      | 0.0142                | CSDSDGLAPPQHLIR    | ICAT-C (C)          | YES                       | YES    |
| 29123         | 32.46         | 1.06       | 0.88                   | 615.6532                  | 3      | 0.0080                | CSDSDGLAPPQHLIR    | ICAT-C:13C(9) (C)   | YES                       | YES    |

**Nuclear receptor subfamily 2 group F member 6 - Homo sapiens (Human)**

| Accession No. | Protein Score | Ratio(L/H) | Normalized Ratio (L/H) | STD                       | Mass   | Sequence Coverage (%) | Identified Peptide      | Quantitated Peptide | Identified Unique Peptide |        |
|---------------|---------------|------------|------------------------|---------------------------|--------|-----------------------|-------------------------|---------------------|---------------------------|--------|
| P10588        | 78            | 5.18       | 4.28                   | 0.27                      | 42952  | 14.6                  | 4                       | 3                   | 2                         |        |
| Spectrum No.  | Peptide Score | Ratio(L/H) | Normalized Ratio (L/H) | Precursor <i>m/z</i> (Da) | Charge | Mass Error (Da)       | Peptide Sequence        | Modification        | Labeled                   | Unique |
| 19967         | 25.45         | N/A        | N/A                    | 776.7926                  | 2      | -0.1896               | LQVDSAIEYGCLK           | ICAT-C (C)          | YES                       | YES    |
| 43781         | 32.27         | 5.47       | 4.51                   | 772.6881                  | 3      | -0.1267               | FGAGGGAAGAVLGIDNVCELAAR | ICAT-C (C)          | YES                       | YES    |
| 51908         | 35.53         | 4.93       | 4.07                   | 913.7659                  | 3      | -0.0827               | AIALFTPACGLSDPAHVESLQEK | ICAT-C (C)          | YES                       | YES    |
| 51912         | 39.85         | 5.26       | 4.35                   | 913.8162                  | 3      | 0.0684                | AIALFTPACGLSDPAHVESLQEK | ICAT-C (C)          | YES                       | YES    |

**Homeobox protein PKNOX1 - Homo sapiens (Human)**

| Accession No. | Protein Score | Ratio(L/H) | Normalized Ratio (L/H) | STD                       | Mass   | Sequence Coverage (%) | Identified Peptide | Quantitated Peptide       | Identified Unique Peptide |        |
|---------------|---------------|------------|------------------------|---------------------------|--------|-----------------------|--------------------|---------------------------|---------------------------|--------|
| P55347        | 37            | 4.47       | 3.69                   | N/A                       | 47577  | 3.4                   | 1                  | 1                         | 1                         |        |
| Spectrum No.  | Peptide Score | Ratio(L/H) | Normalized Ratio (L/H) | Precursor <i>m/z</i> (Da) | Charge | Mass Error (Da)       | Peptide Sequence   | Modification              | Labeled                   | Unique |
| 30453         | 36.76         | 4.47       | 3.69                   | 946.3527                  | 2      | -0.2158               | ILQPMLDSSCSETPK    | ICAT-C (C); Oxidation (M) | YES                       | YES    |

**Transcription factor Sp1 - Homo sapiens (Human)**

| Accession No. | Protein Score | Ratio(L/H) | Normalized Ratio (L/H) | STD                | Mass   | Sequence Coverage (%) | Identified Peptide               | Quantitated Peptide | Identified Unique Peptide |        |
|---------------|---------------|------------|------------------------|--------------------|--------|-----------------------|----------------------------------|---------------------|---------------------------|--------|
| P08047        | 92            | 3.14       | 2.59                   | N/A                | 80644  | 3.9                   | 5                                | 1                   | 1                         |        |
| Spectrum No.  | Peptide Score | Ratio(L/H) | Normalized Ratio (L/H) | Precursor m/z (Da) | Charge | Mass Error (Da)       | Peptide Sequence                 | Modification        | Labeled                   | Unique |
| 57334         | 28.21         | 3.14       | 2.59                   | 1032.3622          | 3      | -0.3824               | SSSTGSSSSSTGGGGQESQPSPLALLAATCSR | ICAT-C (C)          | YES                       | YES    |
| 57336         | 37.23         | N/A        | N/A                    | 1032.3725          | 3      | -0.3517               | SSSTGSSSSSTGGGGQESQPSPLALLAATCSR | ICAT-C (C)          | YES                       | YES    |
| 57337         | 41.71         | N/A        | N/A                    | 1032.3902          | 3      | -0.2986               | SSSTGSSSSSTGGGGQESQPSPLALLAATCSR | ICAT-C (C)          | YES                       | YES    |
| 57338         | 26.32         | N/A        | N/A                    | 1032.4231          | 3      | -0.1999               | SSSTGSSSSSTGGGGQESQPSPLALLAATCSR | ICAT-C (C)          | YES                       | YES    |
| 57341         | 30.63         | N/A        | N/A                    | 1032.4577          | 3      | -0.0959               | SSSTGSSSSSTGGGGQESQPSPLALLAATCSR | ICAT-C (C)          | YES                       | YES    |

### Nuclear factor 1 A-type - Homo sapiens (Human)

| Accession No. | Protein Score | Ratio(L/H) | Normalized Ratio (L/H) | STD                | Mass   | Sequence Coverage (%) | Identified Peptide            | Quantitated Peptide | Identified Unique Peptide |        |
|---------------|---------------|------------|------------------------|--------------------|--------|-----------------------|-------------------------------|---------------------|---------------------------|--------|
| Q12857        | 75            | 2.54       | 2.10                   | 0.21               | 55909  | 12.4                  | 4                             | 2                   | 2                         |        |
| Spectrum No.  | Peptide Score | Ratio(L/H) | Normalized Ratio (L/H) | Precursor m/z (Da) | Charge | Mass Error (Da)       | Peptide Sequence              | Modification        | Labeled                   | Unique |
| 30140         | 35.37         | N/A        | N/A                    | 628.3251           | 3      | 0.0093                | KPPCCVLSNPDQK                 | 2 ICAT-C (C)        | YES                       | NO     |
| 30143         | 28.91         | N/A        | N/A                    | 628.3289           | 3      | 0.0208                | KPPCCVLSNPDQK                 | 2 ICAT-C (C)        | YES                       | NO     |
| 50018         | 28.1          | 2.48       | 2.05                   | 661.0809           | 4      | -0.0318               | SPQCSNPGLCVQPHHIGVSVK         | 2 ICAT-C (C)        | YES                       | YES    |
| 58217         | 40.18         | 2.77       | 2.29                   | 1068.1475          | 3      | -0.1306               | EFVQLVCPDAGQQAGQVGFNPNNGSSQGK | ICAT-C (C)          | YES                       | YES    |

### Breast cancer type 1 susceptibility protein - Homo sapiens (Human)

| Accession No. | Protein Score | Ratio(L/H) | Normalized Ratio (L/H) | STD                | Mass   | Sequence Coverage (%) | Identified Peptide | Quantitated Peptide | Identified Unique Peptide |        |
|---------------|---------------|------------|------------------------|--------------------|--------|-----------------------|--------------------|---------------------|---------------------------|--------|
| P38398        | 38            | 2.46       | 2.03                   | N/A                | 207592 | 0.4                   | 1                  | 1                   | 1                         |        |
| Spectrum No.  | Peptide Score | Ratio(L/H) | Normalized Ratio (L/H) | Precursor m/z (Da) | Charge | Mass Error (Da)       | Peptide Sequence   | Modification        | Labeled                   | Unique |
| 7078          | 38.46         | 2.46       | 2.03                   | 607.7452           | 2      | -0.1155               | FCLSSQFR           | ICAT-C (C)          | YES                       | YES    |

### Zinc fingers and homeoboxes protein 3 - Homo sapiens (Human)

| Accession No. | Protein Score | Ratio(L/H) | Normalized Ratio (L/H) | STD                | Mass   | Sequence Coverage (%) | Identified Peptide   | Quantitated Peptide | Identified Unique Peptide |        |
|---------------|---------------|------------|------------------------|--------------------|--------|-----------------------|----------------------|---------------------|---------------------------|--------|
| Q9H412        | 60            | 2.21       | 1.82                   | 1.12               | 104592 | 4.0                   | 3                    | 2                   | 2                         |        |
| Spectrum No.  | Peptide Score | Ratio(L/H) | Normalized Ratio (L/H) | Precursor m/z (Da) | Charge | Mass Error (Da)       | Peptide Sequence     | Modification        | Labeled                   | Unique |
| 16865         | 27.94         | N/A        | N/A                    | 733.8430           | 2      | -0.1136               | AELCYLTVVTK          | ICAT-C (C)          | YES                       | YES    |
| 42705         | 55.79         | 3.55       | 2.93                   | 755.3277           | 3      | -0.2269               | VPEVTCIPTTATLATHPSAK | ICAT-C (C)          | YES                       | YES    |
| 44666         | 31.3          | 1.97       | 1.62                   | 788.4465           | 3      | 0.0636                | AELCYLTVVTKYPEEQLK   | ICAT-C:13C(9) (C)   | YES                       | YES    |

### Transcriptional repressor and corepressor

#### Transcriptional repressor CTCF - Homo sapiens (Human)

| Accession No. | Protein Score | Ratio(L/H) | Normalized Ratio (L/H) | STD                       | Mass   | Sequence Coverage (%) | Identified Peptide | Quantitated Peptide | Identified Unique Peptide |        |
|---------------|---------------|------------|------------------------|---------------------------|--------|-----------------------|--------------------|---------------------|---------------------------|--------|
| P49711        | 34            | 11.71      | 9.68                   | N/A                       | 82732  | 2.1                   | 2                  | 1                   | 1                         |        |
| Spectrum No.  | Peptide Score | Ratio(L/H) | Normalized Ratio (L/H) | Precursor <i>m/z</i> (Da) | Charge | Mass Error (Da)       | Peptide Sequence   | Modification        | Labeled                   | Unique |
| 31563         | 25.16         | 11.71      | 9.68                   | 641.3046                  | 3      | -0.0272               | YHDPNFVPAAFVCSK    | ICAT-C (C)          | YES                       | YES    |
| 31567         | 25.45         | N/A        | N/A                    | 641.3147                  | 3      | 0.0032                | YHDPNFVPAAFVCSK    | ICAT-C (C)          | YES                       | YES    |

### Transcription factor CP2-like protein 1 - Homo sapiens (Human)

| Accession No. | Protein Score | Ratio(L/H) | Normalized Ratio (L/H) | STD                       | Mass   | Sequence Coverage (%) | Identified Peptide | Quantitated Peptide | Identified Unique Peptide |        |
|---------------|---------------|------------|------------------------|---------------------------|--------|-----------------------|--------------------|---------------------|---------------------------|--------|
| Q9NZI6        | 331           | 3.16       | 2.61                   | 0.38                      | 54593  | 10.0                  | 24                 | 2                   | 1                         |        |
| Spectrum No.  | Peptide Score | Ratio(L/H) | Normalized Ratio (L/H) | Precursor <i>m/z</i> (Da) | Charge | Mass Error (Da)       | Peptide Sequence   | Modification        | Labeled                   | Unique |
| 24592         | 43.31         | N/A        | N/A                    | 849.8016                  | 2      | -0.2520               | DDLQVQICGPADGIR    | ICAT-C (C)          | YES                       | NO     |
| 24593         | 46.41         | N/A        | N/A                    | 849.8136                  | 2      | -0.2281               | DDLQVQICGPADGIR    | ICAT-C (C)          | YES                       | NO     |
| 24596         | 44.78         | N/A        | N/A                    | 849.8268                  | 2      | -0.2017               | DDLQVQICGPADGIR    | ICAT-C (C)          | YES                       | NO     |
| 24597         | 67.28         | N/A        | N/A                    | 849.8286                  | 2      | -0.1981               | DDLQVQICGPADGIR    | ICAT-C (C)          | YES                       | NO     |
| 24599         | 49.29         | N/A        | N/A                    | 849.8430                  | 2      | -0.1691               | DDLQVQICGPADGIR    | ICAT-C (C)          | YES                       | NO     |
| 24602         | 46.94         | N/A        | N/A                    | 849.8728                  | 2      | -0.1097               | DDLQVQICGPADGIR    | ICAT-C (C)          | YES                       | NO     |
| 24603         | 34.01         | N/A        | N/A                    | 849.8730                  | 2      | -0.1092               | DDLQVQICGPADGIR    | ICAT-C (C)          | YES                       | NO     |
| 24604         | 52.83         | N/A        | N/A                    | 849.8745                  | 2      | -0.1062               | DDLQVQICGPADGIR    | ICAT-C (C)          | YES                       | NO     |
| 24605         | 41.72         | N/A        | N/A                    | 849.8895                  | 2      | -0.0761               | DDLQVQICGPADGIR    | ICAT-C (C)          | YES                       | NO     |
| 24606         | 47.14         | N/A        | N/A                    | 849.8915                  | 2      | -0.0723               | DDLQVQICGPADGIR    | ICAT-C (C)          | YES                       | NO     |
| 24609         | 31.1          | N/A        | N/A                    | 849.9026                  | 2      | -0.0500               | DDLQVQICGPADGIR    | ICAT-C (C)          | YES                       | NO     |
| 24615         | 50.67         | N/A        | N/A                    | 849.9968                  | 2      | 0.1384                | DDLQVQICGPADGIR    | ICAT-C (C)          | YES                       | NO     |
| 24618         | 51.01         | N/A        | N/A                    | 850.0995                  | 2      | 0.3437                | DDLQVQICGPADGIR    | ICAT-C (C)          | YES                       | NO     |
| 24890         | 33.33         | N/A        | N/A                    | 854.3255                  | 2      | -0.2345               | DDLQVQICGPADGIR    | ICAT-C:13C(9) (C)   | YES                       | NO     |
| 24894         | 43.3          | N/A        | N/A                    | 854.3366                  | 2      | -0.2122               | DDLQVQICGPADGIR    | ICAT-C:13C(9) (C)   | YES                       | NO     |
| 24895         | 45.31         | N/A        | N/A                    | 854.3384                  | 2      | -0.2086               | DDLQVQICGPADGIR    | ICAT-C:13C(9) (C)   | YES                       | NO     |
| 24899         | 43.5          | N/A        | N/A                    | 854.3810                  | 2      | -0.1233               | DDLQVQICGPADGIR    | ICAT-C:13C(9) (C)   | YES                       | NO     |
| 24900         | 30.9          | N/A        | N/A                    | 854.3884                  | 2      | -0.1086               | DDLQVQICGPADGIR    | ICAT-C:13C(9) (C)   | YES                       | NO     |
| 24901         | 49.61         | N/A        | N/A                    | 854.3919                  | 2      | -0.1016               | DDLQVQICGPADGIR    | ICAT-C:13C(9) (C)   | YES                       | NO     |
| 24907         | 48.04         | N/A        | N/A                    | 854.4010                  | 2      | -0.0834               | DDLQVQICGPADGIR    | ICAT-C:13C(9) (C)   | YES                       | NO     |
| 24922         | 32.64         | N/A        | N/A                    | 854.5010                  | 2      | 0.1166                | DDLQVQICGPADGIR    | ICAT-C:13C(9) (C)   | YES                       | NO     |
| 34251         | 26.83         | N/A        | N/A                    | 666.6114                  | 3      | -0.2896               | LPPLQYVLC AATSPAVK | ICAT-C (C)          | YES                       | YES    |
| 39169         | 37.86         | 2.98       | 2.46                   | 712.0279                  | 3      | -0.0057               | ASAFIQVHCISTEFTPR  | ICAT-C (C)          | YES                       | YES    |
| 39180         | 33.7          | 3.52       | 2.91                   | 712.0487                  | 3      | 0.0566                | ASAFIQVHCISTEFTPR  | ICAT-C (C)          | YES                       | YES    |

### Zinc finger and BTB domain-containing protein 7A - Homo sapiens (Human)

| Accession No. | Protein Score | Ratio(L/H) | Normalized Ratio (L/H) | STD                       | Mass   | Sequence Coverage (%) | Identified Peptide      | Quantitated Peptide | Identified Unique Peptide |        |
|---------------|---------------|------------|------------------------|---------------------------|--------|-----------------------|-------------------------|---------------------|---------------------------|--------|
| O95365        | 886           | 6.85       | 5.66                   | 1.90                      | 61401  | 11.6                  | 36                      | 15                  | 5                         |        |
| Spectrum No.  | Peptide Score | Ratio(L/H) | Normalized Ratio (L/H) | Precursor <i>m/z</i> (Da) | Charge | Mass Error (Da)       | Peptide Sequence        | Modification        | Labeled                   | Unique |
| 15701         | 37.04         | N/A        | N/A                    | 722.2688                  | 2      | -0.1998               | SVLAACSQYFK             | ICAT-C (C)          | YES                       | YES    |
| 15706         | 39.48         | 6.49       | 5.36                   | 722.2884                  | 2      | -0.1604               | SVLAACSQYFK             | ICAT-C (C)          | YES                       | YES    |
| 15707         | 26.51         | N/A        | N/A                    | 722.2937                  | 2      | -0.1498               | SVLAACSQYFK             | ICAT-C (C)          | YES                       | YES    |
| 15715         | 54.97         | N/A        | N/A                    | 722.3229                  | 2      | -0.0916               | SVLAACSQYFK             | ICAT-C (C)          | YES                       | YES    |
| 15728         | 34.48         | N/A        | N/A                    | 722.3479                  | 2      | -0.0415               | SVLAACSQYFK             | ICAT-C (C)          | YES                       | YES    |
| 15741         | 56.2          | N/A        | N/A                    | 722.3607                  | 2      | -0.0160               | SVLAACSQYFK             | ICAT-C (C)          | YES                       | YES    |
| 16194         | 32.55         | N/A        | N/A                    | 726.8631                  | 2      | -0.0414               | SVLAACSQYFK             | ICAT-C:13C(9) (C)   | YES                       | YES    |
| 20500         | 39.88         | 6.47       | 5.35                   | 786.4250                  | 2      | 0.0178                | SVLAACSQYFKK            | ICAT-C (C)          | YES                       | YES    |
| 28929         | 51.87         | N/A        | N/A                    | 921.3913                  | 2      | -0.2400               | TQGLLCDVILVEGR          | ICAT-C (C)          | YES                       | YES    |
| 28931         | 85.21         | N/A        | N/A                    | 921.4048                  | 2      | -0.2130               | TQGLLCDVILVEGR          | ICAT-C (C)          | YES                       | YES    |
| 28932         | 60.34         | N/A        | N/A                    | 921.4104                  | 2      | -0.2018               | TQGLLCDVILVEGR          | ICAT-C (C)          | YES                       | YES    |
| 28933         | 40.64         | N/A        | N/A                    | 921.4205                  | 2      | -0.1816               | TQGLLCDVILVEGR          | ICAT-C (C)          | YES                       | YES    |
| 28934         | 39.11         | N/A        | N/A                    | 921.4326                  | 2      | -0.1574               | TQGLLCDVILVEGR          | ICAT-C (C)          | YES                       | YES    |
| 28935         | 61.58         | 12.03      | 9.94                   | 921.4365                  | 2      | -0.1496               | TQGLLCDVILVEGR          | ICAT-C (C)          | YES                       | YES    |
| 28936         | 67.85         | N/A        | N/A                    | 921.4442                  | 2      | -0.1343               | TQGLLCDVILVEGR          | ICAT-C (C)          | YES                       | YES    |
| 28941         | 28.83         | N/A        | N/A                    | 921.4591                  | 2      | -0.1044               | TQGLLCDVILVEGR          | ICAT-C (C)          | YES                       | YES    |
| 28949         | 52.22         | N/A        | N/A                    | 921.4767                  | 2      | -0.0693               | TQGLLCDVILVEGR          | ICAT-C (C)          | YES                       | YES    |
| 28950         | 74.04         | N/A        | N/A                    | 921.4800                  | 2      | -0.0626               | TQGLLCDVILVEGR          | ICAT-C (C)          | YES                       | YES    |
| 28954         | 68.52         | N/A        | N/A                    | 921.5170                  | 2      | 0.0114                | TQGLLCDVILVEGR          | ICAT-C (C)          | YES                       | YES    |
| 28955         | 45.59         | N/A        | N/A                    | 921.5210                  | 2      | 0.0194                | TQGLLCDVILVEGR          | ICAT-C (C)          | YES                       | YES    |
| 28957         | 56.41         | N/A        | N/A                    | 921.5251                  | 2      | 0.0275                | TQGLLCDVILVEGR          | ICAT-C (C)          | YES                       | YES    |
| 37679         | 27.38         | 9.22       | 7.62                   | 697.7247                  | 3      | 0.0329                | LLEIPAVSHVCADLLDR       | ICAT-C (C)          | YES                       | YES    |
| 37684         | 30.2          | N/A        | N/A                    | 697.7369                  | 3      | 0.0693                | LLEIPAVSHVCADLLDR       | ICAT-C (C)          | YES                       | YES    |
| 37686         | 28.93         | 8.61       | 7.11                   | 697.7381                  | 3      | 0.0730                | LLEIPAVSHVCADLLDR       | ICAT-C (C)          | YES                       | YES    |
| 37688         | 27.93         | N/A        | N/A                    | 697.7445                  | 3      | 0.0922                | LLEIPAVSHVCADLLDR       | ICAT-C (C)          | YES                       | YES    |
| 37691         | 59.02         | 6.49       | 5.36                   | 697.8000                  | 3      | 0.2588                | LLEIPAVSHVCADLLDR       | ICAT-C (C)          | YES                       | YES    |
| 37702         | 62.89         | 8.12       | 6.70                   | 697.9000                  | 3      | 0.5588                | LLEIPAVSHVCADLLDR       | ICAT-C (C)          | YES                       | YES    |
| 37703         | 30.1          | 9.04       | 7.47                   | 697.9000                  | 3      | 0.5588                | LLEIPAVSHVCADLLDR       | ICAT-C (C)          | YES                       | YES    |
| 37704         | 61.1          | 7.53       | 6.22                   | 1046.4000                 | 2      | 0.6661                | LLEIPAVSHVCADLLDR       | ICAT-C (C)          | YES                       | YES    |
| 38063         | 29.9          | 7.03       | 5.81                   | 700.8000                  | 3      | 0.2286                | LLEIPAVSHVCADLLDR       | ICAT-C:13C(9) (C)   | YES                       | YES    |
| 56814         | 40.97         | N/A        | N/A                    | 762.7799                  | 4      | -0.3477               | HTGKPYLCQQCGAAFAHNYDLK  | 2 ICAT-C (C)        | YES                       | YES    |
| 56815         | 26.76         | 6.18       | 5.10                   | 762.8561                  | 4      | -0.0429               | HTGKPYLCQQCGAAFAHNYDLK  | 2 ICAT-C (C)        | YES                       | YES    |
| 58066         | 39.54         | 4.75       | 3.93                   | 794.8839                  | 4      | -0.0268               | KHTGKPYLCQQCGAAFAHNYDLK | 2 ICAT-C (C)        | YES                       | YES    |
| 58069         | 29            | 4.83       | 3.99                   | 794.8921                  | 4      | 0.0063                | KHTGKPYLCQQCGAAFAHNYDLK | 2 ICAT-C (C)        | YES                       | YES    |
| 58072         | 44.51         | 6.93       | 5.72                   | 794.9161                  | 4      | 0.1022                | KHTGKPYLCQQCGAAFAHNYDLK | 2 ICAT-C (C)        | YES                       | YES    |
| 58073         | 43.54         | 5.54       | 4.58                   | 794.9166                  | 4      | 0.1043                | KHTGKPYLCQQCGAAFAHNYDLK | 2 ICAT-C (C)        | YES                       | YES    |

**C-terminal-binding protein 1 - Homo sapiens (Human)**

| Accession No. | Protein Score | Ratio(L/H) | Normalized Ratio (L/H) | STD                       | Mass   | Sequence Coverage (%) | Identified Peptide   | Quantitated Peptide | Identified Unique Peptide |        |
|---------------|---------------|------------|------------------------|---------------------------|--------|-----------------------|----------------------|---------------------|---------------------------|--------|
| Q13363        | 40            | 2.74       | 2.27                   | N/A                       | 47505  | 4.3                   | 1                    | 1                   | 1                         |        |
| Spectrum No.  | Peptide Score | Ratio(L/H) | Normalized Ratio (L/H) | Precursor <i>m/z</i> (Da) | Charge | Mass Error (Da)       | Peptide Sequence     | Modification        | Labeled                   | Unique |
| 44029         | 40.34         | 2.74       | 2.27                   | 776.7436                  | 3      | 0.0939                | DVATVAFCDQAQSTQEIHEK | ICAT-C:13C(9) (C)   | YES                       | YES    |

### Protein Wiz - Homo sapiens (Human)

| Accession No. | Protein Score | Ratio(L/H) | Normalized Ratio (L/H) | STD                       | Mass   | Sequence Coverage (%) | Identified Peptide | Quantitated Peptide | Identified Unique Peptide |        |
|---------------|---------------|------------|------------------------|---------------------------|--------|-----------------------|--------------------|---------------------|---------------------------|--------|
| O95785        | 117           | 2.37       | 1.96                   | 0.40                      | 178563 | 0.7                   | 12                 | 10                  | 2                         |        |
| Spectrum No.  | Peptide Score | Ratio(L/H) | Normalized Ratio (L/H) | Precursor <i>m/z</i> (Da) | Charge | Mass Error (Da)       | Peptide Sequence   | Modification        | Labeled                   | Unique |
| 28717         | 29.7          | N/A        | N/A                    | 917.7852                  | 2      | -0.2256               | CEFCGEFFENR        | 2 ICAT-C (C)        | YES                       | YES    |
| 28718         | 40.02         | N/A        | N/A                    | 917.7912                  | 2      | -0.2137               | CEFCGEFFENR        | 2 ICAT-C (C)        | YES                       | YES    |
| 28727         | 33.08         | 2.68       | 2.21                   | 917.8454                  | 2      | -0.1052               | CEFCGEFFENR        | 2 ICAT-C (C)        | YES                       | YES    |
| 28728         | 37.94         | 2.57       | 2.12                   | 917.8552                  | 2      | -0.0856               | CEFCGEFFENR        | 2 ICAT-C (C)        | YES                       | YES    |
| 28731         | 43.34         | 2.52       | 2.08                   | 917.8563                  | 2      | -0.0835               | CEFCGEFFENR        | 2 ICAT-C (C)        | YES                       | YES    |
| 29340         | 36.14         | 2.52       | 2.08                   | 926.8788                  | 2      | -0.0988               | CEFCGEFFENR        | 2 ICAT-C:13C(9) (C) | YES                       | YES    |
| 29341         | 33.44         | 2.56       | 2.12                   | 926.8896                  | 2      | -0.0771               | CEFCGEFFENR        | 2 ICAT-C:13C(9) (C) | YES                       | YES    |
| 32942         | 25.08         | 2.74       | 2.26                   | 654.9663                  | 3      | 0.0006                | CEFCGEFFENRK       | 2 ICAT-C (C)        | YES                       | YES    |
| 32946         | 29.78         | 2.41       | 1.99                   | 654.9698                  | 3      | 0.0113                | CEFCGEFFENRK       | 2 ICAT-C (C)        | YES                       | YES    |
| 32948         | 26.43         | 1.33       | 1.09                   | 654.9708                  | 3      | 0.0143                | CEFCGEFFENRK       | 2 ICAT-C (C)        | YES                       | YES    |
| 32952         | 29.95         | 2.32       | 1.92                   | 654.9836                  | 3      | 0.0526                | CEFCGEFFENRK       | 2 ICAT-C (C)        | YES                       | YES    |
| 32953         | 36.7          | 2.29       | 1.89                   | 654.9849                  | 3      | 0.0564                | CEFCGEFFENRK       | 2 ICAT-C (C)        | YES                       | YES    |

### Basic transcription machinery

#### Transcription termination factor 2 - Homo sapiens (Human)

| Accession No. | Protein Score | Ratio(L/H) | Normalized Ratio (L/H) | STD                       | Mass   | Sequence Coverage (%) | Identified Peptide          | Quantitated Peptide | Identified Unique Peptide |        |
|---------------|---------------|------------|------------------------|---------------------------|--------|-----------------------|-----------------------------|---------------------|---------------------------|--------|
| Q9UNY4        | 43            | 2.09       | 1.73                   | 0.02                      | 129508 | 2.3                   | 2                           | 2                   | 1                         |        |
| Spectrum No.  | Peptide Score | Ratio(L/H) | Normalized Ratio (L/H) | Precursor <i>m/z</i> (Da) | Charge | Mass Error (Da)       | Peptide Sequence            | Modification        | Labeled                   | Unique |
| 56918         | 30.4          | 2.10       | 1.74                   | 765.2000                  | 4      | 0.1493                | SLESCPGETVVAEDPAGLKVPLLLHQK | ICAT-C (C)          | YES                       | YES    |
| 56988         | 27.96         | 2.08       | 1.72                   | 767.4225                  | 4      | 0.0092                | SLESCPGETVVAEDPAGLKVPLLLHQK | ICAT-C:13C(9) (C)   | YES                       | YES    |

#### TATA-box-binding protein - Homo sapiens (Human)

| Accession No. | Protein Score | Ratio(L/H) | Normalized Ratio (L/H) | STD                       | Mass   | Sequence Coverage (%) | Identified Peptide | Quantitated Peptide | Identified Unique Peptide |        |
|---------------|---------------|------------|------------------------|---------------------------|--------|-----------------------|--------------------|---------------------|---------------------------|--------|
| P20226        | 210           | 1.04       | 0.86                   | 0.04                      | 37674  | 4.4                   | 10                 | 10                  | 1                         |        |
| Spectrum No.  | Peptide Score | Ratio(L/H) | Normalized Ratio (L/H) | Precursor <i>m/z</i> (Da) | Charge | Mass Error (Da)       | Peptide Sequence   | Modification        | Labeled                   | Unique |

|       |       |      |      |          |   |        |                  |                                  |     |     |
|-------|-------|------|------|----------|---|--------|------------------|----------------------------------|-----|-----|
| 32025 | 31.4  | 1.06 | 0.88 | 645.3406 | 3 | 0.0085 | IQNMVGSCDVKFPPIR | ICAT-C (C)                       | YES | YES |
| 32027 | 32.74 | 1.01 | 0.84 | 645.3441 | 3 | 0.0191 | IQNMVGSCDVKFPPIR | ICAT-C (C)                       | YES | YES |
| 32029 | 25.35 | 1.02 | 0.84 | 645.3457 | 3 | 0.0240 | IQNMVGSCDVKFPPIR | ICAT-C (C)                       | YES | YES |
| 32271 | 54.99 | 1.07 | 0.88 | 648.3492 | 3 | 0.0043 | IQNMVGSCDVKFPPIR | ICAT-C:13C(9) (C)                | YES | YES |
| 32272 | 51.07 | 1.01 | 0.84 | 648.3514 | 3 | 0.0109 | IQNMVGSCDVKFPPIR | ICAT-C:13C(9) (C)                | YES | YES |
| 32274 | 44.11 | 1.16 | 0.96 | 648.3538 | 3 | 0.0180 | IQNMVGSCDVKFPPIR | ICAT-C:13C(9) (C)                | YES | YES |
| 32279 | 42.65 | 1.05 | 0.87 | 648.3702 | 3 | 0.0673 | IQNMVGSCDVKFPPIR | ICAT-C:13C(9) (C)                | YES | YES |
| 32489 | 28.76 | 1.02 | 0.84 | 650.6732 | 3 | 0.0114 | IQNMVGSCDVKFPPIR | ICAT-C (C); Oxidation (M)        | YES | YES |
| 32496 | 29.65 | 1.04 | 0.86 | 650.6883 | 3 | 0.0567 | IQNMVGSCDVKFPPIR | ICAT-C (C); Oxidation (M)        | YES | YES |
| 32820 | 28.82 | 1.04 | 0.86 | 653.6963 | 3 | 0.0505 | IQNMVGSCDVKFPPIR | ICAT-C:13C(9) (C); Oxidation (M) | YES | YES |

### TATA-binding protein-associated factor 172 - Homo sapiens (Human)

| Accession No. | Protein Score | Ratio(L/H) | Normalized Ratio (L/H) | STD                       | Mass   | Sequence Coverage (%) | Identified Peptide    | Quantitated Peptide | Identified Unique Peptide |        |  |
|---------------|---------------|------------|------------------------|---------------------------|--------|-----------------------|-----------------------|---------------------|---------------------------|--------|--|
| O14981        | 97            | 2.05       | 1.70                   | 0.10                      | 206756 | 1.8                   | 4                     | 4                   | 2                         |        |  |
| Spectrum No.  | Peptide Score | Ratio(L/H) | Normalized Ratio (L/H) | Precursor <i>m/z</i> (Da) | Charge | Mass Error (Da)       | Peptide Sequence      | Modification        | Labeled                   | Unique |  |
| 17794         | 46.85         | 1.91       | 1.58                   | 744.8646                  | 2      | -0.0871               | ETCAQTLGVVLK          | ICAT-C (C)          | YES                       | YES    |  |
| 49227         | 29.39         | 1.96       | 1.62                   | 649.3223                  | 4      | 0.0171                | AKCDVDETSSATLSEETEKPK | ICAT-C (C)          | YES                       | YES    |  |
| 49230         | 52.4          | 2.11       | 1.74                   | 649.3312                  | 4      | 0.0527                | AKCDVDETSSATLSEETEKPK | ICAT-C (C)          | YES                       | YES    |  |
| 49372         | 27.09         | 2.12       | 1.75                   | 651.5934                  | 4      | 0.0714                | AKCDVDETSSATLSEETEKPK | ICAT-C:13C(9) (C)   | YES                       | YES    |  |

### SWI/SNF-related proteins

#### SWI/SNF-related matrix-associated actin-dependent regulator of chromatin subfamily B member 1 - Homo sapiens (Human)

| Accession No. | Protein Score | Ratio(L/H) | Normalized Ratio (L/H) | STD                       | Mass   | Sequence Coverage (%) | Identified Peptide            | Quantitated Peptide | Identified Unique Peptide |        |  |
|---------------|---------------|------------|------------------------|---------------------------|--------|-----------------------|-------------------------------|---------------------|---------------------------|--------|--|
| Q12824        | 69            | 3.59       | 2.97                   | 0.73                      | 44113  | 13.2                  | 5                             | 4                   | 2                         |        |  |
| Spectrum No.  | Peptide Score | Ratio(L/H) | Normalized Ratio (L/H) | Precursor <i>m/z</i> (Da) | Charge | Mass Error (Da)       | Peptide Sequence              | Modification        | Labeled                   | Unique |  |
| 53609         | 30.14         | 3.65       | 3.01                   | 946.0000                  | 3      | 0.6679                | NTGDADQWCPLLETLTDAEMEKK       | ICAT-C (C)          | YES                       | YES    |  |
| 53802         | 31.92         | 4.82       | 3.98                   | 948.8218                  | 3      | 0.1033                | NTGDADQWCPLLETLTDAEMEKK       | ICAT-C:13C(9) (C)   | YES                       | YES    |  |
| 59147         | 31.13         | N/A        | N/A                    | 847.4267                  | 4      | 0.0013                | TFPLCFDDHDPVAVIHENASQPEVLVPIR | ICAT-C (C)          | YES                       | YES    |  |
| 59149         | 27.12         | 3.83       | 3.16                   | 847.4483                  | 4      | 0.0876                | TFPLCFDDHDPVAVIHENASQPEVLVPIR | ICAT-C (C)          | YES                       | YES    |  |
| 59206         | 33.49         | 3.06       | 2.53                   | 849.6996                  | 4      | 0.0625                | TFPLCFDDHDPVAVIHENASQPEVLVPIR | ICAT-C:13C(9) (C)   | YES                       | YES    |  |

#### SWI/SNF-related matrix-associated actin-dependent regulator of chromatin subfamily C member 2 - Homo sapiens (Human)

| Accession No. | Protein Score | Ratio(L/H) | Normalized Ratio (L/H) | STD                       | Mass   | Sequence Coverage (%) | Identified Peptide | Quantitated Peptide | Identified Unique Peptide |        |  |
|---------------|---------------|------------|------------------------|---------------------------|--------|-----------------------|--------------------|---------------------|---------------------------|--------|--|
| Q8TAQ2        | 1529          | 2.51       | 2.07                   | 0.39                      | 132797 | 8.1                   | 124                | 51                  | 4                         |        |  |
| Spectrum No.  | Peptide Score | Ratio(L/H) | Normalized Ratio (L/H) | Precursor <i>m/z</i> (Da) | Charge | Mass Error (Da)       | Peptide Sequence   | Modification        | Labeled                   | Unique |  |
| 3295          | 30.03         | 2.61       | 2.16                   | 500.1770                  | 2      | -0.1501               | CFLDFK             | ICAT-C (C)          | YES                       | YES    |  |
| 3296          | 27.18         | 2.76       | 2.28                   | 500.1839                  | 2      | -0.1362               | CFLDFK             | ICAT-C (C)          | YES                       | YES    |  |

|       |       |      |      |          |   |         |              |                                  |     |     |
|-------|-------|------|------|----------|---|---------|--------------|----------------------------------|-----|-----|
| 3297  | 27.44 | N/A  | N/A  | 500.1847 | 2 | -0.1346 | CFLDFK       | ICAT-C (C)                       | YES | YES |
| 3298  | 27.62 | 2.54 | 2.10 | 500.1886 | 2 | -0.1269 | CFLDFK       | ICAT-C (C)                       | YES | YES |
| 3299  | 27.5  | 2.68 | 2.22 | 500.1897 | 2 | -0.1248 | CFLDFK       | ICAT-C (C)                       | YES | YES |
| 3301  | 25.95 | 2.45 | 2.02 | 500.1913 | 2 | -0.1215 | CFLDFK       | ICAT-C (C)                       | YES | YES |
| 3311  | 29.15 | N/A  | N/A  | 500.2184 | 2 | -0.0674 | CFLDFK       | ICAT-C (C)                       | YES | YES |
| 3322  | 27.21 | 3.06 | 2.53 | 500.2540 | 2 | 0.0039  | CFLDFK       | ICAT-C (C)                       | YES | YES |
| 3324  | 27.38 | 2.47 | 2.04 | 500.2572 | 2 | 0.0104  | CFLDFK       | ICAT-C (C)                       | YES | YES |
| 3334  | 35.1  | 2.93 | 2.42 | 500.2951 | 2 | 0.0861  | CFLDFK       | ICAT-C (C)                       | YES | YES |
| 3335  | 29.45 | 2.49 | 2.06 | 500.3123 | 2 | 0.1205  | CFLDFK       | ICAT-C (C)                       | YES | YES |
| 3338  | 28.94 | 3.47 | 2.86 | 500.3212 | 2 | 0.1383  | CFLDFK       | ICAT-C (C)                       | YES | YES |
| 3340  | 25.63 | 2.57 | 2.12 | 500.3567 | 2 | 0.2094  | CFLDFK       | ICAT-C (C)                       | YES | YES |
| 3341  | 27.86 | 2.48 | 2.05 | 500.4000 | 2 | 0.2959  | CFLDFK       | ICAT-C (C)                       | YES | YES |
| 3342  | 27.85 | 2.64 | 2.18 | 500.4589 | 2 | 0.4138  | CFLDFK       | ICAT-C (C)                       | YES | YES |
| 3404  | 26.56 | 2.54 | 2.10 | 504.7017 | 2 | -0.1308 | CFLDFK       | ICAT-C:13C(9) (C)                | YES | YES |
| 3406  | 25.23 | 2.48 | 2.05 | 504.7026 | 2 | -0.1290 | CFLDFK       | ICAT-C:13C(9) (C)                | YES | YES |
| 3410  | 28.9  | N/A  | N/A  | 504.7396 | 2 | -0.0551 | CFLDFK       | ICAT-C:13C(9) (C)                | YES | YES |
| 3412  | 26.94 | 2.48 | 2.05 | 504.7630 | 2 | -0.0084 | CFLDFK       | ICAT-C:13C(9) (C)                | YES | YES |
| 3419  | 26.5  | 2.50 | 2.07 | 504.9524 | 2 | 0.3705  | CFLDFK       | ICAT-C:13C(9) (C)                | YES | YES |
| 5101  | 26.88 | N/A  | N/A  | 563.2196 | 2 | -0.1619 | TPEIYLAYR    |                                  | NO  | NO  |
| 5102  | 35.32 | N/A  | N/A  | 563.2242 | 2 | -0.1527 | TPEIYLAYR    |                                  | NO  | NO  |
| 5103  | 44.34 | N/A  | N/A  | 563.2269 | 2 | -0.1474 | TPEIYLAYR    |                                  | NO  | NO  |
| 5108  | 44.32 | N/A  | N/A  | 563.2843 | 2 | -0.0326 | TPEIYLAYR    |                                  | NO  | NO  |
| 5116  | 27.94 | N/A  | N/A  | 563.3826 | 2 | 0.1641  | TPEIYLAYR    |                                  | NO  | NO  |
| 5117  | 38.6  | N/A  | N/A  | 563.3893 | 2 | 0.1775  | TPEIYLAYR    |                                  | NO  | NO  |
| 10136 | 26.16 | N/A  | N/A  | 666.3104 | 2 | -0.1467 | SLVALLVETQMK |                                  | NO  | NO  |
| 10148 | 32.86 | N/A  | N/A  | 666.3841 | 2 | 0.0007  | SLVALLVETQMK |                                  | NO  | NO  |
| 12464 | 25.03 | N/A  | N/A  | 695.2968 | 2 | -0.1113 | NLAGDVCAIMR  | ICAT-C (C)                       | YES | YES |
| 12506 | 27.21 | 2.00 | 1.65 | 695.3713 | 2 | 0.0376  | NLAGDVCAIMR  | ICAT-C (C)                       | YES | YES |
| 12514 | 28.68 | N/A  | N/A  | 695.3766 | 2 | 0.0482  | NLAGDVCAIMR  | ICAT-C (C)                       | YES | YES |
| 13507 | 30    | N/A  | N/A  | 703.2573 | 2 | -0.1853 | NLAGDVCAIMR  | ICAT-C (C); Oxidation (M)        | YES | YES |
| 13513 | 48.67 | 2.88 | 2.38 | 703.2708 | 2 | -0.1584 | NLAGDVCAIMR  | ICAT-C (C); Oxidation (M)        | YES | YES |
| 13518 | 40.03 | 2.40 | 1.99 | 703.2734 | 2 | -0.1530 | NLAGDVCAIMR  | ICAT-C (C); Oxidation (M)        | YES | YES |
| 13528 | 39.33 | 2.99 | 2.47 | 703.2798 | 2 | -0.1403 | NLAGDVCAIMR  | ICAT-C (C); Oxidation (M)        | YES | YES |
| 13531 | 33.77 | N/A  | N/A  | 703.2975 | 2 | -0.1050 | NLAGDVCAIMR  | ICAT-C (C); Oxidation (M)        | YES | YES |
| 13550 | 30.69 | 2.51 | 2.08 | 703.3484 | 2 | -0.0031 | NLAGDVCAIMR  | ICAT-C (C); Oxidation (M)        | YES | YES |
| 13585 | 26.3  | 3.20 | 2.65 | 703.4290 | 2 | 0.1581  | NLAGDVCAIMR  | ICAT-C (C); Oxidation (M)        | YES | YES |
| 13587 | 42.35 | 2.57 | 2.12 | 703.4300 | 2 | 0.1600  | NLAGDVCAIMR  | ICAT-C (C); Oxidation (M)        | YES | YES |
| 13593 | 39.91 | 2.71 | 2.24 | 703.5000 | 2 | 0.3001  | NLAGDVCAIMR  | ICAT-C (C); Oxidation (M)        | YES | YES |
| 14020 | 36.77 | 2.60 | 2.15 | 707.7901 | 2 | -0.1498 | NLAGDVCAIMR  | ICAT-C:13C(9) (C); Oxidation (M) | YES | YES |
| 14021 | 32.94 | 2.54 | 2.10 | 707.7916 | 2 | -0.1468 | NLAGDVCAIMR  | ICAT-C:13C(9) (C); Oxidation (M) | YES | YES |
| 14022 | 34.95 | N/A  | N/A  | 707.7929 | 2 | -0.1444 | NLAGDVCAIMR  | ICAT-C:13C(9) (C); Oxidation (M) | YES | YES |
| 14031 | 25.62 | N/A  | N/A  | 707.8499 | 2 | -0.0303 | NLAGDVCAIMR  | ICAT-C:13C(9) (C); Oxidation (M) | YES | YES |
| 14051 | 28.51 | 2.52 | 2.08 | 707.9434 | 2 | 0.1568  | NLAGDVCAIMR  | ICAT-C:13C(9) (C); Oxidation (M) | YES | YES |
| 21455 | 28.02 | N/A  | N/A  | 534.6001 | 3 | -0.0248 | TQDECILHFLR  | ICAT-C (C)                       | YES | NO  |
| 21460 | 34.97 | N/A  | N/A  | 534.6052 | 3 | -0.0095 | TQDECILHFLR  | ICAT-C (C)                       | YES | NO  |

|       |       |      |      |          |   |         |                |                   |     |     |
|-------|-------|------|------|----------|---|---------|----------------|-------------------|-----|-----|
| 21464 | 25.66 | N/A  | N/A  | 534.6074 | 3 | -0.0028 | TQDECILHFLR    | ICAT-C (C)        | YES | NO  |
| 21466 | 26.45 | N/A  | N/A  | 534.6084 | 3 | 0.0003  | TQDECILHFLR    | ICAT-C (C)        | YES | NO  |
| 21467 | 33.32 | N/A  | N/A  | 534.6087 | 3 | 0.0011  | TQDECILHFLR    | ICAT-C (C)        | YES | NO  |
| 21469 | 28.64 | N/A  | N/A  | 534.6090 | 3 | 0.0021  | TQDECILHFLR    | ICAT-C (C)        | YES | NO  |
| 21470 | 34.07 | 2.44 | 2.02 | 534.6095 | 3 | -0.0328 | AGGSLCHILAAAYK | ICAT-C (C)        | YES | YES |
| 21471 | 26.55 | N/A  | N/A  | 534.6099 | 3 | 0.0046  | TQDECILHFLR    | ICAT-C (C)        | YES | NO  |
| 21472 | 36.27 | 3.70 | 3.06 | 534.6101 | 3 | -0.0309 | AGGSLCHILAAAYK | ICAT-C (C)        | YES | YES |
| 21473 | 28.65 | N/A  | N/A  | 534.6105 | 3 | 0.0064  | TQDECILHFLR    | ICAT-C (C)        | YES | NO  |
| 21476 | 48.41 | 2.44 | 2.01 | 534.6110 | 3 | -0.0285 | AGGSLCHILAAAYK | ICAT-C (C)        | YES | YES |
| 21484 | 28.66 | 2.42 | 2.00 | 534.6156 | 3 | -0.0144 | AGGSLCHILAAAYK | ICAT-C (C)        | YES | YES |
| 21488 | 42.5  | 2.39 | 1.98 | 534.6179 | 3 | -0.0075 | AGGSLCHILAAAYK | ICAT-C (C)        | YES | YES |
| 21496 | 40.82 | 2.58 | 2.13 | 534.6251 | 3 | 0.0140  | AGGSLCHILAAAYK | ICAT-C (C)        | YES | YES |
| 21497 | 33.03 | 2.47 | 2.04 | 534.6261 | 3 | 0.0169  | AGGSLCHILAAAYK | ICAT-C (C)        | YES | YES |
| 21498 | 40.95 | 2.67 | 2.21 | 534.6266 | 3 | 0.0184  | AGGSLCHILAAAYK | ICAT-C (C)        | YES | YES |
| 21499 | 33.06 | 2.55 | 2.11 | 534.6286 | 3 | 0.0244  | AGGSLCHILAAAYK | ICAT-C (C)        | YES | YES |
| 21503 | 34.48 | N/A  | N/A  | 801.5000 | 2 | 0.1823  | TQDECILHFLR    | ICAT-C (C)        | YES | NO  |
| 21505 | 49.8  | 2.31 | 1.91 | 534.6876 | 3 | 0.2016  | AGGSLCHILAAAYK | ICAT-C (C)        | YES | YES |
| 21506 | 39.12 | N/A  | N/A  | 801.5640 | 2 | 0.3102  | TQDECILHFLR    | ICAT-C (C)        | YES | NO  |
| 21507 | 79.91 | N/A  | N/A  | 801.6000 | 2 | 0.3823  | TQDECILHFLR    | ICAT-C (C)        | YES | NO  |
| 21508 | 67.29 | N/A  | N/A  | 801.6000 | 2 | 0.3823  | TQDECILHFLR    | ICAT-C (C)        | YES | NO  |
| 21509 | 34.03 | N/A  | N/A  | 534.8000 | 3 | 0.5750  | TQDECILHFLR    | ICAT-C (C)        | YES | NO  |
| 21510 | 74.71 | N/A  | N/A  | 801.7000 | 2 | 0.5823  | TQDECILHFLR    | ICAT-C (C)        | YES | NO  |
| 21775 | 29.04 | N/A  | N/A  | 805.8000 | 2 | -0.2479 | TQDECILHFLR    | ICAT-C:13C(9) (C) | YES | NO  |
| 21778 | 58.44 | N/A  | N/A  | 805.9016 | 2 | -0.0447 | TQDECILHFLR    | ICAT-C:13C(9) (C) | YES | NO  |
| 21779 | 25.16 | N/A  | N/A  | 537.6053 | 3 | -0.0392 | TQDECILHFLR    | ICAT-C:13C(9) (C) | YES | NO  |
| 21780 | 25.36 | N/A  | N/A  | 537.6063 | 3 | -0.0362 | TQDECILHFLR    | ICAT-C:13C(9) (C) | YES | NO  |
| 21781 | 27.03 | N/A  | N/A  | 537.6076 | 3 | -0.0324 | TQDECILHFLR    | ICAT-C:13C(9) (C) | YES | NO  |
| 21783 | 28.25 | N/A  | N/A  | 537.6111 | 3 | -0.0218 | TQDECILHFLR    | ICAT-C:13C(9) (C) | YES | NO  |
| 21784 | 29.58 | N/A  | N/A  | 537.6124 | 3 | -0.0181 | TQDECILHFLR    | ICAT-C:13C(9) (C) | YES | NO  |
| 21785 | 37.38 | N/A  | N/A  | 537.6147 | 3 | -0.0110 | TQDECILHFLR    | ICAT-C:13C(9) (C) | YES | NO  |
| 21788 | 39.43 | N/A  | N/A  | 537.6180 | 3 | -0.0013 | TQDECILHFLR    | ICAT-C:13C(9) (C) | YES | NO  |
| 21789 | 39.04 | 2.47 | 2.04 | 537.6185 | 3 | -0.0359 | AGGSLCHILAAAYK | ICAT-C:13C(9) (C) | YES | YES |
| 21790 | 28.73 | N/A  | N/A  | 537.6186 | 3 | 0.0007  | TQDECILHFLR    | ICAT-C:13C(9) (C) | YES | NO  |
| 21791 | 34.47 | N/A  | N/A  | 537.6186 | 3 | 0.0008  | TQDECILHFLR    | ICAT-C:13C(9) (C) | YES | NO  |
| 21792 | 27.91 | N/A  | N/A  | 537.6192 | 3 | 0.0024  | TQDECILHFLR    | ICAT-C:13C(9) (C) | YES | NO  |
| 21795 | 52.84 | N/A  | N/A  | 805.9281 | 2 | 0.0083  | TQDECILHFLR    | ICAT-C:13C(9) (C) | YES | NO  |
| 21796 | 32.32 | 2.37 | 1.96 | 537.6228 | 3 | -0.0230 | AGGSLCHILAAAYK | ICAT-C:13C(9) (C) | YES | YES |
| 21797 | 27.7  | N/A  | N/A  | 537.6231 | 3 | 0.0140  | TQDECILHFLR    | ICAT-C:13C(9) (C) | YES | NO  |
| 21799 | 28.34 | N/A  | N/A  | 537.6235 | 3 | 0.0154  | TQDECILHFLR    | ICAT-C:13C(9) (C) | YES | NO  |
| 21801 | 31.24 | N/A  | N/A  | 537.6247 | 3 | 0.0190  | TQDECILHFLR    | ICAT-C:13C(9) (C) | YES | NO  |
| 21803 | 29.61 | N/A  | N/A  | 537.6252 | 3 | 0.0205  | TQDECILHFLR    | ICAT-C:13C(9) (C) | YES | NO  |
| 21804 | 33.1  | 2.91 | 2.41 | 537.6269 | 3 | -0.0108 | AGGSLCHILAAAYK | ICAT-C:13C(9) (C) | YES | YES |
| 21805 | 34.97 | 2.50 | 2.07 | 537.6276 | 3 | -0.0087 | AGGSLCHILAAAYK | ICAT-C:13C(9) (C) | YES | YES |
| 21806 | 45.55 | 2.50 | 2.07 | 537.6289 | 3 | -0.0047 | AGGSLCHILAAAYK | ICAT-C:13C(9) (C) | YES | YES |
| 21807 | 26.42 | N/A  | N/A  | 537.6305 | 3 | 0.0364  | TQDECILHFLR    | ICAT-C:13C(9) (C) | YES | NO  |



|       |       |      |      |          |   |         |                        |                   |     |     |
|-------|-------|------|------|----------|---|---------|------------------------|-------------------|-----|-----|
| 21808 | 38.38 | 4.54 | 3.75 | 537.6311 | 3 | 0.0016  | AGGSLCHILAAAYK         | ICAT-C:13C(9) (C) | YES | YES |
| 21809 | 32.2  | N/A  | N/A  | 537.6313 | 3 | 0.0388  | TQDECILHFLR            | ICAT-C:13C(9) (C) | YES | NO  |
| 21810 | 25.49 | 2.58 | 2.13 | 537.6325 | 3 | 0.0058  | AGGSLCHILAAAYK         | ICAT-C:13C(9) (C) | YES | YES |
| 21812 | 34.82 | 2.45 | 2.02 | 537.6341 | 3 | 0.0108  | AGGSLCHILAAAYK         | ICAT-C:13C(9) (C) | YES | YES |
| 21813 | 27.52 | 2.74 | 2.26 | 537.6358 | 3 | 0.0159  | AGGSLCHILAAAYK         | ICAT-C:13C(9) (C) | YES | YES |
| 21814 | 33.13 | 2.58 | 2.13 | 537.6360 | 3 | 0.0164  | AGGSLCHILAAAYK         | ICAT-C:13C(9) (C) | YES | YES |
| 21815 | 39.66 | 2.70 | 2.23 | 537.6395 | 3 | 0.0271  | AGGSLCHILAAAYK         | ICAT-C:13C(9) (C) | YES | YES |
| 21817 | 38.71 | 2.90 | 2.39 | 537.6434 | 3 | 0.0387  | AGGSLCHILAAAYK         | ICAT-C:13C(9) (C) | YES | YES |
| 21823 | 75.25 | N/A  | N/A  | 806.1000 | 2 | 0.3521  | TQDECILHFLR            | ICAT-C:13C(9) (C) | YES | NO  |
| 21824 | 28.43 | N/A  | N/A  | 537.8000 | 3 | 0.5448  | TQDECILHFLR            | ICAT-C:13C(9) (C) | YES | NO  |
| 25245 | 38.23 | N/A  | N/A  | 861.8203 | 2 | -0.2146 | LNPQEYLTSTACR          | ICAT-C (C)        | YES | NO  |
| 25246 | 34.94 | N/A  | N/A  | 861.8246 | 2 | -0.2061 | LNPQEYLTSTACR          | ICAT-C (C)        | YES | NO  |
| 25248 | 66.68 | N/A  | N/A  | 861.8377 | 2 | -0.1798 | LNPQEYLTSTACR          | ICAT-C (C)        | YES | NO  |
| 25249 | 57.42 | N/A  | N/A  | 861.8436 | 2 | -0.1680 | LNPQEYLTSTACR          | ICAT-C (C)        | YES | NO  |
| 25250 | 41.77 | N/A  | N/A  | 861.8443 | 2 | -0.1667 | LNPQEYLTSTACR          | ICAT-C (C)        | YES | NO  |
| 25252 | 38    | N/A  | N/A  | 861.8491 | 2 | -0.1570 | LNPQEYLTSTACR          | ICAT-C (C)        | YES | NO  |
| 25253 | 27.56 | N/A  | N/A  | 861.8529 | 2 | -0.1494 | LNPQEYLTSTACR          | ICAT-C (C)        | YES | NO  |
| 25254 | 43.95 | N/A  | N/A  | 861.8740 | 2 | -0.1072 | LNPQEYLTSTACR          | ICAT-C (C)        | YES | NO  |
| 25255 | 29.93 | N/A  | N/A  | 861.8763 | 2 | -0.1026 | LNPQEYLTSTACR          | ICAT-C (C)        | YES | NO  |
| 25256 | 43.94 | N/A  | N/A  | 861.8807 | 2 | -0.0937 | LNPQEYLTSTACR          | ICAT-C (C)        | YES | NO  |
| 25257 | 59.09 | N/A  | N/A  | 861.8836 | 2 | -0.0879 | LNPQEYLTSTACR          | ICAT-C (C)        | YES | NO  |
| 25260 | 34.19 | N/A  | N/A  | 861.9059 | 2 | -0.0434 | LNPQEYLTSTACR          | ICAT-C (C)        | YES | NO  |
| 25263 | 41.52 | N/A  | N/A  | 861.9273 | 2 | -0.0006 | LNPQEYLTSTACR          | ICAT-C (C)        | YES | NO  |
| 25270 | 56.58 | N/A  | N/A  | 862.0000 | 2 | 0.1448  | LNPQEYLTSTACR          | ICAT-C (C)        | YES | NO  |
| 25272 | 40.56 | N/A  | N/A  | 862.0297 | 2 | 0.2042  | LNPQEYLTSTACR          | ICAT-C (C)        | YES | NO  |
| 25273 | 30.8  | N/A  | N/A  | 862.0353 | 2 | 0.2155  | LNPQEYLTSTACR          | ICAT-C (C)        | YES | NO  |
| 25275 | 66.92 | N/A  | N/A  | 862.0851 | 2 | 0.3149  | LNPQEYLTSTACR          | ICAT-C (C)        | YES | NO  |
| 25458 | 66.72 | N/A  | N/A  | 866.3489 | 2 | -0.1875 | LNPQEYLTSTACR          | ICAT-C:13C(9) (C) | YES | NO  |
| 25459 | 50.52 | N/A  | N/A  | 866.3549 | 2 | -0.1755 | LNPQEYLTSTACR          | ICAT-C:13C(9) (C) | YES | NO  |
| 25463 | 46.09 | N/A  | N/A  | 866.3824 | 2 | -0.1205 | LNPQEYLTSTACR          | ICAT-C:13C(9) (C) | YES | NO  |
| 25470 | 43.11 | N/A  | N/A  | 866.4401 | 2 | -0.0051 | LNPQEYLTSTACR          | ICAT-C:13C(9) (C) | YES | NO  |
| 56034 | 27.27 | 2.50 | 2.06 | 990.2191 | 3 | 0.1044  | SLVQNNCLSRPNIFLCPEIEPK | 2 ICAT-C (C)      | YES | YES |

**SWI/SNF-related matrix-associated actin-dependent regulator of chromatin subfamily E member 1 - Homo sapiens (Human)**

| Accession No. | Protein Score | Ratio(L/H) | Normalized Ratio (L/H) | STD                | Mass   | Sequence Coverage (%) | Identified Peptide | Quantitated Peptide | Identified Unique Peptide |        |
|---------------|---------------|------------|------------------------|--------------------|--------|-----------------------|--------------------|---------------------|---------------------------|--------|
| Q969G3        | 71            | 2.45       | 2.03                   | 0.12               | 46621  | 2.9                   | 4                  | 4                   | 1                         |        |
| Spectrum No.  | Peptide Score | Ratio(L/H) | Normalized Ratio (L/H) | Precursor m/z (Da) | Charge | Mass Error (Da)       | Peptide Sequence   | Modification        | Labeled                   | Unique |
| 21109         | 27.71         | 2.41       | 1.99                   | 530.9492           | 3      | 0.0100                | LCGLKVEVDMEK       | ICAT-C (C)          | YES                       | YES    |
| 21111         | 27.91         | 2.55       | 2.11                   | 530.9517           | 3      | 0.0176                | LCGLKVEVDMEK       | ICAT-C (C)          | YES                       | YES    |
| 21112         | 35.25         | 2.27       | 1.88                   | 530.9519           | 3      | 0.0183                | LCGLKVEVDMEK       | ICAT-C (C)          | YES                       | YES    |
| 21114         | 32.95         | 2.51       | 2.08                   | 530.9530           | 3      | 0.0216                | LCGLKVEVDMEK       | ICAT-C (C)          | YES                       | YES    |

**AT-rich interactive domain-containing protein 1A - Homo sapiens (Human)**

| Accession No. | Protein Score | Ratio(L/H) | Normalized Ratio (L/H) | STD                       | Mass   | Sequence Coverage (%) | Identified Peptide | Quantitated Peptide | Identified Unique Peptide |        |
|---------------|---------------|------------|------------------------|---------------------------|--------|-----------------------|--------------------|---------------------|---------------------------|--------|
| O14497        | 34            | 2.72       | 2.25                   | 0.25                      | 241892 | 0.6                   | 3                  | 3                   | 1                         |        |
| Spectrum No.  | Peptide Score | Ratio(L/H) | Normalized Ratio (L/H) | Precursor <i>m/z</i> (Da) | Charge | Mass Error (Da)       | Peptide Sequence   | Modification        | Labeled                   | Unique |
| 27361         | 28.73         | 3.03       | 2.50                   | 597.9484                  | 3      | -0.0386               | NDPFVDCSDKLGR      | ICAT-C (C)          | YES                       | YES    |
| 27362         | 29.61         | 2.56       | 2.11                   | 597.9643                  | 3      | 0.0089                | NDPFVDCSDKLGR      | ICAT-C (C)          | YES                       | YES    |
| 27366         | 33.96         | 2.94       | 2.43                   | 597.9685                  | 3      | 0.0214                | NDPFVDCSDKLGR      | ICAT-C (C)          | YES                       | YES    |

**AT-rich interactive domain-containing protein 2 - Homo sapiens (Human)**

| Accession No. | Protein Score | Ratio(L/H) | Normalized Ratio (L/H) | STD                       | Mass   | Sequence Coverage (%) | Identified Peptide          | Quantitated Peptide              | Identified Unique Peptide |        |
|---------------|---------------|------------|------------------------|---------------------------|--------|-----------------------|-----------------------------|----------------------------------|---------------------------|--------|
| Q68CP9        | 1226          | 2.36       | 1.95                   | 0.51                      | 197268 | 9.6                   | 51                          | 42                               | 9                         |        |
| Spectrum No.  | Peptide Score | Ratio(L/H) | Normalized Ratio (L/H) | Precursor <i>m/z</i> (Da) | Charge | Mass Error (Da)       | Peptide Sequence            | Modification                     | Labeled                   | Unique |
| 9795          | 49.34         | N/A        | N/A                    | 660.7578                  | 2      | -0.1567               | GMEILGNLCK                  | ICAT-C (C); Oxidation (M)        | YES                       | YES    |
| 23784         | 27.56         | 2.56       | 2.11                   | 836.3362                  | 2      | -0.1759               | CLYELNFTVQSK                | ICAT-C (C)                       | YES                       | YES    |
| 23792         | 25.28         | N/A        | N/A                    | 836.3738                  | 2      | -0.1008               | CLYELNFTVQSK                | ICAT-C (C)                       | YES                       | YES    |
| 23798         | 30.12         | N/A        | N/A                    | 836.4147                  | 2      | -0.0190               | CLYELNFTVQSK                | ICAT-C (C)                       | YES                       | YES    |
| 26098         | 51.21         | 2.24       | 1.85                   | 877.7905                  | 2      | -0.1873               | AEMYSEYLSTCSK               | ICAT-C (C); Oxidation (M)        | YES                       | YES    |
| 26101         | 46.87         | N/A        | N/A                    | 877.8504                  | 2      | -0.0676               | AEMYSEYLSTCSK               | ICAT-C (C); Oxidation (M)        | YES                       | YES    |
| 26380         | 55.09         | 1.83       | 1.51                   | 882.3114                  | 2      | -0.1759               | AEMYSEYLSTCSK               | ICAT-C:13C(9) (C); Oxidation (M) | YES                       | YES    |
| 43769         | 53.73         | 1.53       | 1.26                   | 1158.4103                 | 2      | -0.2314               | AEDNGVLICEYVDQDSYR          | ICAT-C (C)                       | YES                       | YES    |
| 43771         | 56.78         | N/A        | N/A                    | 1158.4136                 | 2      | -0.2250               | AEDNGVLICEYVDQDSYR          | ICAT-C (C)                       | YES                       | YES    |
| 43776         | 62.58         | 2.52       | 2.08                   | 1158.4724                 | 2      | -0.1074               | AEDNGVLICEYVDQDSYR          | ICAT-C (C)                       | YES                       | YES    |
| 43778         | 74.89         | 3.32       | 2.74                   | 1158.4974                 | 2      | -0.0573               | AEDNGVLICEYVDQDSYR          | ICAT-C (C)                       | YES                       | YES    |
| 43779         | 62.75         | 1.79       | 1.48                   | 1158.5007                 | 2      | -0.0508               | AEDNGVLICEYVDQDSYR          | ICAT-C (C)                       | YES                       | YES    |
| 43780         | 34.67         | 0.76       | 0.63                   | 1158.5033                 | 2      | -0.0455               | AEDNGVLICEYVDQDSYR          | ICAT-C (C)                       | YES                       | YES    |
| 43966         | 39.6          | 1.62       | 1.33                   | 1162.9308                 | 2      | -0.2208               | AEDNGVLICEYVDQDSYR          | ICAT-C:13C(9) (C)                | YES                       | YES    |
| 43967         | 51.14         | 2.46       | 2.03                   | 1162.9614                 | 2      | -0.1595               | AEDNGVLICEYVDQDSYR          | ICAT-C:13C(9) (C)                | YES                       | YES    |
| 43970         | 42.18         | 3.12       | 2.58                   | 1162.9961                 | 2      | -0.0901               | AEDNGVLICEYVDQDSYR          | ICAT-C:13C(9) (C)                | YES                       | YES    |
| 43971         | 58.29         | 1.79       | 1.48                   | 1163.0171                 | 2      | -0.0480               | AEDNGVLICEYVDQDSYR          | ICAT-C:13C(9) (C)                | YES                       | YES    |
| 44488         | 41.94         | 2.22       | 1.83                   | 590.1405                  | 4      | 0.3484                | KPLVNGICDFDKGDGSHLSK        | ICAT-C (C)                       | YES                       | YES    |
| 44731         | 49.64         | 2.55       | 2.11                   | 592.3061                  | 4      | -0.0193               | KPLVNGICDFDKGDGSHLSK        | ICAT-C:13C(9) (C)                | YES                       | YES    |
| 44741         | 31.56         | 2.42       | 2.00                   | 592.3959                  | 4      | 0.3398                | KPLVNGICDFDKGDGSHLSK        | ICAT-C:13C(9) (C)                | YES                       | YES    |
| 48497         | 26.42         | 2.10       | 1.73                   | 849.7748                  | 3      | 0.0115                | IICQKEEEAKEATGLHVHER        | ICAT-C (C)                       | YES                       | YES    |
| 49472         | 27.64         | 2.96       | 2.44                   | 652.8243                  | 4      | -0.0396               | HCSKDALLAGLQDEPGQAGSQK      | ICAT-C (C)                       | YES                       | YES    |
| 49620         | 25.16         | 2.95       | 2.44                   | 655.0965                  | 4      | 0.0193                | HCSKDALLAGLQDEPGQAGSQK      | ICAT-C:13C(9) (C)                | YES                       | YES    |
| 53482         | 36.81         | 2.32       | 1.92                   | 707.9000                  | 4      | 0.1422                | SDLRKPLVNGICDFDKGDGSHLSK    | ICAT-C (C)                       | YES                       | YES    |
| 53483         | 45.95         | 2.30       | 1.90                   | 707.9000                  | 4      | 0.1422                | SDLRKPLVNGICDFDKGDGSHLSK    | ICAT-C (C)                       | YES                       | YES    |
| 53641         | 33.15         | 2.30       | 1.90                   | 710.1087                  | 4      | -0.0533               | SDLRKPLVNGICDFDKGDGSHLSK    | ICAT-C:13C(9) (C)                | YES                       | YES    |
| 53644         | 36.5          | 2.46       | 2.03                   | 710.1152                  | 4      | -0.0272               | SDLRKPLVNGICDFDKGDGSHLSK    | ICAT-C:13C(9) (C)                | YES                       | YES    |
| 55919         | 65.78         | 2.30       | 1.90                   | 987.3599                  | 3      | -0.3614               | IQSETNQCSLISNGPSLELGENGASGK | ICAT-C (C)                       | YES                       | YES    |

|       |       |      |      |           |   |         |                               |                                  |     |     |
|-------|-------|------|------|-----------|---|---------|-------------------------------|----------------------------------|-----|-----|
| 55920 | 92.46 | 2.72 | 2.25 | 987.3714  | 3 | -0.3268 | IQSETNQCSLISNGPSLELGENGASGK   | ICAT-C (C)                       | YES | YES |
| 55922 | 53.7  | 2.50 | 2.06 | 987.3822  | 3 | -0.2943 | IQSETNQCSLISNGPSLELGENGASGK   | ICAT-C (C)                       | YES | YES |
| 55926 | 48.3  | 2.65 | 2.19 | 987.4376  | 3 | -0.1281 | IQSETNQCSLISNGPSLELGENGASGK   | ICAT-C (C)                       | YES | YES |
| 55927 | 40.59 | 2.49 | 2.06 | 987.4411  | 3 | -0.1179 | IQSETNQCSLISNGPSLELGENGASGK   | ICAT-C (C)                       | YES | YES |
| 55928 | 53.16 | N/A  | N/A  | 987.4525  | 3 | -0.0835 | IQSETNQCSLISNGPSLELGENGASGK   | ICAT-C (C)                       | YES | YES |
| 55934 | 39.6  | 2.43 | 2.01 | 987.5368  | 3 | 0.1693  | IQSETNQCSLISNGPSLELGENGASGK   | ICAT-C (C)                       | YES | YES |
| 56042 | 85.57 | 2.31 | 1.91 | 990.3692  | 3 | -0.3637 | IQSETNQCSLISNGPSLELGENGASGK   | ICAT-C:13C(9) (C)                | YES | YES |
| 56043 | 54.2  | 2.69 | 2.23 | 990.3820  | 3 | -0.3253 | IQSETNQCSLISNGPSLELGENGASGK   | ICAT-C:13C(9) (C)                | YES | YES |
| 56044 | 79.49 | 2.38 | 1.96 | 990.3921  | 3 | -0.2948 | IQSETNQCSLISNGPSLELGENGASGK   | ICAT-C:13C(9) (C)                | YES | YES |
| 56046 | 89.18 | 2.69 | 2.22 | 990.4356  | 3 | -0.1644 | IQSETNQCSLISNGPSLELGENGASGK   | ICAT-C:13C(9) (C)                | YES | YES |
| 56047 | 37.02 | 2.51 | 2.08 | 990.4543  | 3 | -0.1085 | IQSETNQCSLISNGPSLELGENGASGK   | ICAT-C:13C(9) (C)                | YES | YES |
| 56053 | 40.09 | 2.36 | 1.95 | 990.5514  | 3 | 0.1829  | IQSETNQCSLISNGPSLELGENGASGK   | ICAT-C:13C(9) (C)                | YES | YES |
| 57203 | 35.67 | N/A  | N/A  | 1028.7356 | 3 | -0.3418 | IVTISDPNAGCSATMVAVPAGADPSTVAK | ICAT-C (C)                       | YES | YES |
| 57209 | 33.62 | 3.42 | 2.83 | 1028.8076 | 3 | -0.1256 | IVTISDPNAGCSATMVAVPAGADPSTVAK | ICAT-C (C)                       | YES | YES |
| 57318 | 31.66 | N/A  | N/A  | 1031.7432 | 3 | -0.3491 | IVTISDPNAGCSATMVAVPAGADPSTVAK | ICAT-C:13C(9) (C)                | YES | YES |
| 57409 | 42.45 | 2.49 | 2.06 | 1034.0630 | 3 | -0.3544 | IVTISDPNAGCSATMVAVPAGADPSTVAK | ICAT-C (C); Oxidation (M)        | YES | YES |
| 57411 | 26.42 | N/A  | N/A  | 1034.0703 | 3 | -0.3325 | IVTISDPNAGCSATMVAVPAGADPSTVAK | ICAT-C (C); Oxidation (M)        | YES | YES |
| 57415 | 38.7  | 2.89 | 2.39 | 1034.1309 | 3 | -0.1508 | IVTISDPNAGCSATMVAVPAGADPSTVAK | ICAT-C (C); Oxidation (M)        | YES | YES |
| 57416 | 28.84 | 2.89 | 2.39 | 1034.2116 | 3 | 0.0912  | IVTISDPNAGCSATMVAVPAGADPSTVAK | ICAT-C (C); Oxidation (M)        | YES | YES |
| 57417 | 33.77 | 3.22 | 2.66 | 1034.2136 | 3 | 0.0973  | IVTISDPNAGCSATMVAVPAGADPSTVAK | ICAT-C (C); Oxidation (M)        | YES | YES |
| 57418 | 48.68 | 3.20 | 2.64 | 1034.2236 | 3 | 0.1273  | IVTISDPNAGCSATMVAVPAGADPSTVAK | ICAT-C (C); Oxidation (M)        | YES | YES |
| 57420 | 27.39 | 2.39 | 1.97 | 1034.3000 | 3 | 0.3565  | IVTISDPNAGCSATMVAVPAGADPSTVAK | ICAT-C (C); Oxidation (M)        | YES | YES |
| 57501 | 31.4  | 2.69 | 2.22 | 1037.1419 | 3 | -0.1481 | IVTISDPNAGCSATMVAVPAGADPSTVAK | ICAT-C:13C(9) (C); Oxidation (M) | YES | YES |

## Histone modifying proteins

### Histone-lysine N-methyltransferase, H3 lysine-9 specific 5 - Homo sapiens (Human)

| Accession No. | Protein Score | Ratio(L/H) | Normalized Ratio (L/H) | STD                       | Mass   | Sequence Coverage (%) | Identified Peptide | Quantitated Peptide | Identified Unique Peptide |        |
|---------------|---------------|------------|------------------------|---------------------------|--------|-----------------------|--------------------|---------------------|---------------------------|--------|
| Q9H9B1        | 1231          | 3.15       | 2.60                   | 1.02                      | 138166 | 16.2                  | 66                 | 58                  | 11                        |        |
| Spectrum No.  | Peptide Score | Ratio(L/H) | Normalized Ratio (L/H) | Precursor <i>m/z</i> (Da) | Charge | Mass Error (Da)       | Peptide Sequence   | Modification        | Labeled                   | Unique |
| 17877         | 33.96         | N/A        | N/A                    | 746.8044                  | 2      | -0.1924               | APLLVLCEDHR        | ICAT-C (C)          | YES                       | YES    |
| 17887         | 36.47         | N/A        | N/A                    | 746.8712                  | 2      | -0.0590               | APLLVLCEDHR        | ICAT-C (C)          | YES                       | YES    |
| 17893         | 37.68         | 4.79       | 3.96                   | 746.8883                  | 2      | -0.0248               | APLLVLCEDHR        | ICAT-C (C)          | YES                       | YES    |
| 17902         | 60.52         | 3.39       | 2.80                   | 746.9029                  | 2      | 0.0044                | APLLVLCEDHR        | ICAT-C (C)          | YES                       | YES    |
| 17904         | 33.21         | 2.96       | 2.44                   | 498.2731                  | 3      | 0.0106                | APLLVLCEDHR        | ICAT-C (C)          | YES                       | YES    |
| 19614         | 44.84         | 3.04       | 2.51                   | 771.8898                  | 2      | 0.0143                | DAEGSTCLHLLAAK     | ICAT-C (C)          | YES                       | YES    |
| 19617         | 48.11         | 1.43       | 1.18                   | 771.8934                  | 2      | 0.0216                | DAEGSTCLHLLAAK     | ICAT-C (C)          | YES                       | YES    |
| 28894         | 28.93         | 2.40       | 1.99                   | 614.3043                  | 3      | -0.0392               | ENRYDCVWLFLSR      | ICAT-C (C)          | YES                       | YES    |
| 28897         | 34.15         | 3.28       | 2.71                   | 614.3118                  | 3      | -0.0164               | ENRYDCVWLFLSR      | ICAT-C (C)          | YES                       | YES    |
| 28900         | 26.52         | 3.28       | 2.71                   | 614.3151                  | 3      | -0.0067               | ENRYDCVWLFLSR      | ICAT-C (C)          | YES                       | YES    |
| 28906         | 29.51         | 3.02       | 2.49                   | 614.3241                  | 3      | 0.0203                | ENRYDCVWLFLSR      | ICAT-C (C)          | YES                       | YES    |
| 28909         | 30.02         | N/A        | N/A                    | 614.3258                  | 3      | 0.0253                | ENRYDCVWLFLSR      | ICAT-C (C)          | YES                       | YES    |
| 28912         | 27.75         | 3.37       | 2.78                   | 614.3291                  | 3      | 0.0352                | ENRYDCVWLFLSR      | ICAT-C (C)          | YES                       | YES    |

|       |       |      |      |          |   |         |                        |                           |     |     |
|-------|-------|------|------|----------|---|---------|------------------------|---------------------------|-----|-----|
| 28915 | 28.98 | 3.69 | 3.05 | 614.3339 | 3 | 0.0498  | ENRYDCVVLFLSR          | ICAT-C (C)                | YES | YES |
| 29275 | 30.11 | 3.12 | 2.58 | 617.3158 | 3 | -0.0347 | ENRYDCVVLFLSR          | ICAT-C:13C(9) (C)         | YES | YES |
| 29285 | 35.67 | 3.12 | 2.57 | 617.3341 | 3 | 0.0202  | ENRYDCVVLFLSR          | ICAT-C:13C(9) (C)         | YES | YES |
| 29529 | 78.71 | 3.40 | 2.81 | 930.8881 | 2 | -0.2311 | SQTAQLPFVLAHAVSR       | ICAT-C (C)                | YES | YES |
| 29530 | 52.02 | 4.79 | 3.95 | 930.8913 | 2 | -0.2247 | SQTAQLPFVLAHAVSR       | ICAT-C (C)                | YES | YES |
| 29533 | 81.67 | 3.88 | 3.20 | 930.9067 | 2 | -0.1938 | SQTAQLPFVLAHAVSR       | ICAT-C (C)                | YES | YES |
| 29538 | 67.93 | 4.62 | 3.81 | 930.9516 | 2 | -0.1042 | SQTAQLPFVLAHAVSR       | ICAT-C (C)                | YES | YES |
| 29540 | 25.38 | 8.06 | 6.66 | 930.9642 | 2 | -0.0789 | SQTAQLPFVLAHAVSR       | ICAT-C (C)                | YES | YES |
| 29547 | 25.29 | 3.87 | 3.20 | 931.0059 | 2 | 0.0046  | SQTAQLPFVLAHAVSR       | ICAT-C (C)                | YES | YES |
| 29736 | 30.44 | 4.72 | 3.90 | 935.3944 | 2 | -0.2487 | SQTAQLPFVLAHAVSR       | ICAT-C:13C(9) (C)         | YES | YES |
| 29737 | 58.35 | 3.49 | 2.88 | 935.4128 | 2 | -0.2118 | SQTAQLPFVLAHAVSR       | ICAT-C:13C(9) (C)         | YES | YES |
| 29740 | 28.12 | 7.89 | 6.52 | 935.4657 | 2 | -0.1060 | SQTAQLPFVLAHAVSR       | ICAT-C:13C(9) (C)         | YES | YES |
| 30789 | 35.76 | 3.19 | 2.63 | 634.6746 | 3 | 0.0291  | FINHHCEPNLVPVR         | ICAT-C (C)                | YES | YES |
| 30798 | 28.57 | 3.16 | 2.61 | 634.8000 | 3 | 0.4052  | FINHHCEPNLVPVR         | ICAT-C (C)                | YES | YES |
| 31138 | 42.42 | 3.02 | 2.49 | 637.5915 | 3 | -0.2507 | FINHHCEPNLVPVR         | ICAT-C:13C(9) (C)         | YES | YES |
| 32620 | 36.6  | 3.44 | 2.84 | 977.3418 | 2 | -0.2394 | YVSQNCVTSPMNIDR        | ICAT-C (C)                | YES | YES |
| 32626 | 37.02 | 3.35 | 2.77 | 977.3956 | 2 | -0.1317 | YVSQNCVTSPMNIDR        | ICAT-C (C)                | YES | YES |
| 32630 | 37.28 | 3.65 | 3.02 | 977.4134 | 2 | -0.0961 | YVSQNCVTSPMNIDR        | ICAT-C (C)                | YES | YES |
| 32631 | 42.98 | 3.68 | 3.04 | 977.4137 | 2 | -0.0956 | YVSQNCVTSPMNIDR        | ICAT-C (C)                | YES | YES |
| 33291 | 37.11 | 3.36 | 2.77 | 985.4289 | 2 | -0.0600 | YVSQNCVTSPMNIDR        | ICAT-C (C); Oxidation (M) | YES | YES |
| 40444 | 54.52 | 3.45 | 2.85 | 727.0006 | 3 | 0.0329  | VNNASYCPHCGEESK        | 2 ICAT-C (C)              | YES | YES |
| 40940 | 26.59 | 2.84 | 2.34 | 733.0179 | 3 | 0.0245  | VNNASYCPHCGEESK        | 2 ICAT-C:13C(9) (C)       | YES | YES |
| 42761 | 44.33 | 3.14 | 2.59 | 567.2885 | 4 | -0.0188 | CDLHAVNIHGDSPHIAAR     | ICAT-C (C)                | YES | YES |
| 42762 | 43.11 | N/A  | N/A  | 756.0501 | 3 | -0.0152 | CDLHAVNIHGDSPHIAAR     | ICAT-C (C)                | YES | YES |
| 42766 | 45.21 | 3.66 | 3.03 | 567.2938 | 4 | 0.0023  | CDLHAVNIHGDSPHIAAR     | ICAT-C (C)                | YES | YES |
| 42767 | 33.8  | 3.70 | 3.06 | 567.2963 | 4 | 0.0124  | CDLHAVNIHGDSPHIAAR     | ICAT-C (C)                | YES | YES |
| 42991 | 51.72 | 3.18 | 2.63 | 569.5485 | 4 | -0.0088 | CDLHAVNIHGDSPHIAAR     | ICAT-C:13C(9) (C)         | YES | YES |
| 42992 | 33.45 | 3.52 | 2.91 | 569.5512 | 4 | 0.0019  | CDLHAVNIHGDSPHIAAR     | ICAT-C:13C(9) (C)         | YES | YES |
| 42996 | 37.11 | 4.07 | 3.36 | 569.5643 | 4 | 0.0541  | CDLHAVNIHGDSPHIAAR     | ICAT-C:13C(9) (C)         | YES | YES |
| 42999 | 44.72 | 3.53 | 2.91 | 569.6000 | 4 | 0.1971  | CDLHAVNIHGDSPHIAAR     | ICAT-C:13C(9) (C)         | YES | YES |
| 43000 | 37.31 | 3.26 | 2.69 | 569.6325 | 4 | 0.3269  | CDLHAVNIHGDSPHIAAR     | ICAT-C:13C(9) (C)         | YES | YES |
| 43374 | 28.22 | 3.54 | 2.92 | 574.3045 | 4 | 0.0154  | AGALVDPKDAEGSTCLHAAK   | ICAT-C (C)                | YES | YES |
| 50391 | 64.95 | 2.79 | 2.31 | 886.9915 | 3 | -0.2852 | EITTLANNQCMATESVDHELGR | ICAT-C (C)                | YES | YES |
| 50396 | 52.06 | 2.87 | 2.37 | 887.0026 | 3 | -0.2519 | EITTLANNQCMATESVDHELGR | ICAT-C (C)                | YES | YES |
| 50397 | 31.34 | 3.16 | 2.61 | 887.0029 | 3 | -0.2509 | EITTLANNQCMATESVDHELGR | ICAT-C (C)                | YES | YES |
| 50399 | 30.46 | 3.66 | 3.02 | 887.0299 | 3 | -0.1697 | EITTLANNQCMATESVDHELGR | ICAT-C (C)                | YES | YES |
| 50401 | 34.05 | 2.78 | 2.30 | 887.0860 | 3 | -0.0017 | EITTLANNQCMATESVDHELGR | ICAT-C (C)                | YES | YES |
| 50402 | 56.05 | 2.99 | 2.47 | 887.1000 | 3 | 0.0404  | EITTLANNQCMATESVDHELGR | ICAT-C (C)                | YES | YES |
| 50406 | 68.37 | 3.16 | 2.61 | 887.1211 | 3 | 0.1036  | EITTLANNQCMATESVDHELGR | ICAT-C (C)                | YES | YES |
| 50408 | 37.45 | N/A  | N/A  | 887.1252 | 3 | 0.1161  | EITTLANNQCMATESVDHELGR | ICAT-C (C)                | YES | YES |
| 50413 | 37.73 | 3.86 | 3.19 | 887.2096 | 3 | 0.3693  | EITTLANNQCMATESVDHELGR | ICAT-C (C)                | YES | YES |
| 50517 | 35.37 | 2.88 | 2.38 | 890.0078 | 3 | -0.2664 | EITTLANNQCMATESVDHELGR | ICAT-C:13C(9) (C)         | YES | YES |
| 50522 | 33.92 | 2.53 | 2.09 | 890.0921 | 3 | -0.0134 | EITTLANNQCMATESVDHELGR | ICAT-C:13C(9) (C)         | YES | YES |
| 50532 | 53.81 | 2.91 | 2.40 | 890.1133 | 3 | 0.0500  | EITTLANNQCMATESVDHELGR | ICAT-C:13C(9) (C)         | YES | YES |
| 50541 | 48.38 | 3.17 | 2.62 | 890.1283 | 3 | 0.0952  | EITTLANNQCMATESVDHELGR | ICAT-C:13C(9) (C)         | YES | YES |

|       |       |      |      |           |   |         |                                    |                                  |     |     |
|-------|-------|------|------|-----------|---|---------|------------------------------------|----------------------------------|-----|-----|
| 50545 | 44.04 | 3.45 | 2.85 | 890.2173  | 3 | 0.3622  | EITTLANNQCMATESVDHELGR             | ICAT-C:13C(9) (C)                | YES | YES |
| 50546 | 27.31 | 3.74 | 3.09 | 890.2242  | 3 | 0.3827  | EITTLANNQCMATESVDHELGR             | ICAT-C:13C(9) (C)                | YES | YES |
| 50679 | 65.67 | N/A  | N/A  | 892.3282  | 3 | -0.2697 | EITTLANNQCMATESVDHELGR             | ICAT-C (C); Oxidation (M)        | YES | YES |
| 50683 | 30.97 | 4.21 | 3.48 | 892.3336  | 3 | -0.2538 | EITTLANNQCMATESVDHELGR             | ICAT-C (C); Oxidation (M)        | YES | YES |
| 50698 | 39.63 | N/A  | N/A  | 892.5664  | 3 | 0.4448  | EITTLANNQCMATESVDHELGR             | ICAT-C (C); Oxidation (M)        | YES | YES |
| 50867 | 32.37 | 3.42 | 2.82 | 895.4637  | 3 | 0.1063  | EITTLANNQCMATESVDHELGR             | ICAT-C:13C(9) (C); Oxidation (M) | YES | YES |
| 56391 | 32.37 | 3.02 | 2.49 | 1001.1552 | 3 | -0.0293 | NKEGETPLQCASLNSQVWSALQMSK          | ICAT-C:13C(9) (C); Oxidation (M) | YES | YES |
| 60854 | 28.92 | N/A  | N/A  | 1284.9352 | 3 | -0.1560 | VKGILSSQAEGLANGPDVLETDGLQEVLPLCSCR | 2 ICAT-C (C)                     | YES | YES |

### Histone-lysine N-methyltransferase, H3 lysine-9 specific 3 - Homo sapiens (Human)

| Accession No. | Protein Score | Ratio(L/H) | Normalized Ratio (L/H) | STD                | Mass   | Sequence Coverage (%) | Identified Peptide | Quantitated Peptide | Identified Unique Peptide |        |
|---------------|---------------|------------|------------------------|--------------------|--------|-----------------------|--------------------|---------------------|---------------------------|--------|
| Q96KQ7        | 870           | 2.97       | 2.45                   | 0.56               | 132287 | 16.1                  | 49                 | 37                  | 7                         |        |
| Spectrum No.  | Peptide Score | Ratio(L/H) | Normalized Ratio (L/H) | Precursor m/z (Da) | Charge | Mass Error (Da)       | Peptide Sequence   | Modification        | Labeled                   | Unique |
| 18136         | 43.91         | N/A        | N/A                    | 749.8865           | 2      | -0.0212               | VALMVLCE THR       | ICAT-C (C)          | YES                       | YES    |
| 18137         | 71.97         | 3.39       | 2.80                   | 749.8898           | 2      | -0.0146               | VALMVLCE THR       | ICAT-C (C)          | YES                       | YES    |
| 18138         | 65            | 4.01       | 3.31                   | 749.8956           | 2      | -0.0030               | VALMVLCE THR       | ICAT-C (C)          | YES                       | YES    |
| 18144         | 53.14         | N/A        | N/A                    | 749.9079           | 2      | 0.0216                | VALMVLCE THR       | ICAT-C (C)          | YES                       | YES    |
| 18146         | 66.43         | 2.71       | 2.24                   | 749.9225           | 2      | 0.0509                | VALMVLCE THR       | ICAT-C (C)          | YES                       | YES    |
| 18438         | 34.06         | 3.37       | 2.79                   | 754.4006           | 2      | -0.0232               | VALMVLCE THR       | ICAT-C:13C(9) (C)   | YES                       | YES    |
| 18439         | 55.98         | N/A        | N/A                    | 754.4070           | 2      | -0.0103               | VALMVLCE THR       | ICAT-C:13C(9) (C)   | YES                       | YES    |
| 18441         | 27.48         | 3.45       | 2.85                   | 754.4197           | 2      | 0.0152                | VALMVLCE THR       | ICAT-C:13C(9) (C)   | YES                       | YES    |
| 26624         | 48.74         | 2.76       | 2.28                   | 590.6400           | 3      | 0.0091                | CKHSAEIALEQSR      | ICAT-C (C)          | YES                       | YES    |
| 27887         | 27            | 3.81       | 3.15                   | 603.6305           | 3      | -0.0229               | ESYHDCVLLFLSR      | ICAT-C (C)          | YES                       | YES    |
| 27889         | 36.73         | 5.14       | 4.24                   | 603.6353           | 3      | -0.0087               | ESYHDCVLLFLSR      | ICAT-C (C)          | YES                       | YES    |
| 27891         | 36.18         | 3.80       | 3.14                   | 603.6361           | 3      | -0.0062               | ESYHDCVLLFLSR      | ICAT-C (C)          | YES                       | YES    |
| 27896         | 28.08         | N/A        | N/A                    | 603.6425           | 3      | 0.0130                | ESYHDCVLLFLSR      | ICAT-C (C)          | YES                       | YES    |
| 27897         | 31.77         | 3.56       | 2.94                   | 603.6426           | 3      | 0.0134                | ESYHDCVLLFLSR      | ICAT-C (C)          | YES                       | YES    |
| 27898         | 30.2          | N/A        | N/A                    | 603.6430           | 3      | -0.0178               | TPLMEAVVNNHLEVAR   | Oxidation (M)       | NO                        | YES    |
| 29963         | 40.86         | 3.36       | 2.78                   | 626.6589           | 3      | -0.0432               | FINHLCDPNIIPVR     | ICAT-C (C)          | YES                       | YES    |
| 29965         | 27.75         | 2.98       | 2.46                   | 626.6614           | 3      | -0.0359               | FINHLCDPNIIPVR     | ICAT-C (C)          | YES                       | YES    |
| 29968         | 30.04         | 3.07       | 2.54                   | 626.6711           | 3      | -0.0065               | FINHLCDPNIIPVR     | ICAT-C (C)          | YES                       | YES    |
| 29973         | 33.7          | 3.05       | 2.52                   | 626.6781           | 3      | 0.0144                | FINHLCDPNIIPVR     | ICAT-C (C)          | YES                       | YES    |
| 29975         | 30.09         | 2.78       | 2.30                   | 626.6818           | 3      | 0.0254                | FINHLCDPNIIPVR     | ICAT-C (C)          | YES                       | YES    |
| 29980         | 46.92         | 3.07       | 2.53                   | 939.7064           | 2      | 0.4001                | FINHLCDPNIIPVR     | ICAT-C (C)          | YES                       | YES    |
| 29982         | 45.63         | 3.01       | 2.49                   | 626.9000           | 3      | 0.6800                | FINHLCDPNIIPVR     | ICAT-C (C)          | YES                       | YES    |
| 30266         | 31.63         | 3.21       | 2.65                   | 629.6679           | 3      | -0.0465               | FINHLCDPNIIPVR     | ICAT-C:13C(9) (C)   | YES                       | YES    |
| 30276         | 31.18         | 3.00       | 2.48                   | 629.6841           | 3      | 0.0020                | FINHLCDPNIIPVR     | ICAT-C:13C(9) (C)   | YES                       | YES    |
| 30277         | 32.6          | 2.83       | 2.34                   | 629.6843           | 3      | 0.0029                | FINHLCDPNIIPVR     | ICAT-C:13C(9) (C)   | YES                       | YES    |
| 30280         | 31.69         | 2.79       | 2.30                   | 629.6959           | 3      | 0.0377                | FINHLCDPNIIPVR     | ICAT-C:13C(9) (C)   | YES                       | YES    |
| 44055         | 41.06         | 3.14       | 2.59                   | 583.2837           | 4      | -0.0328               | CDLHAVNYHGDTPHIAAR | ICAT-C (C)          | YES                       | YES    |
| 44068         | 41.15         | 3.39       | 2.80                   | 583.3746           | 4      | 0.3307                | CDLHAVNYHGDTPHIAAR | ICAT-C (C)          | YES                       | YES    |
| 44230         | 46.66         | 3.12       | 2.58                   | 585.5450           | 4      | -0.0177               | CDLHAVNYHGDTPHIAAR | ICAT-C:13C(9) (C)   | YES                       | YES    |

|       |       |      |      |           |   |         |                                      |                                    |     |     |
|-------|-------|------|------|-----------|---|---------|--------------------------------------|------------------------------------|-----|-----|
| 44233 | 28.32 | 3.41 | 2.82 | 585.5552  | 4 | 0.0229  | CDLHAVNYHGDTPHIAAR                   | ICAT-C:13C(9) (C)                  | YES | YES |
| 44234 | 25.38 | 3.09 | 2.56 | 585.5566  | 4 | 0.0284  | CDLHAVNYHGDTPHIAAR                   | ICAT-C:13C(9) (C)                  | YES | YES |
| 44238 | 34.05 | 3.21 | 2.65 | 585.6354  | 4 | 0.3438  | CDLHAVNYHGDTPHIAAR                   | ICAT-C:13C(9) (C)                  | YES | YES |
| 44967 | 42.61 | 2.69 | 2.23 | 793.3340  | 3 | -0.2623 | GSVEICHVLLQAGANINAVDK                | ICAT-C (C)                         | YES | YES |
| 45150 | 30.74 | 2.70 | 2.23 | 796.3381  | 3 | -0.2800 | GSVEICHVLLQAGANINAVDK                | ICAT-C:13C(9) (C)                  | YES | YES |
| 47725 | 28.54 | N/A  | N/A  | 626.9000  | 4 | 0.2915  | YYGNISRFINHLCDPNIIPVR                |                                    | NO  | YES |
| 49692 | 26.09 | N/A  | N/A  | 874.6745  | 3 | -0.2594 | CMATESVDGELSGCNAAILKR                | 2 ICAT-C (C)                       | YES | YES |
| 49693 | 44.27 | N/A  | N/A  | 874.6754  | 3 | -0.2567 | CMATESVDGELSGCNAAILKR                | 2 ICAT-C (C)                       | YES | YES |
| 49696 | 63.78 | 2.55 | 2.11 | 874.6821  | 3 | -0.2366 | CMATESVDGELSGCNAAILKR                | 2 ICAT-C (C)                       | YES | YES |
| 49713 | 31.04 | 2.91 | 2.40 | 874.7936  | 3 | 0.0979  | CMATESVDGELSGCNAAILKR                | 2 ICAT-C (C)                       | YES | YES |
| 49718 | 40.89 | 2.83 | 2.33 | 874.8817  | 3 | 0.3620  | CMATESVDGELSGCNAAILKR                | 2 ICAT-C (C)                       | YES | YES |
| 49719 | 27.25 | N/A  | N/A  | 874.8823  | 3 | 0.3639  | CMATESVDGELSGCNAAILKR                | 2 ICAT-C (C)                       | YES | YES |
| 49964 | 49.06 | 2.49 | 2.06 | 879.9989  | 3 | -0.2811 | CMATESVDGELSGCNAAILKR                | 2 ICAT-C (C); Oxidation (M)        | YES | YES |
| 49966 | 31.69 | 4.35 | 3.59 | 880.0196  | 3 | -0.2191 | CMATESVDGELSGCNAAILKR                | 2 ICAT-C (C); Oxidation (M)        | YES | YES |
| 49982 | 37.47 | 3.08 | 2.55 | 880.2157  | 3 | 0.3692  | CMATESVDGELSGCNAAILKR                | 2 ICAT-C (C); Oxidation (M)        | YES | YES |
| 50002 | 45.45 | 2.07 | 1.71 | 880.7647  | 3 | -0.0491 | CMATESVDGELSGCNAAILKR                | 2 ICAT-C:13C(9) (C)                | YES | YES |
| 50308 | 37.87 | 2.37 | 1.96 | 886.0971  | 3 | -0.0468 | CMATESVDGELSGCNAAILKR                | 2 ICAT-C:13C(9) (C); Oxidation (M) | YES | YES |
| 53430 | 32.55 | N/A  | N/A  | 941.4537  | 3 | 0.1004  | EDDSYLFDLDNKDGVEYCIDAR               | ICAT-C (C)                         | YES | YES |
| 61273 | 38.19 | N/A  | N/A  | 1014.6774 | 4 | 0.6191  | RPPCDPLADTIDSSGSLTLPNGGCLSAVGLPLGPGR | 2 ICAT-C (C)                       | YES | YES |
| 61300 | 37.83 | N/A  | N/A  | 1019.0000 | 4 | -0.1511 | RPPCDPLADTIDSSGSLTLPNGGCLSAVGLPLGPGR | 2 ICAT-C:13C(9) (C)                | YES | YES |

### Histone deacetylase complex subunit SAP130 - Homo sapiens (Human)

| Accession No. | Protein Score | Ratio(L/H) | Normalized Ratio (L/H) | STD                | Mass   | Sequence Coverage (%) | Identified Peptide    | Quantitated Peptide | Identified Unique Peptide |        |
|---------------|---------------|------------|------------------------|--------------------|--------|-----------------------|-----------------------|---------------------|---------------------------|--------|
| Q9H0E3        | 52            | 2.34       | 1.93                   | 0.25               | 110255 | 2.0                   | 3                     | 3                   | 1                         |        |
| Spectrum No.  | Peptide Score | Ratio(L/H) | Normalized Ratio (L/H) | Precursor m/z (Da) | Charge | Mass Error (Da)       | Peptide Sequence      | Modification        | Labeled                   | Unique |
| 51034         | 36.37         | 2.69       | 2.22                   | 898.1171           | 3      | -0.0509               | VHLCAAQLLQLTNLEHDVYER | ICAT-C (C)          | YES                       | YES    |
| 51037         | 32.8          | 2.30       | 1.90                   | 673.9000           | 4      | 0.1907                | VHLCAAQLLQLTNLEHDVYER | ICAT-C (C)          | YES                       | YES    |
| 51271         | 29.22         | 2.23       | 1.84                   | 676.1172           | 4      | 0.0293                | VHLCAAQLLQLTNLEHDVYER | ICAT-C:13C(9) (C)   | YES                       | YES    |

### Histone deacetylase 1 - Homo sapiens (Human)

| Accession No. | Protein Score | Ratio(L/H) | Normalized Ratio (L/H) | STD                | Mass   | Sequence Coverage (%) | Identified Peptide      | Quantitated Peptide       | Identified Unique Peptide |        |
|---------------|---------------|------------|------------------------|--------------------|--------|-----------------------|-------------------------|---------------------------|---------------------------|--------|
| Q13547        | 175           | 2.01       | 1.66                   | 0.22               | 55068  | 11.6                  | 14                      | 5                         | 2                         |        |
| Spectrum No.  | Peptide Score | Ratio(L/H) | Normalized Ratio (L/H) | Precursor m/z (Da) | Charge | Mass Error (Da)       | Peptide Sequence        | Modification              | Labeled                   | Unique |
| 7634          | 36.58         | 1.98       | 1.63                   | 618.2670           | 2      | -0.1550               | LGCFNLTIK               | ICAT-C (C)                | YES                       | YES    |
| 7635          | 29.81         | 2.09       | 1.73                   | 618.2683           | 2      | -0.1524               | LGCFNLTIK               | ICAT-C (C)                | YES                       | YES    |
| 7896          | 28.07         | 2.00       | 1.66                   | 622.7904           | 2      | -0.1383               | LGCFNLTIK               | ICAT-C:13C(9) (C)         | YES                       | YES    |
| 50831         | 46.76         | N/A        | N/A                    | 895.0511           | 3      | -0.1136               | VMEMFQPSAVVLQCGSDSLSGDR | ICAT-C (C)                | YES                       | NO     |
| 50844         | 48.2          | N/A        | N/A                    | 895.2000           | 3      | 0.3330                | VMEMFQPSAVVLQCGSDSLSGDR | ICAT-C (C)                | YES                       | NO     |
| 51028         | 43.26         | N/A        | N/A                    | 898.0594           | 3      | -0.1189               | VMEMFQPSAVVLQCGSDSLSGDR | ICAT-C:13C(9) (C)         | YES                       | NO     |
| 51182         | 38.57         | N/A        | N/A                    | 900.3234           | 3      | -0.2917               | VMEMFQPSAVVLQCGSDSLSGDR | ICAT-C (C); Oxidation (M) | YES                       | NO     |

|       |       |     |     |          |   |         |                          |                                    |     |     |
|-------|-------|-----|-----|----------|---|---------|--------------------------|------------------------------------|-----|-----|
| 51194 | 33.38 | N/A | N/A | 900.3746 | 3 | -0.1381 | VMEMFQPSAVWLQCGSDSLSGDR  | ICAT-C (C); Oxidation (M)          | YES | NO  |
| 51212 | 43.18 | N/A | N/A | 900.5000 | 3 | 0.2381  | VMEMFQPSAVWLQCGSDSLSGDR  | ICAT-C (C); Oxidation (M)          | YES | NO  |
| 51388 | 29.43 | N/A | N/A | 903.3395 | 3 | -0.2735 | VMEMFQPSAVWLQCGSDSLSGDR  | ICAT-C:13C(9) (C); Oxidation (M)   | YES | NO  |
| 51648 | 33.29 | N/A | N/A | 908.6613 | 3 | -0.3031 | VMEMFQPSAVWLQCGSDSLSGDR  | ICAT-C:13C(9) (C); 2 Oxidation (M) | YES | NO  |
| 51649 | 36.58 | N/A | N/A | 908.6666 | 3 | -0.2873 | VMEMFQPSAVWLQCGSDSLSGDR  | ICAT-C:13C(9) (C); 2 Oxidation (M) | YES | NO  |
| 57604 | 30.74 | N/A | N/A | 782.0910 | 4 | -0.0248 | VCYYYDGDVGNYYYYQGHPMKPHR | ICAT-C (C); Oxidation (M)          | YES | YES |
| 57605 | 35.37 | N/A | N/A | 782.1185 | 4 | 0.0852  | VCYYYDGDVGNYYYYQGHPMKPHR | ICAT-C (C); Oxidation (M)          | YES | YES |

### Histone deacetylase 2 - Homo sapiens (Human)

| Accession No. | Protein Score | Ratio(L/H) | Normalized Ratio (L/H) | STD                | Mass   | Sequence Coverage (%) | Identified Peptide       | Quantitated Peptide                | Identified Unique Peptide |        |
|---------------|---------------|------------|------------------------|--------------------|--------|-----------------------|--------------------------|------------------------------------|---------------------------|--------|
| Q92769        | 164           | 2.01       | 1.66                   | 0.19               | 55329  | 11.5                  | 16                       | 8                                  | 3                         |        |
| Spectrum No.  | Peptide Score | Ratio(L/H) | Normalized Ratio (L/H) | Precursor m/z (Da) | Charge | Mass Error (Da)       | Peptide Sequence         | Modification                       | Labeled                   | Unique |
| 7223          | 30.49         | 1.74       | 1.44                   | 611.2633           | 2      | -0.1466               | LGCFNLTVK                | ICAT-C (C)                         | YES                       | YES    |
| 7227          | 32.33         | 2.26       | 1.86                   | 611.2705           | 2      | -0.1322               | LGCFNLTVK                | ICAT-C (C)                         | YES                       | YES    |
| 7236          | 34.14         | N/A        | N/A                    | 611.2998           | 2      | -0.0737               | LGCFNLTVK                | ICAT-C (C)                         | YES                       | YES    |
| 7241          | 28.93         | N/A        | N/A                    | 611.3275           | 2      | -0.0184               | LGCFNLTVK                | ICAT-C (C)                         | YES                       | YES    |
| 50822         | 31.92         | N/A        | N/A                    | 894.9871           | 3      | -0.3056               | VMEMYQPSAVWLQCGADSLSGDR  | ICAT-C (C)                         | YES                       | YES    |
| 50829         | 49.48         | 1.94       | 1.60                   | 895.0454           | 3      | -0.1309               | VMEMYQPSAVWLQCGADSLSGDR  | ICAT-C (C)                         | YES                       | YES    |
| 51180         | 28.81         | 2.12       | 1.75                   | 900.3209           | 3      | -0.2993               | VMEMYQPSAVWLQCGADSLSGDR  | ICAT-C (C); Oxidation (M)          | YES                       | YES    |
| 51182         | 27.59         | N/A        | N/A                    | 900.3234           | 3      | -0.2916               | VMEMYQPSAVWLQCGADSLSGDR  | ICAT-C (C); Oxidation (M)          | YES                       | NO     |
| 51389         | 25.18         | N/A        | N/A                    | 903.3837           | 3      | -0.1409               | VMEMYQPSAVWLQCGADSLSGDR  | ICAT-C:13C(9) (C); Oxidation (M)   | YES                       | YES    |
| 51493         | 29.18         | N/A        | N/A                    | 905.6507           | 3      | -0.3048               | VMEMYQPSAVWLQCGADSLSGDR  | ICAT-C (C); 2 Oxidation (M)        | YES                       | YES    |
| 51498         | 33.87         | N/A        | N/A                    | 905.6917           | 3      | -0.1816               | VMEMYQPSAVWLQCGADSLSGDR  | ICAT-C (C); 2 Oxidation (M)        | YES                       | YES    |
| 51499         | 50.75         | 2.32       | 1.92                   | 905.7268           | 3      | -0.0764               | VMEMYQPSAVWLQCGADSLSGDR  | ICAT-C (C); 2 Oxidation (M)        | YES                       | YES    |
| 51651         | 31.36         | N/A        | N/A                    | 908.7013           | 3      | -0.1832               | VMEMYQPSAVWLQCGADSLSGDR  | ICAT-C:13C(9) (C); 2 Oxidation (M) | YES                       | YES    |
| 51653         | 46.46         | 2.20       | 1.81                   | 908.7087           | 3      | -0.1608               | VMEMYQPSAVWLQCGADSLSGDR  | ICAT-C:13C(9) (C); 2 Oxidation (M) | YES                       | YES    |
| 57718         | 30.52         | 2.03       | 1.68                   | 785.5979           | 4      | -0.0127               | VCYYYDGDIGNYYYYQGHPMKPHR | ICAT-C (C); Oxidation (M)          | YES                       | YES    |
| 57773         | 30.63         | 1.96       | 1.62                   | 787.8524           | 4      | -0.0250               | VCYYYDGDIGNYYYYQGHPMKPHR | ICAT-C:13C(9) (C); Oxidation (M)   | YES                       | YES    |

### DNA damage response proteins

#### DNA-(apurinic or apyrimidinic site) lyase - Homo sapiens (Human)

| Accession No. | Protein Score | Ratio(L/H) | Normalized Ratio (L/H) | STD                | Mass   | Sequence Coverage (%) | Identified Peptide | Quantitated Peptide | Identified Unique Peptide |        |
|---------------|---------------|------------|------------------------|--------------------|--------|-----------------------|--------------------|---------------------|---------------------------|--------|
| P27695        | 766           | 9.80       | 8.10                   | 3.21               | 35532  | 21.7                  | 33                 | 25                  | 6                         |        |
| Spectrum No.  | Peptide Score | Ratio(L/H) | Normalized Ratio (L/H) | Precursor m/z (Da) | Charge | Mass Error (Da)       | Peptide Sequence   | Modification        | Labeled                   | Unique |
| 12460         | 55.87         | 11.28      | 9.32                   | 695.2865           | 2      | -0.1286               | ICSWNV DGLR        | ICAT-C (C)          | YES                       | YES    |
| 12493         | 28.99         | 13.38      | 11.05                  | 695.3631           | 2      | 0.0245                | ICSWNV DGLR        | ICAT-C (C)          | YES                       | YES    |
| 13123         | 29.4          | 14.64      | 12.09                  | 699.8811           | 2      | 0.0304                | ICSWNV DGLR        | ICAT-C:13C(9) (C)   | YES                       | YES    |
| 25076         | 31.35         | N/A        | N/A                    | 858.3176           | 2      | -0.2240               | EEAPDILCLQETK      | ICAT-C (C)          | YES                       | YES    |
| 25083         | 51.62         | 12.14      | 10.02                  | 858.3791           | 2      | -0.1012               | EEAPDILCLQETK      | ICAT-C (C)          | YES                       | YES    |

|       |       |       |       |           |   |         |                        |                   |     |     |
|-------|-------|-------|-------|-----------|---|---------|------------------------|-------------------|-----|-----|
| 25084 | 41.21 | 14.40 | 11.90 | 858.3851  | 2 | -0.0890 | EEAPDILCLQETK          | ICAT-C (C)        | YES | YES |
| 25085 | 49.88 | N/A   | N/A   | 858.3890  | 2 | -0.0813 | EEAPDILCLQETK          | ICAT-C (C)        | YES | YES |
| 42640 | 34.33 | 10.07 | 8.32  | 754.8000  | 3 | 0.2016  | LDYFLLSHSLLPALCDSK     | ICAT-C (C)        | YES | YES |
| 42644 | 30.17 | 10.65 | 8.80  | 754.9000  | 3 | 0.5016  | LDYFLLSHSLLPALCDSK     | ICAT-C (C)        | YES | YES |
| 42647 | 47.7  | 8.99  | 7.42  | 1131.9000 | 2 | 0.6089  | LDYFLLSHSLLPALCDSK     | ICAT-C (C)        | YES | YES |
| 44582 | 36.26 | N/A   | N/A   | 590.9866  | 4 | -0.3347 | KPLVLCGDLNVAHEEIDLR    | ICAT-C (C)        | YES | YES |
| 44593 | 88.3  | 8.84  | 7.30  | 787.7553  | 3 | -0.0081 | KPLVLCGDLNVAHEEIDLR    | ICAT-C (C)        | YES | YES |
| 44594 | 35.51 | N/A   | N/A   | 787.7568  | 3 | -0.0036 | KPLVLCGDLNVAHEEIDLR    | ICAT-C (C)        | YES | YES |
| 44596 | 34.67 | N/A   | N/A   | 787.7583  | 3 | 0.0010  | KPLVLCGDLNVAHEEIDLR    | ICAT-C (C)        | YES | YES |
| 44597 | 43.42 | N/A   | N/A   | 787.7591  | 3 | 0.0033  | KPLVLCGDLNVAHEEIDLR    | ICAT-C (C)        | YES | YES |
| 44598 | 34.25 | N/A   | N/A   | 591.0773  | 4 | 0.0278  | KPLVLCGDLNVAHEEIDLR    | ICAT-C (C)        | YES | YES |
| 44601 | 30.42 | 9.41  | 7.78  | 591.0795  | 4 | 0.0367  | KPLVLCGDLNVAHEEIDLR    | ICAT-C (C)        | YES | YES |
| 44604 | 40.47 | 8.57  | 7.08  | 591.1000  | 4 | 0.1187  | KPLVLCGDLNVAHEEIDLR    | ICAT-C (C)        | YES | YES |
| 44796 | 44.87 | 9.04  | 7.46  | 790.7657  | 3 | -0.0073 | KPLVLCGDLNVAHEEIDLR    | ICAT-C:13C(9) (C) | YES | YES |
| 44797 | 44.78 | 8.60  | 7.11  | 593.3275  | 4 | -0.0016 | KPLVLCGDLNVAHEEIDLR    | ICAT-C:13C(9) (C) | YES | YES |
| 45689 | 29.49 | 18.74 | 15.48 | 805.3345  | 3 | -0.2383 | GLDWVKEEAPDILCLQETK    | ICAT-C (C)        | YES | YES |
| 45701 | 41.44 | 8.46  | 6.99  | 805.6000  | 3 | 0.5583  | GLDWVKEEAPDILCLQETK    | ICAT-C (C)        | YES | YES |
| 51225 | 38.63 | 13.73 | 11.34 | 675.7762  | 4 | -0.3670 | KPLVLCGDLNVAHEEIDLRNPK | ICAT-C (C)        | YES | YES |
| 51244 | 35.88 | N/A   | N/A   | 675.8533  | 4 | -0.0587 | KPLVLCGDLNVAHEEIDLRNPK | ICAT-C (C)        | YES | YES |
| 51246 | 28.87 | 11.25 | 9.30  | 675.8595  | 4 | -0.0340 | KPLVLCGDLNVAHEEIDLRNPK | ICAT-C (C)        | YES | YES |
| 51247 | 72.3  | 10.31 | 8.51  | 900.8119  | 3 | -0.0291 | KPLVLCGDLNVAHEEIDLRNPK | ICAT-C (C)        | YES | YES |
| 51250 | 45.73 | 10.27 | 8.49  | 675.8823  | 4 | 0.0571  | KPLVLCGDLNVAHEEIDLRNPK | ICAT-C (C)        | YES | YES |
| 51253 | 70.29 | 9.90  | 8.18  | 675.9000  | 4 | 0.1281  | KPLVLCGDLNVAHEEIDLRNPK | ICAT-C (C)        | YES | YES |
| 51263 | 47.31 | 21.71 | 17.93 | 676.0000  | 4 | 0.5281  | KPLVLCGDLNVAHEEIDLRNPK | ICAT-C (C)        | YES | YES |
| 51265 | 40.79 | 10.13 | 8.37  | 901.0000  | 3 | 0.5353  | KPLVLCGDLNVAHEEIDLRNPK | ICAT-C (C)        | YES | YES |
| 51410 | 35.24 | 11.09 | 9.16  | 678.1202  | 4 | -0.0215 | KPLVLCGDLNVAHEEIDLRNPK | ICAT-C:13C(9) (C) | YES | YES |
| 51411 | 50.38 | 10.47 | 8.65  | 678.1221  | 4 | -0.0136 | KPLVLCGDLNVAHEEIDLRNPK | ICAT-C:13C(9) (C) | YES | YES |
| 51415 | 50.67 | 10.26 | 8.47  | 678.1349  | 4 | 0.0376  | KPLVLCGDLNVAHEEIDLRNPK | ICAT-C:13C(9) (C) | YES | YES |

### Telomeric repeat-binding factor 2-interacting protein 1 - Homo sapiens (Human)

| Accession No. | Protein Score | Ratio(L/H) | Normalized Ratio (L/H) | STD                | Mass   | Sequence Coverage (%) | Identified Peptide | Quantitated Peptide | Identified Unique Peptide |        |
|---------------|---------------|------------|------------------------|--------------------|--------|-----------------------|--------------------|---------------------|---------------------------|--------|
| Q9NYB0        | 66            | 6.94       | 5.73                   | 2.57               | 44233  | 3.5                   | 3                  | 3                   | 1                         |        |
| Spectrum No.  | Peptide Score | Ratio(L/H) | Normalized Ratio (L/H) | Precursor m/z (Da) | Charge | Mass Error (Da)       | Peptide Sequence   | Modification        | Labeled                   | Unique |
| 23181         | 35.74         | 7.23       | 5.97                   | 551.9749           | 3      | -0.0003               | LSTLILHGGGTVCR     | ICAT-C (C)          | YES                       | YES    |
| 23184         | 49.11         | 8.08       | 6.67                   | 551.9813           | 3      | 0.0187                | LSTLILHGGGTVCR     | ICAT-C (C)          | YES                       | YES    |
| 23186         | 37.18         | 3.26       | 2.70                   | 551.9827           | 3      | 0.0231                | LSTLILHGGGTVCR     | ICAT-C (C)          | YES                       | YES    |

### High mobility group protein B3 - Homo sapiens (Human)

| Accession No. | Protein Score | Ratio(L/H) | Normalized Ratio (L/H) | STD  | Mass  | Sequence Coverage (%) | Identified Peptide | Quantitated Peptide | Identified Unique Peptide |
|---------------|---------------|------------|------------------------|------|-------|-----------------------|--------------------|---------------------|---------------------------|
| O15347        | 85            | 6.68       | 5.51                   | 0.32 | 22965 | 14.0                  | 8                  | 2                   | 1                         |



| Spectrum No. | Peptide Score | Ratio(L/H) | Normalized Ratio (L/H) | Precursor <i>m/z</i> (Da) | Charge | Mass Error (Da) | Peptide Sequence | Modification              | Labeled | Unique |
|--------------|---------------|------------|------------------------|---------------------------|--------|-----------------|------------------|---------------------------|---------|--------|
| 23619        | 35.13         | N/A        | N/A                    | 833.8023                  | 2      | -0.1743         | MSAYAFFVQTCR     | ICAT-C (C); Oxidation (M) | YES     | NO     |
| 23621        | 25.51         | N/A        | N/A                    | 833.8088                  | 2      | -0.1613         | MSAYAFFVQTCR     | ICAT-C (C); Oxidation (M) | YES     | NO     |
| 23623        | 34.23         | N/A        | N/A                    | 833.8218                  | 2      | -0.1352         | MSAYAFFVQTCR     | ICAT-C (C); Oxidation (M) | YES     | NO     |
| 23637        | 27.41         | N/A        | N/A                    | 833.9079                  | 2      | 0.0369          | MSAYAFFVQTCR     | ICAT-C (C); Oxidation (M) | YES     | NO     |
| 23639        | 25.4          | N/A        | N/A                    | 833.9141                  | 2      | 0.0493          | MSAYAFFVQTCR     | ICAT-C (C); Oxidation (M) | YES     | NO     |
| 23655        | 39.16         | N/A        | N/A                    | 833.9957                  | 2      | 0.2125          | MSAYAFFVQTCR     | ICAT-C (C); Oxidation (M) | YES     | NO     |
| 39438        | 28.62         | 6.43       | 5.31                   | 714.7040                  | 3      | 0.0023          | RPPSGFFLFCSEFRPK | ICAT-C (C)                | YES     | YES    |
| 39656        | 29.3          | 6.88       | 5.69                   | 717.7006                  | 3      | -0.0382         | RPPSGFFLFCSEFRPK | ICAT-C:13C(9) (C)         | YES     | YES    |

### DNA topoisomerase 2-binding protein 1 - Homo sapiens (Human)

| Accession No. | Protein Score | Ratio(L/H) | Normalized Ratio (L/H) | STD | Mass   | Sequence Coverage (%) | Identified Peptide | Quantitated Peptide | Identified Unique Peptide |
|---------------|---------------|------------|------------------------|-----|--------|-----------------------|--------------------|---------------------|---------------------------|
| Q92547        | 40            | 3.35       | 2.77                   | N/A | 170571 | 1.4                   | 1                  | 1                   | 1                         |

  

| Spectrum No. | Peptide Score | Ratio(L/H) | Normalized Ratio (L/H) | Precursor <i>m/z</i> (Da) | Charge | Mass Error (Da) | Peptide Sequence       | Modification | Labeled | Unique |
|--------------|---------------|------------|------------------------|---------------------------|--------|-----------------|------------------------|--------------|---------|--------|
| 48917        | 39.79         | 3.35       | 2.77                   | 858.7750                  | 3      | 0.0124          | LKPDDSGVNIAEAAAQNVYCLR | ICAT-C (C)   | YES     | YES    |

### Mediator of DNA damage checkpoint protein 1 - Homo sapiens (Human)

| Accession No. | Protein Score | Ratio(L/H) | Normalized Ratio (L/H) | STD  | Mass   | Sequence Coverage (%) | Identified Peptide | Quantitated Peptide | Identified Unique Peptide |
|---------------|---------------|------------|------------------------|------|--------|-----------------------|--------------------|---------------------|---------------------------|
| Q14676        | 278           | 2.32       | 1.92                   | 1.35 | 226529 | 3.9                   | 18                 | 16                  | 3                         |

  

| Spectrum No. | Peptide Score | Ratio(L/H) | Normalized Ratio (L/H) | Precursor <i>m/z</i> (Da) | Charge | Mass Error (Da) | Peptide Sequence                  | Modification        | Labeled | Unique |
|--------------|---------------|------------|------------------------|---------------------------|--------|-----------------|-----------------------------------|---------------------|---------|--------|
| 28172        | 34.24         | N/A        | N/A                    | 909.8387                  | 2      | -0.2427         | MPDCSVALPFPSISK                   | ICAT-C (C)          | YES     | YES    |
| 28175        | 42.74         | 4.67       | 3.86                   | 909.8534                  | 2      | -0.2133         | MPDCSVALPFPSISK                   | ICAT-C (C)          | YES     | YES    |
| 28178        | 26.34         | 4.56       | 3.77                   | 909.9153                  | 2      | -0.0895         | MPDCSVALPFPSISK                   | ICAT-C (C)          | YES     | YES    |
| 28181        | 44.58         | 5.88       | 4.86                   | 909.9363                  | 2      | -0.0476         | MPDCSVALPFPSISK                   | ICAT-C (C)          | YES     | YES    |
| 28750        | 33.38         | N/A        | N/A                    | 612.3452                  | 3      | 0.0321          | DCGSLNGTQILRPPK                   | ICAT-C:13C(9) (C)   | YES     | YES    |
| 44992        | 31.74         | 3.32       | 2.74                   | 793.6778                  | 3      | -0.2123         | VVITCPQDFPHCSIPLR                 | 2 ICAT-C (C)        | YES     | YES    |
| 44993        | 25.16         | 2.04       | 1.68                   | 793.6825                  | 3      | -0.1982         | VVITCPQDFPHCSIPLR                 | 2 ICAT-C (C)        | YES     | YES    |
| 44994        | 36.77         | 1.98       | 1.63                   | 793.6841                  | 3      | -0.1935         | VVITCPQDFPHCSIPLR                 | 2 ICAT-C (C)        | YES     | YES    |
| 44997        | 28.69         | 2.08       | 1.71                   | 793.7362                  | 3      | -0.0371         | VVITCPQDFPHCSIPLR                 | 2 ICAT-C (C)        | YES     | YES    |
| 45000        | 28.03         | 2.25       | 1.86                   | 793.7555                  | 3      | 0.0207          | VVITCPQDFPHCSIPLR                 | 2 ICAT-C (C)        | YES     | YES    |
| 45001        | 36.01         | 2.25       | 1.86                   | 793.7756                  | 3      | 0.0810          | VVITCPQDFPHCSIPLR                 | 2 ICAT-C (C)        | YES     | YES    |
| 45002        | 29.07         | 2.32       | 1.92                   | 793.7845                  | 3      | 0.1077          | VVITCPQDFPHCSIPLR                 | 2 ICAT-C (C)        | YES     | YES    |
| 45380        | 29.1          | 2.11       | 1.75                   | 799.6981                  | 3      | -0.2119         | VVITCPQDFPHCSIPLR                 | 2 ICAT-C:13C(9) (C) | YES     | YES    |
| 45382        | 28.94         | 1.93       | 1.59                   | 799.7071                  | 3      | -0.1849         | VVITCPQDFPHCSIPLR                 | 2 ICAT-C:13C(9) (C) | YES     | YES    |
| 45387        | 28.32         | 2.23       | 1.84                   | 799.7513                  | 3      | -0.0522         | VVITCPQDFPHCSIPLR                 | 2 ICAT-C:13C(9) (C) | YES     | YES    |
| 45395        | 34.45         | 2.26       | 1.87                   | 799.7999                  | 3      | 0.0937          | VVITCPQDFPHCSIPLR                 | 2 ICAT-C:13C(9) (C) | YES     | YES    |
| 45397        | 41.27         | 2.41       | 1.99                   | 799.8042                  | 3      | 0.1064          | VVITCPQDFPHCSIPLR                 | 2 ICAT-C:13C(9) (C) | YES     | YES    |
| 60585        | 38.3          | 5.46       | 4.51                   | 949.7116                  | 4      | -0.0723         | VSRGDQESPDACLPTVPEAPAPPQKPLNSQSQK | ICAT-C (C)          | YES     | YES    |

### High mobility group protein B2 - Homo sapiens (Human)

| Accession No. | Protein Score | Ratio(L/H) | Normalized Ratio (L/H) | STD                       | Mass   | Sequence Coverage (%) | Identified Peptide | Quantitated Peptide              | Identified Unique Peptide |        |
|---------------|---------------|------------|------------------------|---------------------------|--------|-----------------------|--------------------|----------------------------------|---------------------------|--------|
| P26583        | 497           | 12.11      | 10.01                  | N/A                       | 24019  | 13.4                  | 22                 | 1                                | 1                         |        |
| Spectrum No.  | Peptide Score | Ratio(L/H) | Normalized Ratio (L/H) | Precursor <i>m/z</i> (Da) | Charge | Mass Error (Da)       | Peptide Sequence   | Modification                     | Labeled                   | Unique |
| 23619         | 35.48         | N/A        | N/A                    | 833.8023                  | 2      | -0.1743               | MSSYAFFVQTCR       | ICAT-C (C)                       | YES                       | NO     |
| 23621         | 25.51         | N/A        | N/A                    | 833.8088                  | 2      | -0.1613               | MSSYAFFVQTCR       | ICAT-C (C)                       | YES                       | NO     |
| 23623         | 32.97         | N/A        | N/A                    | 833.8218                  | 2      | -0.1352               | MSSYAFFVQTCR       | ICAT-C (C)                       | YES                       | NO     |
| 23637         | 27.92         | N/A        | N/A                    | 833.9079                  | 2      | 0.0369                | MSSYAFFVQTCR       | ICAT-C (C)                       | YES                       | NO     |
| 23639         | 25.4          | N/A        | N/A                    | 833.9141                  | 2      | 0.0493                | MSSYAFFVQTCR       | ICAT-C (C)                       | YES                       | NO     |
| 23655         | 32.85         | N/A        | N/A                    | 833.9957                  | 2      | 0.2125                | MSSYAFFVQTCR       | ICAT-C (C)                       | YES                       | NO     |
| 24074         | 69.23         | N/A        | N/A                    | 841.7971                  | 2      | -0.1796               | MSSYAFFVQTCR       | ICAT-C (C); Oxidation (M)        | YES                       | NO     |
| 24076         | 57.08         | N/A        | N/A                    | 841.8104                  | 2      | -0.1529               | MSSYAFFVQTCR       | ICAT-C (C); Oxidation (M)        | YES                       | NO     |
| 24077         | 80.37         | N/A        | N/A                    | 841.8113                  | 2      | -0.1512               | MSSYAFFVQTCR       | ICAT-C (C); Oxidation (M)        | YES                       | NO     |
| 24078         | 50.55         | N/A        | N/A                    | 841.8201                  | 2      | -0.1337               | MSSYAFFVQTCR       | ICAT-C (C); Oxidation (M)        | YES                       | NO     |
| 24079         | 31.71         | N/A        | N/A                    | 841.8586                  | 2      | -0.0566               | MSSYAFFVQTCR       | ICAT-C (C); Oxidation (M)        | YES                       | NO     |
| 24080         | 35.05         | N/A        | N/A                    | 841.8611                  | 2      | -0.0516               | MSSYAFFVQTCR       | ICAT-C (C); Oxidation (M)        | YES                       | NO     |
| 24082         | 32.22         | N/A        | N/A                    | 841.8913                  | 2      | 0.0088                | MSSYAFFVQTCR       | ICAT-C (C); Oxidation (M)        | YES                       | NO     |
| 24100         | 39.78         | N/A        | N/A                    | 841.9819                  | 2      | 0.1900                | MSSYAFFVQTCR       | ICAT-C (C); Oxidation (M)        | YES                       | NO     |
| 24101         | 77.81         | N/A        | N/A                    | 841.9830                  | 2      | 0.1922                | MSSYAFFVQTCR       | ICAT-C (C); Oxidation (M)        | YES                       | NO     |
| 24103         | 80.64         | N/A        | N/A                    | 842.1000                  | 2      | 0.4262                | MSSYAFFVQTCR       | ICAT-C (C); Oxidation (M)        | YES                       | NO     |
| 24104         | 46.66         | N/A        | N/A                    | 842.1000                  | 2      | 0.4262                | MSSYAFFVQTCR       | ICAT-C (C); Oxidation (M)        | YES                       | NO     |
| 24337         | 38.82         | N/A        | N/A                    | 846.3261                  | 2      | -0.1517               | MSSYAFFVQTCR       | ICAT-C:13C(9) (C); Oxidation (M) | YES                       | NO     |
| 24338         | 30.46         | N/A        | N/A                    | 846.3313                  | 2      | -0.1414               | MSSYAFFVQTCR       | ICAT-C:13C(9) (C); Oxidation (M) | YES                       | NO     |
| 24359         | 32.32         | N/A        | N/A                    | 846.4975                  | 2      | 0.1910                | MSSYAFFVQTCR       | ICAT-C:13C(9) (C); Oxidation (M) | YES                       | NO     |
| 39557         | 28.58         | 12.11      | 10.01                  | 537.2821                  | 4      | 0.0053                | RPPSAFFLFCSEHRPK   | ICAT-C (C)                       | YES                       | YES    |
| 39560         | 26.48         | N/A        | N/A                    | 537.2929                  | 4      | 0.0485                | RPPSAFFLFCSEHRPK   | ICAT-C (C)                       | YES                       | YES    |

### High mobility group protein B1 - Homo sapiens (Human)

| Accession No. | Protein Score | Ratio(L/H) | Normalized Ratio (L/H) | STD                       | Mass   | Sequence Coverage (%) | Identified Peptide | Quantitated Peptide | Identified Unique Peptide |        |
|---------------|---------------|------------|------------------------|---------------------------|--------|-----------------------|--------------------|---------------------|---------------------------|--------|
| P09429        | 603           | 6.50       | 5.37                   | 0.48                      | 24878  | 13.0                  | 30                 | 9                   | 1                         |        |
| Spectrum No.  | Peptide Score | Ratio(L/H) | Normalized Ratio (L/H) | Precursor <i>m/z</i> (Da) | Charge | Mass Error (Da)       | Peptide Sequence   | Modification        | Labeled                   | Unique |
| 23619         | 35.48         | N/A        | N/A                    | 833.8023                  | 2      | -0.1743               | MSSYAFFVQTCR       | ICAT-C (C)          | YES                       | NO     |
| 23621         | 25.51         | N/A        | N/A                    | 833.8088                  | 2      | -0.1613               | MSSYAFFVQTCR       | ICAT-C (C)          | YES                       | NO     |
| 23623         | 32.97         | N/A        | N/A                    | 833.8218                  | 2      | -0.1352               | MSSYAFFVQTCR       | ICAT-C (C)          | YES                       | NO     |
| 23637         | 27.92         | N/A        | N/A                    | 833.9079                  | 2      | 0.0369                | MSSYAFFVQTCR       | ICAT-C (C)          | YES                       | NO     |
| 23639         | 25.4          | N/A        | N/A                    | 833.9141                  | 2      | 0.0493                | MSSYAFFVQTCR       | ICAT-C (C)          | YES                       | NO     |

|       |       |      |      |          |   |         |                  |                                  |     |     |
|-------|-------|------|------|----------|---|---------|------------------|----------------------------------|-----|-----|
| 23655 | 32.85 | N/A  | N/A  | 833.9957 | 2 | 0.2125  | MSSYAFFVQTCR     | ICAT-C (C)                       | YES | NO  |
| 24074 | 69.23 | N/A  | N/A  | 841.7971 | 2 | -0.1796 | MSSYAFFVQTCR     | ICAT-C (C); Oxidation (M)        | YES | NO  |
| 24076 | 57.08 | N/A  | N/A  | 841.8104 | 2 | -0.1529 | MSSYAFFVQTCR     | ICAT-C (C); Oxidation (M)        | YES | NO  |
| 24077 | 80.37 | N/A  | N/A  | 841.8113 | 2 | -0.1512 | MSSYAFFVQTCR     | ICAT-C (C); Oxidation (M)        | YES | NO  |
| 24078 | 50.55 | N/A  | N/A  | 841.8201 | 2 | -0.1337 | MSSYAFFVQTCR     | ICAT-C (C); Oxidation (M)        | YES | NO  |
| 24079 | 31.71 | N/A  | N/A  | 841.8586 | 2 | -0.0566 | MSSYAFFVQTCR     | ICAT-C (C); Oxidation (M)        | YES | NO  |
| 24080 | 35.05 | N/A  | N/A  | 841.8611 | 2 | -0.0516 | MSSYAFFVQTCR     | ICAT-C (C); Oxidation (M)        | YES | NO  |
| 24082 | 32.22 | N/A  | N/A  | 841.8913 | 2 | 0.0088  | MSSYAFFVQTCR     | ICAT-C (C); Oxidation (M)        | YES | NO  |
| 24100 | 39.78 | N/A  | N/A  | 841.9819 | 2 | 0.1900  | MSSYAFFVQTCR     | ICAT-C (C); Oxidation (M)        | YES | NO  |
| 24101 | 77.81 | N/A  | N/A  | 841.9830 | 2 | 0.1922  | MSSYAFFVQTCR     | ICAT-C (C); Oxidation (M)        | YES | NO  |
| 24103 | 80.64 | N/A  | N/A  | 842.1000 | 2 | 0.4262  | MSSYAFFVQTCR     | ICAT-C (C); Oxidation (M)        | YES | NO  |
| 24104 | 46.66 | N/A  | N/A  | 842.1000 | 2 | 0.4262  | MSSYAFFVQTCR     | ICAT-C (C); Oxidation (M)        | YES | NO  |
| 24337 | 38.82 | N/A  | N/A  | 846.3261 | 2 | -0.1517 | MSSYAFFVQTCR     | ICAT-C:13C(9) (C); Oxidation (M) | YES | NO  |
| 24338 | 30.46 | N/A  | N/A  | 846.3313 | 2 | -0.1414 | MSSYAFFVQTCR     | ICAT-C:13C(9) (C); Oxidation (M) | YES | NO  |
| 24359 | 32.32 | N/A  | N/A  | 846.4975 | 2 | 0.1910  | MSSYAFFVQTCR     | ICAT-C:13C(9) (C); Oxidation (M) | YES | NO  |
| 40237 | 38.11 | 7.18 | 5.93 | 724.6235 | 3 | -0.2498 | RPPSAFFLFCSEYRPK | ICAT-C (C)                       | YES | YES |
| 40245 | 33.92 | 6.17 | 5.10 | 724.6981 | 3 | -0.0260 | RPPSAFFLFCSEYRPK | ICAT-C (C)                       | YES | YES |
| 40258 | 28.15 | 7.19 | 5.94 | 724.7183 | 3 | 0.0345  | RPPSAFFLFCSEYRPK | ICAT-C (C)                       | YES | YES |
| 40262 | 30.69 | N/A  | N/A  | 724.7249 | 3 | 0.0543  | RPPSAFFLFCSEYRPK | ICAT-C (C)                       | YES | YES |
| 40271 | 40.38 | 6.26 | 5.17 | 724.9000 | 3 | 0.5796  | RPPSAFFLFCSEYRPK | ICAT-C (C)                       | YES | YES |
| 40273 | 36.95 | 6.88 | 5.68 | 724.9000 | 3 | 0.5796  | RPPSAFFLFCSEYRPK | ICAT-C (C)                       | YES | YES |
| 40481 | 34.16 | 7.15 | 5.91 | 727.6247 | 3 | -0.2764 | RPPSAFFLFCSEYRPK | ICAT-C:13C(9) (C)                | YES | YES |
| 40489 | 33.43 | 6.09 | 5.03 | 727.7011 | 3 | -0.0474 | RPPSAFFLFCSEYRPK | ICAT-C:13C(9) (C)                | YES | YES |
| 40500 | 30.12 | 6.18 | 5.11 | 727.7350 | 3 | 0.0543  | RPPSAFFLFCSEYRPK | ICAT-C:13C(9) (C)                | YES | YES |
| 40502 | 30.21 | 6.86 | 5.67 | 727.7383 | 3 | 0.0644  | RPPSAFFLFCSEYRPK | ICAT-C:13C(9) (C)                | YES | YES |

### DNA polymerase epsilon subunit 2 - Homo sapiens (Human)

| Accession No. | Protein Score | Ratio(L/H) | Normalized Ratio (L/H) | STD                | Mass   | Sequence Coverage (%) | Identified Peptide | Quantitated Peptide | Identified Unique Peptide |        |  |
|---------------|---------------|------------|------------------------|--------------------|--------|-----------------------|--------------------|---------------------|---------------------------|--------|--|
| P56282        | 34            | 10.49      | 8.66                   | N/A                | 59499  | 3.2                   | 2                  | 1                   | 1                         |        |  |
| Spectrum No.  | Peptide Score | Ratio(L/H) | Normalized Ratio (L/H) | Precursor m/z (Da) | Charge | Mass Error (Da)       | Peptide Sequence   | Modification        | Labeled                   | Unique |  |
| 40675         | 30.38         | 10.49      | 8.66                   | 730.0246           | 3      | -0.0110               | TLADIICEYPDIHQSSR  | ICAT-C (C)          | YES                       | YES    |  |
| 40679         | 28.04         | N/A        | N/A                    | 730.0464           | 3      | 0.0543                | TLADIICEYPDIHQSSR  | ICAT-C (C)          | YES                       | YES    |  |

### Proliferating cell nuclear antigen - Homo sapiens (Human)

| Accession No. | Protein Score | Ratio(L/H) | Normalized Ratio (L/H) | STD                | Mass   | Sequence Coverage (%) | Identified Peptide | Quantitated Peptide | Identified Unique Peptide |        |  |
|---------------|---------------|------------|------------------------|--------------------|--------|-----------------------|--------------------|---------------------|---------------------------|--------|--|
| P12004        | 202           | 3.77       | 3.12                   | 1.43               | 28750  | 18.0                  | 14                 | 8                   | 3                         |        |  |
| Spectrum No.  | Peptide Score | Ratio(L/H) | Normalized Ratio (L/H) | Precursor m/z (Da) | Charge | Mass Error (Da)       | Peptide Sequence   | Modification        | Labeled                   | Unique |  |

|       |       |      |      |          |   |         |                       |                           |     |     |
|-------|-------|------|------|----------|---|---------|-----------------------|---------------------------|-----|-----|
| 14913 | 61.61 | 3.26 | 2.69 | 716.2879 | 2 | -0.1574 | CAGNEDIITLR           | ICAT-C (C)                | YES | YES |
| 14916 | 29.19 | N/A  | N/A  | 716.2908 | 2 | -0.1518 | CAGNEDIITLR           | ICAT-C (C)                | YES | YES |
| 14939 | 26.71 | 2.59 | 2.14 | 716.3561 | 2 | -0.0210 | CAGNEDIITLR           | ICAT-C (C)                | YES | YES |
| 14942 | 36.16 | 4.29 | 3.54 | 716.3618 | 2 | -0.0096 | CAGNEDIITLR           | ICAT-C (C)                | YES | YES |
| 26104 | 27.93 | N/A  | N/A  | 877.8591 | 2 | -0.1995 | DLSHIGDAVVISCAK       | ICAT-C (C)                | YES | YES |
| 26129 | 27.17 | 6.67 | 5.51 | 585.6487 | 3 | 0.0209  | DLSHIGDAVVISCAK       | ICAT-C (C)                | YES | YES |
| 26130 | 40.17 | N/A  | N/A  | 585.6513 | 3 | 0.0288  | DLSHIGDAVVISCAK       | ICAT-C (C)                | YES | YES |
| 26131 | 43.36 | 4.93 | 4.07 | 585.6529 | 3 | 0.0335  | DLSHIGDAVVISCAK       | ICAT-C (C)                | YES | YES |
| 26132 | 37.09 | N/A  | N/A  | 585.6581 | 3 | 0.0493  | DLSHIGDAVVISCAK       | ICAT-C (C)                | YES | YES |
| 26133 | 40.29 | 2.87 | 2.37 | 878.1000 | 2 | 0.2822  | DLSHIGDAVVISCAK       | ICAT-C (C)                | YES | YES |
| 50159 | 30.12 | N/A  | N/A  | 884.3155 | 3 | -0.3625 | LMDLDVEQLGIPEQEYSCVVK | ICAT-C (C); Oxidation (M) | YES | YES |
| 50167 | 28.63 | 5.26 | 4.35 | 884.3871 | 3 | -0.1476 | LMDLDVEQLGIPEQEYSCVVK | ICAT-C (C); Oxidation (M) | YES | YES |
| 50169 | 36.01 | 5.53 | 4.57 | 884.3983 | 3 | -0.1138 | LMDLDVEQLGIPEQEYSCVVK | ICAT-C (C); Oxidation (M) | YES | YES |
| 50178 | 30.94 | N/A  | N/A  | 884.6000 | 3 | 0.4912  | LMDLDVEQLGIPEQEYSCVVK | ICAT-C (C); Oxidation (M) | YES | YES |

### Poly [ADP-ribose] polymerase 2 - Homo sapiens (Human)

| Accession No. | Protein Score | Ratio(L/H) | Normalized Ratio (L/H) | STD                       | Mass   | Sequence Coverage (%) | Identified Peptide | Quantitated Peptide       | Identified Unique Peptide |        |  |
|---------------|---------------|------------|------------------------|---------------------------|--------|-----------------------|--------------------|---------------------------|---------------------------|--------|--|
| Q9UGN5        | 45            | 2.09       | 1.73                   | 0.11                      | 66164  | 2.1                   | 2                  | 2                         | 1                         |        |  |
| Spectrum No.  | Peptide Score | Ratio(L/H) | Normalized Ratio (L/H) | Precursor <i>m/z</i> (Da) | Charge | Mass Error (Da)       | Peptide Sequence   | Modification              | Labeled                   | Unique |  |
| 24291         | 29.97         | 2.02       | 1.67                   | 845.8025                  | 2      | -0.1587               | ALMEACNEFYTR       | ICAT-C (C); Oxidation (M) | YES                       | YES    |  |
| 24310         | 36.17         | 2.18       | 1.80                   | 845.8951                  | 2      | 0.0267                | ALMEACNEFYTR       | ICAT-C (C); Oxidation (M) | YES                       | YES    |  |

### Others

#### Coiled-coil domain-containing protein 95 - Homo sapiens (Human)

| Accession No. | Protein Score | Ratio(L/H) | Normalized Ratio (L/H) | STD                       | Mass   | Sequence Coverage (%) | Identified Peptide  | Quantitated Peptide       | Identified Unique Peptide |        |  |
|---------------|---------------|------------|------------------------|---------------------------|--------|-----------------------|---------------------|---------------------------|---------------------------|--------|--|
| Q8NBZ0        | 295           | 2.13       | 1.76                   | 0.52                      | 26462  | 7.8                   | 15                  | 14                        | 1                         |        |  |
| Spectrum No.  | Peptide Score | Ratio(L/H) | Normalized Ratio (L/H) | Precursor <i>m/z</i> (Da) | Charge | Mass Error (Da)       | Peptide Sequence    | Modification              | Labeled                   | Unique |  |
| 37821         | 55.61         | 2.18       | 1.80                   | 1047.9092                 | 2      | -0.2352               | MAVGPPDCPVGGPLTFPGR | ICAT-C (C)                | YES                       | YES    |  |
| 37822         | 30.51         | 2.79       | 2.30                   | 1047.9110                 | 2      | -0.2316               | MAVGPPDCPVGGPLTFPGR | ICAT-C (C)                | YES                       | YES    |  |
| 37823         | 28.19         | 2.00       | 1.65                   | 1047.9259                 | 2      | -0.2018               | MAVGPPDCPVGGPLTFPGR | ICAT-C (C)                | YES                       | YES    |  |
| 38227         | 68.13         | 2.04       | 1.69                   | 701.9319                  | 3      | -0.2954               | MAVGPPDCPVGGPLTFPGR | ICAT-C:13C(9) (C)         | YES                       | YES    |  |
| 38229         | 38.24         | 2.15       | 1.78                   | 1052.4251                 | 2      | -0.2337               | MAVGPPDCPVGGPLTFPGR | ICAT-C:13C(9) (C)         | YES                       | YES    |  |
| 38234         | 40            | 2.29       | 1.89                   | 1052.4881                 | 2      | -0.1076               | MAVGPPDCPVGGPLTFPGR | ICAT-C:13C(9) (C)         | YES                       | YES    |  |
| 38235         | 53.99         | 2.05       | 1.70                   | 1052.4944                 | 2      | -0.0951               | MAVGPPDCPVGGPLTFPGR | ICAT-C:13C(9) (C)         | YES                       | YES    |  |
| 38415         | 33.26         | 2.15       | 1.77                   | 704.2522                  | 3      | -0.2992               | MAVGPPDCPVGGPLTFPGR | ICAT-C (C); Oxidation (M) | YES                       | YES    |  |
| 38417         | 27.56         | 2.46       | 2.03                   | 704.2595                  | 3      | -0.2773               | MAVGPPDCPVGGPLTFPGR | ICAT-C (C); Oxidation (M) | YES                       | YES    |  |
| 38418         | 32.15         | 2.20       | 1.82                   | 704.2609                  | 3      | -0.2732               | MAVGPPDCPVGGPLTFPGR | ICAT-C (C); Oxidation (M) | YES                       | YES    |  |
| 38419         | 28.04         | 2.01       | 1.66                   | 704.2623                  | 3      | -0.2689               | MAVGPPDCPVGGPLTFPGR | ICAT-C (C); Oxidation (M) | YES                       | YES    |  |
| 38422         | 58.4          | N/A        | N/A                    | 704.3042                  | 3      | -0.1432               | MAVGPPDCPVGGPLTFPGR | ICAT-C (C); Oxidation (M) | YES                       | YES    |  |

|       |       |      |      |          |   |         |                     |                                  |     |     |
|-------|-------|------|------|----------|---|---------|---------------------|----------------------------------|-----|-----|
| 38435 | 41.62 | 3.99 | 3.30 | 704.4082 | 3 | 0.1688  | MAVGPPDCPVGGPLTFPGR | ICAT-C (C); Oxidation (M)        | YES | YES |
| 38695 | 29.04 | 2.69 | 2.22 | 707.3148 | 3 | -0.1417 | MAVGPPDCPVGGPLTFPGR | ICAT-C:13C(9) (C); Oxidation (M) | YES | YES |
| 38696 | 35.52 | 2.31 | 1.91 | 707.3233 | 3 | -0.1161 | MAVGPPDCPVGGPLTFPGR | ICAT-C:13C(9) (C); Oxidation (M) | YES | YES |

### ZZ-type zinc finger-containing protein 3 - Homo sapiens (Human)

| Accession No. | Protein Score | Ratio(L/H) | Normalized Ratio (L/H) | STD                       | Mass   | Sequence Coverage (%) | Identified Peptide   | Quantitated Peptide | Identified Unique Peptide |        |
|---------------|---------------|------------|------------------------|---------------------------|--------|-----------------------|----------------------|---------------------|---------------------------|--------|
| Q8IYH5        | 94            | 2.38       | 1.96                   | 0.20                      | 101960 | 5.3                   | 5                    | 3                   | 1                         |        |
| Spectrum No.  | Peptide Score | Ratio(L/H) | Normalized Ratio (L/H) | Precursor <i>m/z</i> (Da) | Charge | Mass Error (Da)       | Peptide Sequence     | Modification        | Labeled                   | Unique |
| 27031         | 31.09         | 2.40       | 1.98                   | 891.3317                  | 2      | -0.1925               | STVGLNGLDESFQGR      | ICAT-C (C)          | YES                       | YES    |
| 27033         | 31.15         | 2.12       | 1.75                   | 891.3497                  | 2      | -0.1566               | STVGLNGLDESFQGR      | ICAT-C (C)          | YES                       | YES    |
| 27042         | 40.84         | 2.51       | 2.07                   | 891.4093                  | 2      | -0.0374               | STVGLNGLDESFQGR      | ICAT-C (C)          | YES                       | YES    |
| 29462         | 45.3          | N/A        | N/A                    | 929.4309                  | 2      | -0.0400               | CDNCGIEPIQGVV        | 2 ICAT-C (C)        | YES                       | YES    |
| 48604         | 28.48         | N/A        | N/A                    | 639.4154                  | 4      | -0.6457               | KEDSYIDHKVPCTDSQVQVK | ICAT-C:13C(9) (C)   | YES                       | YES    |

### Uncharacterized protein C14orf43 - Homo sapiens (Human)

| Accession No. | Protein Score | Ratio(L/H) | Normalized Ratio (L/H) | STD                       | Mass   | Sequence Coverage (%) | Identified Peptide | Quantitated Peptide | Identified Unique Peptide |        |
|---------------|---------------|------------|------------------------|---------------------------|--------|-----------------------|--------------------|---------------------|---------------------------|--------|
| Q6PJG2        | 158           | 3.23       | 2.67                   | 0.14                      | 114918 | 2.4                   | 7                  | 6                   | 1                         |        |
| Spectrum No.  | Peptide Score | Ratio(L/H) | Normalized Ratio (L/H) | Precursor <i>m/z</i> (Da) | Charge | Mass Error (Da)       | Peptide Sequence   | Modification        | Labeled                   | Unique |
| 11759         | 27            | N/A        | N/A                    | 687.2997                  | 2      | -0.0962               | CLFGGQEPAPK        | ICAT-C (C)          | YES                       | YES    |
| 25987         | 60.39         | 3.22       | 2.66                   | 584.2992                  | 3      | 0.0039                | CGVEFSEPSLATKR     | ICAT-C (C)          | YES                       | YES    |
| 25989         | 56.25         | 3.27       | 2.70                   | 584.3035                  | 3      | 0.0166                | CGVEFSEPSLATKR     | ICAT-C (C)          | YES                       | YES    |
| 25992         | 34.55         | 2.98       | 2.47                   | 584.3076                  | 3      | 0.0290                | CGVEFSEPSLATKR     | ICAT-C (C)          | YES                       | YES    |
| 25993         | 46.96         | 3.01       | 2.49                   | 584.3077                  | 3      | 0.0294                | CGVEFSEPSLATKR     | ICAT-C (C)          | YES                       | YES    |
| 26296         | 38.71         | 3.32       | 2.74                   | 587.3079                  | 3      | -0.0002               | CGVEFSEPSLATKR     | ICAT-C:13C(9) (C)   | YES                       | YES    |
| 26303         | 30.8          | 3.20       | 2.64                   | 587.3165                  | 3      | 0.0256                | CGVEFSEPSLATKR     | ICAT-C:13C(9) (C)   | YES                       | YES    |

### SAPS domain family member 3 - Homo sapiens (Human)

| Accession No. | Protein Score | Ratio(L/H) | Normalized Ratio (L/H) | STD                       | Mass   | Sequence Coverage (%) | Identified Peptide   | Quantitated Peptide | Identified Unique Peptide |        |
|---------------|---------------|------------|------------------------|---------------------------|--------|-----------------------|----------------------|---------------------|---------------------------|--------|
| Q5H9R7        | 40            | 1.97       | 1.63                   | N/A                       | 97608  | 2.4                   | 1                    | 1                   | 1                         |        |
| Spectrum No.  | Peptide Score | Ratio(L/H) | Normalized Ratio (L/H) | Precursor <i>m/z</i> (Da) | Charge | Mass Error (Da)       | Peptide Sequence     | Modification        | Labeled                   | Unique |
| 51316         | 39.91         | 1.97       | 1.63                   | 901.7852                  | 3      | 0.0657                | YKYPNISCELLTSDVSMNDR | ICAT-C (C)          | YES                       | YES    |

### Cytoskeleton-associated protein 5 - Homo sapiens (Human)

| Accession No. | Protein Score | Ratio(L/H) | Normalized Ratio (L/H) | STD | Mass   | Sequence Coverage (%) | Identified Peptide | Quantitated Peptide | Identified Unique Peptide |
|---------------|---------------|------------|------------------------|-----|--------|-----------------------|--------------------|---------------------|---------------------------|
| Q14008        | 46            | N/A        | N/A                    | N/A | 225366 | 0.5                   | 2                  | 0                   | 0                         |

| Spectrum No. | Peptide Score | Ratio(L/H) | Normalized Ratio (L/H) | Precursor m/z (Da) | Charge | Mass Error (Da) | Peptide Sequence | Modification | Labeled | Unique |
|--------------|---------------|------------|------------------------|--------------------|--------|-----------------|------------------|--------------|---------|--------|
| 7395         | 46.57         | N/A        | N/A                    | 615.3453           | 2      | -0.0201         | CLTGLAVGLR       | ICAT-C (C)   | YES     | YES    |
| 7406         | 28.79         | N/A        | N/A                    | 615.4253           | 2      | 0.1398          | CLTGLAVGLR       | ICAT-C (C)   | YES     | YES    |

### Spliceosome RNA helicase BAT1 - Homo sapiens (Human)

| Accession No. | Protein Score | Ratio(L/H) | Normalized Ratio (L/H) | STD | Mass  | Sequence Coverage (%) | Identified Peptide | Quantitated Peptide | Identified Unique Peptide |
|---------------|---------------|------------|------------------------|-----|-------|-----------------------|--------------------|---------------------|---------------------------|
| Q13838        | 157           | NaN        | NaN                    | N/A | 48960 | 7.0                   | 12                 | 0                   | 0                         |

  

| Spectrum No. | Peptide Score | Ratio(L/H) | Normalized Ratio (L/H) | Precursor m/z (Da) | Charge | Mass Error (Da) | Peptide Sequence     | Modification | Labeled | Unique |
|--------------|---------------|------------|------------------------|--------------------|--------|-----------------|----------------------|--------------|---------|--------|
| 7865         | 45.2          | NaN        | NaN                    | 622.3638           | 2      | -0.0206         | DFLLKPELLR           |              | NO      | YES    |
| 7866         | 27.62         | NaN        | NaN                    | 622.3646           | 2      | -0.0190         | DFLLKPELLR           |              | NO      | YES    |
| 7867         | 35.16         | NaN        | NaN                    | 622.3675           | 2      | -0.0131         | DFLLKPELLR           |              | NO      | YES    |
| 7869         | 34.28         | NaN        | NaN                    | 622.3697           | 2      | -0.0088         | DFLLKPELLR           |              | NO      | YES    |
| 7870         | 55.81         | NaN        | NaN                    | 622.3698           | 2      | -0.0086         | DFLLKPELLR           |              | NO      | YES    |
| 7871         | 29.85         | NaN        | NaN                    | 622.3723           | 2      | -0.0036         | DFLLKPELLR           |              | NO      | YES    |
| 7872         | 44.71         | NaN        | NaN                    | 622.3747           | 2      | 0.0014          | DFLLKPELLR           |              | NO      | YES    |
| 7873         | 27.93         | NaN        | NaN                    | 622.3768           | 2      | 0.0055          | DFLLKPELLR           |              | NO      | YES    |
| 7875         | 39.72         | NaN        | NaN                    | 622.3819           | 2      | 0.0157          | DFLLKPELLR           |              | NO      | YES    |
| 7876         | 30.77         | NaN        | NaN                    | 622.3821           | 2      | 0.0161          | DFLLKPELLR           |              | NO      | YES    |
| 7884         | 33.1          | NaN        | NaN                    | 622.5000           | 2      | 0.2519          | DFLLKPELLR           |              | NO      | YES    |
| 46365        | 43.53         | NaN        | NaN                    | 816.4859           | 3      | 0.0841          | CIALAQLLVEQNFPAIAIHR | ICAT-C (C)   | YES     | YES    |

### Zinc finger protein 462 - Homo sapiens (Human)

| Accession No. | Protein Score | Ratio(L/H) | Normalized Ratio (L/H) | STD  | Mass   | Sequence Coverage (%) | Identified Peptide | Quantitated Peptide | Identified Unique Peptide |
|---------------|---------------|------------|------------------------|------|--------|-----------------------|--------------------|---------------------|---------------------------|
| Q96JM2        | 95            | 4.39       | 3.62                   | 0.61 | 161426 | 1.1                   | 3                  | 3                   | 2                         |

  

| Spectrum No. | Peptide Score | Ratio(L/H) | Normalized Ratio (L/H) | Precursor m/z (Da) | Charge | Mass Error (Da) | Peptide Sequence | Modification | Labeled | Unique |
|--------------|---------------|------------|------------------------|--------------------|--------|-----------------|------------------|--------------|---------|--------|
| 32949        | 52.74         | 3.97       | 3.28                   | 654.9728           | 3      | -0.0089         | HDIDAYYTHCLAASR  | ICAT-C (C)   | YES     | YES    |
| 32955        | 36.66         | 5.15       | 4.25                   | 654.9893           | 3      | 0.0407          | HDIDAYYTHCLAASR  | ICAT-C (C)   | YES     | YES    |
| 38686        | 43.9          | 4.25       | 3.51                   | 530.6000           | 4      | 0.3644          | RHDIDAYYTHCLAASR | ICAT-C (C)   | YES     | YES    |

### Bromodomain-containing protein 7 - Homo sapiens (Human)

| Accession No. | Protein Score | Ratio(L/H) | Normalized Ratio (L/H) | STD  | Mass  | Sequence Coverage (%) | Identified Peptide | Quantitated Peptide | Identified Unique Peptide |
|---------------|---------------|------------|------------------------|------|-------|-----------------------|--------------------|---------------------|---------------------------|
| Q9NPI1        | 223           | 4.03       | 3.33                   | 0.95 | 74092 | 9.8                   | 10                 | 8                   | 3                         |

  

| Spectrum No. | Peptide Score | Ratio(L/H) | Normalized Ratio (L/H) | Precursor m/z (Da) | Charge | Mass Error (Da) | Peptide Sequence    | Modification | Labeled | Unique |
|--------------|---------------|------------|------------------------|--------------------|--------|-----------------|---------------------|--------------|---------|--------|
| 42017        | 41.83         | 5.76       | 4.75                   | 748.0639           | 3      | -0.0062         | LSTRPPPNMICLLGPSYR  | ICAT-C (C)   | YES     | YES    |
| 42020        | 32.05         | 3.86       | 3.19                   | 748.0739           | 3      | 0.0236          | LSTRPPPNMICLLGPSYR  | ICAT-C (C)   | YES     | YES    |
| 42024        | 30.72         | 4.72       | 3.90                   | 748.0883           | 3      | 0.0667          | LSTRPPPNMICLLGPSYR  | ICAT-C (C)   | YES     | YES    |
| 45805        | 39.98         | 2.62       | 2.17                   | 808.4153           | 3      | 0.0508          | LMCTNAMIYINKPETIYYK | ICAT-C (C)   | YES     | YES    |

|       |       |      |      |          |   |         |                              |                             |     |     |
|-------|-------|------|------|----------|---|---------|------------------------------|-----------------------------|-----|-----|
| 46219 | 36.09 | 4.91 | 4.05 | 813.7672 | 3 | 0.1115  | LMCTNAMIYNKPETIYYK           | ICAT-C (C); Oxidation (M)   | YES | YES |
| 46519 | 32.23 | N/A  | N/A  | 818.9802 | 3 | -0.2444 | LMCTNAMIYNKPETIYYK           | ICAT-C (C); 2 Oxidation (M) | YES | YES |
| 58295 | 25.99 | N/A  | N/A  | 804.3575 | 4 | -0.2958 | RKPDGTTTLGLLHPVDPIVGEPGYCPVR | ICAT-C (C)                  | YES | YES |
| 58296 | 55.43 | 3.48 | 2.87 | 804.4387 | 4 | 0.0287  | RKPDGTTTLGLLHPVDPIVGEPGYCPVR | ICAT-C (C)                  | YES | YES |
| 58297 | 54.27 | 4.20 | 3.47 | 804.4539 | 4 | 0.0896  | RKPDGTTTLGLLHPVDPIVGEPGYCPVR | ICAT-C (C)                  | YES | YES |
| 58340 | 40.31 | 4.19 | 3.46 | 806.7167 | 4 | 0.1106  | RKPDGTTTLGLLHPVDPIVGEPGYCPVR | ICAT-C:13C(9) (C)           | YES | YES |

### UPF0609 protein C4orf27 - Homo sapiens (Human)

| Accession No. | Protein Score | Ratio(L/H) | Normalized Ratio (L/H) | STD                       | Mass   | Sequence Coverage (%) | Identified Peptide | Quantitated Peptide | Identified Unique Peptide |        |
|---------------|---------------|------------|------------------------|---------------------------|--------|-----------------------|--------------------|---------------------|---------------------------|--------|
| Q9NWX4        | 111           | 3.75       | 3.10                   | 1.37                      | 39383  | 8.1                   | 6                  | 5                   | 2                         |        |
| Spectrum No.  | Peptide Score | Ratio(L/H) | Normalized Ratio (L/H) | Precursor <i>m/z</i> (Da) | Charge | Mass Error (Da)       | Peptide Sequence   | Modification        | Labeled                   | Unique |
| 21237         | 31.89         | 5.23       | 4.32                   | 532.9158                  | 3      | -0.0356               | FCEADVSSDLRK       | ICAT-C (C)          | YES                       | YES    |
| 21239         | 32.14         | 1.95       | 1.61                   | 532.9257                  | 3      | -0.0061               | FCEADVSSDLRK       | ICAT-C (C)          | YES                       | YES    |
| 30729         | 49.45         | 5.25       | 4.34                   | 950.8873                  | 2      | -0.2275               | NCIIVPNGDNVFAAVK   | ICAT-C (C)          | YES                       | YES    |
| 30731         | 49.88         | 4.67       | 3.85                   | 950.8969                  | 2      | -0.2085               | NCIIVPNGDNVFAAVK   | ICAT-C (C)          | YES                       | YES    |
| 30736         | 27.34         | 4.10       | 3.38                   | 950.9524                  | 2      | -0.0974               | NCIIVPNGDNVFAAVK   | ICAT-C (C)          | YES                       | YES    |
| 30742         | 29.89         | N/A        | N/A                    | 950.9659                  | 2      | -0.0704               | NCIIVPNGDNVFAAVK   | ICAT-C (C)          | YES                       | YES    |

### Chromatin accessibility complex protein 1 - Homo sapiens (Human)

| Accession No. | Protein Score | Ratio(L/H) | Normalized Ratio (L/H) | STD                       | Mass   | Sequence Coverage (%) | Identified Peptide | Quantitated Peptide | Identified Unique Peptide |        |
|---------------|---------------|------------|------------------------|---------------------------|--------|-----------------------|--------------------|---------------------|---------------------------|--------|
| Q9NRG0        | 330           | 3.23       | 2.67                   | 1.22                      | 14701  | 11.5                  | 10                 | 9                   | 1                         |        |
| Spectrum No.  | Peptide Score | Ratio(L/H) | Normalized Ratio (L/H) | Precursor <i>m/z</i> (Da) | Charge | Mass Error (Da)       | Peptide Sequence   | Modification        | Labeled                   | Unique |
| 34101         | 50.44         | 2.32       | 1.92                   | 996.3794                  | 2      | -0.2380               | ATELFVQCLATYSYR    | ICAT-C (C)          | YES                       | YES    |
| 34103         | 35.46         | 2.23       | 1.84                   | 996.3907                  | 2      | -0.2153               | ATELFVQCLATYSYR    | ICAT-C (C)          | YES                       | YES    |
| 34104         | 34.29         | 5.32       | 4.39                   | 996.4080                  | 2      | -0.1808               | ATELFVQCLATYSYR    | ICAT-C (C)          | YES                       | YES    |
| 34105         | 82.77         | 3.47       | 2.86                   | 996.4173                  | 2      | -0.1621               | ATELFVQCLATYSYR    | ICAT-C (C)          | YES                       | YES    |
| 34108         | 55.91         | 4.79       | 3.96                   | 996.4505                  | 2      | -0.0958               | ATELFVQCLATYSYR    | ICAT-C (C)          | YES                       | YES    |
| 34109         | 59.7          | 2.87       | 2.37                   | 996.4719                  | 2      | -0.0529               | ATELFVQCLATYSYR    | ICAT-C (C)          | YES                       | YES    |
| 34111         | 62.83         | N/A        | N/A                    | 996.4941                  | 2      | -0.0085               | ATELFVQCLATYSYR    | ICAT-C (C)          | YES                       | YES    |
| 34297         | 25.2          | 2.13       | 1.76                   | 1000.9084                 | 2      | -0.2101               | ATELFVQCLATYSYR    | ICAT-C:13C(9) (C)   | YES                       | YES    |
| 34298         | 69.4          | 3.49       | 2.88                   | 1000.9282                 | 2      | -0.1705               | ATELFVQCLATYSYR    | ICAT-C:13C(9) (C)   | YES                       | YES    |
| 34305         | 52.86         | 4.78       | 3.95                   | 1000.9938                 | 2      | -0.0393               | ATELFVQCLATYSYR    | ICAT-C:13C(9) (C)   | YES                       | YES    |

### Zinc finger protein 335 - Homo sapiens (Human)

| Accession No. | Protein Score | Ratio(L/H) | Normalized Ratio (L/H) | STD                       | Mass   | Sequence Coverage (%) | Identified Peptide | Quantitated Peptide | Identified Unique Peptide |        |
|---------------|---------------|------------|------------------------|---------------------------|--------|-----------------------|--------------------|---------------------|---------------------------|--------|
| Q9H4Z2        | 57            | 3.09       | 2.55                   | 0.92                      | 144802 | 2.1                   | 2                  | 2                   | 1                         |        |
| Spectrum No.  | Peptide Score | Ratio(L/H) | Normalized Ratio (L/H) | Precursor <i>m/z</i> (Da) | Charge | Mass Error (Da)       | Peptide Sequence   | Modification        | Labeled                   | Unique |

|       |       |      |      |           |   |         |                             |                   |     |     |
|-------|-------|------|------|-----------|---|---------|-----------------------------|-------------------|-----|-----|
| 57574 | 26.25 | 3.93 | 3.25 | 1040.9604 | 3 | 0.4492  | TPVEAGVQSDAENAASPSCDEHDTLPR | ICAT-C (C)        | YES | YES |
| 57633 | 57.25 | 2.63 | 2.17 | 1043.7288 | 3 | -0.2758 | TPVEAGVQSDAENAASPSCDEHDTLPR | ICAT-C:13C(9) (C) | YES | YES |

### YEATS domain-containing protein 2 - Homo sapiens (Human)

| Accession No. | Protein Score | Ratio(L/H) | Normalized Ratio (L/H) | STD                       | Mass   | Sequence Coverage (%) | Identified Peptide              | Quantitated Peptide | Identified Unique Peptide |        |
|---------------|---------------|------------|------------------------|---------------------------|--------|-----------------------|---------------------------------|---------------------|---------------------------|--------|
| Q9ULM3        | 97            | 2.73       | 2.26                   | 0.43                      | 150688 | 6.3                   | 6                               | 4                   | 3                         |        |
| Spectrum No.  | Peptide Score | Ratio(L/H) | Normalized Ratio (L/H) | Precursor <i>m/z</i> (Da) | Charge | Mass Error (Da)       | Peptide Sequence                | Modification        | Labeled                   | Unique |
| 27075         | 29.26         | N/A        | N/A                    | 892.4215                  | 2      | -0.1053               | ACIVANYASAGLLK                  | ICAT-C (C)          | YES                       | YES    |
| 27082         | 28.49         | N/A        | N/A                    | 892.4369                  | 2      | -0.0745               | ACIVANYASAGLLK                  | ICAT-C (C)          | YES                       | YES    |
| 46180         | 25.57         | 2.62       | 2.16                   | 813.4284                  | 3      | 0.1116                | VTFCSHGNSAFQPIASSCK             | 2 ICAT-C (C)        | YES                       | YES    |
| 47931         | 43.31         | 2.74       | 2.26                   | 838.4511                  | 3      | 0.0835                | VKTEPETPGPSCLSQEGQTAVK          | ICAT-C (C)          | YES                       | YES    |
| 48083         | 42.55         | 2.65       | 2.19                   | 841.4559                  | 3      | 0.0678                | VKTEPETPGPSCLSQEGQTAVK          | ICAT-C:13C(9) (C)   | YES                       | YES    |
| 60267         | 26.57         | 3.53       | 2.92                   | 1231.0767                 | 3      | 0.3947                | HSLGEDCIYPQSSDISDAPPSLPLTIPAPVK | ICAT-C (C)          | YES                       | YES    |

### E3 ubiquitin-protein ligase UHRF2 - Homo sapiens (Human)

| Accession No. | Protein Score | Ratio(L/H) | Normalized Ratio (L/H) | STD                       | Mass   | Sequence Coverage (%) | Identified Peptide  | Quantitated Peptide | Identified Unique Peptide |        |
|---------------|---------------|------------|------------------------|---------------------------|--------|-----------------------|---------------------|---------------------|---------------------------|--------|
| Q96PU4        | 182           | 2.33       | 1.92                   | 0.22                      | 89928  | 3.6                   | 7                   | 5                   | 1                         |        |
| Spectrum No.  | Peptide Score | Ratio(L/H) | Normalized Ratio (L/H) | Precursor <i>m/z</i> (Da) | Charge | Mass Error (Da)       | Peptide Sequence    | Modification        | Labeled                   | Unique |
| 19340         | 44.97         | N/A        | N/A                    | 768.3372                  | 2      | -0.0787               | AQVFSCPACR          | 2 ICAT-C (C)        | YES                       | NO     |
| 40997         | 41.87         | 2.18       | 1.80                   | 733.6225                  | 3      | -0.2543               | ALALNCDAPLDDKIGAESR | ICAT-C (C)          | YES                       | YES    |
| 41007         | 28.94         | N/A        | N/A                    | 733.7114                  | 3      | 0.0124                | ALALNCDAPLDDKIGAESR | ICAT-C (C)          | YES                       | YES    |
| 41014         | 53.46         | 2.53       | 2.09                   | 733.7305                  | 3      | 0.0697                | ALALNCDAPLDDKIGAESR | ICAT-C (C)          | YES                       | YES    |
| 41017         | 47.31         | 1.99       | 1.65                   | 733.7393                  | 3      | 0.0960                | ALALNCDAPLDDKIGAESR | ICAT-C (C)          | YES                       | YES    |
| 41273         | 37.82         | 2.46       | 2.03                   | 736.7307                  | 3      | 0.0401                | ALALNCDAPLDDKIGAESR | ICAT-C:13C(9) (C)   | YES                       | YES    |
| 41277         | 32.7          | 2.35       | 1.94                   | 736.7392                  | 3      | 0.0654                | ALALNCDAPLDDKIGAESR | ICAT-C:13C(9) (C)   | YES                       | YES    |

### Protein S100-A8 - Homo sapiens (Human)

| Accession No. | Protein Score | Ratio(L/H) | Normalized Ratio (L/H) | STD                       | Mass   | Sequence Coverage (%) | Identified Peptide | Quantitated Peptide | Identified Unique Peptide |        |
|---------------|---------------|------------|------------------------|---------------------------|--------|-----------------------|--------------------|---------------------|---------------------------|--------|
| P05109        | 56            | 10.79      | 8.91                   | N/A                       | 10828  | 11.8                  | 2                  | 1                   | 1                         |        |
| Spectrum No.  | Peptide Score | Ratio(L/H) | Normalized Ratio (L/H) | Precursor <i>m/z</i> (Da) | Charge | Mass Error (Da)       | Peptide Sequence   | Modification        | Labeled                   | Unique |
| 21120         | 50.28         | N/A        | N/A                    | 796.3338                  | 2      | -0.1546               | LLETECPQYIR        | ICAT-C (C)          | YES                       | YES    |
| 21128         | 31.13         | 10.79      | 8.91                   | 796.3953                  | 2      | -0.0315               | LLETECPQYIR        | ICAT-C (C)          | YES                       | YES    |

### Serine/threonine-protein kinase VRK1 - Homo sapiens (Human)

| Accession No. | Protein Score | Ratio(L/H) | Normalized Ratio (L/H) | STD  | Mass  | Sequence Coverage (%) | Identified Peptide | Quantitated Peptide | Identified Unique Peptide |
|---------------|---------------|------------|------------------------|------|-------|-----------------------|--------------------|---------------------|---------------------------|
| Q99986        | 124           | 5.02       | 4.14                   | 0.61 | 45447 | 5.3                   | 4                  | 3                   | 1                         |



| Spectrum No. | Peptide Score | Ratio(L/H) | Normalized Ratio (L/H) | Precursor m/z (Da) | Charge | Mass Error (Da) | Peptide Sequence      | Modification      | Labeled | Unique |
|--------------|---------------|------------|------------------------|--------------------|--------|-----------------|-----------------------|-------------------|---------|--------|
| 46498        | 53.17         | N/A        | N/A                    | 818.7148           | 3      | -0.0167         | CHDGTIEFTSIDAHNGVAPSR | ICAT-C (C)        | YES     | YES    |
| 46499        | 49.85         | 4.62       | 3.82                   | 818.7166           | 3      | -0.0113         | CHDGTIEFTSIDAHNGVAPSR | ICAT-C (C)        | YES     | YES    |
| 46502        | 49.25         | 5.80       | 4.79                   | 614.2966           | 4      | 0.0177          | CHDGTIEFTSIDAHNGVAPSR | ICAT-C (C)        | YES     | YES    |
| 46724        | 46.24         | 4.95       | 4.09                   | 821.7184           | 3      | -0.0362         | CHDGTIEFTSIDAHNGVAPSR | ICAT-C:13C(9) (C) | YES     | YES    |

### Deoxynucleotidyltransferase terminal-interacting protein 1 - Homo sapiens (Human)

| Accession No. | Protein Score | Ratio(L/H) | Normalized Ratio (L/H) | STD  | Mass  | Sequence Coverage (%) | Identified Peptide | Quantitated Peptide | Identified Unique Peptide |
|---------------|---------------|------------|------------------------|------|-------|-----------------------|--------------------|---------------------|---------------------------|
| Q9H147        | 481           | 5.81       | 4.80                   | 1.30 | 36990 | 10.6                  | 16                 | 12                  | 2                         |

  

| Spectrum No. | Peptide Score | Ratio(L/H) | Normalized Ratio (L/H) | Precursor m/z (Da) | Charge | Mass Error (Da) | Peptide Sequence          | Modification      | Labeled | Unique |
|--------------|---------------|------------|------------------------|--------------------|--------|-----------------|---------------------------|-------------------|---------|--------|
| 17761        | 29.55         | N/A        | N/A                    | 496.6004           | 3      | -0.0271         | GCLDLKLEELK               | ICAT-C (C)        | YES     | YES    |
| 42055        | 31.16         | 7.62       | 6.30                   | 748.9185           | 3      | -0.2990         | DNVGEEVD AEQLIQEACR       | ICAT-C (C)        | YES     | YES    |
| 42056        | 36.53         | 7.21       | 5.96                   | 748.9264           | 3      | -0.2753         | DNVGEEVD AEQLIQEACR       | ICAT-C (C)        | YES     | YES    |
| 42057        | 47.34         | 5.25       | 4.33                   | 748.9274           | 3      | -0.2724         | DNVGEEVD AEQLIQEACR       | ICAT-C (C)        | YES     | YES    |
| 42058        | 81.88         | 6.97       | 5.76                   | 1122.8998          | 2      | -0.2478         | DNVGEEVD AEQLIQEACR       | ICAT-C (C)        | YES     | YES    |
| 42067        | 33.93         | 6.03       | 4.98                   | 748.9718           | 3      | -0.1393         | DNVGEEVD AEQLIQEACR       | ICAT-C (C)        | YES     | YES    |
| 42070        | 92.82         | 5.94       | 4.90                   | 1122.9602          | 2      | -0.1270         | DNVGEEVD AEQLIQEACR       | ICAT-C (C)        | YES     | YES    |
| 42072        | 37.32         | 8.15       | 6.73                   | 748.9803           | 3      | -0.1138         | DNVGEEVD AEQLIQEACR       | ICAT-C (C)        | YES     | YES    |
| 42074        | 25.47         | 6.05       | 5.00                   | 748.9835           | 3      | -0.1042         | DNVGEEVD AEQLIQEACR       | ICAT-C (C)        | YES     | YES    |
| 42076        | 40.41         | 6.29       | 5.20                   | 748.9929           | 3      | -0.0761         | DNVGEEVD AEQLIQEACR       | ICAT-C (C)        | YES     | YES    |
| 42118        | 99.19         | 5.42       | 4.48                   | 1123.2000          | 2      | 0.3526          | DNVGEEVD AEQLIQEACR       | ICAT-C (C)        | YES     | YES    |
| 42319        | 34.31         | 6.64       | 5.49                   | 1127.4153          | 2      | -0.2469         | DNVGEEVD AEQLIQEACR       | ICAT-C:13C(9) (C) | YES     | YES    |
| 54176        | 69.73         | 3.13       | 2.58                   | 957.0503           | 3      | -0.2746         | AALNVRDNVGEEVD AEQLIQEACR | ICAT-C (C)        | YES     | YES    |
| 54183        | 51.99         | N/A        | N/A                    | 957.1728           | 3      | 0.0932          | AALNVRDNVGEEVD AEQLIQEACR | ICAT-C (C)        | YES     | YES    |
| 54184        | 38.34         | N/A        | N/A                    | 957.1732           | 3      | 0.0941          | AALNVRDNVGEEVD AEQLIQEACR | ICAT-C (C)        | YES     | YES    |
| 54190        | 41.28         | N/A        | N/A                    | 957.2808           | 3      | 0.4170          | AALNVRDNVGEEVD AEQLIQEACR | ICAT-C (C)        | YES     | YES    |

### PR domain zinc finger protein 16 - Homo sapiens (Human)

| Accession No. | Protein Score | Ratio(L/H) | Normalized Ratio (L/H) | STD  | Mass   | Sequence Coverage (%) | Identified Peptide | Quantitated Peptide | Identified Unique Peptide |
|---------------|---------------|------------|------------------------|------|--------|-----------------------|--------------------|---------------------|---------------------------|
| Q9HAZ2        | 44            | 2.25       | 1.85                   | 0.02 | 140172 | 0.8                   | 2                  | 2                   | 1                         |

  

| Spectrum No. | Peptide Score | Ratio(L/H) | Normalized Ratio (L/H) | Precursor m/z (Da) | Charge | Mass Error (Da) | Peptide Sequence | Modification      | Labeled | Unique |
|--------------|---------------|------------|------------------------|--------------------|--------|-----------------|------------------|-------------------|---------|--------|
| 15820        | 31.03         | 2.26       | 1.87                   | 723.2746           | 2      | -0.1422         | SYTQFSNLCR       | ICAT-C (C)        | YES     | YES    |
| 16308        | 44.37         | 2.23       | 1.85                   | 727.7847           | 2      | -0.1522         | SYTQFSNLCR       | ICAT-C:13C(9) (C) | YES     | YES    |

## Instruction for Supplementary Table 2

The following information is instruction for the interpretation of protein and peptide ratios in Supplementary Table 2.

Each protein contains protein and peptide information as follows:

### **Protein-level Information:**

The protein description is shown at the first row. Detailed protein-level information is provided as follows:

1. **Accession Number:** Accession number in Swiss-Prot sequence database v54.2.
2. **Protein Score:** Mascot protein score.
3. **Normalized Ratio (114/117), (115/117), and (116/117):** Normalized protein ratio between proteins enriched by WT DNA-beads, which were labeled by iTRAQ<sup>114</sup> and iTRAQ<sup>115</sup>, and proteins enriched by MU DNA-beads, which were labeled by iTRAQ<sup>116</sup> and iTRAQ<sup>117</sup>. The value is a weighted average of the ratio of all quantitated peptides (see below).
4. **STD:** standard deviation of normalized ratio.
5. **Mass:** Molecular weight (Da) of the protein.
6. **Sequence Coverage (%):** The number of amino acids spanned by the assigned peptides divided by the sequence length.
7. **Identified Peptide:** The number of peptides assigned to the protein by Mascot. Multiple matches to peptides with the same primary sequence count separately.
8. **Quantitated Peptide:** The number of identified peptides for ratio quantitation.
9. **Identified Unique Peptide:** The number of peptides assigned to the protein by Mascot. Multiple matches to peptides with the same primary sequence count as one.

### **Peptide-level Information:**

Peptide-level information contains detailed information for identified peptides assigned to the protein as follows:

1. **Spectrum No.:** The index number of MS/MS spectrum for Mascot search.
2. **Peptide Score:** Mascot Peptide Score.
3. **Int. 114~117:** Ion intensity of each reporter ion in MS/MS analysis.
4. **Ratio (114/117), (115/117), and (116/117):** Peptide ratio of indicated reporter ion pairs of the peptide.
5. **Precursor *m/z* (Da):** The precursor ion selected for MS/MS analysis.
6. **Charge:** The charge state of precursor ion.

7. **Mass Error (Da):** The value of observed peptide mass minus expected peptide mass.
8. **Peptide Sequence:** The peptide sequence of matched peptide.
9. **Modification:** Observed modification of the peptide.
10. **Labeled:** The value is “Yes” if the peptide is labeled with iTRAQ reagents.
11. **Unique:** The value is “Yes” if the peptide is a non-degenerate peptide.

## Supplementary Table 2

### *bHLH* transcription factors

#### Transcription factor AP-4 - Homo sapiens (Human)

| Accession No. | Protein Score | Normalized Ratio (114/117) | Normalized Ratio (115/117) | Normalized Ratio (116/117) | STD (114/117) | STD (115/117)   | STD (116/117)   | Mass            | Sequence Coverage (%) | Identified Peptide | Quantitated Peptide | Identified Unique Peptide |                                     |         |        |
|---------------|---------------|----------------------------|----------------------------|----------------------------|---------------|-----------------|-----------------|-----------------|-----------------------|--------------------|---------------------|---------------------------|-------------------------------------|---------|--------|
| Q01664        | 199           | 2.46                       | 1.96                       | 1.32                       | 0.60          | 0.39            | 0.34            | 38702           | 5.3                   | 5                  | 3                   | 1                         |                                     |         |        |
| Spectrum No.  | Peptide Score | Int. 114                   | Int. 115                   | Int. 116                   | Int. 117      | Ratio (114/117) | Ratio (115/117) | Ratio (116/117) | Precursor m/z (Da)    | Charge             | Mass Error (Da)     | Peptide Sequence          | Modification                        | Labeled | Unique |
| 87636         | 53.63         | 37.38                      | 31.22                      | 18.81                      | 9.12          | 5.06            | 3.72            | 2.15            | 790.7753              | 3                  | 0.0319              | AAILQQTAEYIFSLEQEK        | iTRAQ4plex (K); iTRAQ4plex (N-term) | YES     | YES    |
| 87637         | 54.08         | 76.72                      | 64.06                      | 46.10                      | 28.86         | 3.28            | 2.41            | 1.66            | 790.7926              | 3                  | 0.0838              | AAILQQTAEYIFSLEQEK        | iTRAQ4plex (K); iTRAQ4plex (N-term) | YES     | YES    |
| 87639         | 61.56         | 74.79                      | 60.41                      | 37.86                      | 40.24         | 2.29            | 1.63            | 0.98            | 790.7970              | 3                  | 0.0971              | AAILQQTAEYIFSLEQEK        | iTRAQ4plex (K); iTRAQ4plex (N-term) | YES     | YES    |
| 87643         | 77.06         | 0.00                       | 0.00                       | 0.00                       | 0.00          | 0.00            | 0.00            | 0.00            | 790.8073              | 3                  | 0.1278              | AAILQQTAEYIFSLEQEK        | iTRAQ4plex (K); iTRAQ4plex (N-term) | YES     | YES    |
| 87653         | 58.37         | 151.97                     | 151.69                     | 108.76                     | 85.95         | 2.18            | 1.92            | 1.32            | 790.9000              | 3                  | 0.4060              | AAILQQTAEYIFSLEQEK        | iTRAQ4plex (K); iTRAQ4plex (N-term) | YES     | YES    |

#### Upstream stimulatory factor 2 - Homo sapiens (Human)

| Accession No. | Protein Score | Normalized Ratio (114/117) | Normalized Ratio (115/117) | Normalized Ratio (116/117) | STD (114/117) | STD (115/117)   | STD (116/117)   | Mass            | Sequence Coverage (%) | Identified Peptide | Quantitated Peptide | Identified Unique Peptide |                                    |         |        |
|---------------|---------------|----------------------------|----------------------------|----------------------------|---------------|-----------------|-----------------|-----------------|-----------------------|--------------------|---------------------|---------------------------|------------------------------------|---------|--------|
| Q15853        | 108           | 3.36                       | 3.22                       | 1.11                       | 0.90          | 0.71            | 0.09            | 36932           | 4.6                   | 4                  | 4                   | 1                         |                                    |         |        |
| Spectrum No.  | Peptide Score | Int. 114                   | Int. 115                   | Int. 116                   | Int. 117      | Ratio (114/117) | Ratio (115/117) | Ratio (116/117) | Precursor m/z (Da)    | Charge             | Mass Error (Da)     | Peptide Sequence          | Modification                       | Labeled | Unique |
| 72199         | 44.39         | 294.04                     | 348.07                     | 180.86                     | 151.51        | 2.40            | 2.50            | 1.24            | 652.3550              | 3                  | 0.0619              | AQLQQHNLEMVGEGR           | iTRAQ4plex (N-term)                | YES     | YES    |
| 72201         | 48.68         | 312.40                     | 329.81                     | 121.14                     | 119.22        | 3.24            | 3.01            | 1.06            | 652.3651              | 3                  | 0.0924              | AQLQQHNLEMVGEGR           | iTRAQ4plex (N-term)                | YES     | YES    |
| 72207         | 44.09         | 301.80                     | 360.24                     | 159.97                     | 156.44        | 2.38            | 2.50            | 1.07            | 652.3819              | 3                  | 0.1427              | AQLQQHNLEMVGEGR           | iTRAQ4plex (N-term)                | YES     | YES    |
| 72771         | 53.75         | 777.50                     | 824.93                     | 232.30                     | 223.72        | 4.29            | 4.01            | 1.08            | 657.6907              | 3                  | 0.0742              | AQLQQHNLEMVGEGR           | iTRAQ4plex (N-term); Oxidation (M) | YES     | YES    |

### Transcription factors

#### Nuclear factor of activated T-cells, cytoplasmic 2 - Homo sapiens (Human)

| Accession No. | Protein Score | Normalized Ratio (114/117) | Normalized Ratio (115/117) | Normalized Ratio (116/117) | STD (114/117) | STD (115/117)   | STD (116/117)   | Mass            | Sequence Coverage (%) | Identified Peptide | Quantitated Peptide | Identified Unique Peptide |                     |         |        |
|---------------|---------------|----------------------------|----------------------------|----------------------------|---------------|-----------------|-----------------|-----------------|-----------------------|--------------------|---------------------|---------------------------|---------------------|---------|--------|
| Q13469        | 88            | 2.00                       | 2.05                       | 1.05                       | 0.58          | 0.49            | 0.04            | 100083          | 1.8                   | 3                  | 3                   | 1                         |                     |         |        |
| Spectrum No.  | Peptide Score | Int. 114                   | Int. 115                   | Int. 116                   | Int. 117      | Ratio (114/117) | Ratio (115/117) | Ratio (116/117) | Precursor m/z (Da)    | Charge             | Mass Error (Da)     | Peptide Sequence          | Modification        | Labeled | Unique |
| 74755         | 53.19         | 100.34                     | 132.80                     | 73.46                      | 72.56         | 1.71            | 1.99            | 1.05            | 673.0717              | 3                  | 0.0442              | IEITPSHELIAVGPLR          | iTRAQ4plex (N-term) | YES     | YES    |
| 74763         | 44.00         | 174.97                     | 201.55                     | 132.89                     | 136.82        | 1.58            | 1.60            | 1.01            | 673.0848              | 3                  | 0.0835              | IEITPSHELIAVGPLR          | iTRAQ4plex (N-term) | YES     | YES    |
| 74766         | 58.36         | 193.71                     | 214.63                     | 94.97                      | 90.51         | 2.64            | 2.58            | 1.09            | 673.0945              | 3                  | 0.1128              | IEITPSHELIAVGPLR          | iTRAQ4plex (N-term) | YES     | YES    |

#### Alpha-globin transcription factor CP2 - Homo sapiens (Human)

| Accession No. | Protein Score | Normalized Ratio (114/117) | Normalized Ratio (115/117) | Normalized Ratio (116/117) | STD (114/117) | STD (115/117)   | STD (116/117)   | Mass            | Sequence Coverage (%) | Identified Peptide | Quantitated Peptide | Identified Unique Peptide |                                     |         |        |
|---------------|---------------|----------------------------|----------------------------|----------------------------|---------------|-----------------|-----------------|-----------------|-----------------------|--------------------|---------------------|---------------------------|-------------------------------------|---------|--------|
| Q12800        | 522           | 2.26                       | 2.00                       | 0.96                       | 0.34          | 0.33            | 0.08            | 57220           | 12.9                  | 18                 | 9                   | 5                         |                                     |         |        |
| Spectrum No.  | Peptide Score | Int. 114                   | Int. 115                   | Int. 116                   | Int. 117      | Ratio (114/117) | Ratio (115/117) | Ratio (116/117) | Precursor m/z (Da)    | Charge             | Mass Error (Da)     | Peptide Sequence          | Modification                        | Labeled | Unique |
| 33816         | 47.96         | 1270.56                    | 1322.22                    | 636.93                     | 712.02        | 2.20            | 2.02            | 0.93            | 679.4238              | 2                  | 0.0475              | LGELPEINGK                | iTRAQ4plex (K); iTRAQ4plex (N-term) | YES     | YES    |
| 33820         | 41.66         | 538.36                     | 582.23                     | 225.35                     | 249.28        | 2.67            | 2.54            | 0.94            | 679.4272              | 2                  | 0.0542              | LGELPEINGK                | iTRAQ4plex (K); iTRAQ4plex (N-term) | YES     | YES    |
| 52633         | 72.67         | 1773.24                    | 1788.11                    | 941.33                     | 1024.85       | 2.14            | 1.90            | 0.96            | 807.4601              | 2                  | -0.0012             | LFTNFSGADLLK              | iTRAQ4plex (K); iTRAQ4plex (N-term) | YES     | YES    |
| 52648         | 80.12         | 0.00                       | 0.00                       | 0.00                       | 0.00          | 0.00            | 0.00            | 0.00            | 807.4803              | 2                  | 0.0392              | LFTNFSGADLLK              | iTRAQ4plex (K); iTRAQ4plex (N-term) | YES     | YES    |
| 52649         | 45.43         | 777.34                     | 782.89                     | 455.53                     | 576.72        | 1.66            | 1.48            | 0.82            | 807.4803              | 2                  | 0.0392              | LFTNFSGADLLK              | iTRAQ4plex (K); iTRAQ4plex (N-term) | YES     | YES    |
| 52654         | 70.68         | 306.21                     | 339.56                     | 172.50                     | 196.90        | 1.92            | 1.87            | 0.91            | 807.4835              | 2                  | 0.0456              | LFTNFSGADLLK              | iTRAQ4plex (K); iTRAQ4plex (N-term) | YES     | YES    |
| 52655         | 84.03         | 0.00                       | 0.00                       | 0.00                       | 0.00          | 0.00            | 0.00            | 0.00            | 807.4855              | 2                  | 0.0496              | LFTNFSGADLLK              | iTRAQ4plex (K); iTRAQ4plex (N-term) | YES     | YES    |
| 52660         | 59.50         | 1247.45                    | 1177.28                    | 646.11                     | 736.75        | 2.09            | 1.74            | 0.91            | 807.4974              | 2                  | 0.0735              | LFTNFSGADLLK              | iTRAQ4plex (K); iTRAQ4plex (N-term) | YES     | YES    |
| 57724         | 44.45         | 767.46                     | 826.81                     | 416.99                     | 404.41        | 2.34            | 2.22            | 1.07            | 564.6604              | 3                  | 0.0459              | AETNDSYHILK               | iTRAQ4plex (K); iTRAQ4plex (N-term) | YES     | YES    |

|       |       |         |         |        |        |      |      |      |          |   |        |                    |                                     |     |     |
|-------|-------|---------|---------|--------|--------|------|------|------|----------|---|--------|--------------------|-------------------------------------|-----|-----|
| 57727 | 44.95 | 1201.37 | 1181.30 | 606.82 | 615.51 | 2.41 | 2.09 | 1.03 | 564.6644 | 3 | 0.0582 | AETNDSYHILK        | iTRAQ4plex (K); iTRAQ4plex (N-term) | YES | YES |
| 65765 | 54.64 | 1124.05 | 1047.37 | 526.45 | 516.26 | 2.69 | 2.21 | 1.06 | 611.3322 | 3 | 0.0613 | LQYTEHQQLLEGWR     | iTRAQ4plex (N-term)                 | YES | YES |
| 65769 | 42.83 | 410.86  | 407.03  | 183.93 | 211.32 | 2.40 | 2.09 | 0.91 | 611.3368 | 3 | 0.0751 | LQYTEHQQLLEGWR     | iTRAQ4plex (N-term)                 | YES | YES |
| 86413 | 65.05 | 116.55  | 172.58  | 114.20 | 122.69 | 1.17 | 1.53 | 0.97 | 775.4138 | 3 | 0.0629 | LHDETLTYLNQGQSYEIR | iTRAQ4plex (N-term)                 | YES | NO  |
| 86414 | 53.71 | 188.46  | 327.14  | 186.21 | 152.29 | 1.53 | 2.33 | 1.27 | 775.4156 | 3 | 0.0685 | LHDETLTYLNQGQSYEIR | iTRAQ4plex (N-term)                 | YES | NO  |
| 86415 | 66.25 | 587.87  | 856.66  | 442.12 | 393.25 | 1.85 | 2.37 | 1.17 | 775.4198 | 3 | 0.0811 | LHDETLTYLNQGQSYEIR | iTRAQ4plex (N-term)                 | YES | NO  |
| 86416 | 86.77 | 0.00    | 0.00    | 0.00   | 0.00   | 0.00 | 0.00 | 0.00 | 775.4209 | 3 | 0.0843 | LHDETLTYLNQGQSYEIR | iTRAQ4plex (N-term)                 | YES | NO  |
| 86417 | 52.70 | 99.71   | 164.57  | 82.18  | 85.14  | 1.45 | 2.10 | 1.01 | 775.4307 | 3 | 0.1136 | LHDETLTYLNQGQSYEIR | iTRAQ4plex (N-term)                 | YES | NO  |
| 86422 | 54.88 | 161.21  | 239.34  | 134.01 | 131.73 | 1.51 | 1.97 | 1.06 | 775.4484 | 3 | 0.1666 | LHDETLTYLNQGQSYEIR | iTRAQ4plex (N-term)                 | YES | NO  |

### General transcription factor II-I - Homo sapiens (Human)

| Accession No. | Protein Score | Normalized Ratio (114/117) | Normalized Ratio (115/117) | Normalized Ratio (116/117) | STD (114/117) | STD (115/117)   | STD (116/117)   | Mass            | Sequence Coverage (%) | Identified Peptide | Quantitated Peptide | Identified Unique Peptide |                                                      |         |        |
|---------------|---------------|----------------------------|----------------------------|----------------------------|---------------|-----------------|-----------------|-----------------|-----------------------|--------------------|---------------------|---------------------------|------------------------------------------------------|---------|--------|
| Spectrum No.  | Peptide Score | Int. 114                   | Int. 115                   | Int. 116                   | Int. 117      | Ratio (114/117) | Ratio (115/117) | Ratio (116/117) | Precursor m/z (Da)    | Charge             | Mass Error (Da)     | Peptide Sequence          | Modification                                         | Labeled | Unique |
| P78347        | 757           | 1.74                       | 1.63                       | 0.98                       | 0.33          | 0.36            | 0.13            | 112346          | 23.4                  | 40                 | 28                  | 20                        |                                                      |         |        |
| 16164         | 47.56         | 1964.94                    | 2052.90                    | 1293.12                    | 1374.76       | 1.76            | 1.62            | 0.98            | 568.8741              | 2                  | 0.0129              | AGISFIIK                  | iTRAQ4plex (K); iTRAQ4plex (N-term)                  | YES     | YES    |
| 16167         | 66.84         | 2406.44                    | 2428.13                    | 1382.48                    | 1418.36       | 2.09            | 1.86            | 1.02            | 568.8764              | 2                  | 0.0173              | AGISFIIK                  | iTRAQ4plex (K); iTRAQ4plex (N-term)                  | YES     | YES    |
| 16170         | 40.49         | 411.67                     | 466.49                     | 233.73                     | 208.02        | 2.44            | 2.44            | 1.17            | 568.8828              | 2                  | 0.0302              | AGISFIIK                  | iTRAQ4plex (K); iTRAQ4plex (N-term)                  | YES     | YES    |
| 16171         | 49.28         | 696.18                     | 791.19                     | 475.11                     | 479.83        | 1.79            | 1.79            | 1.03            | 568.8984              | 2                  | 0.0614              | AGISFIIK                  | iTRAQ4plex (K); iTRAQ4plex (N-term)                  | YES     | YES    |
| 25164         | 43.88         | 1719.54                    | 1723.00                    | 1113.71                    | 1134.16       | 1.87            | 1.65            | 1.02            | 626.3247              | 2                  | -0.0029             | EQVNDLFSR                 | iTRAQ4plex (N-term)                                  | YES     | YES    |
| 25193         | 47.86         | 914.96                     | 901.97                     | 646.46                     | 655.01        | 1.72            | 1.50            | 1.03            | 626.3511              | 2                  | 0.0499              | EQVNDLFSR                 | iTRAQ4plex (N-term)                                  | YES     | YES    |
| 25195         | 40.03         | 1191.06                    | 1246.96                    | 924.86                     | 1023.13       | 1.44            | 1.32            | 0.94            | 626.3524              | 2                  | 0.0525              | EQVNDLFSR                 | iTRAQ4plex (N-term)                                  | YES     | YES    |
| 27665         | 45.21         | 1992.15                    | 1942.69                    | 1084.38                    | 1246.26       | 1.97            | 1.69            | 0.91            | 640.8679              | 2                  | 0.0197              | VENLNFNEK                 | iTRAQ4plex (K); iTRAQ4plex (N-term)                  | YES     | YES    |
| 27673         | 42.48         | 331.92                     | 453.95                     | 274.07                     | 246.21        | 1.66            | 2.00            | 1.16            | 640.8935              | 2                  | 0.0709              | VENLNFNEK                 | iTRAQ4plex (K); iTRAQ4plex (N-term)                  | YES     | YES    |
| 31085         | 51.29         | 600.69                     | 715.72                     | 414.93                     | 394.61        | 1.88            | 1.97            | 1.10            | 662.4055              | 2                  | 0.0276              | ILDSAEFIK                 | iTRAQ4plex (K); iTRAQ4plex (N-term)                  | YES     | YES    |
| 31087         | 56.54         | 1697.75                    | 1612.56                    | 1073.74                    | 1064.07       | 1.97            | 1.65            | 1.05            | 662.4090              | 2                  | 0.0344              | ILDSAEFIK                 | iTRAQ4plex (K); iTRAQ4plex (N-term)                  | YES     | YES    |
| 37120         | 59.55         | 374.57                     | 421.44                     | 208.64                     | 200.19        | 2.31            | 2.29            | 1.09            | 699.3852              | 2                  | 0.0416              | APSYLEISSMR               | iTRAQ4plex (N-term)                                  | YES     | YES    |
| 37916         | 54.78         | 1156.01                    | 1049.28                    | 627.54                     | 684.71        | 2.08            | 1.67            | 0.95            | 703.9309              | 2                  | 0.0412              | STWVPVPYK                 | iTRAQ4plex (K); iTRAQ4plex (N-term)                  | YES     | YES    |
| 38313         | 46.84         | 1621.53                    | 1623.28                    | 1030.89                    | 1123.99       | 1.78            | 1.57            | 0.96            | 706.4094              | 2                  | 0.0443              | FAEALGSTEAK               | iTRAQ4plex (K); iTRAQ4plex (N-term)                  | YES     | YES    |
| 42493         | 52.26         | 1729.08                    | 1895.90                    | 1260.72                    | 1266.37       | 1.69            | 1.63            | 1.04            | 489.2937              | 3                  | 0.0413              | KQVEELFER                 | iTRAQ4plex (K); iTRAQ4plex (N-term)                  | YES     | YES    |
| 42496         | 43.08         | 594.03                     | 698.50                     | 466.28                     | 460.32        | 1.59            | 1.65            | 1.06            | 489.2954              | 3                  | 0.0464              | KQVEELFER                 | iTRAQ4plex (K); iTRAQ4plex (N-term)                  | YES     | YES    |
| 45424         | 70.25         | 711.25                     | 787.50                     | 500.21                     | 531.70        | 1.65            | 1.61            | 0.98            | 753.9290              | 2                  | 0.0553              | MSVDAVEIETLR              | iTRAQ4plex (N-term)                                  | YES     | YES    |
| 46251         | 46.34         | 902.52                     | 1023.84                    | 577.26                     | 590.00        | 1.89            | 1.89            | 1.02            | 758.9087              | 2                  | 0.0427              | EFSEAWNAK                 | iTRAQ4plex (K); iTRAQ4plex (N-term)                  | YES     | YES    |
| 47649         | 71.45         | 878.38                     | 830.88                     | 425.95                     | 519.00        | 2.09            | 1.74            | 0.85            | 768.4518              | 2                  | -0.0071             | FAQALGLTEAVK              | iTRAQ4plex (K); iTRAQ4plex (N-term)                  | YES     | YES    |
| 47654         | 64.35         | 814.36                     | 881.78                     | 454.77                     | 530.65        | 1.89            | 1.81            | 0.89            | 768.4554              | 2                  | -0.0001             | FAQALGLTEAVK              | iTRAQ4plex (K); iTRAQ4plex (N-term)                  | YES     | YES    |
| 47667         | 74.89         | 1183.60                    | 1319.93                    | 713.57                     | 828.57        | 1.76            | 1.73            | 0.90            | 768.4786              | 2                  | 0.0464              | FAQALGLTEAVK              | iTRAQ4plex (K); iTRAQ4plex (N-term)                  | YES     | YES    |
| 47670         | 77.52         | 1290.98                    | 1301.07                    | 699.55                     | 775.22        | 2.06            | 1.82            | 0.94            | 768.4804              | 2                  | 0.0499              | FAQALGLTEAVK              | iTRAQ4plex (K); iTRAQ4plex (N-term)                  | YES     | YES    |
| 50992         | 50.11         | 1028.47                    | 1026.46                    | 704.29                     | 729.28        | 1.74            | 1.53            | 1.01            | 530.3050              | 3                  | 0.0431              | HPENYDLATLK               | iTRAQ4plex (K); iTRAQ4plex (N-term)                  | YES     | YES    |
| 50994         | 40.84         | 993.92                     | 1053.84                    | 723.10                     | 822.41        | 1.49            | 1.39            | 0.92            | 530.3070              | 3                  | 0.0491              | HPENYDLATLK               | iTRAQ4plex (K); iTRAQ4plex (N-term)                  | YES     | YES    |
| 53447         | 57.21         | 1253.74                    | 1212.92                    | 743.56                     | 800.33        | 1.93            | 1.65            | 0.97            | 542.6449              | 3                  | -0.0094             | KPEMFETAIK                | 2 iTRAQ4plex (K); iTRAQ4plex (N-term)                | YES     | YES    |
| 53448         | 43.91         | 983.29                     | 1035.68                    | 655.50                     | 638.47        | 1.90            | 1.76            | 1.07            | 542.6510              | 3                  | 0.0088              | KPEMFETAIK                | 2 iTRAQ4plex (K); iTRAQ4plex (N-term)                | YES     | YES    |
| 54537         | 53.04         | 1669.66                    | 1616.81                    | 1085.46                    | 1116.54       | 1.85            | 1.57            | 1.01            | 547.9842              | 3                  | 0.0135              | KPEMFETAIK                | 2 iTRAQ4plex (K); iTRAQ4plex (N-term); Oxidation (M) | YES     | YES    |
| 56906         | 43.36         | 1192.25                    | 1237.32                    | 751.73                     | 789.93        | 1.86            | 1.70            | 0.99            | 560.6945              | 3                  | 0.0632              | KQVEEIFNLK                | 2 iTRAQ4plex (K); iTRAQ4plex (N-term)                | YES     | YES    |
| 56909         | 41.24         | 627.66                     | 666.76                     | 424.32                     | 477.24        | 1.62            | 1.52            | 0.93            | 560.7014              | 3                  | 0.0840              | KQVEEIFNLK                | 2 iTRAQ4plex (K); iTRAQ4plex (N-term)                | YES     | YES    |
| 57156         | 41.22         | 708.73                     | 613.34                     | 637.93                     | 707.68        | 1.24            | 0.94            | 0.94            | 561.9888              | 3                  | -0.0123             | KFAEALGSTEAK              | 2 iTRAQ4plex (K); iTRAQ4plex (N-term)                | YES     | YES    |
| 65647         | 41.07         | 327.18                     | 390.79                     | 349.75                     | 417.87        | 0.97            | 1.02            | 0.87            | 610.3448              | 3                  | -0.0156             | KFGAEIGMGFPVK             | 2 iTRAQ4plex (K); iTRAQ4plex (N-term); Oxidation (M) | YES     | YES    |
| 65653         | 40.68         | 576.56                     | 672.01                     | 448.01                     | 530.17        | 1.34            | 1.38            | 0.88            | 610.3515              | 3                  | 0.0045              | KFGAEIGMGFPVK             | 2 iTRAQ4plex (K); iTRAQ4plex (N-term); Oxidation (M) | YES     | YES    |
| 65813         | 41.44         | 928.29                     | 985.58                     | 664.91                     | 701.09        | 1.63            | 1.53            | 0.99            | 611.3697              | 3                  | 0.0458              | EDTLQDKPASGVK             | 2 iTRAQ4plex (K); iTRAQ4plex (N-term)                | YES     | YES    |
| 71044         | 53.58         | 522.31                     | 534.44                     | 344.39                     | 415.97        | 1.55            | 1.40            | 0.86            | 645.0409              | 3                  | 0.0700              | TPQTNGSNVFPKPR            | Deamidated (NQ); iTRAQ4plex (K); iTRAQ4plex (N-term) | YES     | YES    |
| 74419         | 43.17         | 116.98                     | 150.96                     | 101.62                     | 92.28         | 1.57            | 1.78            | 1.15            | 670.3613              | 3                  | -0.0202             | RPELLTHSTTEVTQPR          | iTRAQ4plex (N-term)                                  | YES     | YES    |
| 74422         | 42.3          | 188.68                     | 266.20                     | 184.34                     | 134.44        | 1.73            | 2.15            | 1.43            | 670.3637              | 3                  | -0.0131             | RPELLTHSTTEVTQPR          | iTRAQ4plex (N-term)                                  | YES     | YES    |
| 80861         | 51.59         | 219.22                     | 189.17                     | 124.92                     | 151.19        | 1.79            | 1.36            | 0.86            | 721.4510              | 3                  | 0.0767              | KPELVISYLPPGMASK          | 2 iTRAQ4plex (K); iTRAQ4plex (N-term)                | YES     | YES    |
| 80862         | 57.32         | 140.83                     | 158.59                     | 131.88                     | 148.91        | 1.17            | 1.16            | 0.92            | 721.4590              | 3                  | 0.1007              | KPELVISYLPPGMASK          | 2 iTRAQ4plex (K); iTRAQ4plex (N-term)                | YES     | YES    |
| 80863         | 52.74         | 453.09                     | 495.47                     | 348.60                     | 343.82        | 1.63            | 1.57            | 1.06            | 721.4605              | 3                  | 0.1051              | KPELVISYLPPGMASK          | 2 iTRAQ4plex (K); iTRAQ4plex (N-term)                | YES     | YES    |
| 90989         | 42.94         | 187.92                     | 203.85                     | 132.17                     | 100.85        | 2.30            | 2.20            | 1.37            | 834.4447              | 3                  | 0.0613              | FEAHPNDLYVEGLPENIPFR      | iTRAQ4plex (N-term)                                  | YES     | YES    |

### Upstream-binding protein 1 - Homo sapiens (Human)

| Accession No. | Protein Score | Normalized Ratio (114/117) | Normalized Ratio (115/117) | Normalized Ratio (116/117) | STD (114/117) | STD (115/117)   | STD (116/117)   | Mass            | Sequence Coverage (%) | Identified Peptide | Quantitated Peptide | Identified Unique Peptide |                                     |         |        |
|---------------|---------------|----------------------------|----------------------------|----------------------------|---------------|-----------------|-----------------|-----------------|-----------------------|--------------------|---------------------|---------------------------|-------------------------------------|---------|--------|
| Q9NZI7        | 582           | 1.88                       | 1.73                       | 0.98                       | 0.19          | 0.19            | 0.10            | 60453           | 18.1                  | 20                 | 12                  | 7                         |                                     |         |        |
| Spectrum No.  | Peptide Score | Int. 114                   | Int. 115                   | Int. 116                   | Int. 117      | Ratio (114/117) | Ratio (115/117) | Ratio (116/117) | Precursor m/z (Da)    | Charge             | Mass Error (Da)     | Peptide Sequence          | Modification                        | Labeled | Unique |
| 16296         | 42.41         | 907.87                     | 1056.56                    | 674.43                     | 639.59        | 1.75            | 1.80            | 1.10            | 569.8595              | 2                  | 0.0407              | IQVDTFK                   | iTRAQ4plex (K); iTRAQ4plex (N-term) | YES     | YES    |
| 51716         | 52.75         | 1030.67                    | 966.62                     | 565.38                     | 610.59        | 2.08            | 1.72            | 0.96            | 800.4513              | 2                  | -0.0030             | LFSNFGADLLK               | iTRAQ4plex (K); iTRAQ4plex (N-term) | YES     | YES    |
| 51724         | 50.01         | 0.00                       | 0.00                       | 0.00                       | 0.00          | 0.00            | 0.00            | 0.00            | 800.4773              | 2                  | 0.0489              | LFSNFGADLLK               | iTRAQ4plex (K); iTRAQ4plex (N-term) | YES     | YES    |
| 51727         | 65.98         | 0.00                       | 0.00                       | 0.00                       | 0.00          | 0.00            | 0.00            | 0.00            | 800.4872              | 2                  | 0.0686              | LFSNFGADLLK               | iTRAQ4plex (K); iTRAQ4plex (N-term) | YES     | YES    |
| 71325         | 63.7          | 820.86                     | 907.18                     | 495.73                     | 520.79        | 1.95            | 1.89            | 0.99            | 646.7066              | 3                  | 0.0632              | LEPIEDAVEHEQK             | iTRAQ4plex (K); iTRAQ4plex (N-term) | YES     | YES    |
| 71329         | 48.19         | 306.14                     | 293.21                     | 150.69                     | 206.93        | 1.83            | 1.54            | 0.76            | 646.7135              | 3                  | 0.0838              | LEPIEDAVEHEQK             | iTRAQ4plex (K); iTRAQ4plex (N-term) | YES     | YES    |
| 71334         | 50.87         | 537.45                     | 577.56                     | 377.44                     | 403.44        | 1.64            | 1.56            | 0.97            | 646.7258              | 3                  | 0.1205              | LEPIEDAVEHEQK             | iTRAQ4plex (K); iTRAQ4plex (N-term) | YES     | YES    |
| 71770         | 47.47         | 861.24                     | 837.85                     | 525.26                     | 577.53        | 1.84            | 1.58            | 0.95            | 650.0415              | 3                  | 0.0933              | LQYTEHQLEGWK              | iTRAQ4plex (K); iTRAQ4plex (N-term) | YES     | YES    |
| 81689         | 41.66         | 182.56                     | 172.04                     | 102.83                     | 104.20        | 2.16            | 1.79            | 1.03            | 728.1075              | 3                  | 0.0462              | LALVFNIPHLHINQVYR         | iTRAQ4plex (N-term)                 | YES     | YES    |
| 81692         | 40.03         | 160.39                     | 180.63                     | 93.62                      | 98.61         | 2.01            | 1.99            | 0.99            | 728.1129              | 3                  | 0.0624              | LALVFNIPHLHINQVYR         | iTRAQ4plex (N-term)                 | YES     | YES    |
| 81693         | 51.02         | 155.68                     | 165.79                     | 97.63                      | 94.44         | 2.04            | 1.91            | 1.08            | 728.1151              | 3                  | 0.0690              | LALVFNIPHLHINQVYR         | iTRAQ4plex (N-term)                 | YES     | YES    |
| 81699         | 60.05         | 154.66                     | 166.97                     | 93.48                      | 96.63         | 1.98            | 1.88            | 1.01            | 728.1321              | 3                  | 0.1200              | LALVFNIPHLHINQVYR         | iTRAQ4plex (N-term)                 | YES     | YES    |
| 81701         | 61.67         | 85.11                      | 94.65                      | 42.57                      | 48.99         | 2.14            | 2.10            | 0.91            | 728.1362              | 3                  | 0.1323              | LALVFNIPHLHINQVYR         | iTRAQ4plex (N-term)                 | YES     | YES    |
| 83104         | 53.65         | 200.67                     | 216.40                     | 120.31                     | 154.37        | 1.60            | 1.52            | 0.81            | 740.1137              | 3                  | 0.1519              | TNPSQLNAVEFLWDPK          | iTRAQ4plex (K); iTRAQ4plex (N-term) | YES     | YES    |
| 86413         | 65.05         | 116.55                     | 172.58                     | 114.20                     | 122.69        | 1.17            | 1.53            | 0.97            | 775.4138              | 3                  | 0.0629              | LHDETLTYLNQGQSYEIR        | iTRAQ4plex (N-term)                 | YES     | NO     |
| 86414         | 53.71         | 188.46                     | 327.14                     | 186.21                     | 152.29        | 1.53            | 2.33            | 1.27            | 775.4156              | 3                  | 0.0685              | LHDETLTYLNQGQSYEIR        | iTRAQ4plex (N-term)                 | YES     | NO     |
| 86415         | 66.25         | 587.87                     | 856.66                     | 442.12                     | 393.25        | 1.85            | 2.37            | 1.17            | 775.4198              | 3                  | 0.0811              | LHDETLTYLNQGQSYEIR        | iTRAQ4plex (N-term)                 | YES     | NO     |
| 86416         | 86.77         | 0.00                       | 0.00                       | 0.00                       | 0.00          | 0.00            | 0.00            | 0.00            | 775.4209              | 3                  | 0.0843              | LHDETLTYLNQGQSYEIR        | iTRAQ4plex (N-term)                 | YES     | NO     |
| 86417         | 52.7          | 99.71                      | 164.57                     | 82.18                      | 85.14         | 1.45            | 2.10            | 1.01            | 775.4307              | 3                  | 0.1136              | LHDETLTYLNQGQSYEIR        | iTRAQ4plex (N-term)                 | YES     | NO     |
| 86422         | 54.88         | 161.21                     | 239.34                     | 134.01                     | 131.73        | 1.51            | 1.97            | 1.06            | 775.4484              | 3                  | 0.1666              | LHDETLTYLNQGQSYEIR        | iTRAQ4plex (N-term)                 | YES     | NO     |

### COUP transcription factor 1 - Homo sapiens (Human)

| Accession No. | Protein Score | Normalized Ratio (114/117) | Normalized Ratio (115/117) | Normalized Ratio (116/117) | STD (114/117) | STD (115/117)   | STD (116/117)   | Mass            | Sequence Coverage (%) | Identified Peptide | Quantitated Peptide | Identified Unique Peptide               |                                                      |         |        |
|---------------|---------------|----------------------------|----------------------------|----------------------------|---------------|-----------------|-----------------|-----------------|-----------------------|--------------------|---------------------|-----------------------------------------|------------------------------------------------------|---------|--------|
| P10589        | 143           | 2.13                       | 1.94                       | 1.17                       | 0.56          | 0.49            | 0.21            | 46126           | 16.8                  | 7                  | 3                   | 4                                       |                                                      |         |        |
| Spectrum No.  | Peptide Score | Int. 114                   | Int. 115                   | Int. 116                   | Int. 117      | Ratio (114/117) | Ratio (115/117) | Ratio (116/117) | Precursor m/z (Da)    | Charge             | Mass Error (Da)     | Peptide Sequence                        | Modification                                         | Labeled | Unique |
| 29854         | 43.81         | 2751.62                    | 2668.99                    | 1632.44                    | 1689.87       | 2.01            | 1.72            | 1.01            | 654.8979              | 2                  | 0.0483              | IFQEQVEK                                | iTRAQ4plex (K); iTRAQ4plex (N-term)                  | YES     | NO     |
| 29855         | 53.47         | 2511.68                    | 2515.94                    | 1604.31                    | 1744.29       | 1.78            | 1.57            | 0.96            | 654.8999              | 2                  | 0.0523              | IFQEQVEK                                | iTRAQ4plex (K); iTRAQ4plex (N-term)                  | YES     | NO     |
| 32032         | 49.94         | 287.94                     | 302.77                     | 201.44                     | 200.63        | 1.77            | 1.64            | 1.05            | 668.4014              | 2                  | 0.0414              | LLFSAVEWAR                              | iTRAQ4plex (N-term)                                  | YES     | YES    |
| 32038         | 42.43         | 237.93                     | 253.27                     | 152.63                     | 117.88        | 2.49            | 2.34            | 1.35            | 668.4049              | 2                  | 0.0484              | LLFSAVEWAR                              | iTRAQ4plex (N-term)                                  | YES     | YES    |
| 61257         | 47.07         | 256.77                     | 211.72                     | 132.96                     | 141.81        | 2.24            | 1.62            | 0.98            | 878.5058              | 2                  | 0.0283              | TVSSSVIEQLFFVR                          | iTRAQ4plex (N-term)                                  | YES     | NO     |
| 61276         | 66.86         | 0.00                       | 0.00                       | 0.00                       | 0.00          | 0.00            | 0.00            | 0.00            | 878.5308              | 2                  | 0.0782              | TVSSSVIEQLFFVR                          | iTRAQ4plex (N-term)                                  | YES     | NO     |
| 101859        | 45.59         | 42.42                      | 29.01                      | 15.56                      | 18.27         | 2.87            | 1.73            | 0.89            | 943.3000              | 4                  | 0.3777              | GGGGGAGEQQQQAGSGAPHTPQTGPQGPAPATPGTAGDK | Deamidated (NQ); iTRAQ4plex (K); iTRAQ4plex (N-term) | YES     | YES    |

### COUP transcription factor 2 - Homo sapiens (Human)

| Accession No. | Protein Score | Normalized Ratio (114/117) | Normalized Ratio (115/117) | Normalized Ratio (116/117) | STD (114/117) | STD (115/117)   | STD (116/117)   | Mass            | Sequence Coverage (%) | Identified Peptide | Quantitated Peptide | Identified Unique Peptide |                                     |         |        |
|---------------|---------------|----------------------------|----------------------------|----------------------------|---------------|-----------------|-----------------|-----------------|-----------------------|--------------------|---------------------|---------------------------|-------------------------------------|---------|--------|
| P24468        | 136           | 1.99                       | 1.78                       | 0.97                       | -             | -               | -               | 45542           | 7.7                   | 5                  | 1                   | 3                         |                                     |         |        |
| Spectrum No.  | Peptide Score | Int. 114                   | Int. 115                   | Int. 116                   | Int. 117      | Ratio (114/117) | Ratio (115/117) | Ratio (116/117) | Precursor m/z (Da)    | Charge             | Mass Error (Da)     | Peptide Sequence          | Modification                        | Labeled | Unique |
| 29854         | 43.81         | 2751.62                    | 2668.99                    | 1632.44                    | 1689.87       | 2.01            | 1.72            | 1.01            | 654.8979              | 2                  | 0.0483              | IFQEQVEK                  | iTRAQ4plex (K); iTRAQ4plex (N-term) | YES     | NO     |
| 29855         | 53.47         | 2511.68                    | 2515.94                    | 1604.31                    | 1744.29       | 1.78            | 1.57            | 0.96            | 654.8999              | 2                  | 0.0523              | IFQEQVEK                  | iTRAQ4plex (K); iTRAQ4plex (N-term) | YES     | NO     |
| 33441         | 62.75         | 945.78                     | 961.18                     | 547.87                     | 585.38        | 1.99            | 1.78            | 0.97            | 677.3616              | 2                  | 0.0053              | MLFSAVEWAR                | iTRAQ4plex (N-term)                 | YES     | YES    |
| 61257         | 47.07         | 256.77                     | 211.72                     | 132.96                     | 141.81        | 2.24            | 1.62            | 0.98            | 878.5058              | 2                  | 0.0283              | TVSSSVIEQLFFVR            | iTRAQ4plex (N-term)                 | YES     | NO     |
| 61276         | 66.86         | 0.00                       | 0.00                       | 0.00                       | 0.00          | 0.00            | 0.00            | 0.00            | 878.5308              | 2                  | 0.0782              | TVSSSVIEQLFFVR            | iTRAQ4plex (N-term)                 | YES     | NO     |

### Nuclear factor 1 C-type - Homo sapiens (Human)

| Accession No. | Protein Score | Normalized Ratio (114/117) | Normalized Ratio (115/117) | Normalized Ratio (116/117) | STD (114/117) | STD (115/117) | STD (116/117) | Mass | Sequence Coverage (%) | Identified Peptide | Quantitated Peptide | Identified Unique Peptide |
|---------------|---------------|----------------------------|----------------------------|----------------------------|---------------|---------------|---------------|------|-----------------------|--------------------|---------------------|---------------------------|
|---------------|---------------|----------------------------|----------------------------|----------------------------|---------------|---------------|---------------|------|-----------------------|--------------------|---------------------|---------------------------|

| P08651       | 175           | 1.73     | 1.75     | 0.91     | 0.06     | 0.05            | 0.03            | 55640           | 10.4               | 6      | 2               | 2                               |                                     |         |        |
|--------------|---------------|----------|----------|----------|----------|-----------------|-----------------|-----------------|--------------------|--------|-----------------|---------------------------------|-------------------------------------|---------|--------|
| Spectrum No. | Peptide Score | Int. 114 | Int. 115 | Int. 116 | Int. 117 | Ratio (114/117) | Ratio (115/117) | Ratio (116/117) | Precursor m/z (Da) | Charge | Mass Error (Da) | Peptide Sequence                | Modification                        | Labeled | Unique |
| 37041        | 45.35         | 850.15   | 892.39   | 722.98   | 758.57   | 1.38            | 1.28            | 0.99            | 698.8873           | 2      | -0.0252         | EDFVLSITGK                      | iTRAQ4plex (K); iTRAQ4plex (N-term) | YES     | NO     |
| 37052        | 76.46         | 1011.61  | 1019.59  | 795.23   | 866.19   | 1.44            | 1.28            | 0.96            | 698.9044           | 2      | 0.0089          | EDFVLSITGK                      | iTRAQ4plex (K); iTRAQ4plex (N-term) | YES     | NO     |
| 37065        | 60.91         | 739.60   | 720.23   | 616.45   | 643.54   | 1.42            | 1.22            | 1.00            | 698.9293           | 2      | 0.0586          | EDFVLSITGK                      | iTRAQ4plex (K); iTRAQ4plex (N-term) | YES     | NO     |
| 48420        | 54.01         | 0.00     | 0.00     | 0.00     | 0.00     | 0.00            | 0.00            | 0.00            | 773.4587           | 2      | 0.0669          | ELDLYLAYFVR                     | iTRAQ4plex (N-term)                 | YES     | YES    |
| 100697       | 45.96         | 125.26   | 137.17   | 78.58    | 87.33    | 1.77            | 1.71            | 0.94            | 857.4732           | 4      | 0.0934          | TPVVTGTGPNFSLGELQGHAYDLNPASTGLR | iTRAQ4plex (N-term)                 | YES     | YES    |
| 100700       | 54.04         | 129.88   | 155.81   | 81.21    | 95.19    | 1.68            | 1.78            | 0.89            | 857.5048           | 4      | 0.2201          | TPVVTGTGPNFSLGELQGHAYDLNPASTGLR | iTRAQ4plex (N-term)                 | YES     | YES    |

### Cellular tumor antigen p53 - Homo sapiens (Human)

| Accession No. | Protein Score | Normalized Ratio (114/117) | Normalized Ratio (115/117) | Normalized Ratio (116/117) | STD (114/117) | STD (115/117)   | STD (116/117)   | Mass            | Sequence Coverage (%) | Identified Peptide | Quantitated Peptide | Identified Unique Peptide |                     |         |        |
|---------------|---------------|----------------------------|----------------------------|----------------------------|---------------|-----------------|-----------------|-----------------|-----------------------|--------------------|---------------------|---------------------------|---------------------|---------|--------|
| Spectrum No.  | Peptide Score | Int. 114                   | Int. 115                   | Int. 116                   | Int. 117      | Ratio (114/117) | Ratio (115/117) | Ratio (116/117) | Precursor m/z (Da)    | Charge             | Mass Error (Da)     | Peptide Sequence          | Modification        | Labeled | Unique |
| P04637        | 96            | 1.13                       | 1.29                       | 1.47                       | -             | -               | -               | 43625           | 4.8                   | 3                  | 1                   | 1                         |                     |         |        |
| 82919         | 42.74         | 20.52                      | 24.18                      | 19.84                      | 19.08         | 1.33            | 1.38            | 1.08            | 738.0990              | 3                  | 0.0043              | RPILTIITLEDSSGNLLGR       | iTRAQ4plex (N-term) | YES     | YES    |
| 82923         | 56.82         | 49.71                      | 64.70                      | 77.10                      | 54.47         | 1.13            | 1.29            | 1.47            | 738.1145              | 3                  | 0.0509              | RPILTIITLEDSSGNLLGR       | iTRAQ4plex (N-term) | YES     | YES    |
| 82926         | 54.83         | 9.79                       | 10.63                      | 25.91                      | 11.82         | 1.02            | 0.98            | 2.28            | 738.1287              | 3                  | 0.0933              | RPILTIITLEDSSGNLLGR       | iTRAQ4plex (N-term) | YES     | YES    |

### Zinc finger and BTB domain-containing protein 7B - Homo sapiens (Human)

| Accession No. | Protein Score | Normalized Ratio (114/117) | Normalized Ratio (115/117) | Normalized Ratio (116/117) | STD (114/117) | STD (115/117)   | STD (116/117)   | Mass            | Sequence Coverage (%) | Identified Peptide | Quantitated Peptide | Identified Unique Peptide  |                                     |         |        |
|---------------|---------------|----------------------------|----------------------------|----------------------------|---------------|-----------------|-----------------|-----------------|-----------------------|--------------------|---------------------|----------------------------|-------------------------------------|---------|--------|
| Spectrum No.  | Peptide Score | Int. 114                   | Int. 115                   | Int. 116                   | Int. 117      | Ratio (114/117) | Ratio (115/117) | Ratio (116/117) | Precursor m/z (Da)    | Charge             | Mass Error (Da)     | Peptide Sequence           | Modification                        | Labeled | Unique |
| O15156        | 67            | 4.25                       | 4.19                       | 1.28                       | 0.74          | 0.95            | 0.26            | 57990           | 6.3                   | 2                  | 2                   | 2                          |                                     |         |        |
| 30028         | 48.88         | 971.72                     | 1064.07                    | 343.45                     | 300.48        | 3.99            | 3.85            | 1.19            | 437.5968              | 3                  | 0.0410              | FLHSYDLK                   | iTRAQ4plex (K); iTRAQ4plex (N-term) | YES     | YES    |
| 97861         | 46.43         | 327.34                     | 383.02                     | 119.69                     | 80.23         | 5.04            | 5.19            | 1.55            | 750.4330              | 4                  | 0.1712              | ANHLVPEVPTVPAHPLTYEEEEVAGR | iTRAQ4plex (N-term)                 | YES     | YES    |

### Transcription factor Sp3 - Homo sapiens (Human)

| Accession No. | Protein Score | Normalized Ratio (114/117) | Normalized Ratio (115/117) | Normalized Ratio (116/117) | STD (114/117) | STD (115/117)   | STD (116/117)   | Mass            | Sequence Coverage (%) | Identified Peptide | Quantitated Peptide | Identified Unique Peptide    |                                     |         |        |
|---------------|---------------|----------------------------|----------------------------|----------------------------|---------------|-----------------|-----------------|-----------------|-----------------------|--------------------|---------------------|------------------------------|-------------------------------------|---------|--------|
| Spectrum No.  | Peptide Score | Int. 114                   | Int. 115                   | Int. 116                   | Int. 117      | Ratio (114/117) | Ratio (115/117) | Ratio (116/117) | Precursor m/z (Da)    | Charge             | Mass Error (Da)     | Peptide Sequence             | Modification                        | Labeled | Unique |
| Q02447        | 110           | 2.60                       | 1.98                       | 1.02                       | 0.07          | 0.03            | 0.02            | 81876           | 5.6                   | 3                  | 2                   | 2                            |                                     |         |        |
| 78827         | 63.35         | 1230.81                    | 1059.70                    | 570.26                     | 573.28        | 2.65            | 2.01            | 1.04            | 705.0438              | 3                  | 0.0769              | VQVVDEEGDQQHQEGK             | iTRAQ4plex (K); iTRAQ4plex (N-term) | YES     | YES    |
| 78839         | 46.74         | 1333.66                    | 1166.91                    | 625.12                     | 646.70        | 2.55            | 1.96            | 1.01            | 705.0672              | 3                  | 0.1469              | VQVVDEEGDQQHQEGK             | iTRAQ4plex (K); iTRAQ4plex (N-term) | YES     | YES    |
| 101217        | 44.26         | 15.41                      | 29.69                      | 12.85                      | 11.39         | 1.67            | 2.83            | 1.18            | 889.4814              | 4                  | 0.1548              | IKEEPEPDEEWQLSGDSTLNTNDLTHLR | iTRAQ4plex (K); iTRAQ4plex (N-term) | YES     | YES    |

### Steroid hormone receptor ERR1 - Homo sapiens (Human)

| Accession No. | Protein Score | Normalized Ratio (114/117) | Normalized Ratio (115/117) | Normalized Ratio (116/117) | STD (114/117) | STD (115/117)   | STD (116/117)   | Mass            | Sequence Coverage (%) | Identified Peptide | Quantitated Peptide | Identified Unique Peptide |                     |         |        |
|---------------|---------------|----------------------------|----------------------------|----------------------------|---------------|-----------------|-----------------|-----------------|-----------------------|--------------------|---------------------|---------------------------|---------------------|---------|--------|
| Spectrum No.  | Peptide Score | Int. 114                   | Int. 115                   | Int. 116                   | Int. 117      | Ratio (114/117) | Ratio (115/117) | Ratio (116/117) | Precursor m/z (Da)    | Charge             | Mass Error (Da)     | Peptide Sequence          | Modification        | Labeled | Unique |
| P11474        | 50            | 1.76                       | 1.99                       | 1.18                       | -             | -               | -               | 55404           | 2.7                   | 1                  | 1                   | 1                         |                     |         |        |
| 60621         | 49.72         | 128.69                     | 165.26                     | 101.88                     | 90.25         | 1.76            | 1.99            | 1.18            | 582.3354              | 3                  | 0.0932              | EALHEALLEYEAGR            | iTRAQ4plex (N-term) | YES     | YES    |

### Transcriptional adapter 2-alpha - Homo sapiens (Human)

| Accession No. | Protein Score | Normalized Ratio (114/117) | Normalized Ratio (115/117) | Normalized Ratio (116/117) | STD (114/117) | STD (115/117)   | STD (116/117)   | Mass            | Sequence Coverage (%) | Identified Peptide | Quantitated Peptide | Identified Unique Peptide |                                     |         |        |
|---------------|---------------|----------------------------|----------------------------|----------------------------|---------------|-----------------|-----------------|-----------------|-----------------------|--------------------|---------------------|---------------------------|-------------------------------------|---------|--------|
| Spectrum No.  | Peptide Score | Int. 114                   | Int. 115                   | Int. 116                   | Int. 117      | Ratio (114/117) | Ratio (115/117) | Ratio (116/117) | Precursor m/z (Da)    | Charge             | Mass Error (Da)     | Peptide Sequence          | Modification                        | Labeled | Unique |
| O75478        | 57            | N/A                        | 2.10                       | N/A                        | N/A           | -               | N/A             | 51463           | 3.6                   | 2                  | 1                   | 1                         |                                     |         |        |
| 79729         | 40.45         | 32.18                      | 41.22                      | 28.96                      | 16.66         | 2.38            | 2.69            | 1.81            | 711.7353              | 3                  | 0.0960              | DIDFVEDDSDILHALK          | iTRAQ4plex (K); iTRAQ4plex (N-term) | YES     | YES    |

79730 45.71 27.09 45.46 30.46 23.58 1.42 2.10 1.35 711.7398 3 0.1094 DIDFVEDDSDILHALK iTRAQ4plex (K); iTRAQ4plex (N-term) YES YES

***Transcriptional repressor and corepressor***

**Zinc finger and BTB domain-containing protein 7A - Homo sapiens (Human)**

| Accession No. | Protein Score | Normalized Ratio (114/117) | Normalized Ratio (115/117) | Normalized Ratio (116/117) | STD (114/117) | STD (115/117)   | STD (116/117)   | Mass            | Sequence Coverage (%) | Identified Peptide | Quantitated Peptide | Identified Unique Peptide |                                       |         |        |
|---------------|---------------|----------------------------|----------------------------|----------------------------|---------------|-----------------|-----------------|-----------------|-----------------------|--------------------|---------------------|---------------------------|---------------------------------------|---------|--------|
| O95365        | 56            | 3.32                       | 3.09                       | 0.93                       | 0.26          | 0.17            | 0.16            | 61401           | 5.0                   | 2                  | 2                   | 2                         |                                       |         |        |
| Spectrum No.  | Peptide Score | Int. 114                   | Int. 115                   | Int. 116                   | Int. 117      | Ratio (114/117) | Ratio (115/117) | Ratio (116/117) | Precursor m/z (Da)    | Charge             | Mass Error (Da)     | Peptide Sequence          | Modification                          | Labeled | Unique |
| 66751         | 43.53         | 470.81                     | 509.74                     | 142.99                     | 188.06        | 3.09            | 2.95            | 0.79            | 617.3562              | 3                  | 0.0812              | ADDKGVMDYYLK              | 2 iTRAQ4plex (K); iTRAQ4plex (N-term) | YES     | YES    |
| 83041         | 40.27         | 756.20                     | 790.24                     | 262.46                     | 269.40        | 3.47            | 3.19            | 1.01            | 739.4004              | 3                  | 0.1216              | YFSGAHDGDVYPAWSQK         | iTRAQ4plex (K); iTRAQ4plex (N-term)   | YES     | YES    |

**C-terminal-binding protein 1 - Homo sapiens (Human)**

| Accession No. | Protein Score | Normalized Ratio (114/117) | Normalized Ratio (115/117) | Normalized Ratio (116/117) | STD (114/117) | STD (115/117)   | STD (116/117)   | Mass            | Sequence Coverage (%) | Identified Peptide | Quantitated Peptide | Identified Unique Peptide |                                     |         |        |
|---------------|---------------|----------------------------|----------------------------|----------------------------|---------------|-----------------|-----------------|-----------------|-----------------------|--------------------|---------------------|---------------------------|-------------------------------------|---------|--------|
| Q13363        | 177           | 1.68                       | 1.71                       | 1.01                       | 0.38          | 0.12            | 0.11            | 47505           | 6.6                   | 5                  | 5                   | 2                         |                                     |         |        |
| Spectrum No.  | Peptide Score | Int. 114                   | Int. 115                   | Int. 116                   | Int. 117      | Ratio (114/117) | Ratio (115/117) | Ratio (116/117) | Precursor m/z (Da)    | Charge             | Mass Error (Da)     | Peptide Sequence          | Modification                        | Labeled | Unique |
| 42555         | 46.95         | 682.69                     | 765.29                     | 497.87                     | 497.83        | 1.69            | 1.67            | 1.04            | 733.9210              | 2                  | 0.0254              | IGSGFDNIDIK               | iTRAQ4plex (K); iTRAQ4plex (N-term) | YES     | YES    |
| 80242         | 54.16         | 104.20                     | 90.22                      | 52.48                      | 56.55         | 2.27            | 1.73            | 0.97            | 716.0855              | 3                  | 0.0608              | VLNEAVGALMYHTITLTR        | iTRAQ4plex (N-term)                 | YES     | YES    |
| 80244         | 66.88         | 64.73                      | 113.62                     | 49.92                      | 64.64         | 1.24            | 1.91            | 0.80            | 716.0885              | 3                  | 0.0698              | VLNEAVGALMYHTITLTR        | iTRAQ4plex (N-term)                 | YES     | YES    |
| 80248         | 55.98         | 89.49                      | 125.31                     | 77.87                      | 73.37         | 1.51            | 1.86            | 1.11            | 716.0946              | 3                  | 0.0881              | VLNEAVGALMYHTITLTR        | iTRAQ4plex (N-term)                 | YES     | YES    |
| 80251         | 58.89         | 99.64                      | 117.94                     | 70.05                      | 78.73         | 1.56            | 1.63            | 0.93            | 716.0991              | 3                  | 0.1018              | VLNEAVGALMYHTITLTR        | iTRAQ4plex (N-term)                 | YES     | YES    |

**Protein Wiz - Homo sapiens (Human)**

| Accession No. | Protein Score | Normalized Ratio (114/117) | Normalized Ratio (115/117) | Normalized Ratio (116/117) | STD (114/117) | STD (115/117)   | STD (116/117)   | Mass            | Sequence Coverage (%) | Identified Peptide | Quantitated Peptide | Identified Unique Peptide |                                       |         |        |
|---------------|---------------|----------------------------|----------------------------|----------------------------|---------------|-----------------|-----------------|-----------------|-----------------------|--------------------|---------------------|---------------------------|---------------------------------------|---------|--------|
| O95785        | 801           | 1.68                       | 1.61                       | 1.01                       | 0.30          | 0.25            | 0.12            | 178563          | 9.4                   | 35                 | 26                  | 11                        |                                       |         |        |
| Spectrum No.  | Peptide Score | Int. 114                   | Int. 115                   | Int. 116                   | Int. 117      | Ratio (114/117) | Ratio (115/117) | Ratio (116/117) | Precursor m/z (Da)    | Charge             | Mass Error (Da)     | Peptide Sequence          | Modification                          | Labeled | Unique |
| 10862         | 58.32         | 0.00                       | 0.00                       | 0.00                       | 0.00          | 0.00            | 0.00            | 0.00            | 529.3621              | 2                  | 0.0310              | LLPAEVK                   | iTRAQ4plex (K); iTRAQ4plex (N-term)   | YES     | NO     |
| 10864         | 45.83         | 1155.91                    | 1204.53                    | 813.15                     | 877.20        | 1.63            | 1.49            | 0.97            | 529.3623              | 2                  | 0.0313              | LLPAEVK                   | iTRAQ4plex (K); iTRAQ4plex (N-term)   | YES     | NO     |
| 32558         | 41.44         | 539.71                     | 614.55                     | 374.32                     | 379.54        | 1.76            | 1.76            | 1.03            | 671.9131              | 2                  | 0.0217              | FVGNITYTLK                | iTRAQ4plex (K); iTRAQ4plex (N-term)   | YES     | YES    |
| 32559         | 60.52         | 1418.63                    | 1368.60                    | 826.78                     | 893.43        | 1.96            | 1.67            | 0.96            | 671.9148              | 2                  | 0.0251              | FVGNITYTLK                | iTRAQ4plex (K); iTRAQ4plex (N-term)   | YES     | YES    |
| 37881         | 43.88         | 51.12                      | 43.78                      | 39.04                      | 35.20         | 1.79            | 1.35            | 1.16            | 703.8676              | 2                  | 0.0213              | EDMTPLNLSSR               | iTRAQ4plex (N-term)                   | YES     | YES    |
| 37886         | 52.82         | 596.24                     | 638.23                     | 373.28                     | 394.56        | 1.87            | 1.76            | 0.99            | 703.8818              | 2                  | 0.0497              | EDMTPLNLSSR               | iTRAQ4plex (N-term)                   | YES     | YES    |
| 44322         | 50.92         | 466.09                     | 545.40                     | 357.47                     | 376.37        | 1.53            | 1.58            | 0.99            | 497.6435              | 3                  | 0.0227              | GLGHPPSSPLLK              | iTRAQ4plex (K); iTRAQ4plex (N-term)   | YES     | YES    |
| 44336         | 45.99         | 182.31                     | 184.42                     | 123.38                     | 123.26        | 1.83            | 1.63            | 1.04            | 497.6527              | 3                  | 0.0502              | GLGHPPSSPLLK              | iTRAQ4plex (K); iTRAQ4plex (N-term)   | YES     | YES    |
| 44339         | 47.02         | 496.25                     | 537.74                     | 321.77                     | 327.98        | 1.87            | 1.78            | 1.02            | 497.6551              | 3                  | 0.0575              | GLGHPPSSPLLK              | iTRAQ4plex (K); iTRAQ4plex (N-term)   | YES     | YES    |
| 47030         | 45.04         | 1334.06                    | 1397.27                    | 997.94                     | 1078.70       | 1.53            | 1.41            | 0.96            | 764.4574              | 2                  | 0.0415              | TYIQTELPFK                | iTRAQ4plex (K); iTRAQ4plex (N-term)   | YES     | YES    |
| 55972         | 49.09         | 62.90                      | 55.18                      | 68.79                      | 49.85         | 1.56            | 1.20            | 1.44            | 555.3491              | 3                  | 0.0240              | RPSLGLAPGGLAVVGR          | iTRAQ4plex (N-term)                   | YES     | YES    |
| 55973         | 49.9          | 70.31                      | 84.73                      | 68.72                      | 59.82         | 1.45            | 1.54            | 1.20            | 555.3604              | 3                  | 0.0579              | RPSLGLAPGGLAVVGR          | iTRAQ4plex (N-term)                   | YES     | YES    |
| 55974         | 70.05         | 171.14                     | 192.98                     | 189.64                     | 230.27        | 0.92            | 0.91            | 0.86            | 555.3627              | 3                  | 0.0646              | RPSLGLAPGGLAVVGR          | iTRAQ4plex (N-term)                   | YES     | YES    |
| 55976         | 46.44         | 136.38                     | 181.02                     | 159.32                     | 156.65        | 1.07            | 1.26            | 1.06            | 555.3639              | 3                  | 0.0683              | RPSLGLAPGGLAVVGR          | iTRAQ4plex (N-term)                   | YES     | YES    |
| 58944         | 57.87         | 898.07                     | 1046.38                    | 729.64                     | 749.12        | 1.48            | 1.52            | 1.01            | 571.6904              | 3                  | -0.0068             | KTPLALAGSPTPK             | 2 iTRAQ4plex (K); iTRAQ4plex (N-term) | YES     | YES    |
| 58954         | 48.9          | 608.81                     | 709.72                     | 527.10                     | 548.57        | 1.37            | 1.41            | 1.00            | 571.6979              | 3                  | 0.0158              | KTPLALAGSPTPK             | 2 iTRAQ4plex (K); iTRAQ4plex (N-term) | YES     | YES    |
| 60593         | 49.68         | 596.40                     | 629.92                     | 450.77                     | 369.09        | 1.99            | 1.86            | 1.27            | 582.0267              | 3                  | 0.0296              | GLPDAHLGLPPGLAK           | iTRAQ4plex (K); iTRAQ4plex (N-term)   | YES     | YES    |
| 60595         | 42.58         | 627.17                     | 591.53                     | 434.51                     | 427.86        | 1.81            | 1.50            | 1.06            | 582.0300              | 3                  | 0.0396              | GLPDAHLGLPPGLAK           | iTRAQ4plex (K); iTRAQ4plex (N-term)   | YES     | YES    |
| 60596         | 49.93         | 215.24                     | 238.05                     | 169.75                     | 162.12        | 1.64            | 1.60            | 1.09            | 582.0303              | 3                  | 0.0403              | GLPDAHLGLPPGLAK           | iTRAQ4plex (K); iTRAQ4plex (N-term)   | YES     | YES    |
| 60597         | 45.66         | 605.16                     | 742.02                     | 459.69                     | 488.57        | 1.53            | 1.65            | 0.98            | 582.0319              | 3                  | 0.0452              | GLPDAHLGLPPGLAK           | iTRAQ4plex (K); iTRAQ4plex (N-term)   | YES     | YES    |
| 60600         | 58.2          | 396.31                     | 384.75                     | 221.16                     | 237.66        | 2.06            | 1.76            | 0.97            | 582.0408              | 3                  | 0.0719              | GLPDAHLGLPPGLAK           | iTRAQ4plex (K); iTRAQ4plex (N-term)   | YES     | YES    |
| 60603         | 54.11         | 506.34                     | 582.97                     | 423.57                     | 444.36        | 1.41            | 1.43            | 0.99            | 582.0512              | 3                  | 0.1031              | GLPDAHLGLPPGLAK           | iTRAQ4plex (K); iTRAQ4plex (N-term)   | YES     | YES    |
| 60604         | 49.9          | 136.42                     | 129.00                     | 128.22                     | 107.10        | 1.57            | 1.31            | 1.25            | 582.0586              | 3                  | 0.1253              | GLPDAHLGLPPGLAK           | iTRAQ4plex (K); iTRAQ4plex (N-term)   | YES     | YES    |
| 73264         | 54.15         | 336.88                     | 356.22                     | 189.21                     | 229.13        | 1.82            | 1.69            | 0.86            | 661.3910              | 3                  | 0.0674              | AADGGERPLAASPPGTVK        | iTRAQ4plex (K); iTRAQ4plex (N-term)   | YES     | YES    |
| 73265         | 53.39         | 1924.76                    | 2161.90                    | 1402.26                    | 1470.74       | 1.62            | 1.60            | 0.99            | 661.3912              | 3                  | 0.0682              | AADGGERPLAASPPGTVK        | iTRAQ4plex (K); iTRAQ4plex (N-term)   | YES     | YES    |



|       |       |         |         |         |         |      |      |      |          |   |        |                        |                                     |     |     |
|-------|-------|---------|---------|---------|---------|------|------|------|----------|---|--------|------------------------|-------------------------------------|-----|-----|
| 73266 | 51.69 | 663.78  | 661.19  | 407.21  | 436.01  | 1.88 | 1.65 | 0.97 | 661.3913 | 3 | 0.0685 | AADGGERPLAASPPGTVK     | iTRAQ4plex (K); iTRAQ4plex (N-term) | YES | YES |
| 73268 | 48.72 | 1462.88 | 1406.04 | 858.66  | 891.95  | 2.02 | 1.71 | 1.00 | 661.3944 | 3 | 0.0777 | AADGGERPLAASPPGTVK     | iTRAQ4plex (K); iTRAQ4plex (N-term) | YES | YES |
| 73281 | 53.72 | 1259.37 | 1331.48 | 974.65  | 981.81  | 1.58 | 1.47 | 1.03 | 661.4056 | 3 | 0.1113 | AADGGERPLAASPPGTVK     | iTRAQ4plex (K); iTRAQ4plex (N-term) | YES | YES |
| 73290 | 50.98 | 1945.11 | 1894.41 | 1284.97 | 1276.28 | 1.88 | 1.61 | 1.05 | 661.4150 | 3 | 0.1395 | AADGGERPLAASPPGTVK     | iTRAQ4plex (K); iTRAQ4plex (N-term) | YES | YES |
| 90560 | 41.95 | 205.44  | 227.98  | 125.22  | 140.14  | 1.81 | 1.77 | 0.93 | 621.3325 | 4 | 0.0665 | EMLPGALHGELHPSEGPWGAPR | iTRAQ4plex (N-term)                 | YES | YES |
| 90589 | 62.31 | 334.73  | 363.31  | 223.64  | 233.57  | 1.77 | 1.69 | 1.00 | 621.4000 | 4 | 0.3364 | EMLPGALHGELHPSEGPWGAPR | iTRAQ4plex (N-term)                 | YES | YES |
| 90592 | 56.52 | 151.43  | 128.34  | 87.87   | 90.92   | 2.06 | 1.53 | 1.01 | 621.4000 | 4 | 0.3364 | EMLPGALHGELHPSEGPWGAPR | iTRAQ4plex (N-term)                 | YES | YES |
| 90874 | 42.04 | 149.80  | 160.25  | 94.38   | 83.59   | 2.21 | 2.08 | 1.18 | 625.3265 | 4 | 0.0477 | EMLPGALHGELHPSEGPWGAPR | iTRAQ4plex (N-term); Oxidation (M)  | YES | YES |
| 90878 | 51.27 | 300.14  | 342.78  | 210.32  | 197.19  | 1.88 | 1.89 | 1.11 | 625.3438 | 4 | 0.1165 | EMLPGALHGELHPSEGPWGAPR | iTRAQ4plex (N-term); Oxidation (M)  | YES | YES |
| 92044 | 43.7  | 1403.12 | 1393.81 | 591.06  | 677.01  | 2.56 | 2.24 | 0.91 | 637.7000 | 4 | 0.3496 | KLPPPGSPLGHSPTASPPPTAR | iTRAQ4plex (K); iTRAQ4plex (N-term) | YES | YES |

### Paired amphipathic helix protein Sin3b - Homo sapiens (Human)

| Accession No. | Protein Score | Normalized Ratio (114/117) | Normalized Ratio (115/117) | Normalized Ratio (116/117) | STD (114/117) | STD (115/117)   | STD (116/117)   | Mass            | Sequence Coverage (%) | Identified Peptide | Quantitated Peptide | Identified Unique Peptide |                                     |         |        |
|---------------|---------------|----------------------------|----------------------------|----------------------------|---------------|-----------------|-----------------|-----------------|-----------------------|--------------------|---------------------|---------------------------|-------------------------------------|---------|--------|
| O75182        | 87            | 1.77                       | 1.74                       | 1.13                       | 0.49          | 0.71            | 0.17            | 132983          | 3.2                   | 3                  | 3                   | 2                         |                                     |         |        |
| Spectrum No.  | Peptide Score | Int. 114                   | Int. 115                   | Int. 116                   | Int. 117      | Ratio (114/117) | Ratio (115/117) | Ratio (116/117) | Precursor m/z (Da)    | Charge             | Mass Error (Da)     | Peptide Sequence          | Modification                        | Labeled | Unique |
| 79482         | 51.11         | 61.71                      | 64.62                      | 55.88                      | 59.42         | 1.28            | 1.18            | 0.98            | 710.1065              | 3                  | 0.1158              | LPVHVEDALTYLDQVK          | iTRAQ4plex (K); iTRAQ4plex (N-term) | YES     | YES    |
| 93652         | 45.41         | 45.23                      | 38.35                      | 31.62                      | 28.54         | 1.96            | 1.46            | 1.15            | 661.5960              | 4                  | 0.1220              | SLLNEIESVYDEHQEQHSEGR     | iTRAQ4plex (N-term)                 | YES     | YES    |
| 93659         | 49.5          | 61.42                      | 79.05                      | 43.09                      | 33.98         | 2.23            | 2.53            | 1.32            | 661.6048              | 4                  | 0.1573              | SLLNEIESVYDEHQEQHSEGR     | iTRAQ4plex (N-term)                 | YES     | YES    |

### Methyl-CpG-binding domain protein 2 - Homo sapiens (Human)

| Accession No. | Protein Score | Normalized Ratio (114/117) | Normalized Ratio (115/117) | Normalized Ratio (116/117) | STD (114/117) | STD (115/117)   | STD (116/117)   | Mass            | Sequence Coverage (%) | Identified Peptide | Quantitated Peptide | Identified Unique Peptide |                                     |         |        |
|---------------|---------------|----------------------------|----------------------------|----------------------------|---------------|-----------------|-----------------|-----------------|-----------------------|--------------------|---------------------|---------------------------|-------------------------------------|---------|--------|
| Q9UBB5        | 147           | 1.64                       | 1.68                       | 1.07                       | 0.19          | 0.25            | 0.29            | 43228           | 3.2                   | 4                  | 3                   | 1                         |                                     |         |        |
| Spectrum No.  | Peptide Score | Int. 114                   | Int. 115                   | Int. 116                   | Int. 117      | Ratio (114/117) | Ratio (115/117) | Ratio (116/117) | Precursor m/z (Da)    | Charge             | Mass Error (Da)     | Peptide Sequence          | Modification                        | Labeled | Unique |
| 62631         | 73.55         | 29.99                      | 50.27                      | 31.06                      | 26.55         | 1.39            | 2.06            | 1.22            | 593.0282              | 3                  | 0.0568              | KLEEALMADILSR             | iTRAQ4plex (K); iTRAQ4plex (N-term) | YES     | YES    |
| 62637         | 59.79         | 43.05                      | 47.26                      | 39.02                      | 31.20         | 1.70            | 1.65            | 1.30            | 593.0365              | 3                  | 0.0819              | KLEEALMADILSR             | iTRAQ4plex (K); iTRAQ4plex (N-term) | YES     | YES    |
| 62640         | 58.67         | 45.89                      | 55.41                      | 28.22                      | 39.67         | 1.43            | 1.52            | 0.74            | 593.0405              | 3                  | 0.0939              | KLEEALMADILSR             | iTRAQ4plex (K); iTRAQ4plex (N-term) | YES     | YES    |
| 62641         | 68.73         | 53.93                      | 53.57                      | 40.41                      | 37.13         | 1.79            | 1.57            | 1.13            | 593.0420              | 3                  | 0.0983              | KLEEALMADILSR             | iTRAQ4plex (K); iTRAQ4plex (N-term) | YES     | YES    |

### Nuclear receptor coactivator 5 - Homo sapiens (Human)

| Accession No. | Protein Score | Normalized Ratio (114/117) | Normalized Ratio (115/117) | Normalized Ratio (116/117) | STD (114/117) | STD (115/117)   | STD (116/117)   | Mass            | Sequence Coverage (%) | Identified Peptide | Quantitated Peptide | Identified Unique Peptide |                     |         |        |
|---------------|---------------|----------------------------|----------------------------|----------------------------|---------------|-----------------|-----------------|-----------------|-----------------------|--------------------|---------------------|---------------------------|---------------------|---------|--------|
| Q9HCD5        | 45            | N/A                        | 1.64                       | N/A                        | N/A           | -               | N/A             | 65496           | 3.1                   | 1                  | 1                   | 1                         |                     |         |        |
| Spectrum No.  | Peptide Score | Int. 114                   | Int. 115                   | Int. 116                   | Int. 117      | Ratio (114/117) | Ratio (115/117) | Ratio (116/117) | Precursor m/z (Da)    | Charge             | Mass Error (Da)     | Peptide Sequence          | Modification        | Labeled | Unique |
| 75327         | 44.97         | 22.22                      | 38.89                      | 25.75                      | 25.80         | 1.06            | 1.64            | 1.04            | 677.3972              | 3                  | 0.0508              | GGHPPAIQSLINLLADNR        | iTRAQ4plex (N-term) | YES     | YES    |

## Basic transcription machinery

### Transcription termination factor 2 - Homo sapiens (Human)

| Accession No. | Protein Score | Normalized Ratio (114/117) | Normalized Ratio (115/117) | Normalized Ratio (116/117) | STD (114/117) | STD (115/117)   | STD (116/117)   | Mass            | Sequence Coverage (%) | Identified Peptide | Quantitated Peptide | Identified Unique Peptide |                                     |         |        |
|---------------|---------------|----------------------------|----------------------------|----------------------------|---------------|-----------------|-----------------|-----------------|-----------------------|--------------------|---------------------|---------------------------|-------------------------------------|---------|--------|
| Q9UNY4        | 261           | 1.30                       | 1.21                       | 0.97                       | 0.22          | 0.18            | 0.11            | 129508          | 7.7                   | 18                 | 14                  | 9                         |                                     |         |        |
| Spectrum No.  | Peptide Score | Int. 114                   | Int. 115                   | Int. 116                   | Int. 117      | Ratio (114/117) | Ratio (115/117) | Ratio (116/117) | Precursor m/z (Da)    | Charge             | Mass Error (Da)     | Peptide Sequence          | Modification                        | Labeled | Unique |
| 5624          | 40.5          | 1977.16                    | 1942.06                    | 1586.46                    | 1695.67       | 1.44            | 1.24            | 0.97            | 481.8390              | 2                  | 0.0219              | LSILTK                    | iTRAQ4plex (K); iTRAQ4plex (N-term) | YES     | NO     |
| 5626          | 40.26         | 1603.69                    | 1515.58                    | 1215.77                    | 1328.78       | 1.49            | 1.24            | 0.95            | 481.8429              | 2                  | 0.0297              | LSILTK                    | iTRAQ4plex (K); iTRAQ4plex (N-term) | YES     | NO     |
| 11462         | 45.27         | 316.14                     | 393.20                     | 357.13                     | 430.54        | 0.91            | 0.99            | 0.86            | 534.3480              | 2                  | -0.0292             | VVALHLK                   | iTRAQ4plex (K); iTRAQ4plex (N-term) | YES     | YES    |
| 28793         | 46.52         | 774.10                     | 895.20                     | 743.74                     | 814.64        | 1.17            | 1.19            | 0.95            | 647.9059              | 2                  | 0.0437              | STALTWLSK                 | iTRAQ4plex (K); iTRAQ4plex (N-term) | YES     | YES    |
| 28794         | 50.1          | 494.26                     | 537.10                     | 473.85                     | 527.14        | 1.16            | 1.11            | 0.94            | 647.9061              | 2                  | 0.0440              | STALTWLSK                 | iTRAQ4plex (K); iTRAQ4plex (N-term) | YES     | YES    |
| 34734         | 42.9          | 306.38                     | 331.06                     | 253.60                     | 256.26        | 1.48            | 1.40            | 1.03            | 456.9422              | 3                  | 0.0406              | ITSEAIQLHR                | iTRAQ4plex (N-term)                 | YES     | YES    |
| 34745         | 47.43         | 366.52                     | 373.84                     | 275.16                     | 279.24        | 1.62            | 1.46            | 1.03            | 456.9470              | 3                  | 0.0549              | ITSEAIQLHR                | iTRAQ4plex (N-term)                 | YES     | YES    |

|       |       |         |         |         |         |      |      |      |          |   |         |               |                                       |     |     |
|-------|-------|---------|---------|---------|---------|------|------|------|----------|---|---------|---------------|---------------------------------------|-----|-----|
| 34751 | 41.58 | 363.71  | 314.55  | 290.47  | 279.61  | 1.61 | 1.22 | 1.08 | 456.9576 | 3 | 0.0866  | ITSEAIQLHR    | iTRAQ4plex (N-term)                   | YES | YES |
| 40586 | 46.63 | 690.74  | 663.19  | 583.24  | 556.09  | 1.53 | 1.30 | 1.09 | 480.6375 | 3 | 0.0520  | IILDEAHNVK    | iTRAQ4plex (K); iTRAQ4plex (N-term)   | YES | YES |
| 40589 | 59.88 | 968.81  | 959.38  | 819.81  | 863.15  | 1.39 | 1.21 | 0.99 | 480.6413 | 3 | 0.0633  | IILDEAHNVK    | iTRAQ4plex (K); iTRAQ4plex (N-term)   | YES | YES |
| 40591 | 47.24 | 363.57  | 371.51  | 291.29  | 304.52  | 1.47 | 1.33 | 1.00 | 480.6431 | 3 | 0.0689  | IILDEAHNVK    | iTRAQ4plex (K); iTRAQ4plex (N-term)   | YES | YES |
| 42228 | 53.79 | 161.43  | 178.58  | 125.35  | 133.18  | 1.50 | 1.46 | 0.98 | 488.2619 | 3 | 0.0481  | MDLVEAFNHSR   | iTRAQ4plex (N-term)                   | YES | YES |
| 42234 | 40.76 | 208.88  | 255.95  | 184.47  | 194.44  | 1.33 | 1.43 | 0.99 | 488.2647 | 3 | 0.0566  | MDLVEAFNHSR   | iTRAQ4plex (N-term)                   | YES | YES |
| 50073 | 41.34 | 643.94  | 753.04  | 706.24  | 782.47  | 1.02 | 1.05 | 0.94 | 524.9812 | 3 | -0.0021 | RGTPVGSLELK   | iTRAQ4plex (K); iTRAQ4plex (N-term)   | YES | YES |
| 50078 | 41.5  | 246.65  | 217.62  | 219.08  | 255.92  | 1.19 | 0.92 | 0.89 | 524.9883 | 3 | 0.0192  | RGTQPVGSLELK  | iTRAQ4plex (K); iTRAQ4plex (N-term)   | YES | YES |
| 50875 | 41.74 | 124.97  | 151.39  | 70.73   | 113.67  | 1.36 | 1.45 | 0.65 | 793.9714 | 2 | 0.0122  | ISSLLAELEAIQR | iTRAQ4plex (N-term)                   | YES | YES |
| 50884 | 41.78 | 0.00    | 0.00    | 0.00    | 0.00    | 0.00 | 0.00 | 0.00 | 793.9979 | 2 | 0.0651  | ISSLLAELEAIQR | iTRAQ4plex (N-term)                   | YES | YES |
| 54393 | 42.14 | 1156.10 | 1245.11 | 1051.58 | 1134.43 | 1.26 | 1.19 | 0.97 | 547.3201 | 3 | 0.0443  | EKGDLFDQK     | 2 iTRAQ4plex (K); iTRAQ4plex (N-term) | YES | YES |

### TATA-box-binding protein - Homo sapiens (Human)

| Accession No. | Protein Score | Normalized Ratio (114/117) | Normalized Ratio (115/117) | Normalized Ratio (116/117) | STD (114/117) | STD (115/117)   | STD (116/117)   | Mass            | Sequence Coverage (%) | Identified Peptide | Quantitated Peptide | Identified Unique Peptide |                                                      |         |        |
|---------------|---------------|----------------------------|----------------------------|----------------------------|---------------|-----------------|-----------------|-----------------|-----------------------|--------------------|---------------------|---------------------------|------------------------------------------------------|---------|--------|
| P20226        | 490           | 0.98                       | 0.96                       | 1.05                       | 0.25          | 0.28            | 0.23            | 37674           | 19.5                  | 18                 | 6                   | 4                         |                                                      |         |        |
| Spectrum No.  | Peptide Score | Int. 114                   | Int. 115                   | Int. 116                   | Int. 117      | Ratio (114/117) | Ratio (115/117) | Ratio (116/117) | Precursor m/z (Da)    | Charge             | Mass Error (Da)     | Peptide Sequence          | Modification                                         | Labeled | Unique |
| 3678          | 41.68         | 1960.18                    | 1791.08                    | 1970.48                    | 2157.54       | 1.12            | 0.90            | 0.95            | 460.8009              | 2                  | 0.0137              | LGFFPAK                   | iTRAQ4plex (K); iTRAQ4plex (N-term)                  | YES     | YES    |
| 30206         | 70.24         | 962.06                     | 897.07                     | 1064.35                    | 1237.21       | 0.96            | 0.79            | 0.90            | 656.8865              | 2                  | -0.0058             | TTALIFSSGK                | iTRAQ4plex (K); iTRAQ4plex (N-term)                  | YES     | YES    |
| 30228         | 42.82         | 930.30                     | 935.01                     | 1160.75                    | 1275.83       | 0.90            | 0.80            | 0.95            | 656.9111              | 2                  | 0.0436              | TTALIFSSGK                | iTRAQ4plex (K); iTRAQ4plex (N-term)                  | YES     | YES    |
| 35469         | 45.41         | 0.00                       | 0.00                       | 0.00                       | 0.00          | 0.00            | 0.00            | 0.00            | 688.9872              | 2                  | 0.0552              | IVLLIFVSGK                | iTRAQ4plex (K); iTRAQ4plex (N-term)                  | YES     | YES    |
| 35470         | 61.13         | 0.00                       | 0.00                       | 0.00                       | 0.00          | 0.00            | 0.00            | 0.00            | 688.9897              | 2                  | 0.0603              | IVLLIFVSGK                | iTRAQ4plex (K); iTRAQ4plex (N-term)                  | YES     | YES    |
| 35471         | 70.61         | 0.00                       | 0.00                       | 0.00                       | 0.00          | 0.00            | 0.00            | 0.00            | 688.9898              | 2                  | 0.0604              | IVLLIFVSGK                | iTRAQ4plex (K); iTRAQ4plex (N-term)                  | YES     | YES    |
| 78323         | 69.56         | 99.87                      | 106.66                     | 110.71                     | 127.91        | 0.96            | 0.91            | 0.90            | 701.0708              | 3                  | 0.0520              | AEIYEAFENIYPILK           | iTRAQ4plex (K); iTRAQ4plex (N-term)                  | YES     | YES    |
| 78334         | 45.58         | 93.32                      | 84.18                      | 107.54                     | 89.08         | 1.29            | 1.03            | 1.26            | 701.0831              | 3                  | 0.0889              | AEIYEAFENIYPILK           | iTRAQ4plex (K); iTRAQ4plex (N-term)                  | YES     | YES    |
| 78336         | 40.27         | 0.00                       | 0.00                       | 0.00                       | 0.00          | 0.00            | 0.00            | 0.00            | 701.0869              | 3                  | 0.1001              | AEIYEAFENIYPILK           | iTRAQ4plex (K); iTRAQ4plex (N-term)                  | YES     | YES    |
| 78338         | 41.75         | 37.75                      | 62.35                      | 78.14                      | 82.42         | 0.57            | 0.82            | 0.99            | 701.0881              | 3                  | 0.1040              | AEIYEAFENIYPILK           | iTRAQ4plex (K); iTRAQ4plex (N-term)                  | YES     | YES    |
| 78340         | 58.18         | 29.44                      | 28.18                      | 35.47                      | 22.38         | 1.62            | 1.37            | 1.65            | 701.0898              | 3                  | 0.1090              | AEIYEAFENIYPILK           | iTRAQ4plex (K); iTRAQ4plex (N-term)                  | YES     | YES    |
| 78342         | 61.37         | 0.00                       | 0.00                       | 0.00                       | 0.00          | 0.00            | 0.00            | 0.00            | 701.0922              | 3                  | 0.1161              | AEIYEAFENIYPILK           | iTRAQ4plex (K); iTRAQ4plex (N-term)                  | YES     | YES    |
| 78344         | 58.22         | 44.42                      | 28.82                      | 50.31                      | 49.71         | 1.10            | 0.63            | 1.05            | 701.0990              | 3                  | 0.1366              | AEIYEAFENIYPILK           | iTRAQ4plex (K); iTRAQ4plex (N-term)                  | YES     | YES    |
| 78348         | 48.34         | 27.95                      | 52.53                      | 59.35                      | 41.28         | 0.84            | 1.38            | 1.50            | 701.1028              | 3                  | 0.1480              | AEIYEAFENIYPILK           | iTRAQ4plex (K); iTRAQ4plex (N-term)                  | YES     | YES    |
| 78393         | 63.95         | 160.62                     | 168.80                     | 184.12                     | 202.55        | 0.98            | 0.91            | 0.95            | 701.5000              | 3                  | 0.3555              | AEIYEAFENIYPILK           | Deamidated (NQ); iTRAQ4plex (K); iTRAQ4plex (N-term) | YES     | YES    |
| 98559         | 55.59         | 28.27                      | 36.38                      | 30.76                      | 28.58         | 1.22            | 1.38            | 1.12            | 770.9321              | 4                  | 0.0854              | LEGLVLTHQQFSSYEPELFPGLIYR | iTRAQ4plex (N-term)                                  | YES     | YES    |
| 98560         | 74.5          | 0.00                       | 0.00                       | 0.00                       | 0.00          | 0.00            | 0.00            | 0.00            | 770.9435              | 4                  | 0.1308              | LEGLVLTHQQFSSYEPELFPGLIYR | iTRAQ4plex (N-term)                                  | YES     | YES    |
| 98561         | 72.71         | 0.00                       | 0.00                       | 0.00                       | 0.00          | 0.00            | 0.00            | 0.00            | 770.9440              | 4                  | 0.1327              | LEGLVLTHQQFSSYEPELFPGLIYR | iTRAQ4plex (N-term)                                  | YES     | YES    |

### SWI/SNF-related proteins

#### SWI/SNF-related matrix-associated actin-dependent regulator of chromatin subfamily B member 1 - Homo sapiens (Human)

| Accession No. | Protein Score | Normalized Ratio (114/117) | Normalized Ratio (115/117) | Normalized Ratio (116/117) | STD (114/117) | STD (115/117)   | STD (116/117)   | Mass            | Sequence Coverage (%) | Identified Peptide | Quantitated Peptide | Identified Unique Peptide |                                                    |         |        |
|---------------|---------------|----------------------------|----------------------------|----------------------------|---------------|-----------------|-----------------|-----------------|-----------------------|--------------------|---------------------|---------------------------|----------------------------------------------------|---------|--------|
| Q12824        | 317           | 1.84                       | 1.77                       | 1.04                       | 0.29          | 0.26            | 0.12            | 44113           | 14.0                  | 15                 | 13                  | 5                         |                                                    |         |        |
| Spectrum No.  | Peptide Score | Int. 114                   | Int. 115                   | Int. 116                   | Int. 117      | Ratio (114/117) | Ratio (115/117) | Ratio (116/117) | Precursor m/z (Da)    | Charge             | Mass Error (Da)     | Peptide Sequence          | Modification                                       | Labeled | Unique |
| 48185         | 52.48         | 1354.70                    | 1314.90                    | 941.84                     | 920.30        | 1.82            | 1.55            | 1.07            | 772.3990              | 2                  | 0.0455              | DAFTWNNNEK                | iTRAQ4plex (K); iTRAQ4plex (N-term)                | YES     | YES    |
| 48187         | 47.74         | 1610.86                    | 1657.23                    | 1086.72                    | 1131.44       | 1.76            | 1.59            | 1.00            | 772.4020              | 2                  | 0.0514              | DAFTWNNNEK                | iTRAQ4plex (K); iTRAQ4plex (N-term)                | YES     | YES    |
| 49210         | 42.81         | 202.63                     | 218.28                     | 121.00                     | 134.34        | 1.86            | 1.77            | 0.94            | 780.4063              | 2                  | 0.0651              | DAFTWNNNEK                | iTRAQ4plex (K); iTRAQ4plex (N-term); Oxidation (M) | YES     | YES    |
| 50321         | 40.36         | 794.23                     | 838.71                     | 463.71                     | 518.29        | 1.89            | 1.76            | 0.93            | 789.4364              | 2                  | -0.0001             | AVSISTEPPTYLR             | iTRAQ4plex (N-term)                                | YES     | YES    |
| 50324         | 41.74         | 186.80                     | 209.90                     | 130.88                     | 149.90        | 1.54            | 1.52            | 0.91            | 789.4426              | 2                  | 0.0125              | AVSISTEPPTYLR             | iTRAQ4plex (N-term)                                | YES     | YES    |
| 50335         | 52.89         | 527.36                     | 581.92                     | 387.08                     | 357.00        | 1.82            | 1.77            | 1.13            | 789.4558              | 2                  | 0.0388              | AVSISTEPPTYLR             | iTRAQ4plex (N-term)                                | YES     | YES    |
| 50336         | 53.45         | 185.66                     | 216.79                     | 138.11                     | 109.57        | 2.09            | 2.15            | 1.31            | 789.4559              | 2                  | 0.0390              | AVSISTEPPTYLR             | iTRAQ4plex (N-term)                                | YES     | YES    |
| 50337         | 52.85         | 436.21                     | 489.48                     | 282.40                     | 307.80        | 1.75            | 1.73            | 0.96            | 789.4562              | 2                  | 0.0395              | AVSISTEPPTYLR             | iTRAQ4plex (N-term)                                | YES     | YES    |
| 50341         | 53.16         | 449.42                     | 529.17                     | 300.99                     | 286.93        | 1.93            | 2.00            | 1.09            | 789.4581              | 2                  | 0.0434              | AVSISTEPPTYLR             | iTRAQ4plex (N-term)                                | YES     | YES    |
| 50343         | 43.87         | 633.58                     | 670.76                     | 415.34                     | 395.64        | 1.98            | 1.84            | 1.09            | 789.4589              | 2                  | 0.0450              | AVSISTEPPTYLR             | iTRAQ4plex (N-term)                                | YES     | YES    |
| 50352         | 68.05         | 1158.55                    | 1222.28                    | 722.75                     | 687.25        | 2.08            | 1.93            | 1.10            | 789.4646              | 2                  | 0.0565              | AVSISTEPPTYLR             | iTRAQ4plex (N-term)                                | YES     | YES    |
| 50355         | 48.93         | 443.50                     | 474.99                     | 285.77                     | 268.67        | 2.04            | 1.92            | 1.11            | 789.4706              | 2                  | 0.0683              | AVSISTEPPTYLR             | iTRAQ4plex (N-term)                                | YES     | YES    |

|       |       |        |        |        |        |      |      |      |          |   |        |                  |                                       |     |     |
|-------|-------|--------|--------|--------|--------|------|------|------|----------|---|--------|------------------|---------------------------------------|-----|-----|
| 66019 | 51.54 | 173.95 | 202.45 | 169.83 | 187.16 | 1.15 | 1.18 | 0.95 | 612.6593 | 3 | 0.0522 | ASEVEEILDGNDK    | iTRAQ4plex (K); iTRAQ4plex (N-term)   | YES | YES |
| 69766 | 41.51 | 342.84 | 407.80 | 321.71 | 319.12 | 1.33 | 1.39 | 1.05 | 636.7241 | 3 | 0.0897 | DHGYTTLATSVTLK   | iTRAQ4plex (K); iTRAQ4plex (N-term)   | YES | YES |
| 84832 | 53.99 | 601.01 | 649.37 | 357.82 | 440.25 | 1.69 | 1.60 | 0.85 | 757.7719 | 3 | 0.1297 | ASEVEEILDGNDKEYK | 2 iTRAQ4plex (K); iTRAQ4plex (N-term) | YES | YES |

### SWI/SNF-related matrix-associated actin-dependent regulator of chromatin subfamily C member 2 - Homo sapiens (Human)

| Accession No. | Protein Score | Normalized Ratio (114/117) | Normalized Ratio (115/117) | Normalized Ratio (116/117) | STD (114/117) | STD (115/117)   | STD (116/117)   | Mass            | Sequence Coverage (%) | Identified Peptide | Quantitated Peptide | Identified Unique Peptide |                                                      |         |        |
|---------------|---------------|----------------------------|----------------------------|----------------------------|---------------|-----------------|-----------------|-----------------|-----------------------|--------------------|---------------------|---------------------------|------------------------------------------------------|---------|--------|
| Spectrum No.  | Peptide Score | Int. 114                   | Int. 115                   | Int. 116                   | Int. 117      | Ratio (114/117) | Ratio (115/117) | Ratio (116/117) | Precursor m/z (Da)    | Charge             | Mass Error (Da)     | Peptide Sequence          | Modification                                         | Labeled | Unique |
| Q8TAQ2        | 1430          | 1.64                       | 1.61                       | 1.06                       | 0.40          | 0.36            | 0.30            | 132797          | 19.1                  | 60                 | 30                  | 19                        |                                                      |         |        |
| 15406         | 46.41         | 70.47                      | 76.47                      | 77.32                      | 56.44         | 1.54            | 1.47            | 1.43            | 563.3058              | 2                  | 0.0105              | TPEIYLAYR                 |                                                      | NO      | NO     |
| 20502         | 48.85         | 2864.03                    | 2948.75                    | 2328.53                    | 2415.27       | 1.46            | 1.33            | 1.00            | 599.8521              | 2                  | 0.0412              | SALEEFISK                 | iTRAQ4plex (K); iTRAQ4plex (N-term)                  | YES     | YES    |
| 20504         | 62.06         | 3328.82                    | 3259.24                    | 2588.62                    | 2705.25       | 1.52            | 1.31            | 1.00            | 599.8536              | 2                  | 0.0441              | SALEEFISK                 | iTRAQ4plex (K); iTRAQ4plex (N-term)                  | YES     | YES    |
| 20506         | 51.93         | 4096.12                    | 3993.92                    | 3070.19                    | 3298.85       | 1.53            | 1.32            | 0.97            | 599.8550              | 2                  | 0.0470              | SALEEFISK                 | iTRAQ4plex (K); iTRAQ4plex (N-term)                  | YES     | YES    |
| 20508         | 52.79         | 1179.19                    | 1240.69                    | 956.90                     | 1031.70       | 1.41            | 1.31            | 0.97            | 599.8609              | 2                  | 0.0589              | SALEEFISK                 | iTRAQ4plex (K); iTRAQ4plex (N-term)                  | YES     | YES    |
| 20887         | 46.12         | 1121.26                    | 1086.83                    | 678.24                     | 666.39        | 2.08            | 1.77            | 1.06            | 602.3194              | 2                  | 0.0366              | NFMIDTYR                  | iTRAQ4plex (N-term)                                  | YES     | NO     |
| 20890         | 43.71         | 616.53                     | 623.50                     | 325.78                     | 351.72        | 2.16            | 1.93            | 0.96            | 602.3220              | 2                  | 0.0419              | NFMIDTYR                  | iTRAQ4plex (N-term)                                  | YES     | NO     |
| 20893         | 46.27         | 0.00                       | 0.00                       | 0.00                       | 0.00          | 0.00            | 0.00            | 0.00            | 602.3283              | 2                  | 0.0546              | NFMIDTYR                  | iTRAQ4plex (N-term)                                  | YES     | NO     |
| 30033         | 68.03         | 0.00                       | 0.00                       | 0.00                       | 0.00          | 0.00            | 0.00            | 0.00            | 655.8958              | 2                  | 0.0496              | ALPEFFNGK                 | iTRAQ4plex (K); iTRAQ4plex (N-term)                  | YES     | NO     |
| 30043         | 41.87         | 1214.74                    | 1313.17                    | 1037.27                    | 1044.01       | 1.44            | 1.37            | 1.03            | 655.8991              | 2                  | 0.0563              | ALPEFFNGK                 | iTRAQ4plex (K); iTRAQ4plex (N-term)                  | YES     | NO     |
| 30050         | 50.82         | 1077.14                    | 1293.22                    | 943.17                     | 931.26        | 1.43            | 1.51            | 1.05            | 655.9027              | 2                  | 0.0634              | ALPEFFNGK                 | iTRAQ4plex (K); iTRAQ4plex (N-term)                  | YES     | NO     |
| 30067         | 51.84         | 3234.50                    | 2974.87                    | 2134.90                    | 2250.96       | 1.77            | 1.44            | 0.99            | 656.1000              | 2                  | 0.4580              | ALPEFFNGK                 | iTRAQ4plex (K); iTRAQ4plex (N-term)                  | YES     | NO     |
| 30110         | 50.99         | 1153.56                    | 1072.25                    | 860.40                     | 881.21        | 1.62            | 1.32            | 1.02            | 656.3650              | 2                  | 0.0040              | ALPEFFNGK                 | Deamidated (NQ); iTRAQ4plex (K); iTRAQ4plex (N-term) | YES     | NO     |
| 30112         | 55.92         | 1348.67                    | 1516.66                    | 1281.50                    | 1321.82       | 1.26            | 1.25            | 1.01            | 656.3681              | 2                  | 0.0103              | ALPEFFNGK                 | Deamidated (NQ); iTRAQ4plex (K); iTRAQ4plex (N-term) | YES     | NO     |
| 30132         | 67.99         | 2038.43                    | 2028.42                    | 1521.47                    | 1671.51       | 1.51            | 1.32            | 0.95            | 656.3837              | 2                  | 0.0415              | ALPEFFNGK                 | Deamidated (NQ); iTRAQ4plex (K); iTRAQ4plex (N-term) | YES     | NO     |
| 30137         | 58.19         | 0.00                       | 0.00                       | 0.00                       | 0.00          | 0.00            | 0.00            | 0.00            | 656.3892              | 2                  | 0.0525              | ALPEFFNGK                 | Deamidated (NQ); iTRAQ4plex (K); iTRAQ4plex (N-term) | YES     | NO     |
| 30143         | 42.87         | 547.26                     | 687.21                     | 563.94                     | 586.94        | 1.15            | 1.27            | 1.00            | 656.3912              | 2                  | 0.0565              | ALPEFFNGK                 | Deamidated (NQ); iTRAQ4plex (K); iTRAQ4plex (N-term) | YES     | NO     |
| 30149         | 58.44         | 0.00                       | 0.00                       | 0.00                       | 0.00          | 0.00            | 0.00            | 0.00            | 656.3971              | 2                  | 0.0682              | ALPEFFNGK                 | Deamidated (NQ); iTRAQ4plex (K); iTRAQ4plex (N-term) | YES     | NO     |
| 41249         | 45.02         | 2458.53                    | 2323.33                    | 1728.18                    | 1769.91       | 1.71            | 1.43            | 1.02            | 724.9227              | 2                  | 0.0394              | YIQAEPPPTNK               | iTRAQ4plex (K); iTRAQ4plex (N-term)                  | YES     | YES    |
| 47157         | 41.57         | 357.24                     | 387.80                     | 196.90                     | 216.75        | 2.03            | 1.94            | 0.95            | 765.4187              | 2                  | 0.0355              | NVEMFMTIEK                | iTRAQ4plex (K); iTRAQ4plex (N-term)                  | YES     | YES    |
| 49516         | 63.01         | 121.79                     | 160.70                     | 68.45                      | 57.76         | 2.60            | 3.02            | 1.23            | 522.2834              | 3                  | 0.0625              | TQDECILHFLR               | iTRAQ4plex (N-term); Methylation (C)                 | YES     | NO     |
| 51335         | 56.07         | 72.22                      | 89.00                      | 88.35                      | 87.94         | 1.01            | 1.10            | 1.05            | 531.9927              | 3                  | 0.0920              | EEVPTALVEAHVR             | iTRAQ4plex (N-term)                                  | YES     | YES    |
| 53007         | 42.63         | 42.23                      | 38.26                      | 40.13                      | 41.16         | 1.27            | 1.01            | 1.02            | 540.6607              | 3                  | 0.0031              | SLVALLVETQMK              | iTRAQ4plex (K); iTRAQ4plex (N-term)                  | YES     | NO     |
| 53021         | 47.81         | 0.00                       | 0.00                       | 0.00                       | 0.00          | 0.00            | 0.00            | 0.00            | 540.6828              | 3                  | 0.0693              | SLVALLVETQMK              | iTRAQ4plex (K); iTRAQ4plex (N-term)                  | YES     | NO     |
| 53667         | 45.51         | 739.27                     | 786.73                     | 633.60                     | 646.70        | 1.41            | 1.32            | 1.02            | 543.6655              | 3                  | 0.0570              | SKTPEIYLAYR               | iTRAQ4plex (K); iTRAQ4plex (N-term)                  | YES     | NO     |
| 54128         | 41.89         | 57.76                      | 62.18                      | 45.93                      | 36.87         | 1.93            | 1.83            | 1.30            | 545.9912              | 3                  | -0.0003             | SLVALLVETQMK              | iTRAQ4plex (K); iTRAQ4plex (N-term); Oxidation (M)   | YES     | NO     |
| 59478         | 50.45         | 1017.44                    | 1178.12                    | 735.52                     | 786.72        | 1.60            | 1.63            | 0.97            | 575.3210              | 3                  | 0.0444              | EKPTDMQNFGLR              | iTRAQ4plex (K); iTRAQ4plex (N-term)                  | YES     | YES    |
| 59491         | 46.75         | 208.23                     | 238.46                     | 169.91                     | 158.12        | 1.63            | 1.64            | 1.12            | 575.3315              | 3                  | 0.0760              | EKPTDMQNFGLR              | iTRAQ4plex (K); iTRAQ4plex (N-term)                  | YES     | YES    |
| 59496         | 47.81         | 426.67                     | 466.40                     | 335.81                     | 355.42        | 1.48            | 1.43            | 0.98            | 575.3362              | 3                  | 0.0900              | EKPTDMQNFGLR              | iTRAQ4plex (K); iTRAQ4plex (N-term)                  | YES     | YES    |
| 59502         | 45.77         | 220.20                     | 240.22                     | 186.65                     | 186.36        | 1.46            | 1.40            | 1.04            | 575.3396              | 3                  | 0.1004              | EKPTDMQNFGLR              | iTRAQ4plex (K); iTRAQ4plex (N-term)                  | YES     | YES    |
| 60323         | 48.12         | 1025.58                    | 1121.04                    | 789.64                     | 763.35        | 1.66            | 1.60            | 1.08            | 580.6524              | 3                  | 0.0438              | EKPTDMQNFGLR              | iTRAQ4plex (K); iTRAQ4plex (N-term); Oxidation (M)   | YES     | YES    |
| 69777         | 45.19         | 178.14                     | 193.16                     | 105.94                     | 147.04        | 1.50            | 1.43            | 0.75            | 636.7528              | 3                  | 0.0874              | SLVALLVETQMKK             | 2 iTRAQ4plex (K); iTRAQ4plex (N-term); Oxidation (M) | YES     | NO     |
| 69779         | 46.53         | 374.79                     | 410.61                     | 298.93                     | 308.14        | 1.50            | 1.45            | 1.01            | 636.7551              | 3                  | 0.0945              | SLVALLVETQMKK             | 2 iTRAQ4plex (K); iTRAQ4plex (N-term); Oxidation (M) | YES     | NO     |
| 71212         | 52.77         | 113.04                     | 147.78                     | 82.85                      | 66.12         | 2.11            | 2.43            | 1.31            | 646.0253              | 3                  | 0.1408              | YYEAAADTVTFQDNVR          | iTRAQ4plex (N-term)                                  | YES     | YES    |
| 73911         | 52.74         | 344.58                     | 321.23                     | 241.09                     | 205.83        | 2.07            | 1.70            | 1.22            | 500.0330              | 4                  | 0.0008              | MKEEVPTALVEAHVR           | iTRAQ4plex (K); iTRAQ4plex (N-term)                  | YES     | YES    |
| 73912         | 41.81         | 498.65                     | 517.45                     | 426.09                     | 348.31        | 1.77            | 1.61            | 1.27            | 500.0349              | 4                  | 0.0087              | MKEEVPTALVEAHVR           | iTRAQ4plex (K); iTRAQ4plex (N-term)                  | YES     | YES    |
| 73946         | 42.29         | 127.28                     | 135.94                     | 114.74                     | 109.70        | 1.43            | 1.35            | 1.09            | 500.0771              | 4                  | 0.1775              | MKEEVPTALVEAHVR           | iTRAQ4plex (K); iTRAQ4plex (N-term)                  | YES     | YES    |
| 73958         | 54.89         | 123.21                     | 139.30                     | 110.56                     | 109.89        | 1.38            | 1.38            | 1.05            | 500.1000              | 4                  | 0.2690              | MKEEVPTALVEAHVR           | iTRAQ4plex (K); iTRAQ4plex (N-term)                  | YES     | YES    |
| 74568         | 48.21         | 154.00                     | 199.94                     | 193.17                     | 183.11        | 1.04            | 1.19            | 1.10            | 504.0771              | 4                  | 0.1823              | MKEEVPTALVEAHVR           | iTRAQ4plex (K); iTRAQ4plex (N-term); Oxidation (M)   | YES     | YES    |
| 81287         | 80.99         | 36.39                      | 30.31                      | 17.58                      | 16.18         | 2.78            | 2.04            | 1.13            | 725.0745              | 3                  | 0.0022              | DIGEGNLSTAAAAALAAAAVK     | iTRAQ4plex (K); iTRAQ4plex (N-term)                  | YES     | YES    |
| 81290         | 62.38         | 74.16                      | 91.76                      | 60.11                      | 65.20         | 1.40            | 1.53            | 0.96            | 725.0800              | 3                  | 0.0187              | DIGEGNLSTAAAAALAAAAVK     | iTRAQ4plex (K); iTRAQ4plex (N-term)                  | YES     | YES    |
| 81292         | 55.99         | 26.36                      | 31.75                      | 22.21                      | 23.97         | 1.36            | 1.44            | 0.97            | 725.0822              | 3                  | 0.0255              | DIGEGNLSTAAAAALAAAAVK     | iTRAQ4plex (K); iTRAQ4plex (N-term)                  | YES     | YES    |
| 81293         | 51.21         | 56.57                      | 71.30                      | 43.17                      | 67.99         | 1.03            | 1.14            | 0.66            | 725.0874              | 3                  | 0.0410              | DIGEGNLSTAAAAALAAAAVK     | iTRAQ4plex (K); iTRAQ4plex (N-term)                  | YES     | YES    |
| 81296         | 54.77         | 278.90                     | 355.10                     | 240.48                     | 226.82        | 1.52            | 1.70            | 1.10            | 725.0905              | 3                  | 0.0503              | DIGEGNLSTAAAAALAAAAVK     | iTRAQ4plex (K); iTRAQ4plex (N-term)                  | YES     | YES    |
| 81299         | 70.21         | 109.61                     | 119.73                     | 90.20                      | 96.82         | 1.40            | 1.34            | 0.97            | 725.0951              | 3                  | 0.0640              | DIGEGNLSTAAAAALAAAAVK     | iTRAQ4plex (K); iTRAQ4plex (N-term)                  | YES     | YES    |
| 81300         | 86.05         | 98.26                      | 137.00                     | 70.26                      | 96.70         | 1.25            | 1.54            | 0.76            | 725.0964              | 3                  | 0.0681              | DIGEGNLSTAAAAALAAAAVK     | iTRAQ4plex (K); iTRAQ4plex (N-term)                  | YES     | YES    |
| 81301         | 58.66         | 38.79                      | 60.28                      | 13.25                      | 32.34         | 1.48            | 2.03            | 0.43            | 725.0969              | 3                  | 0.0695              | DIGEGNLSTAAAAALAAAAVK     | iTRAQ4plex (K); iTRAQ4plex (N-term)                  | YES     | YES    |
| 81305         | 55.17         | 35.24                      | 38.21                      | 22.87                      | 22.93         | 1.90            | 1.81            | 1.04            | 725.1016              | 3                  | 0.0836              | DIGEGNLSTAAAAALAAAAVK     | iTRAQ4plex (K); iTRAQ4plex (N-term)                  | YES     | YES    |

|        |       |        |        |        |        |      |      |      |          |   |        |                             |                                                      |     |     |
|--------|-------|--------|--------|--------|--------|------|------|------|----------|---|--------|-----------------------------|------------------------------------------------------|-----|-----|
| 81308  | 54.68 | 47.93  | 53.68  | 48.11  | 44.78  | 1.32 | 1.30 | 1.12 | 725.1045 | 3 | 0.0924 | DIGEGNLSTAAAAALAAAVK        | iTRAQ4plex (K); iTRAQ4plex (N-term)                  | YES | YES |
| 81311  | 63.65 | 0.00   | 0.00   | 0.00   | 0.00   | 0.00 | 0.00 | 0.00 | 725.1102 | 3 | 0.1093 | DIGEGNLSTAAAAALAAAVK        | iTRAQ4plex (K); iTRAQ4plex (N-term)                  | YES | YES |
| 81313  | 72.09 | 112.40 | 130.24 | 68.13  | 83.80  | 1.66 | 1.69 | 0.85 | 725.1111 | 3 | 0.1121 | DIGEGNLSTAAAAALAAAVK        | iTRAQ4plex (K); iTRAQ4plex (N-term)                  | YES | YES |
| 81314  | 72.34 | 71.34  | 83.11  | 54.58  | 40.46  | 2.18 | 2.23 | 1.41 | 725.1127 | 3 | 0.1170 | DIGEGNLSTAAAAALAAAVK        | iTRAQ4plex (K); iTRAQ4plex (N-term)                  | YES | YES |
| 81315  | 62.81 | 90.93  | 103.61 | 65.10  | 72.97  | 1.54 | 1.54 | 0.93 | 725.1179 | 3 | 0.1326 | DIGEGNLSTAAAAALAAAVK        | iTRAQ4plex (K); iTRAQ4plex (N-term)                  | YES | YES |
| 81317  | 55.08 | 84.35  | 82.42  | 85.53  | 42.07  | 2.48 | 2.13 | 2.12 | 725.1250 | 3 | 0.1539 | DIGEGNLSTAAAAALAAAVK        | iTRAQ4plex (K); iTRAQ4plex (N-term)                  | YES | YES |
| 83605  | 41.07 | 463.69 | 515.36 | 364.57 | 341.08 | 1.68 | 1.64 | 1.11 | 745.4143 | 3 | 0.0892 | EGQEEVLKEVQEESEGER          | iTRAQ4plex (K); iTRAQ4plex (N-term)                  | YES | YES |
| 89375  | 60.04 | 59.04  | 48.20  | 41.78  | 60.07  | 1.21 | 0.87 | 0.72 | 813.8424 | 3 | 0.1389 | SLSSLVVQLLQFQEEVFGK         | iTRAQ4plex (K); iTRAQ4plex (N-term)                  | YES | YES |
| 99251  | 48.86 | 93.27  | 86.50  | 64.57  | 60.01  | 1.92 | 1.57 | 1.12 | 796.2000 | 4 | 0.1439 | NNASHVVPVPGNLEEEEWVRPVMK    | iTRAQ4plex (K); iTRAQ4plex (N-term)                  | YES | YES |
| 99357  | 42.11 | 179.97 | 201.32 | 131.37 | 124.89 | 1.78 | 1.75 | 1.10 | 800.2000 | 4 | 0.1490 | NNASHVVPVPGNLEEEEWVRPVMK    | iTRAQ4plex (K); iTRAQ4plex (N-term); Oxidation (M)   | YES | YES |
| 101850 | 45.89 | 84.38  | 80.80  | 72.76  | 38.64  | 2.70 | 2.27 | 1.96 | 941.4770 | 4 | 0.1755 | WILDTDTFNEWMNEEDYEVNDDKNPVS | iTRAQ4plex (K); iTRAQ4plex (N-term)                  | YES | YES |
| 101851 | 40.01 | 52.78  | 60.89  | 32.10  | 34.49  | 1.89 | 1.92 | 0.97 | 941.7174 | 4 | 0.1531 | WILDTDTFNEWMNEEDYEVNDDKNPVS | Deamidated (NQ); iTRAQ4plex (K); iTRAQ4plex (N-term) | YES | YES |

### SWI/SNF-related matrix-associated actin-dependent regulator of chromatin subfamily E member 1 - Homo sapiens (Human)

| Accession No. | Protein Score | Normalized Ratio (114/117) | Normalized Ratio (115/117) | Normalized Ratio (116/117) | STD (114/117) | STD (115/117)   | STD (116/117)   | Mass            | Sequence Coverage (%) | Identified Peptide | Quantitated Peptide | Identified Unique Peptide |                                                      |         |        |
|---------------|---------------|----------------------------|----------------------------|----------------------------|---------------|-----------------|-----------------|-----------------|-----------------------|--------------------|---------------------|---------------------------|------------------------------------------------------|---------|--------|
| Spectrum No.  | Peptide Score | Int. 114                   | Int. 115                   | Int. 116                   | Int. 117      | Ratio (114/117) | Ratio (115/117) | Ratio (116/117) | Precursor m/z (Da)    | Charge             | Mass Error (Da)     | Peptide Sequence          | Modification                                         | Labeled | Unique |
| Q969G3        | 1142          | 1.88                       | 1.76                       | 1.03                       | 0.30          | 0.28            | 0.08            | 46621           | 28.5                  | 44                 | 28                  | 10                        |                                                      |         |        |
| 16211         | 45.09         | 3594.84                    | 3457.89                    | 2577.95                    | 2680.53       | 1.66            | 1.40            | 1.00            | 569.3285              | 2                  | 0.0434              | VEVDMEK                   | iTRAQ4plex (K); iTRAQ4plex (N-term)                  | YES     | YES    |
| 24898         | 66.43         | 2341.02                    | 2299.19                    | 1569.76                    | 1595.06       | 1.81            | 1.57            | 1.03            | 624.8068              | 2                  | -0.0125             | AEAALEEEESR               | iTRAQ4plex (N-term)                                  | YES     | YES    |
| 24899         | 65.78         | 1560.43                    | 1578.42                    | 1015.46                    | 1050.73       | 1.83            | 1.63            | 1.01            | 624.8134              | 2                  | 0.0007              | AEAALEEEESR               | iTRAQ4plex (N-term)                                  | YES     | YES    |
| 24900         | 63.7          | 646.21                     | 689.55                     | 364.90                     | 379.89        | 2.10            | 1.97            | 1.00            | 624.8179              | 2                  | 0.0097              | AEAALEEEESR               | iTRAQ4plex (N-term)                                  | YES     | YES    |
| 24901         | 75.25         | 710.14                     | 792.96                     | 457.67                     | 412.61        | 2.12            | 2.09            | 1.16            | 624.8232              | 2                  | 0.0204              | AEAALEEEESR               | iTRAQ4plex (N-term)                                  | YES     | YES    |
| 24903         | 55.75         | 99.27                      | 86.66                      | 47.84                      | 52.76         | 2.32            | 1.79            | 0.94            | 624.8269              | 2                  | 0.0277              | AEAALEEEESR               | iTRAQ4plex (N-term)                                  | YES     | YES    |
| 24904         | 57.29         | 1302.52                    | 1323.82                    | 784.09                     | 804.39        | 2.00            | 1.79            | 1.02            | 624.8278              | 2                  | 0.0295              | AEAALEEEESR               | iTRAQ4plex (N-term)                                  | YES     | YES    |
| 24905         | 51.39         | 400.54                     | 423.21                     | 229.57                     | 273.25        | 1.81            | 1.68            | 0.88            | 624.8291              | 2                  | 0.0322              | AEAALEEEESR               | iTRAQ4plex (N-term)                                  | YES     | YES    |
| 24906         | 53.38         | 2176.18                    | 2191.01                    | 1373.43                    | 1388.01       | 1.94            | 1.72            | 1.03            | 624.8305              | 2                  | 0.0350              | AEAALEEEESR               | iTRAQ4plex (N-term)                                  | YES     | YES    |
| 24907         | 53.91         | 568.15                     | 592.60                     | 318.36                     | 333.08        | 2.11            | 1.93            | 1.00            | 624.8315              | 2                  | 0.0370              | AEAALEEEESR               | iTRAQ4plex (N-term)                                  | YES     | YES    |
| 24908         | 65.25         | 541.51                     | 524.39                     | 344.99                     | 313.95        | 2.13            | 1.82            | 1.14            | 624.8316              | 2                  | 0.0371              | AEAALEEEESR               | iTRAQ4plex (N-term)                                  | YES     | YES    |
| 24909         | 59.77         | 1625.00                    | 1600.00                    | 939.51                     | 941.12        | 2.13            | 1.85            | 1.04            | 624.8367              | 2                  | 0.0473              | AEAALEEEESR               | iTRAQ4plex (N-term)                                  | YES     | YES    |
| 24917         | 54.71         | 0.00                       | 0.00                       | 0.00                       | 0.00          | 0.00            | 0.00            | 0.00            | 624.8495              | 2                  | 0.0729              | AEAALEEEESR               | iTRAQ4plex (N-term)                                  | YES     | YES    |
| 29279         | 51.18         | 1061.17                    | 991.40                     | 611.34                     | 650.50        | 2.01            | 1.66            | 0.98            | 651.3635              | 2                  | 0.0548              | IEYNESMK                  | iTRAQ4plex (K); iTRAQ4plex (N-term)                  | YES     | YES    |
| 29281         | 53.05         | 2630.36                    | 2382.24                    | 1628.12                    | 1730.35       | 1.88            | 1.50            | 0.98            | 651.3657              | 2                  | 0.0592              | IEYNESMK                  | iTRAQ4plex (K); iTRAQ4plex (N-term)                  | YES     | YES    |
| 48188         | 52.4          | 149.78                     | 161.10                     | 99.10                      | 89.38         | 2.07            | 1.96            | 1.15            | 772.4037              | 2                  | -0.0194             | IAAEIAQAEQAR              | iTRAQ4plex (N-term)                                  | YES     | YES    |
| 48190         | 70.37         | 737.04                     | 748.25                     | 459.68                     | 473.57        | 1.92            | 1.72            | 1.01            | 772.4056              | 2                  | -0.0157             | IAAEIAQAEQAR              | iTRAQ4plex (N-term)                                  | YES     | YES    |
| 48194         | 40.78         | 151.63                     | 168.54                     | 81.33                      | 73.17         | 2.56            | 2.50            | 1.16            | 772.4121              | 2                  | -0.0027             | IAAEIAQAEQAR              | iTRAQ4plex (N-term)                                  | YES     | YES    |
| 48208         | 98.02         | 488.06                     | 546.92                     | 299.36                     | 300.98        | 2.00            | 1.98            | 1.04            | 772.4225              | 2                  | 0.0181              | IAAEIAQAEQAR              | iTRAQ4plex (N-term)                                  | YES     | YES    |
| 48210         | 53.72         | 1307.90                    | 1355.26                    | 857.01                     | 862.08        | 1.87            | 1.71            | 1.04            | 772.4255              | 2                  | 0.0242              | IAAEIAQAEQAR              | iTRAQ4plex (N-term)                                  | YES     | YES    |
| 48212         | 55.7          | 388.92                     | 403.90                     | 262.61                     | 274.78        | 1.75            | 1.60            | 1.00            | 772.4292              | 2                  | 0.0314              | IAAEIAQAEQAR              | iTRAQ4plex (N-term)                                  | YES     | YES    |
| 48222         | 74.04         | 901.83                     | 958.68                     | 614.53                     | 674.39        | 1.65            | 1.55            | 0.95            | 772.4389              | 2                  | 0.0509              | IAAEIAQAEQAR              | iTRAQ4plex (N-term)                                  | YES     | YES    |
| 48223         | 63.46         | 659.11                     | 694.30                     | 413.77                     | 400.69        | 2.03            | 1.88            | 1.08            | 772.4389              | 2                  | 0.0510              | IAAEIAQAEQAR              | iTRAQ4plex (N-term)                                  | YES     | YES    |
| 48236         | 84.48         | 874.73                     | 913.54                     | 574.60                     | 612.23        | 1.76            | 1.62            | 0.98            | 772.4444              | 2                  | 0.0620              | IAAEIAQAEQAR              | iTRAQ4plex (N-term)                                  | YES     | YES    |
| 48239         | 75.11         | 949.96                     | 1002.21                    | 603.66                     | 632.83        | 1.85            | 1.72            | 0.99            | 772.4466              | 2                  | 0.0663              | IAAEIAQAEQAR              | iTRAQ4plex (N-term)                                  | YES     | YES    |
| 61466         | 58.84         | 240.18                     | 340.82                     | 194.48                     | 173.91        | 1.71            | 2.13            | 1.16            | 587.0076              | 3                  | -0.0119             | KLEAELLQIEER              | iTRAQ4plex (K); iTRAQ4plex (N-term)                  | YES     | YES    |
| 61475         | 53.81         | 211.68                     | 265.85                     | 182.99                     | 167.50        | 1.56            | 1.73            | 1.14            | 587.0125              | 3                  | 0.0027              | KLEAELLQIEER              | iTRAQ4plex (K); iTRAQ4plex (N-term)                  | YES     | YES    |
| 61498         | 68.76         | 344.36                     | 382.17                     | 243.36                     | 213.67        | 1.99            | 1.94            | 1.19            | 587.0280              | 3                  | 0.0490              | KLEAELLQIEER              | iTRAQ4plex (K); iTRAQ4plex (N-term)                  | YES     | YES    |
| 61501         | 60.63         | 329.62                     | 419.03                     | 274.75                     | 278.22        | 1.46            | 1.64            | 1.03            | 587.0320              | 3                  | 0.0613              | KLEAELLQIEER              | iTRAQ4plex (K); iTRAQ4plex (N-term)                  | YES     | YES    |
| 61502         | 52.8          | 205.80                     | 210.12                     | 152.54                     | 156.93        | 1.62            | 1.46            | 1.01            | 587.0321              | 3                  | 0.0613              | KLEAELLQIEER              | iTRAQ4plex (K); iTRAQ4plex (N-term)                  | YES     | YES    |
| 61506         | 56.5          | 99.14                      | 93.12                      | 97.57                      | 100.52        | 1.22            | 1.01            | 1.01            | 587.0400              | 3                  | 0.0852              | KLEAELLQIEER              | iTRAQ4plex (K); iTRAQ4plex (N-term)                  | YES     | YES    |
| 61515         | 44.87         | 653.44                     | 728.11                     | 463.66                     | 431.41        | 1.87            | 1.83            | 1.12            | 587.2000              | 3                  | -0.4189             | KLEAELLQIEER              | Deamidated (NQ); iTRAQ4plex (K); iTRAQ4plex (N-term) | YES     | YES    |
| 63956         | 73.12         | 60.73                      | 63.36                      | 33.95                      | 34.41         | 2.18            | 2.00            | 1.03            | 600.6875              | 3                  | 0.0246              | LISEILSESVPDVR            | iTRAQ4plex (N-term)                                  | YES     | YES    |
| 63957         | 56.51         | 31.92                      | 54.23                      | 28.63                      | 31.66         | 1.24            | 1.86            | 0.94            | 600.6886              | 3                  | 0.0277              | LISEILSESVPDVR            | iTRAQ4plex (N-term)                                  | YES     | YES    |
| 63963         | 59.83         | 29.34                      | 32.91                      | 11.48                      | 15.45         | 2.34            | 2.32            | 0.77            | 600.7003              | 3                  | 0.0628              | LISEILSESVPDVR            | iTRAQ4plex (N-term)                                  | YES     | YES    |
| 63968         | 85.77         | 0.00                       | 0.00                       | 0.00                       | 0.00          | 0.00            | 0.00            | 0.00            | 900.5523              | 2                  | 0.0739              | LISEILSESVPDVR            | iTRAQ4plex (N-term)                                  | YES     | YES    |
| 63969         | 47.51         | 22.64                      | 18.13                      | 17.45                      | 12.20         | 2.29            | 1.62            | 1.49            | 600.7041              | 3                  | 0.0744              | LISEILSESVPDVR            | iTRAQ4plex (N-term)                                  | YES     | YES    |
| 63972         | 44.11         | 21.49                      | 25.39                      | 10.92                      | 15.48         | 1.71            | 1.78            | 0.73            | 600.7060              | 3                  | 0.0800              | LISEILSESVPDVR            | iTRAQ4plex (N-term)                                  | YES     | YES    |
| 63974         | 42.48         | 8.68                       | 16.19                      | 9.73                       | 8.55          | 1.25            | 2.06            | 1.19            | 600.7101              | 3                  | 0.0923              | LISEILSESVPDVR            | iTRAQ4plex (N-term)                                  | YES     | YES    |

|       |       |         |         |         |         |      |      |      |          |   |        |                     |                                       |     |     |
|-------|-------|---------|---------|---------|---------|------|------|------|----------|---|--------|---------------------|---------------------------------------|-----|-----|
| 63978 | 88.55 | 35.99   | 50.28   | 19.19   | 23.09   | 1.92 | 2.37 | 0.87 | 600.7172 | 3 | 0.1136 | LISEILSESVVPDVR     | iTRAQ4plex (N-term)                   | YES | YES |
| 73525 | 43.08 | 787.41  | 829.59  | 480.95  | 525.53  | 1.85 | 1.72 | 0.95 | 663.3749 | 3 | 0.0774 | FLESTDSFNNELKR      | iTRAQ4plex (K); iTRAQ4plex (N-term)   | YES | YES |
| 78432 | 50.74 | 648.59  | 670.30  | 465.67  | 462.37  | 1.73 | 1.58 | 1.05 | 702.0552 | 3 | 0.0225 | KFLESTDSFNNELK      | 2 iTRAQ4plex (K); iTRAQ4plex (N-term) | YES | YES |
| 90751 | 55.08 | 1372.28 | 1536.03 | 1259.33 | 1222.79 | 1.39 | 1.37 | 1.07 | 831.4703 | 3 | 0.1124 | SQSSIVPEEEQAANKGEEK | 2 iTRAQ4plex (K); iTRAQ4plex (N-term) | YES | YES |
| 94188 | 58.12 | 769.10  | 794.86  | 508.10  | 521.34  | 1.82 | 1.66 | 1.02 | 893.4783 | 3 | 0.1161 | DLTDEEKQEYLNEYAEK   | 2 iTRAQ4plex (K); iTRAQ4plex (N-term) | YES | YES |

### AT-rich interactive domain-containing protein 1A - Homo sapiens (Human)

| Accession No. | Protein Score | Normalized Ratio (114/117) | Normalized Ratio (115/117) | Normalized Ratio (116/117) | STD (114/117) | STD (115/117)   | STD (116/117)   | Mass            | Sequence Coverage (%) | Identified Peptide | Quantitated Peptide | Identified Unique Peptide |                                       |         |        |
|---------------|---------------|----------------------------|----------------------------|----------------------------|---------------|-----------------|-----------------|-----------------|-----------------------|--------------------|---------------------|---------------------------|---------------------------------------|---------|--------|
| O14497        | 367           | 1.79                       | 1.76                       | 0.96                       | 0.28          | 0.24            | 0.09            | 241892          | 3.9                   | 12                 | 10                  | 6                         |                                       |         |        |
| Spectrum No.  | Peptide Score | Int. 114                   | Int. 115                   | Int. 116                   | Int. 117      | Ratio (114/117) | Ratio (115/117) | Ratio (116/117) | Precursor m/z (Da)    | Charge             | Mass Error (Da)     | Peptide Sequence          | Modification                          | Labeled | Unique |
| 7043          | 45.9          | 0.00                       | 0.00                       | 0.00                       | 0.00          | 0.00            | 0.00            | 0.00            | 494.3566              | 2                  | 0.0255              | ALLLALAK                  | iTRAQ4plex (K); iTRAQ4plex (N-term)   | YES     | YES    |
| 19983         | 60.81         | 1900.48                    | 1825.87                    | 1256.49                    | 1311.63       | 1.79            | 1.51            | 1.00            | 595.9012              | 2                  | 0.0353              | LVLETLSK                  | iTRAQ4plex (K); iTRAQ4plex (N-term)   | YES     | YES    |
| 28283         | 43.47         | 774.99                     | 850.57                     | 571.24                     | 564.44        | 1.70            | 1.64            | 1.05            | 644.8685              | 2                  | 0.0271              | YLAFTTEK                  | iTRAQ4plex (K); iTRAQ4plex (N-term)   | YES     | YES    |
| 28297         | 54.24         | 645.73                     | 813.46                     | 398.14                     | 500.27        | 1.59            | 1.77            | 0.83            | 644.8802              | 2                  | 0.0504              | YLAFTTEK                  | iTRAQ4plex (K); iTRAQ4plex (N-term)   | YES     | YES    |
| 44068         | 40.42         | 314.29                     | 335.31                     | 261.68                     | 297.89        | 1.30            | 1.22            | 0.92            | 496.6290              | 3                  | 0.0850              | FPFGISPAQSHR              | iTRAQ4plex (N-term)                   | YES     | YES    |
| 46301         | 67.82         | 182.42                     | 179.24                     | 96.46                      | 103.48        | 2.18            | 1.88            | 0.97            | 759.3865              | 2                  | 0.0345              | EEAGGEAAAAAAAAER          | iTRAQ4plex (N-term)                   | YES     | YES    |
| 46306         | 117.5         | 747.27                     | 836.39                     | 435.89                     | 444.55        | 2.08            | 2.05            | 1.02            | 759.3911              | 2                  | 0.0438              | EEAGGEAAAAAAAAER          | iTRAQ4plex (N-term)                   | YES     | YES    |
| 46310         | 73.91         | 735.82                     | 809.16                     | 398.73                     | 462.25        | 1.97            | 1.90            | 0.90            | 759.4025              | 2                  | 0.0666              | EEAGGEAAAAAAAAER          | iTRAQ4plex (N-term)                   | YES     | YES    |
| 46312         | 75.22         | 903.58                     | 970.90                     | 574.54                     | 557.18        | 2.00            | 1.89            | 1.07            | 759.4077              | 2                  | 0.0769              | EEAGGEAAAAAAAAER          | iTRAQ4plex (N-term)                   | YES     | YES    |
| 53802         | 60.87         | 274.61                     | 319.74                     | 194.83                     | 217.91        | 1.56            | 1.59            | 0.93            | 544.3047              | 3                  | 0.0536              | VQEFDSGLLHWR              | iTRAQ4plex (N-term)                   | YES     | YES    |
| 53806         | 45.27         | 259.04                     | 297.93                     | 152.76                     | 200.83        | 1.59            | 1.61            | 0.79            | 544.3098              | 3                  | 0.0691              | VQEFDSGLLHWR              | iTRAQ4plex (N-term)                   | YES     | YES    |
| 98514         | 44.35         | 418.56                     | 471.77                     | 273.66                     | 327.21        | 1.58            | 1.57            | 0.87            | 769.6446              | 4                  | -0.0030             | KHVTTAEGTPGTTDQEGPPDPGPEK | 2 iTRAQ4plex (K); iTRAQ4plex (N-term) | YES     | YES    |

### AT-rich interactive domain-containing protein 2 - Homo sapiens (Human)

| Accession No. | Protein Score | Normalized Ratio (114/117) | Normalized Ratio (115/117) | Normalized Ratio (116/117) | STD (114/117) | STD (115/117)   | STD (116/117)   | Mass            | Sequence Coverage (%) | Identified Peptide | Quantitated Peptide | Identified Unique Peptide |                                     |         |        |
|---------------|---------------|----------------------------|----------------------------|----------------------------|---------------|-----------------|-----------------|-----------------|-----------------------|--------------------|---------------------|---------------------------|-------------------------------------|---------|--------|
| Q68CP9        | 1357          | 1.80                       | 1.67                       | 1.05                       | 0.34          | 0.30            | 0.14            | 197268          | 13.4                  | 66                 | 50                  | 21                        |                                     |         |        |
| Spectrum No.  | Peptide Score | Int. 114                   | Int. 115                   | Int. 116                   | Int. 117      | Ratio (114/117) | Ratio (115/117) | Ratio (116/117) | Precursor m/z (Da)    | Charge             | Mass Error (Da)     | Peptide Sequence          | Modification                        | Labeled | Unique |
| 12947         | 46.73         | 726.52                     | 724.22                     | 512.34                     | 541.22        | 1.66            | 1.45            | 0.99            | 544.8445              | 2                  | -0.0100             | DALLAGLK                  | iTRAQ4plex (K); iTRAQ4plex (N-term) | YES     | YES    |
| 12956         | 57.11         | 1829.76                    | 1862.02                    | 1419.50                    | 1439.26       | 1.57            | 1.41            | 1.03            | 544.8643              | 2                  | 0.0296              | DALLAGLK                  | iTRAQ4plex (K); iTRAQ4plex (N-term) | YES     | YES    |
| 12960         | 46.89         | 1564.21                    | 1739.71                    | 1353.31                    | 1403.36       | 1.38            | 1.35            | 1.00            | 544.8656              | 2                  | 0.0321              | DALLAGLK                  | iTRAQ4plex (K); iTRAQ4plex (N-term) | YES     | YES    |
| 15776         | 50.74         | 681.12                     | 643.97                     | 476.86                     | 542.90        | 1.55            | 1.29            | 0.91            | 565.8973              | 2                  | 0.0122              | LTAALILK                  | iTRAQ4plex (K); iTRAQ4plex (N-term) | YES     | YES    |
| 15778         | 56.02         | 675.05                     | 697.66                     | 498.75                     | 545.86        | 1.53            | 1.39            | 0.95            | 565.9022              | 2                  | 0.0220              | LTAALILK                  | iTRAQ4plex (K); iTRAQ4plex (N-term) | YES     | YES    |
| 15779         | 60.29         | 0.00                       | 0.00                       | 0.00                       | 0.00          | 0.00            | 0.00            | 0.00            | 565.9052              | 2                  | 0.0281              | LTAALILK                  | iTRAQ4plex (K); iTRAQ4plex (N-term) | YES     | YES    |
| 15780         | 44.56         | 460.85                     | 607.71                     | 390.45                     | 389.82        | 1.46            | 1.69            | 1.04            | 565.9078              | 2                  | 0.0333              | LTAALILK                  | iTRAQ4plex (K); iTRAQ4plex (N-term) | YES     | YES    |
| 18861         | 47.28         | 84.17                      | 91.61                      | 45.39                      | 57.87         | 1.80            | 1.72            | 0.82            | 589.3310              | 2                  | -0.0150             | GLAFLDELRL                | iTRAQ4plex (N-term)                 | YES     | YES    |
| 18862         | 45.32         | 182.13                     | 243.74                     | 112.60                     | 134.69        | 1.67            | 1.97            | 0.87            | 589.3324              | 2                  | -0.0123             | GLAFLDELRL                | iTRAQ4plex (N-term)                 | YES     | YES    |
| 18870         | 49.61         | 56.65                      | 67.67                      | 31.88                      | 30.50         | 2.29            | 2.41            | 1.09            | 589.3401              | 2                  | 0.0031              | GLAFLDELRL                | iTRAQ4plex (N-term)                 | YES     | YES    |
| 18871         | 42.02         | 114.03                     | 148.30                     | 96.73                      | 68.50         | 2.06            | 2.35            | 1.47            | 589.3421              | 2                  | 0.0072              | GLAFLDELRL                | iTRAQ4plex (N-term)                 | YES     | YES    |
| 18875         | 47.39         | 186.54                     | 222.82                     | 134.04                     | 152.75        | 1.51            | 1.59            | 0.91            | 589.3456              | 2                  | 0.0143              | GLAFLDELRL                | iTRAQ4plex (N-term)                 | YES     | YES    |
| 18877         | 54.25         | 210.53                     | 223.34                     | 136.85                     | 130.62        | 1.99            | 1.86            | 1.09            | 589.3467              | 2                  | 0.0164              | GLAFLDELRL                | iTRAQ4plex (N-term)                 | YES     | YES    |
| 18881         | 45.29         | 28.29                      | 35.35                      | 32.22                      | 18.51         | 1.89            | 2.08            | 1.81            | 589.3489              | 2                  | 0.0209              | GLAFLDELRL                | iTRAQ4plex (N-term)                 | YES     | YES    |
| 18896         | 43.06         | 0.00                       | 0.00                       | 0.00                       | 0.00          | 0.00            | 0.00            | 0.00            | 589.3585              | 2                  | 0.0401              | GLAFLDELRL                | iTRAQ4plex (N-term)                 | YES     | YES    |
| 18898         | 48.29         | 60.63                      | 68.35                      | 34.96                      | 27.36         | 2.74            | 2.72            | 1.33            | 589.3625              | 2                  | 0.0479              | GLAFLDELRL                | iTRAQ4plex (N-term)                 | YES     | YES    |
| 19213         | 63.79         | 3255.08                    | 3045.88                    | 2289.84                    | 2376.91       | 1.69            | 1.39            | 1.00            | 591.3656              | 2                  | 0.0108              | VTTLGGFAK                 | iTRAQ4plex (K); iTRAQ4plex (N-term) | YES     | YES    |
| 22223         | 40.91         | 102.67                     | 116.61                     | 75.77                      | 62.47         | 2.03            | 2.03            | 1.26            | 609.8148              | 2                  | 0.0140              | DIVDDNEVR                 | iTRAQ4plex (N-term)                 | YES     | YES    |
| 22224         | 42.1          | 106.98                     | 100.87                     | 58.89                      | 56.25         | 2.35            | 1.95            | 1.09            | 609.8164              | 2                  | 0.0174              | DIVDDNEVR                 | iTRAQ4plex (N-term)                 | YES     | YES    |
| 22225         | 41.48         | 95.01                      | 99.45                      | 62.96                      | 57.07         | 2.06            | 1.89            | 1.15            | 609.8187              | 2                  | 0.0218              | DIVDDNEVR                 | iTRAQ4plex (N-term)                 | YES     | YES    |
| 22230         | 57.18         | 387.76                     | 361.76                     | 237.49                     | 236.95        | 2.02            | 1.66            | 1.04            | 609.8221              | 2                  | 0.0287              | DIVDDNEVR                 | iTRAQ4plex (N-term)                 | YES     | YES    |
| 22231         | 57.28         | 248.71                     | 264.42                     | 158.67                     | 150.60        | 2.04            | 1.91            | 1.10            | 609.8227              | 2                  | 0.0300              | DIVDDNEVR                 | iTRAQ4plex (N-term)                 | YES     | YES    |
| 22232         | 65.11         | 301.56                     | 321.82                     | 205.92                     | 211.41        | 1.76            | 1.65            | 1.01            | 609.8232              | 2                  | 0.0309              | DIVDDNEVR                 | iTRAQ4plex (N-term)                 | YES     | YES    |
| 22236         | 52.94         | 734.52                     | 774.10                     | 566.83                     | 558.72        | 1.62            | 1.51            | 1.06            | 609.8278              | 2                  | 0.0401              | DIVDDNEVR                 | iTRAQ4plex (N-term)                 | YES     | YES    |
| 22238         | 54.64         | 642.41                     | 679.30                     | 445.86                     | 420.26        | 1.89            | 1.76            | 1.11            | 609.8290              | 2                  | 0.0425              | DIVDDNEVR                 | iTRAQ4plex (N-term)                 | YES     | YES    |
| 22241         | 61.58         | 657.76                     | 661.78                     | 498.31                     | 457.91        | 1.77            | 1.57            | 1.13            | 609.8335              | 2                  | 0.0514              | DIVDDNEVR                 | iTRAQ4plex (N-term)                 | YES     | YES    |

|       |       |         |         |         |         |      |      |      |          |   |         |                      |                                                      |     |     |
|-------|-------|---------|---------|---------|---------|------|------|------|----------|---|---------|----------------------|------------------------------------------------------|-----|-----|
| 25805 | 47.11 | 1497.36 | 1481.82 | 1092.41 | 1065.36 | 1.74 | 1.51 | 1.07 | 629.8425 | 2 | -0.0094 | LGINDIEGQR           | iTRAQ4plex (N-term)                                  | YES | YES |
| 25812 | 47.88 | 173.21  | 189.47  | 107.40  | 90.98   | 2.35 | 2.26 | 1.23 | 629.8515 | 2 | 0.0085  | LGINDIEGQR           | iTRAQ4plex (N-term)                                  | YES | YES |
| 25819 | 55.18 | 476.73  | 463.69  | 297.03  | 276.17  | 2.13 | 1.82 | 1.12 | 629.8575 | 2 | 0.0205  | LGINDIEGQR           | iTRAQ4plex (N-term)                                  | YES | YES |
| 25826 | 57.95 | 266.70  | 264.91  | 173.59  | 150.92  | 2.18 | 1.91 | 1.20 | 629.8629 | 2 | 0.0313  | LGINDIEGQR           | iTRAQ4plex (N-term)                                  | YES | YES |
| 25830 | 59.5  | 541.71  | 614.38  | 343.91  | 339.91  | 1.97 | 1.96 | 1.05 | 629.8653 | 2 | 0.0362  | LGINDIEGQR           | iTRAQ4plex (N-term)                                  | YES | YES |
| 25831 | 40.22 | 639.66  | 666.79  | 402.81  | 389.21  | 2.03 | 1.86 | 1.08 | 629.8657 | 2 | 0.0370  | LGINDIEGQR           | iTRAQ4plex (N-term)                                  | YES | YES |
| 25835 | 42.27 | 1048.78 | 1110.78 | 784.96  | 793.57  | 1.63 | 1.52 | 1.03 | 629.8698 | 2 | 0.0452  | LGINDIEGQR           | iTRAQ4plex (N-term)                                  | YES | YES |
| 31576 | 49.46 | 1310.75 | 1312.31 | 1106.73 | 1153.89 | 1.40 | 1.24 | 1.00 | 444.2858 | 3 | 0.0706  | TVFPNHTVK            | iTRAQ4plex (K); iTRAQ4plex (N-term)                  | YES | YES |
| 34052 | 42.67 | 682.64  | 667.98  | 477.19  | 425.86  | 1.98 | 1.70 | 1.17 | 454.2686 | 3 | 0.0571  | ELDLHLGLYTR          | iTRAQ4plex (N-term)                                  | YES | YES |
| 34070 | 67.92 | 3761.61 | 3719.42 | 2633.00 | 2654.80 | 1.75 | 1.52 | 1.03 | 680.9223 | 2 | 0.0335  | VAIESAVQQK           | iTRAQ4plex (K); iTRAQ4plex (N-term)                  | YES | YES |
| 34073 | 62.31 | 1751.26 | 1837.02 | 1344.00 | 1340.68 | 1.61 | 1.49 | 1.04 | 680.9282 | 2 | 0.0453  | VAIESAVQQK           | iTRAQ4plex (K); iTRAQ4plex (N-term)                  | YES | YES |
| 39442 | 76.51 | 1955.17 | 2041.73 | 1350.11 | 1416.20 | 1.70 | 1.57 | 0.99 | 712.9083 | 2 | 0.0469  | NLSFEEGNVK           | iTRAQ4plex (K); iTRAQ4plex (N-term)                  | YES | YES |
| 39446 | 61.28 | 1396.41 | 1479.42 | 972.61  | 1018.75 | 1.69 | 1.58 | 0.99 | 712.9126 | 2 | 0.0557  | NLSFEEGNVK           | iTRAQ4plex (K); iTRAQ4plex (N-term)                  | YES | YES |
| 39910 | 61.37 | 2238.27 | 2486.65 | 1586.83 | 1686.11 | 1.64 | 1.60 | 0.98 | 716.4268 | 2 | 0.0378  | GGILTSTGFYK          | iTRAQ4plex (K); iTRAQ4plex (N-term)                  | YES | YES |
| 39911 | 70.82 | 0.00    | 0.00    | 0.00    | 0.00    | 0.00 | 0.00 | 0.00 | 716.4323 | 2 | 0.0487  | GGILTSTGFYK          | iTRAQ4plex (K); iTRAQ4plex (N-term)                  | YES | YES |
| 41329 | 46.27 | 209.21  | 239.64  | 162.82  | 133.43  | 1.94 | 1.95 | 1.27 | 483.9579 | 3 | -0.0077 | KGLAFLDELRL          | iTRAQ4plex (K); iTRAQ4plex (N-term)                  | YES | YES |
| 46746 | 41.59 | 906.39  | 880.26  | 523.63  | 556.56  | 2.01 | 1.72 | 0.98 | 508.6420 | 3 | 0.0656  | FSFITHLQDK           | iTRAQ4plex (K); iTRAQ4plex (N-term)                  | YES | YES |
| 51710 | 43.69 | 391.02  | 398.90  | 291.02  | 296.51  | 1.63 | 1.46 | 1.02 | 533.9558 | 3 | 0.0500  | ENEMHVGSLLNGR        | iTRAQ4plex (N-term)                                  | YES | YES |
| 51715 | 55.19 | 422.51  | 474.33  | 345.75  | 370.97  | 1.41 | 1.39 | 0.97 | 533.9685 | 3 | 0.0881  | ENEMHVGSLLNGR        | iTRAQ4plex (N-term)                                  | YES | YES |
| 51757 | 49.62 | 320.62  | 418.90  | 297.09  | 270.21  | 1.46 | 1.69 | 1.15 | 534.2855 | 3 | 0.0550  | ENEMHVGSLLNGR        | Deamidated (NQ); iTRAQ4plex (N-term)                 | YES | YES |
| 51764 | 45.93 | 273.56  | 322.04  | 286.59  | 220.78  | 1.53 | 1.59 | 1.35 | 534.3006 | 3 | 0.1004  | ENEMHVGSLLNGR        | Deamidated (NQ); iTRAQ4plex (N-term)                 | YES | YES |
| 53316 | 46.22 | 736.58  | 721.04  | 469.98  | 404.13  | 2.25 | 1.94 | 1.21 | 541.9922 | 3 | 0.0498  | AIVNHPSAALMLR        | iTRAQ4plex (N-term); Oxidation (M)                   | YES | YES |
| 53318 | 46.22 | 591.56  | 622.19  | 386.90  | 301.97  | 2.42 | 2.24 | 1.33 | 541.9925 | 3 | 0.0509  | AIVNHPSAALMLR        | iTRAQ4plex (N-term); Oxidation (M)                   | YES | YES |
| 63136 | 56.2  | 138.16  | 141.85  | 96.08   | 117.53  | 1.45 | 1.31 | 0.85 | 595.6815 | 3 | 0.0008  | FLLLSAHSFISLR        | iTRAQ4plex (N-term)                                  | YES | YES |
| 69796 | 46.34 | 97.58   | 120.86  | 75.94   | 102.46  | 1.18 | 1.28 | 0.77 | 637.0045 | 3 | 0.0630  | NQWGEIVVEEFNPPR      | iTRAQ4plex (N-term)                                  | YES | YES |
| 69807 | 41.24 | 30.25   | 37.33   | 28.70   | 28.67   | 1.30 | 1.42 | 1.04 | 637.0231 | 3 | 0.1188  | NQWGEIVVEEFNPPR      | iTRAQ4plex (N-term)                                  | YES | YES |
| 80395 | 51.36 | 364.44  | 378.01  | 207.61  | 262.28  | 1.72 | 1.57 | 0.82 | 538.5444 | 4 | 0.0163  | VEDSSSSNGQAHIHVVGK   | iTRAQ4plex (K); iTRAQ4plex (N-term)                  | YES | YES |
| 80422 | 40.86 | 845.25  | 887.42  | 569.76  | 621.47  | 1.68 | 1.55 | 0.95 | 538.7839 | 4 | -0.0097 | VEDSSSSNGQAHIHVVGK   | Deamidated (NQ); iTRAQ4plex (K); iTRAQ4plex (N-term) | YES | YES |
| 80423 | 57.21 | 619.97  | 701.64  | 443.78  | 467.33  | 1.64 | 1.63 | 0.99 | 538.7843 | 4 | -0.0082 | VEDSSSSNGQAHIHVVGK   | Deamidated (NQ); iTRAQ4plex (K); iTRAQ4plex (N-term) | YES | YES |
| 80429 | 44.55 | 535.16  | 592.04  | 334.08  | 367.37  | 1.80 | 1.75 | 0.95 | 538.8000 | 4 | 0.0545  | VEDSSSSNGQAHIHVVGK   | Deamidated (NQ); iTRAQ4plex (K); iTRAQ4plex (N-term) | YES | YES |
| 80432 | 67.74 | 550.57  | 571.51  | 387.21  | 392.00  | 1.73 | 1.58 | 1.03 | 538.8068 | 4 | 0.0816  | VEDSSSSNGQAHIHVVGK   | Deamidated (NQ); iTRAQ4plex (K); iTRAQ4plex (N-term) | YES | YES |
| 86940 | 47.25 | 279.57  | 321.54  | 225.69  | 193.52  | 1.78 | 1.81 | 1.21 | 782.1276 | 3 | 0.0568  | AVVAQHVAPPPGIVEIDSEK | iTRAQ4plex (K); iTRAQ4plex (N-term)                  | YES | YES |
| 86944 | 61.79 | 108.66  | 116.93  | 85.95   | 82.02   | 1.64 | 1.55 | 1.09 | 782.1428 | 3 | 0.1023  | AVVAQHVAPPPGIVEIDSEK | iTRAQ4plex (K); iTRAQ4plex (N-term)                  | YES | YES |
| 86951 | 59.81 | 303.25  | 337.39  | 217.02  | 211.90  | 1.77 | 1.73 | 1.07 | 782.1557 | 3 | 0.1411  | AVVAQHVAPPPGIVEIDSEK | iTRAQ4plex (K); iTRAQ4plex (N-term)                  | YES | YES |
| 86954 | 66    | 464.46  | 526.88  | 346.29  | 331.89  | 1.73 | 1.73 | 1.09 | 782.1609 | 3 | 0.1567  | AVVAQHVAPPPGIVEIDSEK | iTRAQ4plex (K); iTRAQ4plex (N-term)                  | YES | YES |
| 86955 | 47.52 | 307.19  | 290.37  | 210.64  | 187.23  | 2.03 | 1.69 | 1.17 | 782.1619 | 3 | 0.1598  | AVVAQHVAPPPGIVEIDSEK | iTRAQ4plex (K); iTRAQ4plex (N-term)                  | YES | YES |
| 88378 | 41.95 | 28.70   | 64.93   | 44.63   | 41.93   | 0.85 | 1.68 | 1.11 | 599.7967 | 4 | 0.0110  | SHEGTSGEWIWESLFFHPPR | iTRAQ4plex (N-term)                                  | YES | YES |
| 88381 | 46.78 | 22.30   | 35.15   | 17.10   | 22.20   | 1.24 | 1.72 | 0.80 | 599.8149 | 4 | 0.0837  | SHEGTSGEWIWESLFFHPPR | iTRAQ4plex (N-term)                                  | YES | YES |
| 90491 | 48.85 | 920.23  | 888.64  | 517.04  | 558.84  | 2.03 | 1.73 | 0.96 | 620.5783 | 4 | 0.0515  | WFQTPSQVFYHAATEHGK   | iTRAQ4plex (K); iTRAQ4plex (N-term)                  | YES | YES |
| 90492 | 58.76 | 323.16  | 341.78  | 295.40  | 295.37  | 1.35 | 1.26 | 1.04 | 620.5876 | 4 | 0.0887  | WFQTPSQVFYHAATEHGK   | iTRAQ4plex (K); iTRAQ4plex (N-term)                  | YES | YES |

## Histone modifying proteins

### Histone-lysine N-methyltransferase H3 lysine-9 specific 5 - Homo sapiens (Human)

| Accession No. | Protein Score | Normalized Ratio (114/117) | Normalized Ratio (115/117) | Normalized Ratio (116/117) | STD (114/117) | STD (115/117)   | STD (116/117)   | Mass            | Sequence Coverage (%) | Identified Peptide | Quantitated Peptide | Identified Unique Peptide |                                                    |         |        |
|---------------|---------------|----------------------------|----------------------------|----------------------------|---------------|-----------------|-----------------|-----------------|-----------------------|--------------------|---------------------|---------------------------|----------------------------------------------------|---------|--------|
| Q9H9B1        | 226           | 2.05                       | 1.91                       | 0.99                       | 0.43          | 0.42            | 0.38            | 138166          | 5.9                   | 12                 | 7                   | 6                         |                                                    |         |        |
| Spectrum No.  | Peptide Score | Int. 114                   | Int. 115                   | Int. 116                   | Int. 117      | Ratio (114/117) | Ratio (115/117) | Ratio (116/117) | Precursor m/z (Da)    | Charge             | Mass Error (Da)     | Peptide Sequence          | Modification                                       | Labeled | Unique |
| 18446         | 42.28         | 1103.10                    | 1144.80                    | 905.72                     | 949.10        | 1.43            | 1.31            | 0.99            | 586.3519              | 2                  | 0.0329              | TVIEMFK                   | iTRAQ4plex (K); iTRAQ4plex (N-term); Oxidation (M) | YES     | YES    |
| 39700         | 41.91         | 1862.31                    | 1784.29                    | 1249.72                    | 1340.98       | 1.71            | 1.45            | 0.97            | 476.6479              | 3                  | 0.0345              | KLPAPGADVK                | 2 iTRAQ4plex (K); iTRAQ4plex (N-term)              | YES     | YES    |
| 42032         | 41.66         | 370.02                     | 398.93                     | 168.32                     | 190.03        | 2.40            | 2.28            | 0.92            | 730.4008              | 2                  | 0.0322              | VNPQDGTNTLTR              | iTRAQ4plex (N-term)                                | YES     | YES    |
| 42037         | 56.04         | 2278.67                    | 2316.63                    | 1286.76                    | 1323.78       | 2.13            | 1.90            | 1.01            | 730.4123              | 2                  | 0.0551              | VNPQDGTNTLTR              | iTRAQ4plex (N-term)                                | YES     | YES    |
| 42047         | 47.92         | 819.31                     | 784.71                     | 384.06                     | 433.93        | 2.33            | 1.97            | 0.92            | 730.4259              | 2                  | 0.0823              | VNPQDGTNTLTR              | iTRAQ4plex (N-term)                                | YES     | YES    |
| 67346         | 41.25         | 29.54                      | 23.00                      | 7.99                       | 16.62         | 2.19            | 1.50            | 0.50            | 621.3694              | 3                  | 0.0238              | VLLMLVDGIDPNFK            | iTRAQ4plex (K); iTRAQ4plex (N-term)                | YES     | YES    |
| 67354         | 72.57         | 47.84                      | 57.87                      | 42.78                      | 22.02         | 2.68            | 2.86            | 2.02            | 621.3755              | 3                  | 0.0421              | VLLMLVDGIDPNFK            | iTRAQ4plex (K); iTRAQ4plex (N-term)                | YES     | YES    |
| 67358         | 40.66         | 0.00                       | 0.00                       | 0.00                       | 0.00          | 0.00            | 0.00            | 0.00            | 621.3813              | 3                  | 0.0595              | VLLMLVDGIDPNFK            | iTRAQ4plex (K); iTRAQ4plex (N-term)                | YES     | YES    |
| 77073         | 40.78         | 277.12                     | 294.17                     | 176.10                     | 196.78        | 1.74            | 1.62            | 0.93            | 691.0629              | 3                  | 0.1008              | TPLMEEAENHLEAVK           | iTRAQ4plex (K); iTRAQ4plex (N-term); Oxidation (M) | YES     | YES    |

|       |       |        |        |        |        |      |      |      |          |   |        |                  |                                       |     |     |
|-------|-------|--------|--------|--------|--------|------|------|------|----------|---|--------|------------------|---------------------------------------|-----|-----|
| 81434 | 54.51 | 538.76 | 611.80 | 368.43 | 355.81 | 1.87 | 1.87 | 1.08 | 726.1070 | 3 | 0.0629 | ETLESALIALDSEKPK | 2 iTRAQ4plex (K); iTRAQ4plex (N-term) | YES | YES |
| 81437 | 57.15 | 357.21 | 489.50 | 270.70 | 304.33 | 1.45 | 1.75 | 0.93 | 726.1193 | 3 | 0.0998 | ETLESALIALDSEKPK | 2 iTRAQ4plex (K); iTRAQ4plex (N-term) | YES | YES |
| 81443 | 44.08 | 476.02 | 448.87 | 259.32 | 264.88 | 2.22 | 1.84 | 1.02 | 726.1378 | 3 | 0.1553 | ETLESALIALDSEKPK | 2 iTRAQ4plex (K); iTRAQ4plex (N-term) | YES | YES |

### Histone-lysine N-methyltransferase H3 lysine-9 specific 3 - Homo sapiens (Human)

| Accession No. | Protein Score | Normalized Ratio (114/117) | Normalized Ratio (115/117) | Normalized Ratio (116/117) | STD (114/117) | STD (115/117)   | STD (116/117)   | Mass            | Sequence Coverage (%) | Identified Peptide | Quantitated Peptide | Identified Unique Peptide |                                     |         |        |
|---------------|---------------|----------------------------|----------------------------|----------------------------|---------------|-----------------|-----------------|-----------------|-----------------------|--------------------|---------------------|---------------------------|-------------------------------------|---------|--------|
| Q96KQ7        | 922           | 2.02                       | 1.83                       | 1.01                       | 0.32          | 0.31            | 0.11            | 132287          | 5.3                   | 29                 | 23                  | 5                         |                                     |         |        |
| Spectrum No.  | Peptide Score | Int. 114                   | Int. 115                   | Int. 116                   | Int. 117      | Ratio (114/117) | Ratio (115/117) | Ratio (116/117) | Precursor m/z (Da)    | Charge             | Mass Error (Da)     | Peptide Sequence          | Modification                        | Labeled | Unique |
| 19728         | 43.46         | 1978.80                    | 1909.85                    | 1400.49                    | 1390.07       | 1.76            | 1.49            | 1.05            | 594.8324              | 2                  | -0.0129             | ALVIQESER                 | iTRAQ4plex (N-term)                 | YES     | YES    |
| 19730         | 43.01         | 2539.57                    | 2471.38                    | 1894.35                    | 1954.28       | 1.60            | 1.37            | 1.01            | 594.8343              | 2                  | -0.0090             | ALVIQESER                 | iTRAQ4plex (N-term)                 | YES     | YES    |
| 19734         | 44.6          | 1111.39                    | 1130.40                    | 678.22                     | 681.35        | 2.01            | 1.80            | 1.04            | 594.8386              | 2                  | -0.0005             | ALVIQESER                 | iTRAQ4plex (N-term)                 | YES     | YES    |
| 19746         | 45.29         | 995.94                     | 1003.17                    | 615.62                     | 605.29        | 2.03            | 1.80            | 1.06            | 594.8516              | 2                  | 0.0255              | ALVIQESER                 | iTRAQ4plex (N-term)                 | YES     | YES    |
| 19748         | 46.46         | 1956.05                    | 1947.34                    | 1299.77                    | 1256.56       | 1.92            | 1.68            | 1.08            | 594.8539              | 2                  | 0.0300              | ALVIQESER                 | iTRAQ4plex (N-term)                 | YES     | YES    |
| 19750         | 46.58         | 2677.66                    | 2566.94                    | 1650.49                    | 1560.16       | 2.12            | 1.79            | 1.10            | 594.8580              | 2                  | 0.0383              | ALVIQESER                 | iTRAQ4plex (N-term)                 | YES     | YES    |
| 30680         | 43.3          | 557.61                     | 619.41                     | 376.70                     | 387.43        | 1.78            | 1.74            | 1.01            | 440.2530              | 3                  | 0.0387              | VFMLHQDLR                 | iTRAQ4plex (N-term); Oxidation (M)  | YES     | YES    |
| 30686         | 61.62         | 887.26                     | 937.15                     | 597.42                     | 583.18        | 1.88            | 1.75            | 1.07            | 440.2580              | 3                  | 0.0536              | VFMLHQDLR                 | iTRAQ4plex (N-term); Oxidation (M)  | YES     | YES    |
| 30689         | 49.41         | 414.96                     | 452.14                     | 270.72                     | 253.37        | 2.02            | 1.94            | 1.11            | 440.2617              | 3                  | 0.0648              | VFMLHQDLR                 | iTRAQ4plex (N-term); Oxidation (M)  | YES     | YES    |
| 51137         | 110.34        | 1647.96                    | 1651.85                    | 897.68                     | 987.95        | 2.06            | 1.82            | 0.95            | 795.9161              | 2                  | 0.0047              | LNSGGGLSEELGSAR           | iTRAQ4plex (N-term)                 | YES     | YES    |
| 51147         | 60.79         | 861.32                     | 883.93                     | 427.42                     | 433.88        | 2.45            | 2.21            | 1.03            | 795.9330              | 2                  | 0.0383              | LNSGGGLSEELGSAR           | iTRAQ4plex (N-term)                 | YES     | YES    |
| 51150         | 129.43        | 937.08                     | 996.09                     | 437.41                     | 498.32        | 2.32            | 2.17            | 0.91            | 795.9406              | 2                  | 0.0536              | LNSGGGLSEELGSAR           | iTRAQ4plex (N-term)                 | YES     | YES    |
| 51152         | 67.96         | 763.99                     | 800.40                     | 371.39                     | 381.49        | 2.47            | 2.28            | 1.01            | 795.9407              | 2                  | 0.0539              | LNSGGGLSEELGSAR           | iTRAQ4plex (N-term)                 | YES     | YES    |
| 51153         | 54.53         | 393.18                     | 441.22                     | 178.72                     | 219.52        | 2.21            | 2.18            | 0.85            | 795.9410              | 2                  | 0.0544              | LNSGGGLSEELGSAR           | iTRAQ4plex (N-term)                 | YES     | YES    |
| 51162         | 125.11        | 1198.83                    | 1158.45                    | 604.86                     | 671.62        | 2.20            | 1.87            | 0.94            | 795.9534              | 2                  | 0.0791              | LNSGGGLSEELGSAR           | iTRAQ4plex (N-term)                 | YES     | YES    |
| 66254         | 60.52         | 0.00                       | 0.00                       | 0.00                       | 0.00          | 0.00            | 0.00            | 0.00            | 614.3450              | 3                  | 0.0523              | FINHLCDPNIIPVR            | iTRAQ4plex (N-term); Methylthio (C) | YES     | YES    |
| 67381         | 49.6          | 579.79                     | 610.64                     | 327.66                     | 324.64        | 2.20            | 2.04            | 1.05            | 621.6753              | 3                  | -0.0061             | KLNSGGGLSEELGSAR          | iTRAQ4plex (K); iTRAQ4plex (N-term) | YES     | YES    |
| 67393         | 61.71         | 929.59                     | 970.59                     | 564.60                     | 629.62        | 1.82            | 1.68            | 0.93            | 621.6909              | 3                  | 0.0408              | KLNSGGGLSEELGSAR          | iTRAQ4plex (K); iTRAQ4plex (N-term) | YES     | YES    |
| 67397         | 67.74         | 1086.45                    | 1027.69                    | 650.37                     | 697.71        | 1.92            | 1.60            | 0.97            | 621.6936              | 3                  | 0.0490              | KLNSGGGLSEELGSAR          | iTRAQ4plex (K); iTRAQ4plex (N-term) | YES     | YES    |
| 67410         | 44.85         | 299.86                     | 307.06                     | 168.76                     | 186.10        | 1.99            | 1.79            | 0.94            | 621.7025              | 3                  | 0.0757              | KLNSGGGLSEELGSAR          | iTRAQ4plex (K); iTRAQ4plex (N-term) | YES     | YES    |
| 67413         | 75            | 388.86                     | 357.10                     | 321.14                     | 327.19        | 1.47            | 1.19            | 1.02            | 621.7037              | 3                  | 0.0792              | KLNSGGGLSEELGSAR          | iTRAQ4plex (K); iTRAQ4plex (N-term) | YES     | YES    |
| 67416         | 75.95         | 268.10                     | 245.18                     | 161.35                     | 159.49        | 2.08            | 1.67            | 1.05            | 621.7091              | 3                  | 0.0953              | KLNSGGGLSEELGSAR          | iTRAQ4plex (K); iTRAQ4plex (N-term) | YES     | YES    |
| 71284         | 48.12         | 165.78                     | 160.92                     | 106.09                     | 114.06        | 1.79            | 1.53            | 0.97            | 646.3712              | 3                  | 0.0596              | TPLMEAVVNNHLEVAR          | iTRAQ4plex (N-term)                 | YES     | YES    |
| 71290         | 41.26         | 48.90                      | 55.17                      | 29.87                      | 48.60         | 1.24            | 1.23            | 0.64            | 646.3748              | 3                  | 0.0705              | TPLMEAVVNNHLEVAR          | iTRAQ4plex (N-term)                 | YES     | YES    |
| 72081         | 53.91         | 305.21                     | 339.36                     | 278.94                     | 261.11        | 1.44            | 1.41            | 1.11            | 651.7102              | 3                  | 0.0817              | TPLMEAVVNNHLEVAR          | iTRAQ4plex (N-term); Oxidation (M)  | YES     | YES    |
| 72084         | 76.14         | 392.24                     | 388.03                     | 253.56                     | 223.20        | 2.17            | 1.89            | 1.18            | 651.7111              | 3                  | 0.0844              | TPLMEAVVNNHLEVAR          | iTRAQ4plex (N-term); Oxidation (M)  | YES     | YES    |
| 72086         | 47.71         | 285.51                     | 274.28                     | 254.70                     | 234.26        | 1.50            | 1.27            | 1.13            | 651.7131              | 3                  | 0.0903              | TPLMEAVVNNHLEVAR          | iTRAQ4plex (N-term); Oxidation (M)  | YES     | YES    |
| 72089         | 50.24         | 223.35                     | 232.71                     | 165.03                     | 162.34        | 1.70            | 1.56            | 1.06            | 651.7164              | 3                  | 0.1003              | TPLMEAVVNNHLEVAR          | iTRAQ4plex (N-term); Oxidation (M)  | YES     | YES    |
| 72095         | 89.17         | 90.72                      | 113.82                     | 58.88                      | 64.24         | 1.74            | 1.93            | 0.95            | 651.7256              | 3                  | 0.1278              | TPLMEAVVNNHLEVAR          | iTRAQ4plex (N-term); Oxidation (M)  | YES     | YES    |

### Histone deacetylase complex subunit SAP130 - Homo sapiens (Human)

| Accession No. | Protein Score | Normalized Ratio (114/117) | Normalized Ratio (115/117) | Normalized Ratio (116/117) | STD (114/117) | STD (115/117)   | STD (116/117)   | Mass            | Sequence Coverage (%) | Identified Peptide | Quantitated Peptide | Identified Unique Peptide |                                     |         |        |
|---------------|---------------|----------------------------|----------------------------|----------------------------|---------------|-----------------|-----------------|-----------------|-----------------------|--------------------|---------------------|---------------------------|-------------------------------------|---------|--------|
| Q9H0E3        | 79            | 1.37                       | 1.22                       | 0.97                       | 0.05          | 0.12            | 0.15            | 110255          | 2.3                   | 2                  | 2                   | 2                         |                                     |         |        |
| Spectrum No.  | Peptide Score | Int. 114                   | Int. 115                   | Int. 116                   | Int. 117      | Ratio (114/117) | Ratio (115/117) | Ratio (116/117) | Precursor m/z (Da)    | Charge             | Mass Error (Da)     | Peptide Sequence          | Modification                        | Labeled | Unique |
| 46050         | 54.68         | 766.10                     | 745.11                     | 599.69                     | 701.27        | 1.35            | 1.15            | 0.89            | 757.4826              | 2                  | 0.0387              | LTNLQEGIIIPK              | iTRAQ4plex (K); iTRAQ4plex (N-term) | YES     | YES    |
| 53019         | 57.8          | 454.38                     | 481.25                     | 418.27                     | 396.70        | 1.41            | 1.32            | 1.10            | 540.6781              | 3                  | 0.0473              | ITLPSHPALGTPK             | iTRAQ4plex (K); iTRAQ4plex (N-term) | YES     | YES    |

### Histone deacetylase 1 - Homo sapiens (Human)

| Accession No. | Protein Score | Normalized Ratio (114/117) | Normalized Ratio (115/117) | Normalized Ratio (116/117) | STD (114/117) | STD (115/117)   | STD (116/117)   | Mass            | Sequence Coverage (%) | Identified Peptide | Quantitated Peptide | Identified Unique Peptide |                                     |         |        |
|---------------|---------------|----------------------------|----------------------------|----------------------------|---------------|-----------------|-----------------|-----------------|-----------------------|--------------------|---------------------|---------------------------|-------------------------------------|---------|--------|
| Q13547        | 808           | 1.71                       | 1.47                       | 1.01                       | 0.55          | 0.28            | 0.10            | 55068           | 19.7                  | 32                 | 15                  | 7                         |                                     |         |        |
| Spectrum No.  | Peptide Score | Int. 114                   | Int. 115                   | Int. 116                   | Int. 117      | Ratio (114/117) | Ratio (115/117) | Ratio (116/117) | Precursor m/z (Da)    | Charge             | Mass Error (Da)     | Peptide Sequence          | Modification                        | Labeled | Unique |
| 23810         | 60.07         | 1893.41                    | 1829.58                    | 888.51                     | 1056.19       | 2.21            | 1.88            | 0.88            | 412.9107              | 3                  | 0.0161              | VMTVSFHK                  | iTRAQ4plex (K); iTRAQ4plex (N-term) | YES     | NO     |

|       |       |         |         |         |         |      |      |      |          |   |         |                     |                                                      |     |     |
|-------|-------|---------|---------|---------|---------|------|------|------|----------|---|---------|---------------------|------------------------------------------------------|-----|-----|
| 23821 | 42.33 | 1664.80 | 1659.96 | 729.93  | 919.49  | 2.24 | 1.96 | 0.83 | 412.9133 | 3 | 0.0241  | VMTVSFHK            | iTRAQ4plex (K); iTRAQ4plex (N-term)                  | YES | NO  |
| 29336 | 42.28 | 2221.77 | 2261.71 | 1522.13 | 1544.24 | 1.78 | 1.59 | 1.03 | 651.8543 | 2 | 0.0051  | YYAVNYPLR           | iTRAQ4plex (N-term)                                  | YES | YES |
| 29364 | 41.6  | 0.00    | 0.00    | 0.00    | 0.00    | 0.00 | 0.00 | 0.00 | 651.8772 | 2 | 0.0508  | YYAVNYPLR           | iTRAQ4plex (N-term)                                  | YES | YES |
| 29365 | 40.79 | 711.81  | 709.69  | 463.30  | 413.44  | 2.13 | 1.87 | 1.17 | 651.8790 | 2 | 0.0545  | YYAVNYPLR           | iTRAQ4plex (N-term)                                  | YES | YES |
| 46364 | 45.4  | 1311.97 | 1351.49 | 872.32  | 934.39  | 1.73 | 1.57 | 0.97 | 759.8677 | 2 | -0.0063 | YGEYFPGTGDLR        | iTRAQ4plex (N-term)                                  | YES | NO  |
| 46367 | 56.83 | 916.58  | 920.94  | 612.97  | 590.50  | 1.92 | 1.70 | 1.08 | 759.8807 | 2 | 0.0197  | YGEYFPGTGDLR        | iTRAQ4plex (N-term)                                  | YES | NO  |
| 46368 | 55.88 | 1311.75 | 1362.77 | 866.52  | 838.64  | 1.93 | 1.77 | 1.08 | 759.8817 | 2 | 0.0216  | YGEYFPGTGDLR        | iTRAQ4plex (N-term)                                  | YES | NO  |
| 46371 | 48.69 | 570.05  | 647.44  | 416.54  | 426.61  | 1.65 | 1.65 | 1.02 | 759.8885 | 2 | 0.0351  | YGEYFPGTGDLR        | iTRAQ4plex (N-term)                                  | YES | NO  |
| 46373 | 59.54 | 989.03  | 948.56  | 647.71  | 654.90  | 1.86 | 1.57 | 1.03 | 759.8930 | 2 | 0.0441  | YGEYFPGTGDLR        | iTRAQ4plex (N-term)                                  | YES | NO  |
| 46375 | 53.58 | 1207.18 | 1190.99 | 767.16  | 768.29  | 1.94 | 1.68 | 1.04 | 759.9009 | 2 | 0.0600  | YGEYFPGTGDLR        | iTRAQ4plex (N-term)                                  | YES | NO  |
| 46377 | 55.63 | 1207.64 | 1167.85 | 769.26  | 823.22  | 1.81 | 1.54 | 0.97 | 759.9061 | 2 | 0.0704  | YGEYFPGTGDLR        | iTRAQ4plex (N-term)                                  | YES | NO  |
| 46378 | 55.26 | 0.00    | 0.00    | 0.00    | 0.00    | 0.00 | 0.00 | 0.00 | 759.9069 | 2 | 0.0721  | YGEYFPGTGDLR        | iTRAQ4plex (N-term)                                  | YES | NO  |
| 46411 | 50.96 | 3136.77 | 3111.50 | 1979.05 | 2060.83 | 1.88 | 1.64 | 1.00 | 760.1040 | 2 | 0.4661  | YGEYFPGTGDLR        | iTRAQ4plex (N-term)                                  | YES | NO  |
| 59031 | 47.86 | 1784.40 | 1830.24 | 1335.78 | 1404.06 | 1.57 | 1.42 | 0.99 | 572.3112 | 3 | 0.0518  | SIRPDNMSEYSK        | iTRAQ4plex (K); iTRAQ4plex (N-term)                  | YES | NO  |
| 59032 | 50.18 | 740.84  | 758.02  | 589.64  | 585.71  | 1.56 | 1.41 | 1.05 | 572.3141 | 3 | 0.0605  | SIRPDNMSEYSK        | iTRAQ4plex (K); iTRAQ4plex (N-term)                  | YES | NO  |
| 59829 | 41.14 | 1265.58 | 1271.14 | 1037.56 | 1068.04 | 1.46 | 1.29 | 1.01 | 577.6239 | 3 | -0.0050 | SIRPDNMSEYSK        | iTRAQ4plex (K); iTRAQ4plex (N-term); Oxidation (M)   | YES | NO  |
| 59845 | 49.53 | 1955.22 | 1938.92 | 1601.91 | 1664.98 | 1.45 | 1.27 | 1.00 | 577.6585 | 3 | 0.0988  | SIRPDNMSEYSK        | iTRAQ4plex (K); iTRAQ4plex (N-term); Oxidation (M)   | YES | NO  |
| 73647 | 45.26 | 173.83  | 208.69  | 130.85  | 127.90  | 1.68 | 1.77 | 1.07 | 664.3516 | 3 | 0.0186  | QQTDIAVNWAGLHHAHAK  | Deamidated (NQ); iTRAQ4plex (K)                      | YES | YES |
| 73652 | 41.97 | 307.08  | 346.23  | 246.37  | 265.57  | 1.43 | 1.42 | 0.97 | 664.3577 | 3 | 0.0371  | QQTDIAVNWAGLHHAHAK  | Deamidated (NQ); iTRAQ4plex (K)                      | YES | YES |
| 79792 | 42.95 | 122.46  | 126.98  | 121.75  | 147.39  | 1.03 | 0.94 | 0.86 | 534.3274 | 4 | 0.1483  | QQTDIAVNWAGLHHAHAK  | iTRAQ4plex (K); iTRAQ4plex (N-term)                  | YES | YES |
| 79796 | 55.55 | 203.12  | 244.19  | 250.62  | 307.48  | 0.82 | 0.86 | 0.85 | 534.3369 | 4 | 0.1861  | QQTDIAVNWAGLHHAHAK  | iTRAQ4plex (K); iTRAQ4plex (N-term)                  | YES | YES |
| 90401 | 40.07 | 252.96  | 302.15  | 256.45  | 228.16  | 1.37 | 1.44 | 1.17 | 826.1154 | 3 | 0.0674  | DGIDDESIEAIFKPVMSK  | 2 iTRAQ4plex (K); iTRAQ4plex (N-term)                | YES | YES |
| 90403 | 65.44 | 1012.47 | 976.52  | 731.89  | 785.09  | 1.59 | 1.35 | 0.97 | 826.1213 | 3 | 0.0852  | DGIDDESIEAIFKPVMSK  | 2 iTRAQ4plex (K); iTRAQ4plex (N-term)                | YES | YES |
| 90404 | 48.49 | 357.21  | 339.41  | 242.49  | 244.75  | 1.80 | 1.51 | 1.03 | 826.1219 | 3 | 0.0870  | DGIDDESIEAIFKPVMSK  | 2 iTRAQ4plex (K); iTRAQ4plex (N-term)                | YES | YES |
| 90409 | 51.72 | 558.76  | 561.78  | 393.67  | 443.72  | 1.55 | 1.38 | 0.92 | 826.1280 | 3 | 0.1054  | DGIDDESIEAIFKPVMSK  | 2 iTRAQ4plex (K); iTRAQ4plex (N-term)                | YES | YES |
| 90418 | 76.46 | 777.09  | 995.73  | 690.05  | 715.95  | 1.34 | 1.51 | 1.00 | 826.1443 | 3 | 0.1541  | DGIDDESIEAIFKPVMSK  | 2 iTRAQ4plex (K); iTRAQ4plex (N-term)                | YES | YES |
| 90740 | 50.67 | 688.15  | 792.69  | 636.49  | 618.57  | 1.37 | 1.39 | 1.07 | 831.4426 | 3 | 0.0541  | DGIDDESIEAIFKPVMSK  | 2 iTRAQ4plex (K); iTRAQ4plex (N-term); Oxidation (M) | YES | YES |
| 90743 | 58.96 | 717.43  | 728.36  | 558.49  | 557.14  | 1.59 | 1.42 | 1.04 | 831.4493 | 3 | 0.0743  | DGIDDESIEAIFKPVMSK  | 2 iTRAQ4plex (K); iTRAQ4plex (N-term); Oxidation (M) | YES | YES |
| 90745 | 72.29 | 476.14  | 443.02  | 351.09  | 353.76  | 1.66 | 1.36 | 1.03 | 831.4525 | 3 | 0.0839  | DGIDDESIEAIFKPVMSK  | 2 iTRAQ4plex (K); iTRAQ4plex (N-term); Oxidation (M) | YES | YES |
| 91525 | 75.63 | 659.89  | 455.57  | 273.96  | 280.22  | 2.91 | 1.77 | 1.02 | 841.1147 | 3 | 0.0701  | LHISPSNMTNQNTNEYLEK | iTRAQ4plex (K); iTRAQ4plex (N-term)                  | YES | YES |
| 91528 | 47.65 | 619.55  | 472.27  | 229.67  | 291.19  | 2.63 | 1.76 | 0.82 | 841.1339 | 3 | 0.1278  | LHISPSNMTNQNTNEYLEK | iTRAQ4plex (K); iTRAQ4plex (N-term)                  | YES | YES |

## Histone deacetylase 2 - Homo sapiens (Human)

| Accession No. | Protein Score | Normalized Ratio (114/117) | Normalized Ratio (115/117) | Normalized Ratio (116/117) | STD (114/117) | STD (115/117)   | STD (116/117)   | Mass            | Sequence Coverage (%) | Identified Peptide | Quantitated Peptide | Identified Unique Peptide |  |                                                    |         |        |
|---------------|---------------|----------------------------|----------------------------|----------------------------|---------------|-----------------|-----------------|-----------------|-----------------------|--------------------|---------------------|---------------------------|--|----------------------------------------------------|---------|--------|
| Q92769        | 631           | 1.29                       | 1.28                       | 0.94                       | 0.21          | 0.20            | 0.04            | 55329           | 13.7                  | 24                 | 8                   | 5                         |  |                                                    |         |        |
| Spectrum No.  | Peptide Score | Int. 114                   | Int. 115                   | Int. 116                   | Int. 117      | Ratio (114/117) | Ratio (115/117) | Ratio (116/117) | Precursor m/z (Da)    | Charge             | Mass Error (Da)     | Peptide Sequence          |  | Modification                                       | Labeled | Unique |
| 23810         | 60.07         | 1893.41                    | 1829.58                    | 888.51                     | 1056.19       | 2.21            | 1.88            | 0.88            | 412.9107              | 3                  | 0.0161              | VMTVSFHK                  |  | iTRAQ4plex (K); iTRAQ4plex (N-term)                | YES     | NO     |
| 23821         | 42.33         | 1664.80                    | 1659.96                    | 729.93                     | 919.49        | 2.24            | 1.96            | 0.83            | 412.9133              | 3                  | 0.0241              | VMTVSFHK                  |  | iTRAQ4plex (K); iTRAQ4plex (N-term)                | YES     | NO     |
| 46364         | 45.4          | 1311.97                    | 1351.49                    | 872.32                     | 934.39        | 1.73            | 1.57            | 0.97            | 759.8677              | 2                  | -0.0063             | YGEYFPGTGDLR              |  | iTRAQ4plex (N-term)                                | YES     | NO     |
| 46367         | 56.83         | 916.58                     | 920.94                     | 612.97                     | 590.50        | 1.92            | 1.70            | 1.08            | 759.8807              | 2                  | 0.0197              | YGEYFPGTGDLR              |  | iTRAQ4plex (N-term)                                | YES     | NO     |
| 46368         | 55.88         | 1311.75                    | 1362.77                    | 866.52                     | 838.64        | 1.93            | 1.77            | 1.08            | 759.8817              | 2                  | 0.0216              | YGEYFPGTGDLR              |  | iTRAQ4plex (N-term)                                | YES     | NO     |
| 46371         | 48.69         | 570.05                     | 647.44                     | 416.54                     | 426.61        | 1.65            | 1.65            | 1.02            | 759.8885              | 2                  | 0.0351              | YGEYFPGTGDLR              |  | iTRAQ4plex (N-term)                                | YES     | NO     |
| 46373         | 59.54         | 989.03                     | 948.56                     | 647.71                     | 654.90        | 1.86            | 1.57            | 1.03            | 759.8930              | 2                  | 0.0441              | YGEYFPGTGDLR              |  | iTRAQ4plex (N-term)                                | YES     | NO     |
| 46375         | 53.58         | 1207.18                    | 1190.99                    | 767.16                     | 768.29        | 1.94            | 1.68            | 1.04            | 759.9009              | 2                  | 0.0600              | YGEYFPGTGDLR              |  | iTRAQ4plex (N-term)                                | YES     | NO     |
| 46377         | 55.63         | 1207.64                    | 1167.85                    | 769.26                     | 823.22        | 1.81            | 1.54            | 0.97            | 759.9061              | 2                  | 0.0704              | YGEYFPGTGDLR              |  | iTRAQ4plex (N-term)                                | YES     | NO     |
| 46378         | 55.26         | 0.00                       | 0.00                       | 0.00                       | 0.00          | 0.00            | 0.00            | 0.00            | 759.9069              | 2                  | 0.0721              | YGEYFPGTGDLR              |  | iTRAQ4plex (N-term)                                | YES     | NO     |
| 46411         | 50.96         | 3136.77                    | 3111.50                    | 1979.05                    | 2060.83       | 1.88            | 1.64            | 1.00            | 760.1040              | 2                  | 0.4661              | YGEYFPGTGDLR              |  | iTRAQ4plex (N-term)                                | YES     | NO     |
| 59031         | 47.86         | 1784.40                    | 1830.24                    | 1335.78                    | 1404.06       | 1.57            | 1.42            | 0.99            | 572.3112              | 3                  | 0.0518              | SIRPDNMSEYSK              |  | iTRAQ4plex (K); iTRAQ4plex (N-term)                | YES     | NO     |
| 59032         | 50.18         | 740.84                     | 758.02                     | 589.64                     | 585.71        | 1.56            | 1.41            | 1.05            | 572.3141              | 3                  | 0.0605              | SIRPDNMSEYSK              |  | iTRAQ4plex (K); iTRAQ4plex (N-term)                | YES     | NO     |
| 59829         | 41.14         | 1265.58                    | 1271.14                    | 1037.56                    | 1068.04       | 1.46            | 1.29            | 1.01            | 577.6239              | 3                  | -0.0050             | SIRPDNMSEYSK              |  | iTRAQ4plex (K); iTRAQ4plex (N-term); Oxidation (M) | YES     | NO     |
| 59845         | 49.53         | 1955.22                    | 1938.92                    | 1601.91                    | 1664.98       | 1.45            | 1.27            | 1.00            | 577.6585              | 3                  | 0.0988              | SIRPDNMSEYSK              |  | iTRAQ4plex (K); iTRAQ4plex (N-term); Oxidation (M) | YES     | NO     |
| 74371         | 53.51         | 432.75                     | 462.72                     | 377.80                     | 410.54        | 1.30            | 1.23            | 0.96            | 670.0527              | 3                  | 0.1496              | QQTDMAVNWAGLHHAHAK        |  | iTRAQ4plex (K)                                     | YES     | YES    |
| 80427         | 55.26         | 375.66                     | 467.24                     | 468.67                     | 535.44        | 0.87            | 0.95            | 0.91            | 538.7991              | 4                  | 0.0785              | QQTDMAVNWAGLHHAHAK        |  | iTRAQ4plex (K); iTRAQ4plex (N-term)                | YES     | YES    |
| 80436         | 54.44         | 330.40                     | 330.25                     | 297.75                     | 327.27        | 1.25            | 1.10            | 0.95            | 538.8140              | 4                  | 0.1381              | QQTDMAVNWAGLHHAHAK        |  | iTRAQ4plex (K); iTRAQ4plex (N-term)                | YES     | YES    |
| 80439         | 57.82         | 128.70                     | 114.85                     | 114.16                     | 128.75        | 1.23            | 0.97            | 0.92            | 538.8243              | 4                  | 0.1794              | QQTDMAVNWAGLHHAHAK        |  | iTRAQ4plex (K); iTRAQ4plex (N-term)                | YES     | YES    |
| 89892         | 56.74         | 310.36                     | 332.00                     | 214.55                     | 256.01        | 1.50            | 1.41            | 0.87            | 819.7798              | 3                  | 0.0013              | DGIDDESIEAIFKPIISK        |  | 2 iTRAQ4plex (K); iTRAQ4plex (N-term)              | YES     | YES    |



|       |       |         |         |         |         |      |      |      |          |   |        |                    |                                       |     |     |
|-------|-------|---------|---------|---------|---------|------|------|------|----------|---|--------|--------------------|---------------------------------------|-----|-----|
| 89896 | 72.87 | 623.95  | 752.37  | 540.46  | 603.93  | 1.28 | 1.35 | 0.93 | 819.8065 | 3 | 0.0812 | DGIDDESYGQIFKPIISK | 2 iTRAQ4plex (K); iTRAQ4plex (N-term) | YES | YES |
| 89898 | 64.43 | 1655.26 | 1587.07 | 1104.83 | 1124.70 | 1.82 | 1.53 | 1.02 | 819.8088 | 3 | 0.0881 | DGIDDESYGQIFKPIISK | 2 iTRAQ4plex (K); iTRAQ4plex (N-term) | YES | YES |
| 89899 | 62.46 | 530.85  | 507.50  | 358.82  | 417.35  | 1.57 | 1.32 | 0.90 | 615.1170 | 4 | 0.1224 | DGIDDESYGQIFKPIISK | 2 iTRAQ4plex (K); iTRAQ4plex (N-term) | YES | YES |
| 89900 | 59.18 | 893.83  | 1108.41 | 800.95  | 829.85  | 1.33 | 1.45 | 1.01 | 819.8290 | 3 | 0.1489 | DGIDDESYGQIFKPIISK | 2 iTRAQ4plex (K); iTRAQ4plex (N-term) | YES | YES |

## DNA damage response proteins

### DNA-(apurinic or apyrimidinic site) lyase - Homo sapiens (Human)

| Accession No. | Protein Score | Normalized Ratio (114/117) | Normalized Ratio (115/117) | Normalized Ratio (116/117) | STD (114/117) | STD (115/117)   | STD (116/117)   | Mass            | Sequence Coverage (%) | Identified Peptide | Quantitated Peptide | Identified Unique Peptide |                                                      |         |        |
|---------------|---------------|----------------------------|----------------------------|----------------------------|---------------|-----------------|-----------------|-----------------|-----------------------|--------------------|---------------------|---------------------------|------------------------------------------------------|---------|--------|
| P27695        | 782           | 4.58                       | 4.18                       | 1.19                       | 1.43          | 1.62            | 0.19            | 35532           | 21.7                  | 29                 | 26                  | 6                         |                                                      |         |        |
| Spectrum No.  | Peptide Score | Int. 114                   | Int. 115                   | Int. 116                   | Int. 117      | Ratio (114/117) | Ratio (115/117) | Ratio (116/117) | Precursor m/z (Da)    | Charge             | Mass Error (Da)     | Peptide Sequence          | Modification                                         | Labeled | Unique |
| 27179         | 75.18         | 454.40                     | 479.94                     | 139.16                     | 76.26         | 7.36            | 6.84            | 1.90            | 638.3237              | 2                  | 0.0104              | GAVAEDGDEL R              | iTRAQ4plex (N-term)                                  | YES     | YES    |
| 27182         | 76.92         | 402.32                     | 434.23                     | 98.07                      | 95.15         | 5.22            | 4.96            | 1.07            | 638.3289              | 2                  | 0.0208              | GAVAEDGDEL R              | iTRAQ4plex (N-term)                                  | YES     | YES    |
| 27185         | 98.06         | 949.24                     | 1038.00                    | 259.48                     | 212.29        | 5.52            | 5.31            | 1.27            | 638.3326              | 2                  | 0.0282              | GAVAEDGDEL R              | iTRAQ4plex (N-term)                                  | YES     | YES    |
| 27186         | 58.7          | 371.62                     | 368.98                     | 101.07                     | 63.08         | 7.27            | 6.36            | 1.67            | 638.3351              | 2                  | 0.0332              | GAVAEDGDEL R              | iTRAQ4plex (N-term)                                  | YES     | YES    |
| 27187         | 75.37         | 510.60                     | 570.11                     | 122.06                     | 99.94         | 6.31            | 6.20            | 1.27            | 638.3364              | 2                  | 0.0358              | GAVAEDGDEL R              | iTRAQ4plex (N-term)                                  | YES     | YES    |
| 27191         | 79.55         | 1096.76                    | 1112.22                    | 327.08                     | 261.17        | 5.18            | 4.63            | 1.30            | 638.3386              | 2                  | 0.0402              | GAVAEDGDEL R              | iTRAQ4plex (N-term)                                  | YES     | YES    |
| 27710         | 47.82         | 1339.93                    | 1353.62                    | 496.55                     | 424.30        | 3.90            | 3.47            | 1.22            | 641.3490              | 2                  | -0.0012             | EGYSGVGLLS R              | iTRAQ4plex (N-term)                                  | YES     | YES    |
| 27711         | 44.89         | 259.16                     | 291.89                     | 59.01                      | 53.05         | 6.03            | 5.98            | 1.16            | 641.3492              | 2                  | -0.0008             | EGYSGVGLLS R              | iTRAQ4plex (N-term)                                  | YES     | YES    |
| 27728         | 58.34         | 769.53                     | 823.28                     | 237.02                     | 208.51        | 4.56            | 4.29            | 1.18            | 641.3650              | 2                  | 0.0308              | EGYSGVGLLS R              | iTRAQ4plex (N-term)                                  | YES     | YES    |
| 27732         | 62.53         | 1192.39                    | 1180.30                    | 366.95                     | 339.31        | 4.34            | 3.78            | 1.13            | 641.3688              | 2                  | 0.0384              | EGYSGVGLLS R              | iTRAQ4plex (N-term)                                  | YES     | YES    |
| 27733         | 67.23         | 1380.74                    | 1412.91                    | 409.19                     | 348.17        | 4.90            | 4.41            | 1.22            | 641.3724              | 2                  | 0.0456              | EGYSGVGLLS R              | iTRAQ4plex (N-term)                                  | YES     | YES    |
| 27735         | 40.03         | 607.47                     | 576.60                     | 179.72                     | 169.34        | 4.43            | 3.70            | 1.11            | 641.3737              | 2                  | 0.0483              | EGYSGVGLLS R              | iTRAQ4plex (N-term)                                  | YES     | YES    |
| 27737         | 46.75         | 1086.93                    | 1153.66                    | 396.42                     | 320.01        | 4.19            | 3.92            | 1.29            | 641.3741              | 2                  | 0.0490              | EGYSGVGLLS R              | iTRAQ4plex (N-term)                                  | YES     | YES    |
| 27739         | 62.92         | 1234.59                    | 1320.42                    | 444.88                     | 392.66        | 3.88            | 3.66            | 1.18            | 641.3785              | 2                  | 0.0577              | EGYSGVGLLS R              | iTRAQ4plex (N-term)                                  | YES     | YES    |
| 27747         | 41.69         | 0.00                       | 0.00                       | 0.00                       | 0.00          | 0.00            | 0.00            | 0.00            | 641.3841              | 2                  | 0.0690              | EGYSGVGLLS R              | iTRAQ4plex (N-term)                                  | YES     | YES    |
| 48509         | 68.11         | 1308.76                    | 1412.26                    | 568.50                     | 470.01        | 3.44            | 3.27            | 1.26            | 516.6140              | 3                  | 0.0007              | KGAVAEDGDEL R             | iTRAQ4plex (K); iTRAQ4plex (N-term)                  | YES     | YES    |
| 48510         | 81.06         | 1510.18                    | 1640.97                    | 614.62                     | 486.70        | 3.83            | 3.66            | 1.32            | 516.6171              | 3                  | 0.0101              | KGAVAEDGDEL R             | iTRAQ4plex (K); iTRAQ4plex (N-term)                  | YES     | YES    |
| 48518         | 53.95         | 1131.76                    | 1161.98                    | 525.18                     | 487.21        | 2.87            | 2.59            | 1.12            | 516.6344              | 3                  | 0.0620              | KGAVAEDGDEL R             | iTRAQ4plex (K); iTRAQ4plex (N-term)                  | YES     | YES    |
| 48524         | 64.9          | 1383.27                    | 1436.47                    | 578.61                     | 554.53        | 3.08            | 2.82            | 1.09            | 516.6423              | 3                  | 0.0856              | KGAVAEDGDEL R             | iTRAQ4plex (K); iTRAQ4plex (N-term)                  | YES     | YES    |
| 77228         | 57.81         | 653.30                     | 585.06                     | 174.23                     | 167.57        | 4.81            | 3.79            | 1.08            | 692.3757              | 3                  | 0.0632              | GAVAEDGDEL R TEPEAK       | iTRAQ4plex (K); iTRAQ4plex (N-term)                  | YES     | YES    |
| 77229         | 50.33         | 2694.74                    | 2662.91                    | 682.46                     | 625.63        | 5.32            | 4.63            | 1.14            | 692.3760              | 3                  | 0.0640              | GAVAEDGDEL R TEPEAK       | iTRAQ4plex (K); iTRAQ4plex (N-term)                  | YES     | YES    |
| 77238         | 56.55         | 2178.28                    | 1885.87                    | 472.24                     | 444.86        | 6.05            | 4.61            | 1.11            | 692.3829              | 3                  | 0.0848              | GAVAEDGDEL R TEPEAK       | iTRAQ4plex (K); iTRAQ4plex (N-term)                  | YES     | YES    |
| 77239         | 40.36         | 595.27                     | 586.72                     | 166.60                     | 158.92        | 4.62            | 4.01            | 1.09            | 692.3835              | 3                  | 0.0864              | GAVAEDGDEL R TEPEAK       | iTRAQ4plex (K); iTRAQ4plex (N-term)                  | YES     | YES    |
| 77242         | 46.9          | 1137.17                    | 991.60                     | 235.18                     | 250.43        | 5.61            | 4.30            | 0.98            | 692.3886              | 3                  | 0.1017              | GAVAEDGDEL R TEPEAK       | iTRAQ4plex (K); iTRAQ4plex (N-term)                  | YES     | YES    |
| 77254         | 45.23         | 1586.62                    | 1518.95                    | 468.75                     | 375.39        | 5.22            | 4.40            | 1.30            | 692.4037              | 3                  | 0.1470              | GAVAEDGDEL R TEPEAK       | iTRAQ4plex (K); iTRAQ4plex (N-term)                  | YES     | YES    |
| 87612         | 48.26         | 92.56                      | 121.76                     | 25.49                      | 12.73         | 8.98            | 10.40           | 2.09            | 790.4768              | 3                  | 0.1672              | LDYFLLSHSLL PALCDSK       | iTRAQ4plex (K); iTRAQ4plex (N-term); Methylthio (C)  | YES     | YES    |
| 95312         | 57.81         | 1081.61                    | 1169.49                    | 248.32                     | 250.66        | 5.33            | 5.07            | 1.03            | 918.8508              | 3                  | 0.1038              | LPALQLPLGSHQYWSAPSDK      | iTRAQ4plex (K); iTRAQ4plex (N-term)                  | YES     | YES    |
| 95317         | 45.34         | 536.38                     | 531.13                     | 104.19                     | 99.78         | 6.64            | 5.79            | 1.09            | 918.8686              | 3                  | 0.1572              | LPALQLPLGSHQYWSAPSDK      | iTRAQ4plex (K); iTRAQ4plex (N-term)                  | YES     | YES    |
| 95340         | 47.01         | 62.49                      | 75.61                      | 22.76                      | 21.90         | 3.52            | 3.75            | 1.08            | 689.7000              | 4                  | 0.3601              | LPALQLPLGSHQYWSAPSDK      | Deamidated (NQ); iTRAQ4plex (K); iTRAQ4plex (N-term) | YES     | YES    |

### Telomeric repeat-binding factor 2-interacting protein 1 - Homo sapiens (Human)

| Accession No. | Protein Score | Normalized Ratio (114/117) | Normalized Ratio (115/117) | Normalized Ratio (116/117) | STD (114/117) | STD (115/117)   | STD (116/117)   | Mass            | Sequence Coverage (%) | Identified Peptide | Quantitated Peptide | Identified Unique Peptide         |                                       |         |        |
|---------------|---------------|----------------------------|----------------------------|----------------------------|---------------|-----------------|-----------------|-----------------|-----------------------|--------------------|---------------------|-----------------------------------|---------------------------------------|---------|--------|
| Q9NYB0        | 93            | 3.18                       | 4.39                       | 1.18                       | 0.76          | 2.67            | 0.01            | 44233           | 11.5                  | 3                  | 2                   | 2                                 |                                       |         |        |
| Spectrum No.  | Peptide Score | Int. 114                   | Int. 115                   | Int. 116                   | Int. 117      | Ratio (114/117) | Ratio (115/117) | Ratio (116/117) | Precursor m/z (Da)    | Charge             | Mass Error (Da)     | Peptide Sequence                  | Modification                          | Labeled | Unique |
| 84088         | 46.76         | 142.56                     | 171.98                     | 52.23                      | 46.48         | 3.79            | 4.02            | 1.17            | 749.7043              | 3                  | -0.0117             | KA EEDPEAADS GEPQNK               | 2 iTRAQ4plex (K); iTRAQ4plex (N-term) | YES     | YES    |
| 84100         | 41.36         | 49.55                      | 72.69                      | 12.46                      | 9.37          | 6.53            | 8.44            | 1.39            | 749.7525              | 3                  | 0.1329              | KA EEDPEAADS GEPQNK               | 2 iTRAQ4plex (K); iTRAQ4plex (N-term) | YES     | YES    |
| 98200         | 54.55         | 170.80                     | 260.21                     | 87.98                      | 77.78         | 2.71            | 3.64            | 1.18            | 759.9446              | 4                  | 0.2091              | LGPASAAAD T GSEAKPGALAE GAAEPEPQR | iTRAQ4plex (K); iTRAQ4plex (N-term)   | YES     | YES    |

### High mobility group protein B3 - Homo sapiens (Human)

| Accession No. | Protein Score | Normalized Ratio (114/117) | Normalized Ratio (115/117) | Normalized Ratio (116/117) | STD (114/117) | STD (115/117) | STD (116/117) | Mass | Sequence Coverage (%) | Identified Peptide | Quantitated Peptide | Identified Unique Peptide |  |  |
|---------------|---------------|----------------------------|----------------------------|----------------------------|---------------|---------------|---------------|------|-----------------------|--------------------|---------------------|---------------------------|--|--|
|---------------|---------------|----------------------------|----------------------------|----------------------------|---------------|---------------|---------------|------|-----------------------|--------------------|---------------------|---------------------------|--|--|

| O15347       | 132           | 2.45     | 2.33     | 1.18     | 0.30     | 0.24            | 0.16            | 22965           | 7.0                | 4      | 4               | 1                |                                       |         |        |  |
|--------------|---------------|----------|----------|----------|----------|-----------------|-----------------|-----------------|--------------------|--------|-----------------|------------------|---------------------------------------|---------|--------|--|
| Spectrum No. | Peptide Score | Int. 114 | Int. 115 | Int. 116 | Int. 117 | Ratio (114/117) | Ratio (115/117) | Ratio (116/117) | Precursor m/z (Da) | Charge | Mass Error (Da) | Peptide Sequence | Modification                          | Labeled | Unique |  |
| 75668        | 45.82         | 240.52   | 224.23   | 115.46   | 112.58   | 2.64            | 2.16            | 1.07            | 680.0421           | 3      | -0.0216         | KNPEVPVNFVAFESK  | 2 iTRAQ4plex (K); iTRAQ4plex (N-term) | YES     | YES    |  |
| 75671        | 61.67         | 185.10   | 195.05   | 98.09    | 90.39    | 2.53            | 2.35            | 1.13            | 680.0521           | 3      | 0.0085          | KNPEVPVNFVAFESK  | 2 iTRAQ4plex (K); iTRAQ4plex (N-term) | YES     | YES    |  |
| 75685        | 46.65         | 124.10   | 144.87   | 58.31    | 58.23    | 2.63            | 2.70            | 1.04            | 680.0759           | 3      | 0.0799          | KNPEVPVNFVAFESK  | 2 iTRAQ4plex (K); iTRAQ4plex (N-term) | YES     | YES    |  |
| 75689        | 56.14         | 170.67   | 216.65   | 139.35   | 104.51   | 2.02            | 2.25            | 1.39            | 680.0902           | 3      | 0.1228          | KNPEVPVNFVAFESK  | 2 iTRAQ4plex (K); iTRAQ4plex (N-term) | YES     | YES    |  |

### DNA topoisomerase 2-binding protein 1 - Homo sapiens (Human)

| Accession No. | Protein Score | Normalized Ratio (114/117) | Normalized Ratio (115/117) | Normalized Ratio (116/117) | STD (114/117) | STD (115/117)   | STD (116/117)   | Mass            | Sequence Coverage (%) | Identified Peptide | Quantitated Peptide | Identified Unique Peptide |                                       |         |        |
|---------------|---------------|----------------------------|----------------------------|----------------------------|---------------|-----------------|-----------------|-----------------|-----------------------|--------------------|---------------------|---------------------------|---------------------------------------|---------|--------|
| Q92547        | 41            | 2.43                       | 2.45                       | 1.14                       | -             | -               | -               | 170571          | 0.7                   | 1                  | 1                   | 1                         |                                       |         |        |
| Spectrum No.  | Peptide Score | Int. 114                   | Int. 115                   | Int. 116                   | Int. 117      | Ratio (114/117) | Ratio (115/117) | Ratio (116/117) | Precursor m/z (Da)    | Charge             | Mass Error (Da)     | Peptide Sequence          | Modification                          | Labeled | Unique |
| 53520         | 40.55         | 65.50                      | 75.01                      | 36.34                      | 33.29         | 2.43            | 2.45            | 1.14            | 543.0226              | 3                  | -0.0137             | KPILLPSWIK                | 2 iTRAQ4plex (K); iTRAQ4plex (N-term) | YES     | YES    |

### Mediator of DNA damage checkpoint protein 1 - Homo sapiens (Human)

| Accession No. | Protein Score | Normalized Ratio (114/117) | Normalized Ratio (115/117) | Normalized Ratio (116/117) | STD (114/117) | STD (115/117)   | STD (116/117)   | Mass            | Sequence Coverage (%) | Identified Peptide | Quantitated Peptide | Identified Unique Peptide          |                                                        |         |        |
|---------------|---------------|----------------------------|----------------------------|----------------------------|---------------|-----------------|-----------------|-----------------|-----------------------|--------------------|---------------------|------------------------------------|--------------------------------------------------------|---------|--------|
| Q14676        | 427           | 1.28                       | 1.34                       | 1.01                       | 0.21          | 0.44            | 0.14            | 226529          | 7.3                   | 15                 | 10                  | 8                                  |                                                        |         |        |
| Spectrum No.  | Peptide Score | Int. 114                   | Int. 115                   | Int. 116                   | Int. 117      | Ratio (114/117) | Ratio (115/117) | Ratio (116/117) | Precursor m/z (Da)    | Charge             | Mass Error (Da)     | Peptide Sequence                   | Modification                                           | Labeled | Unique |
| 22474         | 45.11         | 608.65                     | 617.34                     | 733.08                     | 753.39        | 1.00            | 0.89            | 1.01            | 610.8464              | 2                  | -0.0263             | VLFTGVVDAR                         | iTRAQ4plex (N-term)                                    | YES     | YES    |
| 22491         | 42.57         | 588.57                     | 671.70                     | 598.95                     | 606.38        | 1.20            | 1.20            | 1.03            | 610.8680              | 2                  | 0.0167              | VLFTGVVDAR                         | iTRAQ4plex (N-term)                                    | YES     | YES    |
| 48594         | 41.75         | 202.51                     | 224.65                     | 141.08                     | 173.43        | 1.44            | 1.41            | 0.85            | 517.0017              | 3                  | 0.0555              | EVPPGSAIIHIK                       | iTRAQ4plex (K); iTRAQ4plex (N-term)                    | YES     | YES    |
| 48595         | 42.32         | 571.19                     | 690.69                     | 406.94                     | 406.00        | 1.74            | 1.85            | 1.04            | 517.0044              | 3                  | 0.0636              | EVPPGSAIIHIK                       | iTRAQ4plex (K); iTRAQ4plex (N-term)                    | YES     | YES    |
| 62788         | 59.24         | 0.00                       | 0.00                       | 0.00                       | 0.00          | 0.00            | 0.00            | 0.00            | 593.6933              | 3                  | 0.0621              | GIPILSLDWLHQSR                     | iTRAQ4plex (N-term)                                    | YES     | YES    |
| 62789         | 51.73         | 8.73                       | 13.27                      | 7.05                       | 4.67          | 2.31            | 3.09            | 1.57            | 593.6935              | 3                  | 0.0626              | GIPILSLDWLHQSR                     | iTRAQ4plex (N-term)                                    | YES     | YES    |
| 77592         | 41.57         | 33.29                      | 35.41                      | 20.35                      | 15.05         | 2.73            | 2.56            | 1.41            | 695.4432              | 3                  | 0.0179              | VGLPILLSPEFLLTGVLK                 | iTRAQ4plex (K); iTRAQ4plex (N-term)                    | YES     | YES    |
| 81250         | 40.17         | 50.84                      | 57.82                      | 37.41                      | 56.26         | 1.12            | 1.12            | 0.69            | 724.7446              | 3                  | 0.0654              | SQLEPAEGDAGAEWAAAVLK               | iTRAQ4plex (K); iTRAQ4plex (N-term)                    | YES     | YES    |
| 86008         | 72.16         | 38.12                      | 43.90                      | 27.68                      | 19.71         | 2.39            | 2.42            | 1.46            | 770.7760              | 3                  | 0.0601              | AVLALGGSLAGSAAEASHLVTDR            | iTRAQ4plex (N-term)                                    | YES     | YES    |
| 86009         | 82.59         | 124.80                     | 160.07                     | 115.16                     | 115.66        | 1.33            | 1.50            | 1.04            | 770.7788              | 3                  | 0.0683              | AVLALGGSLAGSAAEASHLVTDR            | iTRAQ4plex (N-term)                                    | YES     | YES    |
| 86015         | 67.22         | 22.36                      | 32.17                      | 16.10                      | 26.24         | 1.05            | 1.33            | 0.64            | 770.7866              | 3                  | 0.0917              | AVLALGGSLAGSAAEASHLVTDR            | iTRAQ4plex (N-term)                                    | YES     | YES    |
| 86019         | 64.07         | 100.17                     | 141.62                     | 78.86                      | 100.31        | 1.23            | 1.53            | 0.82            | 770.7957              | 3                  | 0.1191              | AVLALGGSLAGSAAEASHLVTDR            | iTRAQ4plex (N-term)                                    | YES     | YES    |
| 90944         | 66.87         | 276.61                     | 369.34                     | 270.15                     | 240.47        | 1.42            | 1.67            | 1.17            | 833.8281              | 3                  | 0.1626              | AHEVGAQGGPPVAQVEQDLPISR            | iTRAQ4plex (N-term)                                    | YES     | YES    |
| 102063        | 55.19         | 183.45                     | 227.62                     | 146.04                     | 171.20        | 1.32            | 1.45            | 0.89            | 982.3085              | 4                  | 0.1726              | TPKPVPEAASDLEPFTPTDQSVTPEAIAQGGQSK | 2 iTRAQ4plex (K); iTRAQ4plex (N-term)                  | YES     | YES    |
| 102066        | 45.13         | 207.02                     | 199.10                     | 215.27                     | 229.11        | 1.12            | 0.94            | 0.98            | 982.5313              | 4                  | 0.0798              | TPKPVPEAASDLEPFTPTDQSVTPEAIAQGGQSK | Deamidated (NQ); 2 iTRAQ4plex (K); iTRAQ4plex (N-term) | YES     | YES    |

### Telomeric repeat-binding factor 2 - Homo sapiens (Human)

| Accession No. | Protein Score | Normalized Ratio (114/117) | Normalized Ratio (115/117) | Normalized Ratio (116/117) | STD (114/117) | STD (115/117)   | STD (116/117)   | Mass            | Sequence Coverage (%) | Identified Peptide | Quantitated Peptide | Identified Unique Peptide |                                       |         |        |
|---------------|---------------|----------------------------|----------------------------|----------------------------|---------------|-----------------|-----------------|-----------------|-----------------------|--------------------|---------------------|---------------------------|---------------------------------------|---------|--------|
| Q15554        | 188           | 3.96                       | 3.64                       | 1.12                       | 0.63          | 0.40            | 0.07            | 55517           | 9.0                   | 8                  | 7                   | 3                         |                                       |         |        |
| Spectrum No.  | Peptide Score | Int. 114                   | Int. 115                   | Int. 116                   | Int. 117      | Ratio (114/117) | Ratio (115/117) | Ratio (116/117) | Precursor m/z (Da)    | Charge             | Mass Error (Da)     | Peptide Sequence          | Modification                          | Labeled | Unique |
| 43755         | 62.96         | 1921.51                    | 2074.46                    | 684.30                     | 642.13        | 3.69            | 3.51            | 1.11            | 742.4124              | 2                  | 0.0392              | YEGGNWAAISK               | iTRAQ4plex (K); iTRAQ4plex (N-term)   | YES     | YES    |
| 43757         | 57.17         | 1085.84                    | 1107.85                    | 358.48                     | 332.76        | 4.03            | 3.62            | 1.12            | 742.4168              | 2                  | 0.0480              | YEGGNWAAISK               | iTRAQ4plex (K); iTRAQ4plex (N-term)   | YES     | YES    |
| 60491         | 40.43         | 318.24                     | 388.18                     | 130.84                     | 119.72        | 3.28            | 3.52            | 1.14            | 581.3679              | 3                  | 0.0291              | DIMQALLVRPLGK             | iTRAQ4plex (K); iTRAQ4plex (N-term)   | YES     | YES    |
| 60495         | 45.94         | 275.23                     | 288.62                     | 100.96                     | 108.17        | 3.14            | 2.90            | 0.97            | 581.3732              | 3                  | 0.0449              | DIMQALLVRPLGK             | iTRAQ4plex (K); iTRAQ4plex (N-term)   | YES     | YES    |
| 60496         | 46.54         | 321.52                     | 324.10                     | 94.91                      | 82.40         | 4.82            | 4.28            | 1.20            | 581.3742              | 3                  | 0.0480              | DIMQALLVRPLGK             | iTRAQ4plex (K); iTRAQ4plex (N-term)   | YES     | YES    |
| 60499         | 47.56         | 460.94                     | 503.01                     | 154.93                     | 149.53        | 3.81            | 3.66            | 1.08            | 581.3894              | 3                  | 0.0936              | DIMQALLVRPLGK             | iTRAQ4plex (K); iTRAQ4plex (N-term)   | YES     | YES    |
| 92629         | 51.26         | 486.60                     | 569.77                     | 178.30                     | 170.41        | 3.53            | 3.63            | 1.09            | 859.7879              | 3                  | 0.0851              | KDENESSAPADGEGGSELQPK     | 2 iTRAQ4plex (K); iTRAQ4plex (N-term) | YES     | YES    |
| 92630         | 60.8          | 703.79                     | 660.75                     | 217.97                     | 190.53        | 4.56            | 3.77            | 1.19            | 859.7905              | 3                  | 0.0928              | KDENESSAPADGEGGSELQPK     | 2 iTRAQ4plex (K); iTRAQ4plex (N-term) | YES     | YES    |

### High mobility group protein 1-like 10 - Homo sapiens (Human)

| Accession No. | Protein Score | Normalized Ratio (114/117) | Normalized Ratio (115/117) | Normalized Ratio (116/117) | STD (114/117) | STD (115/117)   | STD (116/117)   | Mass            | Sequence Coverage (%) | Identified Peptide | Quantitated Peptide | Identified Unique Peptide |                                     |         |        |
|---------------|---------------|----------------------------|----------------------------|----------------------------|---------------|-----------------|-----------------|-----------------|-----------------------|--------------------|---------------------|---------------------------|-------------------------------------|---------|--------|
| Q9UGV6        | 48            | 2.08                       | 2.31                       | 1.02                       | -             | -               | -               | 24203           | 6.2                   | 1                  | 1                   | 1                         |                                     |         |        |
| Spectrum No.  | Peptide Score | Int. 114                   | Int. 115                   | Int. 116                   | Int. 117      | Ratio (114/117) | Ratio (115/117) | Ratio (116/117) | Precursor m/z (Da)    | Charge             | Mass Error (Da)     | Peptide Sequence          | Modification                        | Labeled | Unique |
| 49776         | 47.54         | 364.78                     | 460.88                     | 212.78                     | 216.96        | 2.08            | 2.31            | 1.02            | 523.3099              | 3                  | 0.0469              | GEHPGLSIGDVAK             | iTRAQ4plex (K); iTRAQ4plex (N-term) | YES     | YES    |

### DNA repair protein RAD50 - Homo sapiens (Human)

| Accession No. | Protein Score | Normalized Ratio (114/117) | Normalized Ratio (115/117) | Normalized Ratio (116/117) | STD (114/117) | STD (115/117)   | STD (116/117)   | Mass            | Sequence Coverage (%) | Identified Peptide | Quantitated Peptide | Identified Unique Peptide |                                     |         |        |
|---------------|---------------|----------------------------|----------------------------|----------------------------|---------------|-----------------|-----------------|-----------------|-----------------------|--------------------|---------------------|---------------------------|-------------------------------------|---------|--------|
| Q92878        | 83            | 1.96                       | 1.81                       | 1.05                       | 0.27          | 0.25            | 0.09            | 153797          | 1.8                   | 4                  | 4                   | 2                         |                                     |         |        |
| Spectrum No.  | Peptide Score | Int. 114                   | Int. 115                   | Int. 116                   | Int. 117      | Ratio (114/117) | Ratio (115/117) | Ratio (116/117) | Precursor m/z (Da)    | Charge             | Mass Error (Da)     | Peptide Sequence          | Modification                        | Labeled | Unique |
| 48819         | 44.08         | 436.42                     | 428.96                     | 267.76                     | 258.52        | 2.08            | 1.80            | 1.08            | 518.3071              | 3                  | 0.0819              | GYEEIIHFK                 | iTRAQ4plex (K); iTRAQ4plex (N-term) | YES     | YES    |
| 48823         | 44.31         | 61.68                      | 66.22                      | 36.92                      | 31.27         | 2.43            | 2.30            | 1.23            | 518.3118              | 3                  | 0.0960              | GYEEIIHFK                 | iTRAQ4plex (K); iTRAQ4plex (N-term) | YES     | YES    |
| 69822         | 45.35         | 474.32                     | 534.00                     | 323.19                     | 323.92        | 1.81            | 1.79            | 1.04            | 637.0546              | 3                  | 0.0746              | LIQDQQEQIQHLK             | iTRAQ4plex (K); iTRAQ4plex (N-term) | YES     | YES    |
| 69823         | 58.38         | 658.23                     | 688.31                     | 414.43                     | 417.66        | 1.95            | 1.79            | 1.03            | 637.0624              | 3                  | 0.0981              | LIQDQQEQIQHLK             | iTRAQ4plex (K); iTRAQ4plex (N-term) | YES     | YES    |

### Others

#### Calcineurin-binding protein Cabin-1 - Homo sapiens (Human)

| Accession No. | Protein Score | Normalized Ratio (114/117) | Normalized Ratio (115/117) | Normalized Ratio (116/117) | STD (114/117) | STD (115/117)   | STD (116/117)   | Mass            | Sequence Coverage (%) | Identified Peptide | Quantitated Peptide | Identified Unique Peptide |                                     |         |        |
|---------------|---------------|----------------------------|----------------------------|----------------------------|---------------|-----------------|-----------------|-----------------|-----------------------|--------------------|---------------------|---------------------------|-------------------------------------|---------|--------|
| Q9Y6J0        | 51            | 2.07                       | 1.75                       | 1.00                       | -             | -               | -               | 246197          | 0.9                   | 1                  | 1                   | 1                         |                                     |         |        |
| Spectrum No.  | Peptide Score | Int. 114                   | Int. 115                   | Int. 116                   | Int. 117      | Ratio (114/117) | Ratio (115/117) | Ratio (116/117) | Precursor m/z (Da)    | Charge             | Mass Error (Da)     | Peptide Sequence          | Modification                        | Labeled | Unique |
| 85508         | 51.37         | 325.74                     | 313.01                     | 186.05                     | 194.31        | 2.07            | 1.75            | 1.00            | 765.0775              | 3                  | 0.0631              | IAALNASSTIEDDHEGSFK       | iTRAQ4plex (K); iTRAQ4plex (N-term) | YES     | YES    |

#### Ephexin-1 - Homo sapiens (Human)

| Accession No. | Protein Score | Normalized Ratio (114/117) | Normalized Ratio (115/117) | Normalized Ratio (116/117) | STD (114/117) | STD (115/117)   | STD (116/117)   | Mass            | Sequence Coverage (%) | Identified Peptide | Quantitated Peptide | Identified Unique Peptide |                                                |         |        |
|---------------|---------------|----------------------------|----------------------------|----------------------------|---------------|-----------------|-----------------|-----------------|-----------------------|--------------------|---------------------|---------------------------|------------------------------------------------|---------|--------|
| Q8N5V2        | 40            | 1.93                       | 1.63                       | 1.09                       | -             | -               | -               | 82445           | 1.8                   | 1                  | 1                   | 1                         |                                                |         |        |
| Spectrum No.  | Peptide Score | Int. 114                   | Int. 115                   | Int. 116                   | Int. 117      | Ratio (114/117) | Ratio (115/117) | Ratio (116/117) | Precursor m/z (Da)    | Charge             | Mass Error (Da)     | Peptide Sequence          | Modification                                   | Labeled | Unique |
| 60397         | 40.5          | 292.39                     | 280.68                     | 196.22                     | 186.89        | 1.93            | 1.63            | 1.09            | 581.0227              | 3                  | 0.1432              | KMSRTEQMISIQK             | Deamidated (NQ); iTRAQ4plex (K); Oxidation (M) | YES     | YES    |

#### ZZ-type zinc finger-containing protein 3 - Homo sapiens (Human)

| Accession No. | Protein Score | Normalized Ratio (114/117) | Normalized Ratio (115/117) | Normalized Ratio (116/117) | STD (114/117) | STD (115/117)   | STD (116/117)   | Mass            | Sequence Coverage (%) | Identified Peptide | Quantitated Peptide | Identified Unique Peptide |                                     |         |        |
|---------------|---------------|----------------------------|----------------------------|----------------------------|---------------|-----------------|-----------------|-----------------|-----------------------|--------------------|---------------------|---------------------------|-------------------------------------|---------|--------|
| Q81YH5        | 82            | 1.77                       | 1.60                       | 1.08                       | 0.10          | 0.18            | 0.06            | 101960          | 3.4                   | 3                  | 3                   | 2                         |                                     |         |        |
| Spectrum No.  | Peptide Score | Int. 114                   | Int. 115                   | Int. 116                   | Int. 117      | Ratio (114/117) | Ratio (115/117) | Ratio (116/117) | Precursor m/z (Da)    | Charge             | Mass Error (Da)     | Peptide Sequence          | Modification                        | Labeled | Unique |
| 32198         | 48.01         | 885.32                     | 883.86                     | 642.40                     | 633.21        | 1.73            | 1.52            | 1.06            | 446.6136              | 3                  | 0.0119              | LNIGHLPSAK                | iTRAQ4plex (K); iTRAQ4plex (N-term) | YES     | YES    |
| 32201         | 43.69         | 267.11                     | 294.40                     | 189.09                     | 172.20        | 1.92            | 1.86            | 1.14            | 446.6235              | 3                  | 0.0418              | LNIGHLPSAK                | iTRAQ4plex (K); iTRAQ4plex (N-term) | YES     | YES    |
| 94091         | 55.2          | 37.28                      | 35.88                      | 29.93                      | 24.62         | 1.87            | 1.58            | 1.27            | 892.1461              | 3                  | 0.0491              | VVQLPEIVWDQYTHSLGNFER     | iTRAQ4plex (N-term)                 | YES     | YES    |

#### Neuron navigator 3 - Homo sapiens (Human)

| Accession No. | Protein Score | Normalized Ratio (114/117) | Normalized Ratio (115/117) | Normalized Ratio (116/117) | STD (114/117) | STD (115/117)   | STD (116/117)   | Mass            | Sequence Coverage (%) | Identified Peptide | Quantitated Peptide | Identified Unique Peptide |                |         |        |
|---------------|---------------|----------------------------|----------------------------|----------------------------|---------------|-----------------|-----------------|-----------------|-----------------------|--------------------|---------------------|---------------------------|----------------|---------|--------|
| Q8IVL0        | 40            | 1.93                       | 2.01                       | 1.12                       | -             | -               | -               | 255461          | 0.4                   | 1                  | 1                   | 1                         |                |         |        |
| Spectrum No.  | Peptide Score | Int. 114                   | Int. 115                   | Int. 116                   | Int. 117      | Ratio (114/117) | Ratio (115/117) | Ratio (116/117) | Precursor m/z (Da)    | Charge             | Mass Error (Da)     | Peptide Sequence          | Modification   | Labeled | Unique |
| 20476         | 40.38         | 377.09                     | 445.75                     | 258.65                     | 240.92        | 1.93            | 2.01            | 1.12            | 599.3889              | 2                  | 0.0382              | LKPPVSEGVK                | iTRAQ4plex (K) | YES     | YES    |

### Uncharacterized protein C6orf174 precursor - Homo sapiens (Human)

| Accession No. | Protein Score | Normalized Ratio (114/117) | Normalized Ratio (115/117) | Normalized Ratio (116/117) | STD (114/117) | STD (115/117)   | STD (116/117)   | Mass            | Sequence Coverage (%) | Identified Peptide | Quantitated Peptide | Identified Unique Peptide |                                                      |         |        |
|---------------|---------------|----------------------------|----------------------------|----------------------------|---------------|-----------------|-----------------|-----------------|-----------------------|--------------------|---------------------|---------------------------|------------------------------------------------------|---------|--------|
| Q5TF21        | 152           | 1.78                       | 1.67                       | 0.90                       | 0.17          | 0.17            | 0.09            | 103136          | 1.4                   | 7                  | 7                   | 1                         |                                                      |         |        |
| Spectrum No.  | Peptide Score | Int. 114                   | Int. 115                   | Int. 116                   | Int. 117      | Ratio (114/117) | Ratio (115/117) | Ratio (116/117) | Precursor m/z (Da)    | Charge             | Mass Error (Da)     | Peptide Sequence          | Modification                                         | Labeled | Unique |
| 42961         | 45.69         | 123.38                     | 131.10                     | 51.59                      | 70.55         | 2.16            | 2.02            | 0.76            | 736.4125              | 2                  | 0.0249              | AAAAAAAAQMHAK             | Deamidated (NQ); iTRAQ4plex (K); iTRAQ4plex (N-term) | YES     | YES    |
| 42962         | 44.3          | 250.18                     | 240.98                     | 136.30                     | 167.63        | 1.84            | 1.56            | 0.85            | 736.4183              | 2                  | 0.0365              | AAAAAAAAQMHAK             | Deamidated (NQ); iTRAQ4plex (K); iTRAQ4plex (N-term) | YES     | YES    |
| 42968         | 47.1          | 593.16                     | 641.95                     | 387.27                     | 439.93        | 1.66            | 1.59            | 0.92            | 736.4234              | 2                  | 0.0466              | AAAAAAAAQMHAK             | Deamidated (NQ); iTRAQ4plex (K); iTRAQ4plex (N-term) | YES     | YES    |
| 42972         | 53.19         | 172.09                     | 195.55                     | 106.22                     | 112.02        | 1.90            | 1.90            | 0.99            | 736.4248              | 2                  | 0.0494              | AAAAAAAAQMHAK             | Deamidated (NQ); iTRAQ4plex (K); iTRAQ4plex (N-term) | YES     | YES    |
| 42974         | 53.21         | 259.59                     | 270.58                     | 164.52                     | 170.33        | 1.88            | 1.73            | 1.01            | 736.4267              | 2                  | 0.0532              | AAAAAAAAQMHAK             | Deamidated (NQ); iTRAQ4plex (K); iTRAQ4plex (N-term) | YES     | YES    |
| 42983         | 42.03         | 234.96                     | 251.84                     | 137.65                     | 169.55        | 1.71            | 1.61            | 0.85            | 736.4343              | 2                  | 0.0684              | AAAAAAAAQMHAK             | Deamidated (NQ); iTRAQ4plex (K); iTRAQ4plex (N-term) | YES     | YES    |
| 42988         | 45.04         | 468.85                     | 507.48                     | 284.30                     | 333.70        | 1.73            | 1.65            | 0.89            | 736.4365              | 2                  | 0.0729              | AAAAAAAAQMHAK             | Deamidated (NQ); iTRAQ4plex (K); iTRAQ4plex (N-term) | YES     | YES    |

### Cytoskeleton-associated protein 5 - Homo sapiens (Human)

| Accession No. | Protein Score | Normalized Ratio (114/117) | Normalized Ratio (115/117) | Normalized Ratio (116/117) | STD (114/117) | STD (115/117)   | STD (116/117)   | Mass            | Sequence Coverage (%) | Identified Peptide | Quantitated Peptide | Identified Unique Peptide |                                       |         |        |
|---------------|---------------|----------------------------|----------------------------|----------------------------|---------------|-----------------|-----------------|-----------------|-----------------------|--------------------|---------------------|---------------------------|---------------------------------------|---------|--------|
| Q14008        | 173           | 2.07                       | 2.12                       | 1.02                       | 0.14          | 0.38            | 0.31            | 225366          | 3.4                   | 7                  | 3                   | 3                         |                                       |         |        |
| Spectrum No.  | Peptide Score | Int. 114                   | Int. 115                   | Int. 116                   | Int. 117      | Ratio (114/117) | Ratio (115/117) | Ratio (116/117) | Precursor m/z (Da)    | Charge             | Mass Error (Da)     | Peptide Sequence          | Modification                          | Labeled | Unique |
| 43775         | 40.69         | 0.00                       | 0.00                       | 0.00                       | 0.00          | 0.00            | 0.00            | 0.00            | 742.4454              | 2                  | 0.0436              | VNDFLAEIFK                | iTRAQ4plex (K); iTRAQ4plex (N-term)   | YES     | YES    |
| 43779         | 41.96         | 0.00                       | 0.00                       | 0.00                       | 0.00          | 0.00            | 0.00            | 0.00            | 742.4516              | 2                  | 0.0560              | VNDFLAEIFK                | iTRAQ4plex (K); iTRAQ4plex (N-term)   | YES     | YES    |
| 59076         | 52.89         | 33.36                      | 32.25                      | 25.77                      | 8.81          | 4.68            | 3.98            | 3.05            | 572.6691              | 3                  | 0.0164              | GKPAAPGGAGNTGTGK          | 2 iTRAQ4plex (K); iTRAQ4plex (N-term) | YES     | YES    |
| 59794         | 45.97         | 152.18                     | 191.13                     | 93.13                      | 96.62         | 1.94            | 2.15            | 1.00            | 577.3350              | 3                  | 0.0509              | ALAVMVDHLESEK             | iTRAQ4plex (K); iTRAQ4plex (N-term)   | YES     | YES    |
| 59802         | 58.13         | 341.15                     | 392.47                     | 173.51                     | 195.80        | 2.15            | 2.18            | 0.92            | 577.3442              | 3                  | 0.0783              | ALAVMVDHLESEK             | iTRAQ4plex (K); iTRAQ4plex (N-term)   | YES     | YES    |
| 61482         | 68.63         | 0.00                       | 0.00                       | 0.00                       | 0.00          | 0.00            | 0.00            | 0.00            | 587.0171              | 3                  | 0.1005              | DLMHGLITLMLDSR            | iTRAQ4plex (N-term)                   | YES     | YES    |
| 75279         | 54.57         | 50.09                      | 45.60                      | 47.03                      | 32.84         | 1.88            | 1.51            | 1.49            | 677.0672              | 3                  | 0.0550              | GLEAALVYVENAHVAGK         | iTRAQ4plex (K); iTRAQ4plex (N-term)   | YES     | YES    |

### Spliceosome RNA helicase BAT1 - Homo sapiens (Human)

| Accession No. | Protein Score | Normalized Ratio (114/117) | Normalized Ratio (115/117) | Normalized Ratio (116/117) | STD (114/117) | STD (115/117)   | STD (116/117)   | Mass            | Sequence Coverage (%) | Identified Peptide | Quantitated Peptide | Identified Unique Peptide |                                     |         |        |
|---------------|---------------|----------------------------|----------------------------|----------------------------|---------------|-----------------|-----------------|-----------------|-----------------------|--------------------|---------------------|---------------------------|-------------------------------------|---------|--------|
| Q13838        | 214           | 1.88                       | 1.83                       | 1.24                       | -             | -               | -               | 48960           | 15.9                  | 13                 | 1                   | 1                         |                                     |         |        |
| Spectrum No.  | Peptide Score | Int. 114                   | Int. 115                   | Int. 116                   | Int. 117      | Ratio (114/117) | Ratio (115/117) | Ratio (116/117) | Precursor m/z (Da)    | Charge             | Mass Error (Da)     | Peptide Sequence          | Modification                        | Labeled | Unique |
| 18992         | 53.5          | 289.96                     | 301.78                     | 229.31                     | 230.38        | 1.55            | 1.42            | 1.04            | 590.3288              | 2                  | 0.0521              | MLEQLDMR                  | iTRAQ4plex (N-term)                 | YES     | NO     |
| 22702         | 48.18         | 799.63                     | 818.28                     | 855.23                     | 883.70        | 1.12            | 1.01            | 1.01            | 612.3799              | 2                  | 0.0287              | ELAFQISK                  | iTRAQ4plex (K); iTRAQ4plex (N-term) | YES     | NO     |
| 22705         | 47.47         | 1407.00                    | 1349.97                    | 1320.66                    | 1398.22       | 1.24            | 1.05            | 0.98            | 612.3826              | 2                  | 0.0341              | ELAFQISK                  | iTRAQ4plex (K); iTRAQ4plex (N-term) | YES     | NO     |
| 22709         | 48.23         | 1052.64                    | 1268.07                    | 1250.42                    | 1311.46       | 0.99            | 1.05            | 0.99            | 612.3874              | 2                  | 0.0438              | ELAFQISK                  | iTRAQ4plex (K); iTRAQ4plex (N-term) | YES     | NO     |
| 24862         | 43.42         | 568.02                     | 598.88                     | 535.43                     | 547.31        | 1.28            | 1.19            | 1.02            | 624.3779              | 2                  | -0.0106             | ILVATNLFGR                | iTRAQ4plex (N-term)                 | YES     | NO     |
| 24871         | 41.91         | 529.24                     | 638.02                     | 473.93                     | 532.04        | 1.23            | 1.30            | 0.93            | 624.3861              | 2                  | 0.0058              | ILVATNLFGR                | iTRAQ4plex (N-term)                 | YES     | NO     |
| 24872         | 44.47         | 151.00                     | 150.01                     | 98.80                      | 112.40        | 1.66            | 1.45            | 0.92            | 624.3920              | 2                  | 0.0175              | ILVATNLFGR                | iTRAQ4plex (N-term)                 | YES     | NO     |
| 39549         | 43.79         | 0.00                       | 0.00                       | 0.00                       | 0.00          | 0.00            | 0.00            | 0.00            | 713.4543              | 2                  | 0.0304              | VAVFFGGLSIK               | iTRAQ4plex (K); iTRAQ4plex (N-term) | YES     | YES    |
| 39553         | 40.21         | 1199.46                    | 1126.97                    | 1134.38                    | 1227.83       | 1.21            | 1.00            | 0.96            | 713.4637              | 2                  | 0.0494              | VAVFFGGLSIK               | iTRAQ4plex (K); iTRAQ4plex (N-term) | YES     | YES    |
| 60991         | 47.74         | 437.79                     | 410.63                     | 338.07                     | 401.38        | 1.35            | 1.11            | 0.88            | 584.3601              | 3                  | 0.0562              | LTLHGLQQYYVK              | iTRAQ4plex (K); iTRAQ4plex (N-term) | YES     | NO     |
| 60993         | 42.24         | 512.07                     | 596.57                     | 489.99                     | 514.35        | 1.23            | 1.26            | 0.99            | 584.3606              | 3                  | 0.0579              | LTLHGLQQYYVK              | iTRAQ4plex (K); iTRAQ4plex (N-term) | YES     | NO     |
| 61000         | 42            | 307.40                     | 329.77                     | 294.30                     | 265.43        | 1.43            | 1.35            | 1.15            | 584.3741              | 3                  | 0.0984              | LTLHGLQQYYVK              | iTRAQ4plex (K); iTRAQ4plex (N-term) | YES     | NO     |
| 89482         | 57.4          | 148.71                     | 164.63                     | 116.58                     | 97.59         | 1.88            | 1.83            | 1.24            | 815.4205              | 3                  | 0.1160              | VNIAFNYDMPEDSDTYLHR       | iTRAQ4plex (N-term)                 | YES     | YES    |

### GTP-binding nuclear protein Ran - Homo sapiens (Human)

| Accession No. | Protein Score | Normalized Ratio (114/117) | Normalized Ratio (115/117) | Normalized Ratio (116/117) | STD (114/117) | STD (115/117)   | STD (116/117)   | Mass            | Sequence Coverage (%) | Identified Peptide | Quantitated Peptide | Identified Unique Peptide |              |         |        |
|---------------|---------------|----------------------------|----------------------------|----------------------------|---------------|-----------------|-----------------|-----------------|-----------------------|--------------------|---------------------|---------------------------|--------------|---------|--------|
| P62826        | 45            | 2.86                       | 1.68                       | 1.21                       | -             | -               | -               | 24408           | 8.3                   | 1                  | 1                   | 1                         |              |         |        |
| Spectrum No.  | Peptide Score | Int. 114                   | Int. 115                   | Int. 116                   | Int. 117      | Ratio (114/117) | Ratio (115/117) | Ratio (116/117) | Precursor m/z (Da)    | Charge             | Mass Error (Da)     | Peptide Sequence          | Modification | Labeled | Unique |

|       |       |       |       |       |       |      |      |      |          |   |        |                     |                     |     |     |
|-------|-------|-------|-------|-------|-------|------|------|------|----------|---|--------|---------------------|---------------------|-----|-----|
| 82251 | 45.32 | 76.97 | 51.27 | 38.65 | 33.21 | 2.86 | 1.68 | 1.21 | 549.8300 | 4 | 0.0936 | YVATLGVVEVHPLVFHTNR | iTRAQ4plex (N-term) | YES | YES |
|-------|-------|-------|-------|-------|-------|------|------|------|----------|---|--------|---------------------|---------------------|-----|-----|

### Thymocyte nuclear protein 1 - Homo sapiens (Human)

| Accession No. | Protein Score | Normalized Ratio (114/117) | Normalized Ratio (115/117) | Normalized Ratio (116/117) | STD (114/117) | STD (115/117)   | STD (116/117)   | Mass            | Sequence Coverage (%) | Identified Peptide | Quantitated Peptide | Identified Unique Peptide |                                       |         |        |
|---------------|---------------|----------------------------|----------------------------|----------------------------|---------------|-----------------|-----------------|-----------------|-----------------------|--------------------|---------------------|---------------------------|---------------------------------------|---------|--------|
| Q9P016        | 138           | 2.52                       | 2.19                       | 0.95                       | -             | -               | -               | 25681           | 8.9                   | 5                  | 1                   | 1                         |                                       |         |        |
| Spectrum No.  | Peptide Score | Int. 114                   | Int. 115                   | Int. 116                   | Int. 117      | Ratio (114/117) | Ratio (115/117) | Ratio (116/117) | Precursor m/z (Da)    | Charge             | Mass Error (Da)     | Peptide Sequence          | Modification                          | Labeled | Unique |
| 22334         | 66.21         | 0.00                       | 0.00                       | 0.00                       | 0.00          | 0.00            | 0.00            | 0.00            | 609.9074              | 2                  | 0.0375              | FIPLAELK                  | iTRAQ4plex (K); iTRAQ4plex (N-term)   | YES     | NO     |
| 22335         | 66.09         | 0.00                       | 0.00                       | 0.00                       | 0.00          | 0.00            | 0.00            | 0.00            | 609.9076              | 2                  | 0.0380              | FIPLAELK                  | iTRAQ4plex (K); iTRAQ4plex (N-term)   | YES     | NO     |
| 22336         | 47.26         | 1491.91                    | 1504.69                    | 652.87                     | 697.12        | 2.64            | 2.35            | 0.98            | 609.9076              | 2                  | 0.0380              | FIPLAELK                  | iTRAQ4plex (K); iTRAQ4plex (N-term)   | YES     | NO     |
| 22338         | 65.85         | 0.00                       | 0.00                       | 0.00                       | 0.00          | 0.00            | 0.00            | 0.00            | 609.9153              | 2                  | 0.0533              | FIPLAELK                  | iTRAQ4plex (K); iTRAQ4plex (N-term)   | YES     | NO     |
| 56952         | 41.8          | 835.52                     | 824.14                     | 371.80                     | 409.44        | 2.52            | 2.19            | 0.95            | 560.9972              | 3                  | 0.0279              | TKTENSGEALAK              | 2 iTRAQ4plex (K); iTRAQ4plex (N-term) | YES     | YES    |

### Zinc finger protein 462 - Homo sapiens (Human)

| Accession No. | Protein Score | Normalized Ratio (114/117) | Normalized Ratio (115/117) | Normalized Ratio (116/117) | STD (114/117) | STD (115/117)   | STD (116/117)   | Mass            | Sequence Coverage (%) | Identified Peptide | Quantitated Peptide | Identified Unique Peptide |                                     |         |        |
|---------------|---------------|----------------------------|----------------------------|----------------------------|---------------|-----------------|-----------------|-----------------|-----------------------|--------------------|---------------------|---------------------------|-------------------------------------|---------|--------|
| Q96JM2        | 76            | 2.02                       | 1.90                       | 1.03                       | 0.20          | 0.17            | 0.06            | 161426          | 2.1                   | 2                  | 2                   | 2                         |                                     |         |        |
| Spectrum No.  | Peptide Score | Int. 114                   | Int. 115                   | Int. 116                   | Int. 117      | Ratio (114/117) | Ratio (115/117) | Ratio (116/117) | Precursor m/z (Da)    | Charge             | Mass Error (Da)     | Peptide Sequence          | Modification                        | Labeled | Unique |
| 45364         | 60.36         | 648.24                     | 687.88                     | 383.22                     | 374.07        | 2.14            | 2.00            | 1.07            | 753.4277              | 2                  | 0.0245              | VNLDQLEQMK                | iTRAQ4plex (K); iTRAQ4plex (N-term) | YES     | YES    |
| 93412         | 48.26         | 423.86                     | 456.78                     | 264.31                     | 281.65        | 1.86            | 1.76            | 0.98            | 657.5946              | 4                  | -0.0101             | LQSTAELTSHLNHNEEFQK       | iTRAQ4plex (K); iTRAQ4plex (N-term) | YES     | YES    |

### Bromodomain-containing protein 7 - Homo sapiens (Human)

| Accession No. | Protein Score | Normalized Ratio (114/117) | Normalized Ratio (115/117) | Normalized Ratio (116/117) | STD (114/117) | STD (115/117)   | STD (116/117)   | Mass            | Sequence Coverage (%) | Identified Peptide | Quantitated Peptide | Identified Unique Peptide |                                       |         |        |
|---------------|---------------|----------------------------|----------------------------|----------------------------|---------------|-----------------|-----------------|-----------------|-----------------------|--------------------|---------------------|---------------------------|---------------------------------------|---------|--------|
| Q9NPI1        | 207           | 1.77                       | 1.69                       | 0.99                       | 0.38          | 0.24            | 0.10            | 74092           | 6.9                   | 8                  | 8                   | 3                         |                                       |         |        |
| Spectrum No.  | Peptide Score | Int. 114                   | Int. 115                   | Int. 116                   | Int. 117      | Ratio (114/117) | Ratio (115/117) | Ratio (116/117) | Precursor m/z (Da)    | Charge             | Mass Error (Da)     | Peptide Sequence          | Modification                          | Labeled | Unique |
| 64784         | 47.91         | 681.16                     | 742.08                     | 441.55                     | 488.39        | 1.72            | 1.65            | 0.94            | 605.6840              | 3                  | 0.0701              | EMHLAEQVTNNLK             | iTRAQ4plex (K); iTRAQ4plex (N-term)   | YES     | YES    |
| 64792         | 47.79         | 761.34                     | 932.99                     | 517.24                     | 574.79        | 1.64            | 1.76            | 0.94            | 605.6907              | 3                  | 0.0903              | EMHLAEQVTNNLK             | iTRAQ4plex (K); iTRAQ4plex (N-term)   | YES     | YES    |
| 80261         | 45.46         | 187.29                     | 185.35                     | 148.84                     | 135.12        | 1.71            | 1.49            | 1.15            | 716.3520              | 3                  | 0.0551              | TLQEMEMSLPEDEGHTR         | iTRAQ4plex (N-term)                   | YES     | YES    |
| 80265         | 58.95         | 217.07                     | 246.30                     | 190.49                     | 182.18        | 1.47            | 1.47            | 1.09            | 716.3838              | 3                  | 0.1504              | TLQEMEMSLPEDEGHTR         | iTRAQ4plex (N-term)                   | YES     | YES    |
| 80266         | 58.28         | 58.77                      | 61.36                      | 37.68                      | 44.24         | 1.64            | 1.51            | 0.89            | 716.3842              | 3                  | 0.1516              | TLQEMEMSLPEDEGHTR         | iTRAQ4plex (N-term)                   | YES     | YES    |
| 80868         | 41.94         | 103.94                     | 152.85                     | 96.77                      | 111.49        | 1.15            | 1.49            | 0.90            | 721.6960              | 3                  | 0.0922              | TLQEMEMSLPEDEGHTR         | iTRAQ4plex (N-term); Oxidation (M)    | YES     | YES    |
| 80872         | 51.14         | 91.12                      | 94.05                      | 83.02                      | 88.17         | 1.28            | 1.16            | 0.98            | 721.7082              | 3                  | 0.1288              | TLQEMEMSLPEDEGHTR         | iTRAQ4plex (N-term); Oxidation (M)    | YES     | YES    |
| 85406         | 53.79         | 614.51                     | 574.62                     | 326.96                     | 315.71        | 2.40            | 1.98            | 1.08            | 763.7549              | 3                  | 0.0779              | NNDYQSIEELKDNFK           | 2 iTRAQ4plex (K); iTRAQ4plex (N-term) | YES     | YES    |

### UPF0609 protein C4orf27 - Homo sapiens (Human)

| Accession No. | Protein Score | Normalized Ratio (114/117) | Normalized Ratio (115/117) | Normalized Ratio (116/117) | STD (114/117) | STD (115/117)   | STD (116/117)   | Mass            | Sequence Coverage (%) | Identified Peptide | Quantitated Peptide | Identified Unique Peptide |                                     |         |        |
|---------------|---------------|----------------------------|----------------------------|----------------------------|---------------|-----------------|-----------------|-----------------|-----------------------|--------------------|---------------------|---------------------------|-------------------------------------|---------|--------|
| Q9NWW4        | 240           | 1.80                       | 1.72                       | 1.04                       | 0.45          | 0.46            | 0.14            | 39383           | 15.0                  | 10                 | 8                   | 4                         |                                     |         |        |
| Spectrum No.  | Peptide Score | Int. 114                   | Int. 115                   | Int. 116                   | Int. 117      | Ratio (114/117) | Ratio (115/117) | Ratio (116/117) | Precursor m/z (Da)    | Charge             | Mass Error (Da)     | Peptide Sequence          | Modification                        | Labeled | Unique |
| 34292         | 72.72         | 910.16                     | 941.94                     | 560.36                     | 551.84        | 2.04            | 1.86            | 1.06            | 682.3672              | 2                  | 0.0451              | TIVEAASDEER               | iTRAQ4plex (N-term)                 | YES     | YES    |
| 53573         | 43.03         | 242.04                     | 247.99                     | 151.95                     | 166.91        | 1.79            | 1.61            | 0.95            | 543.3343              | 3                  | 0.0474              | TFHGAGLVVVPVDK            | iTRAQ4plex (K); iTRAQ4plex (N-term) | YES     | YES    |
| 53576         | 59.74         | 278.00                     | 300.09                     | 209.27                     | 234.28        | 1.46            | 1.39            | 0.93            | 543.3383              | 3                  | 0.0592              | TFHGAGLVVVPVDK            | iTRAQ4plex (K); iTRAQ4plex (N-term) | YES     | YES    |
| 53578         | 56.04         | 306.61                     | 369.29                     | 245.80                     | 247.57        | 1.53            | 1.62            | 1.03            | 543.3389              | 3                  | 0.0611              | TFHGAGLVVVPVDK            | iTRAQ4plex (K); iTRAQ4plex (N-term) | YES     | YES    |
| 53579         | 42.16         | 379.64                     | 418.05                     | 341.78                     | 301.20        | 1.56            | 1.51            | 1.18            | 543.3416              | 3                  | 0.0693              | TFHGAGLVVVPVDK            | iTRAQ4plex (K); iTRAQ4plex (N-term) | YES     | YES    |
| 64040         | 52.41         | 50.67                      | 66.44                      | 18.09                      | 27.12         | 2.31            | 2.66            | 0.69            | 601.0448              | 3                  | 0.0010              | VAGQLLPLAYNLLK            | iTRAQ4plex (K); iTRAQ4plex (N-term) | YES     | YES    |
| 64672         | 49.28         | 78.82                      | 108.99                     | 43.22                      | 62.95         | 1.55            | 1.88            | 0.72            | 605.0020              | 3                  | 0.0192              | NLFAEIIIEHLANR            | iTRAQ4plex (N-term)                 | YES     | YES    |
| 64676         | 41.57         | 25.35                      | 32.26                      | 7.68                       | 11.62         | 2.69            | 3.02            | 0.69            | 605.0087              | 3                  | 0.0391              | NLFAEIIIEHLANR            | iTRAQ4plex (N-term)                 | YES     | YES    |
| 64689         | 92.71         | 0.00                       | 0.00                       | 0.00                       | 0.00          | 0.00            | 0.00            | 0.00            | 605.0203              | 3                  | 0.0741              | NLFAEIIIEHLANR            | iTRAQ4plex (N-term)                 | YES     | YES    |
| 64708         | 47.02         | 96.98                      | 101.02                     | 40.39                      | 44.08         | 2.72            | 2.49            | 0.95            | 605.0420              | 3                  | 0.1392              | NLFAEIIIEHLANR            | iTRAQ4plex (N-term)                 | YES     | YES    |

### Chromatin accessibility complex protein 1 - Homo sapiens (Human)

| Accession No. | Protein Score | Normalized Ratio (114/117) | Normalized Ratio (115/117) | Normalized Ratio (116/117) | STD (114/117) | STD (115/117)   | STD (116/117)   | Mass            | Sequence Coverage (%) | Identified Peptide | Quantitated Peptide | Identified Unique Peptide |                     |         |        |
|---------------|---------------|----------------------------|----------------------------|----------------------------|---------------|-----------------|-----------------|-----------------|-----------------------|--------------------|---------------------|---------------------------|---------------------|---------|--------|
| Q9NRG0        | 47            | 2.92                       | 2.50                       | 1.08                       | -             | -               | -               | 14701           | 6.1                   | 1                  | 1                   | 1                         |                     |         |        |
| Spectrum No.  | Peptide Score | Int. 114                   | Int. 115                   | Int. 116                   | Int. 117      | Ratio (114/117) | Ratio (115/117) | Ratio (116/117) | Precursor m/z (Da)    | Charge             | Mass Error (Da)     | Peptide Sequence          | Modification        | Labeled | Unique |
| 10073         | 47.04         | 225.61                     | 219.64                     | 98.43                      | 95.35         | 2.92            | 2.50            | 1.08            | 521.8515              | 2                  | 0.0217              | LISLPLSR                  | iTRAQ4plex (N-term) | YES     | YES    |

### YEATS domain-containing protein 2 - Homo sapiens (Human)

| Accession No. | Protein Score | Normalized Ratio (114/117) | Normalized Ratio (115/117) | Normalized Ratio (116/117) | STD (114/117) | STD (115/117)   | STD (116/117)   | Mass            | Sequence Coverage (%) | Identified Peptide | Quantitated Peptide | Identified Unique Peptide |                                                    |         |        |
|---------------|---------------|----------------------------|----------------------------|----------------------------|---------------|-----------------|-----------------|-----------------|-----------------------|--------------------|---------------------|---------------------------|----------------------------------------------------|---------|--------|
| Q9ULM3        | 198           | 1.82                       | 1.62                       | 1.01                       | 0.38          | 0.31            | 0.17            | 150688          | 6.1                   | 10                 | 7                   | 5                         |                                                    |         |        |
| Spectrum No.  | Peptide Score | Int. 114                   | Int. 115                   | Int. 116                   | Int. 117      | Ratio (114/117) | Ratio (115/117) | Ratio (116/117) | Precursor m/z (Da)    | Charge             | Mass Error (Da)     | Peptide Sequence          | Modification                                       | Labeled | Unique |
| 33256         | 43.14         | 218.74                     | 213.08                     | 129.15                     | 136.98        | 1.97            | 1.69            | 0.98            | 675.9684              | 2                  | 0.0342              | LLLIPQGAILR               | iTRAQ4plex (N-term)                                | YES     | YES    |
| 33259         | 42.9          | 199.13                     | 193.54                     | 119.31                     | 136.44        | 1.80            | 1.54            | 0.91            | 675.9845              | 2                  | 0.0664              | LLLIPQGAILR               | iTRAQ4plex (N-term)                                | YES     | YES    |
| 38648         | 52.4          | 347.31                     | 384.46                     | 261.54                     | 205.85        | 2.08            | 2.03            | 1.32            | 708.4298              | 2                  | 0.0549              | ATEQLVNDILR               | iTRAQ4plex (N-term)                                | YES     | YES    |
| 42202         | 41.11         | 0.00                       | 0.00                       | 0.00                       | 0.00          | 0.00            | 0.00            | 0.00            | 487.9855              | 3                  | 0.0398              | IGITLQPVALHR              | iTRAQ4plex (N-term)                                | YES     | YES    |
| 76135         | 62.32         | 161.64                     | 168.09                     | 108.47                     | 119.95        | 1.66            | 1.52            | 0.94            | 684.0546              | 3                  | 0.0499              | TTLFTQAAHGGQASLMK         | iTRAQ4plex (K); iTRAQ4plex (N-term)                | YES     | YES    |
| 76138         | 40.72         | 434.93                     | 453.35                     | 288.68                     | 326.56        | 1.64            | 1.51            | 0.92            | 684.0604              | 3                  | 0.0673              | TTLFTQAAHGGQASLMK         | iTRAQ4plex (K); iTRAQ4plex (N-term)                | YES     | YES    |
| 76842         | 41.2          | 562.45                     | 527.26                     | 339.70                     | 366.19        | 1.90            | 1.57            | 0.97            | 689.3943              | 3                  | 0.0740              | TTLFTQAAHGGQASLMK         | iTRAQ4plex (K); iTRAQ4plex (N-term); Oxidation (M) | YES     | YES    |
| 78685         | 48.15         | 5.83                       | 8.40                       | 8.01                       | 12.63         | 0.57            | 0.72            | 0.66            | 703.7842              | 3                  | 0.0860              | IDHLETIQQLLTAVVK          | iTRAQ4plex (K); iTRAQ4plex (N-term)                | YES     | YES    |
| 78687         | 48.21         | 12.80                      | 10.08                      | 4.94                       | 11.77         | 1.34            | 0.93            | 0.44            | 703.7922              | 3                  | 0.1098              | IDHLETIQQLLTAVVK          | iTRAQ4plex (K); iTRAQ4plex (N-term)                | YES     | YES    |
| 86996         | 44.75         | 42.96                      | 52.16                      | 41.71                      | 57.07         | 0.93            | 0.99            | 0.76            | 782.7652              | 3                  | 0.0387              | TYTGLQLGAETVVDVELHR       | iTRAQ4plex (N-term)                                | YES     | YES    |

### Serine/threonine-protein kinase VRK1 - Homo sapiens (Human)

| Accession No. | Protein Score | Normalized Ratio (114/117) | Normalized Ratio (115/117) | Normalized Ratio (116/117) | STD (114/117) | STD (115/117)   | STD (116/117)   | Mass            | Sequence Coverage (%) | Identified Peptide | Quantitated Peptide | Identified Unique Peptide |                                       |         |        |
|---------------|---------------|----------------------------|----------------------------|----------------------------|---------------|-----------------|-----------------|-----------------|-----------------------|--------------------|---------------------|---------------------------|---------------------------------------|---------|--------|
| Q99986        | 278           | 2.42                       | 2.28                       | 1.04                       | 0.42          | 0.40            | 0.13            | 45447           | 17.2                  | 12                 | 11                  | 7                         |                                       |         |        |
| Spectrum No.  | Peptide Score | Int. 114                   | Int. 115                   | Int. 116                   | Int. 117      | Ratio (114/117) | Ratio (115/117) | Ratio (116/117) | Precursor m/z (Da)    | Charge             | Mass Error (Da)     | Peptide Sequence          | Modification                          | Labeled | Unique |
| 11935         | 44.04         | 445.87                     | 456.61                     | 228.73                     | 220.25        | 2.50            | 2.25            | 1.08            | 537.3603              | 2                  | 0.0333              | TVLQLSLR                  | iTRAQ4plex (N-term)                   | YES     | YES    |
| 19674         | 53.9          | 265.35                     | 282.55                     | 154.78                     | 146.75        | 2.23            | 2.09            | 1.10            | 594.3968              | 2                  | 0.0262              | DILLQGLK                  | iTRAQ4plex (K); iTRAQ4plex (N-term)   | YES     | YES    |
| 29849         | 64.89         | 593.50                     | 574.99                     | 289.92                     | 292.38        | 2.51            | 2.14            | 1.03            | 654.8865              | 2                  | 0.0586              | ENIASLMDK                 | iTRAQ4plex (K); iTRAQ4plex (N-term)   | YES     | YES    |
| 31092         | 56.08         | 546.11                     | 594.49                     | 234.42                     | 254.86        | 2.65            | 2.54            | 0.96            | 662.4131              | 2                  | 0.0315              | ASNLLLNKY                 | iTRAQ4plex (K); iTRAQ4plex (N-term)   | YES     | YES    |
| 31096         | 51.17         | 993.93                     | 1053.38                    | 580.39                     | 565.83        | 2.17            | 2.02            | 1.07            | 662.4233              | 2                  | 0.0518              | ASNLLLNKY                 | iTRAQ4plex (K); iTRAQ4plex (N-term)   | YES     | YES    |
| 31097         | 65.25         | 2157.63                    | 2268.60                    | 1195.89                    | 1218.92       | 2.19            | 2.02            | 1.02            | 662.4295              | 2                  | 0.0642              | ASNLLLNKY                 | iTRAQ4plex (K); iTRAQ4plex (N-term)   | YES     | YES    |
| 32789         | 41.22         | 411.13                     | 443.29                     | 209.63                     | 168.12        | 3.02            | 2.87            | 1.30            | 449.2911              | 3                  | -0.0182             | KTVLQLSLR                 | iTRAQ4plex (K); iTRAQ4plex (N-term)   | YES     | YES    |
| 32790         | 40.77         | 574.17                     | 641.50                     | 245.31                     | 265.32        | 2.67            | 2.63            | 0.96            | 449.2937              | 3                  | -0.0102             | KTVLQLSLR                 | iTRAQ4plex (K); iTRAQ4plex (N-term)   | YES     | YES    |
| 77902         | 75.22         | 182.41                     | 229.66                     | 82.37                      | 110.06        | 2.05            | 2.27            | 0.78            | 697.7535              | 3                  | 0.0802              | DDGKLDLSVVENGLK           | 2 iTRAQ4plex (K); iTRAQ4plex (N-term) | YES     | YES    |
| 77905         | 49.42         | 213.90                     | 254.79                     | 115.60                     | 117.54        | 2.25            | 2.36            | 1.02            | 697.7565              | 3                  | 0.0891              | DDGKLDLSVVENGLK           | 2 iTRAQ4plex (K); iTRAQ4plex (N-term) | YES     | YES    |
| 80813         | 53.72         | 179.46                     | 176.86                     | 81.97                      | 94.13         | 2.35            | 2.04            | 0.91            | 721.0955              | 3                  | 0.1155              | HLAEQFAVGEIITDMAK         | iTRAQ4plex (K); iTRAQ4plex (N-term)   | YES     | YES    |
| 80819         | 46.89         | 115.50                     | 125.03                     | 101.72                     | 101.30        | 1.41            | 1.34            | 1.05            | 721.1116              | 3                  | 0.1638              | HLAEQFAVGEIITDMAK         | iTRAQ4plex (K); iTRAQ4plex (N-term)   | YES     | YES    |

### Metastasis-associated protein MTA3 - Homo sapiens (Human)

| Accession No. | Protein Score | Normalized Ratio (114/117) | Normalized Ratio (115/117) | Normalized Ratio (116/117) | STD (114/117) | STD (115/117)   | STD (116/117)   | Mass            | Sequence Coverage (%) | Identified Peptide | Quantitated Peptide | Identified Unique Peptide |                                     |         |        |
|---------------|---------------|----------------------------|----------------------------|----------------------------|---------------|-----------------|-----------------|-----------------|-----------------------|--------------------|---------------------|---------------------------|-------------------------------------|---------|--------|
| Q9BTC8        | 95            | 1.82                       | 1.74                       | 1.22                       | 0.26          | 0.07            | 0.35            | 67461           | 6.1                   | 5                  | 2                   | 2                         |                                     |         |        |
| Spectrum No.  | Peptide Score | Int. 114                   | Int. 115                   | Int. 116                   | Int. 117      | Ratio (114/117) | Ratio (115/117) | Ratio (116/117) | Precursor m/z (Da)    | Charge             | Mass Error (Da)     | Peptide Sequence          | Modification                        | Labeled | Unique |
| 25920         | 45.09         | 1200.23                    | 1238.68                    | 1305.23                    | 1350.03       | 1.10            | 1.00            | 1.01            | 630.3527              | 2                  | -0.0458             | TLLADQGEIR                | iTRAQ4plex (N-term)                 | YES     | NO     |
| 60322         | 42.33         | 104.84                     | 108.08                     | 89.10                      | 65.88         | 1.96            | 1.78            | 1.41            | 580.6502              | 3                  | 0.0454              | DITLPHAMDTLYR             | iTRAQ4plex (N-term)                 | YES     | YES    |
| 60324         | 60.99         | 0.00                       | 0.00                       | 0.00                       | 0.00          | 0.00            | 0.00            | 0.00            | 580.6561              | 3                  | 0.0632              | DITLPHAMDTLYR             | iTRAQ4plex (N-term)                 | YES     | YES    |
| 60329         | 42.91         | 63.48                      | 75.93                      | 42.66                      | 49.00         | 1.60            | 1.68            | 0.91            | 580.6683              | 3                  | 0.0995              | DITLPHAMDTLYR             | iTRAQ4plex (N-term)                 | YES     | YES    |
| 73380         | 41.65         | 0.00                       | 0.00                       | 0.00                       | 0.00          | 0.00            | 0.00            | 0.00            | 662.3942              | 3                  | 0.1350              | SLTSIIIEYYMWK             | iTRAQ4plex (K); iTRAQ4plex (N-term) | YES     | NO     |

**Deoxynucleotidyltransferase terminal-interacting protein 1 - Homo sapiens (Human)**

| Accession No. | Protein Score | Normalized Ratio (114/117) | Normalized Ratio (115/117) | Normalized Ratio (116/117) | STD (114/117) | STD (115/117)   | STD (116/117)   | Mass            | Sequence Coverage (%) | Identified Peptide | Quantitated Peptide | Identified Unique Peptide |                                     |         |        |
|---------------|---------------|----------------------------|----------------------------|----------------------------|---------------|-----------------|-----------------|-----------------|-----------------------|--------------------|---------------------|---------------------------|-------------------------------------|---------|--------|
| Spectrum No.  | Peptide Score | Int. 114                   | Int. 115                   | Int. 116                   | Int. 117      | Ratio (114/117) | Ratio (115/117) | Ratio (116/117) | Precursor m/z (Da)    | Charge             | Mass Error (Da)     | Peptide Sequence          | Modification                        | Labeled | Unique |
| Q9H147        | 132           | 2.01                       | 1.83                       | 0.98                       | 0.63          | 0.99            | 0.20            | 36990           | 14.6                  | 5                  | 5                   | 4                         |                                     |         |        |
| 20377         | 43.06         | 903.54                     | 872.77                     | 512.72                     | 540.06        | 2.07            | 1.76            | 0.99            | 598.8574              | 2                  | 0.0310              | LLFSDGEK                  | iTRAQ4plex (K); iTRAQ4plex (N-term) | YES     | YES    |
| 42618         | 45.33         | 532.80                     | 509.85                     | 505.75                     | 540.73        | 1.22            | 1.02            | 0.97            | 734.4094              | 2                  | 0.0191              | LNESTTFVLGSR              | iTRAQ4plex (N-term)                 | YES     | YES    |
| 52441         | 46.22         | 780.14                     | 793.06                     | 317.79                     | 380.91        | 2.53            | 2.26            | 0.87            | 805.9722              | 2                  | 0.0517              | SFVLPSWMVEK               | iTRAQ4plex (K); iTRAQ4plex (N-term) | YES     | YES    |
| 83094         | 65.7          | 108.39                     | 130.59                     | 65.31                      | 53.93         | 2.48            | 2.63            | 1.26            | 740.0842              | 3                  | 0.0060              | AVLQPSINEEIQTVFNK         | iTRAQ4plex (K); iTRAQ4plex (N-term) | YES     | YES    |
| 83113         | 46.78         | 84.51                      | 124.56                     | 47.39                      | 36.74         | 2.84            | 3.68            | 1.34            | 740.1318              | 3                  | 0.1488              | AVLQPSINEEIQTVFNK         | iTRAQ4plex (K); iTRAQ4plex (N-term) | YES     | YES    |

# Supplementary Figure 1

Query 35628 Hit 1

## MS/MS Fragmentation of **EMCTVEEPNNEFTSR**

Found in **O15516**, Circadian locomotor output cycles protein kaput - Homo sapiens (Human)

Match to Query 35628: 2042.792from(1022.403,2+)

Title: File: SCX225.wiff, Sample: ICAT (sample number 1), Elution: 22.384 min, Period: 1, Cycle(s): 1286 (Experiment 2)

Data File:Ku-ICAT\_SPROT-RESEARCHED

**Monoisotopic mass of neutral peptide Mr(calc):** 2042.792

### Variable modifications:

**M2** :Oxidation (M), with neutral losses 63.99828

**C3** :ICAT-C (C)

**Ions Score:** 63.57 **Expect:** 0.000

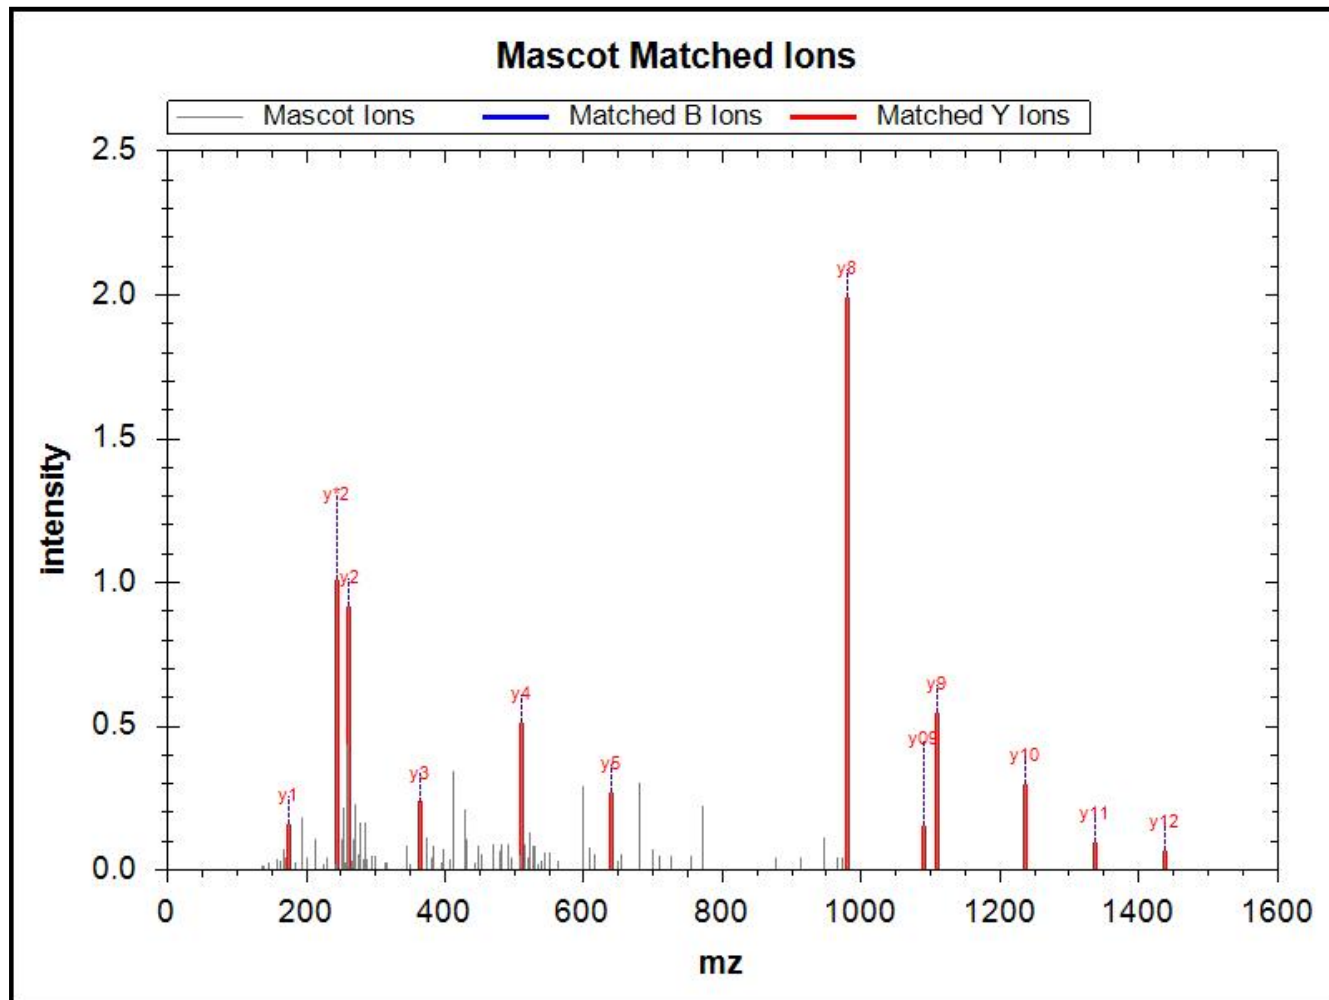

| No | b        | b++    | b*       | b*++   | b0       | b0++   | Seq | y               | y++    | y*            | y*++   | y0              | y0++   | RevNo |
|----|----------|--------|----------|--------|----------|--------|-----|-----------------|--------|---------------|--------|-----------------|--------|-------|
| 1  | 130.05   | 65.53  |          |        | 112.04   | 56.52  | E   |                 |        |               |        |                 |        | 15    |
| 2  | 277.09   | 139.05 |          |        | 259.07   | 130.04 | M   | 1,914.82        | 957.91 | 1,897.79      | 949.40 | 1,896.81        | 948.91 | 14    |
| 3  | 607.22   | 304.11 |          |        | 589.21   | 295.11 | C   | 1,767.79        | 884.40 | 1,750.76      | 875.88 | 1,749.77        | 875.39 | 13    |
| 4  | 708.27   | 354.64 |          |        | 690.26   | 345.63 | T   | <b>1,437.65</b> | 719.33 | 1,420.62      | 710.81 | 1,419.64        | 710.32 | 12    |
| 5  | 807.34   | 404.17 |          |        | 789.33   | 395.17 | V   | <b>1,336.60</b> | 668.80 | 1,319.57      | 660.29 | 1,318.59        | 659.80 | 11    |
| 6  | 936.38   | 468.69 |          |        | 918.37   | 459.69 | E   | <b>1,237.53</b> | 619.27 | 1,220.51      | 610.76 | 1,219.52        | 610.26 | 10    |
| 7  | 1,065.42 | 533.22 |          |        | 1,047.41 | 524.21 | E   | <b>1,108.49</b> | 554.75 | 1,091.46      | 546.24 | <b>1,090.48</b> | 545.74 | 9     |
| 8  | 1,162.48 | 581.74 |          |        | 1,144.46 | 572.74 | P   | <b>979.45</b>   | 490.23 | 962.42        | 481.71 | 961.44          | 481.22 | 8     |
| 9  | 1,276.52 | 638.76 | 1,259.49 | 630.25 | 1,258.51 | 629.76 | N   | 882.40          | 441.70 | 865.37        | 433.19 | 864.38          | 432.70 | 7     |
| 10 | 1,405.56 | 703.28 | 1,388.53 | 694.77 | 1,387.55 | 694.28 | E   | 768.35          | 384.68 | 751.33        | 376.17 | 750.34          | 375.67 | 6     |
| 11 | 1,534.60 | 767.81 | 1,517.58 | 759.29 | 1,516.59 | 758.80 | E   | <b>639.31</b>   | 320.16 | 622.28        | 311.65 | 621.30          | 311.15 | 5     |
| 12 | 1,681.67 | 841.34 | 1,664.65 | 832.83 | 1,663.66 | 832.33 | F   | <b>510.27</b>   | 255.64 | 493.24        | 247.12 | 492.26          | 246.63 | 4     |
| 13 | 1,782.72 | 891.86 | 1,765.69 | 883.35 | 1,764.71 | 882.86 | T   | <b>363.20</b>   | 182.10 | 346.17        | 173.59 | 345.19          | 173.10 | 3     |
| 14 | 1,869.75 | 935.38 | 1,852.73 | 926.87 | 1,851.74 | 926.37 | S   | <b>262.15</b>   | 131.58 | <b>245.12</b> | 123.07 | 244.14          | 122.57 | 2     |
| 15 |          |        |          |        |          |        | R   | <b>175.12</b>   | 88.06  | 158.09        | 79.55  |                 |        | 1     |



MS/MS Fragmentation of **ILQPMLDSSCSETPK**Found in **P55347**, Homeobox protein PKNOX1 - Homo sapiens (Human)

Match to Query 30453: 1890.691from(946.3527,2+)

Title: File: SCX224.wiff, Sample: ICAT (sample number 1), Elution: 23.273 min, Period: 1, Cycle(s): 1287 (Experiment 4)

Data File:Ku-ICAT\_SPROT-RESEARCHED

**Monoisotopic mass of neutral peptide Mr(calc):** 1890.691**Variable modifications:****M5** :Oxidation (M), with neutral losses 63.99828**C10** :ICAT-C (C)**Ions Score:** 36.76 **Expect:** 0.021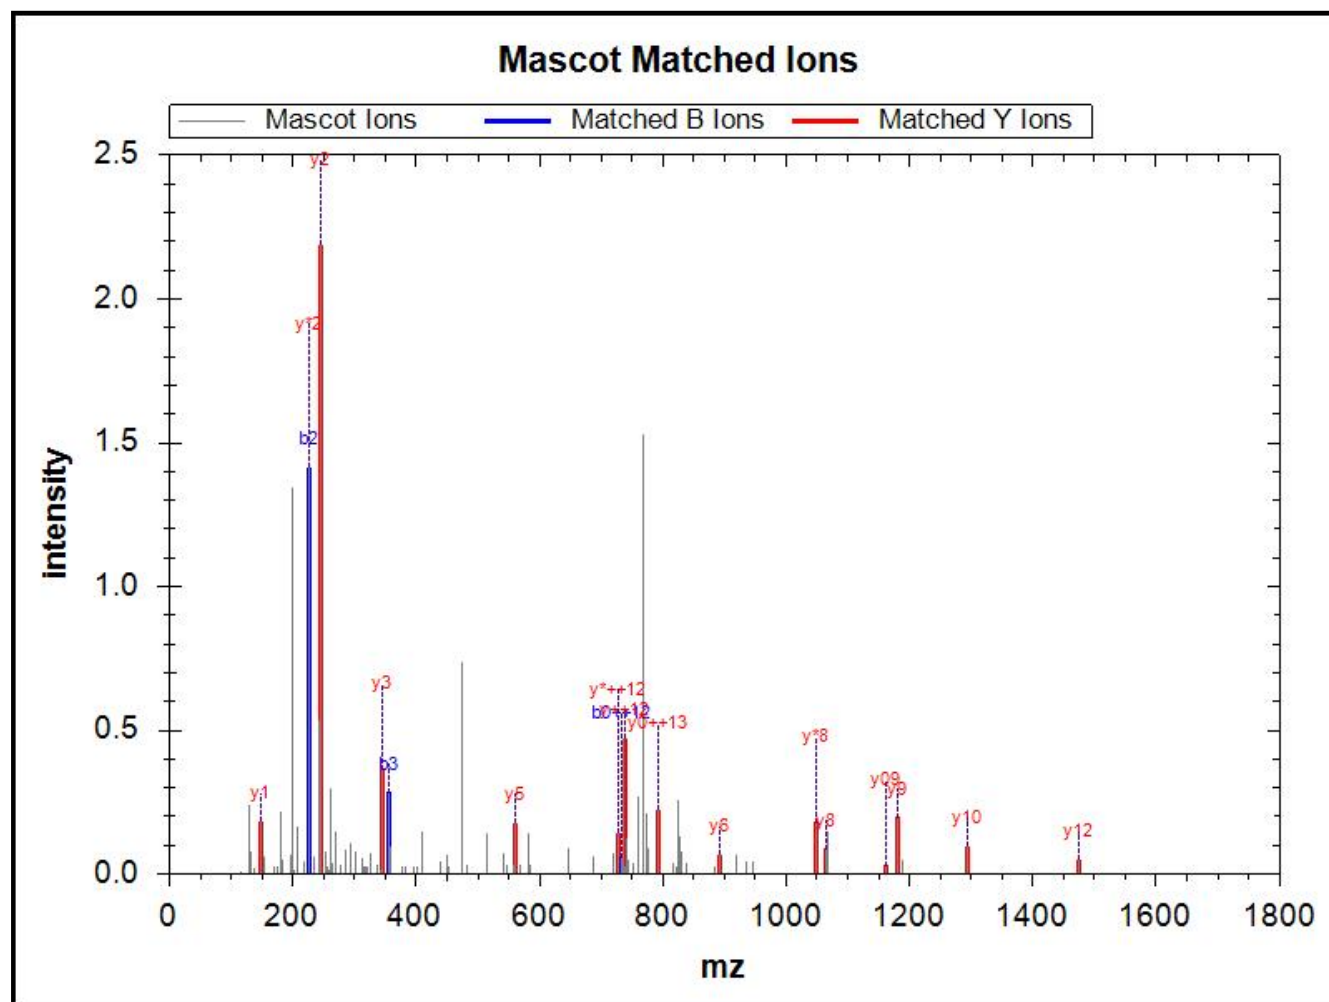

| No | b             | b++    | b*       | b*++   | b0       | b0++          | Seq | y               | y++           | y*              | y*++          | y0              | y0++          | RevNo |
|----|---------------|--------|----------|--------|----------|---------------|-----|-----------------|---------------|-----------------|---------------|-----------------|---------------|-------|
| 1  | 114.09        | 57.55  |          |        |          |               | I   |                 |               |                 |               |                 |               | 15    |
| 2  | <b>227.18</b> | 114.09 |          |        |          |               | L   | 1,714.83        | 857.92        | 1,697.81        | 849.41        | 1,696.82        | 848.91        | 14    |
| 3  | <b>355.23</b> | 178.12 | 338.21   | 169.61 |          |               | Q   | 1,601.75        | 801.38        | 1,584.72        | 792.86        | 1,583.74        | <b>792.37</b> | 13    |
| 4  | 452.29        | 226.65 | 435.26   | 218.13 |          |               | P   | <b>1,473.69</b> | <b>737.35</b> | 1,456.66        | <b>728.83</b> | 1,455.68        | 728.34        | 12    |
| 5  | 535.32        | 268.17 | 518.30   | 259.65 |          |               | M   | 1,376.64        | 688.82        | 1,359.61        | 680.31        | 1,358.63        | 679.82        | 11    |
| 6  | 648.41        | 324.71 | 631.38   | 316.19 |          |               | L   | <b>1,293.60</b> | 647.30        | 1,276.57        | 638.79        | 1,275.59        | 638.30        | 10    |
| 7  | 763.43        | 382.22 | 746.41   | 373.71 | 745.42   | 373.22        | D   | <b>1,180.52</b> | 590.76        | 1,163.49        | 582.25        | <b>1,162.50</b> | 581.76        | 9     |
| 8  | 850.47        | 425.74 | 833.44   | 417.22 | 832.46   | 416.73        | S   | <b>1,065.49</b> | 533.25        | <b>1,048.46</b> | 524.73        | 1,047.48        | 524.24        | 8     |
| 9  | 937.50        | 469.25 | 920.47   | 460.74 | 919.49   | 460.25        | S   | 978.46          | 489.73        | 961.43          | 481.22        | 960.45          | 480.73        | 7     |
| 10 | 1,267.64      | 634.32 | 1,250.61 | 625.81 | 1,249.62 | 625.32        | C   | <b>891.42</b>   | 446.22        | 874.40          | 437.70        | 873.41          | 437.21        | 6     |
| 11 | 1,354.67      | 677.84 | 1,337.64 | 669.32 | 1,336.66 | 668.83        | S   | <b>561.29</b>   | 281.15        | 544.26          | 272.63        | 543.28          | 272.14        | 5     |
| 12 | 1,483.71      | 742.36 | 1,466.68 | 733.85 | 1,465.70 | <b>733.35</b> | E   | 474.26          | 237.63        | 457.23          | 229.12        | 456.25          | 228.63        | 4     |
| 13 | 1,584.76      | 792.88 | 1,567.73 | 784.37 | 1,566.75 | 783.88        | T   | <b>345.21</b>   | 173.11        | 328.19          | 164.60        | 327.20          | 164.10        | 3     |
| 14 | 1,681.81      | 841.41 | 1,664.78 | 832.90 | 1,663.80 | 832.40        | P   | <b>244.17</b>   | 122.59        | <b>227.14</b>   | 114.07        |                 |               | 2     |
| 15 |               |        |          |        |          |               | K   | <b>147.11</b>   | 74.06         | 130.09          | 65.55         |                 |               | 1     |

MS/MS Fragmentation of **SSSTGSSSSTGGGGQESQPSPLALLAATCSR**

Found in **P08047**, Transcription factor Sp1 - Homo sapiens (Human)

Match to Query 57334: 3094.065from(1032.362,3+)

Title: File: SCX222.wiff, Sample: ICAT (sample number 1), Elution: 41.219 min, Period: 1, Cycle(s): 1638 (Experiment 2)

Data File:Ku-ICAT\_SPROT-RESEARCHED

**Monoisotopic mass of neutral peptide Mr(calc): 3094.065**

**Variable modifications:**

**C29 :ICAT-C (C)**

**Ions Score: 28.21 Expect: 0.220**

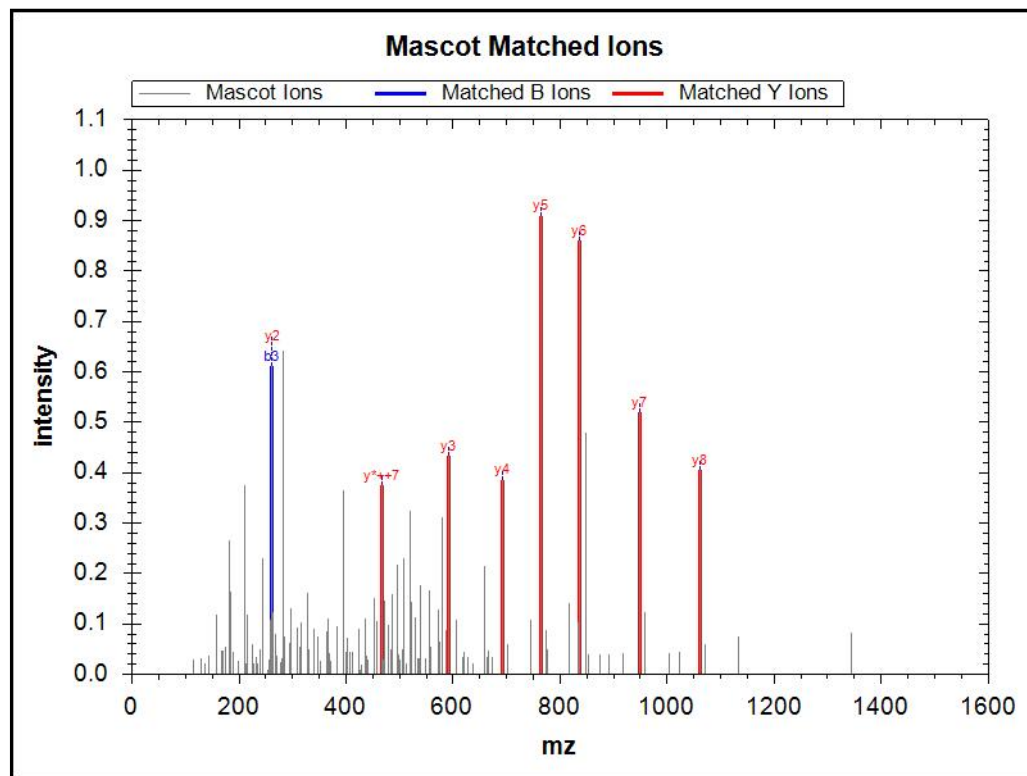

| No | b             | b++      | b*       | b*++     | b0       | b0++     | Seq | y               | y++      | y*       | y*++          | y0       | y0++     | RevNo |
|----|---------------|----------|----------|----------|----------|----------|-----|-----------------|----------|----------|---------------|----------|----------|-------|
| 1  | 88.04         | 44.52    |          |          | 70.03    | 35.52    | S   |                 |          |          |               |          |          | 31    |
| 2  | 175.07        | 88.04    |          |          | 157.06   | 79.03    | S   | 3,008.42        | 1,504.71 | 2,991.40 | 1,496.20      | 2,990.41 | 1,495.71 | 30    |
| 3  | <b>262.10</b> | 131.56   |          |          | 244.09   | 122.55   | S   | 2,921.39        | 1,461.20 | 2,904.36 | 1,452.69      | 2,903.38 | 1,452.19 | 29    |
| 4  | 363.15        | 182.08   |          |          | 345.14   | 173.07   | T   | 2,834.36        | 1,417.68 | 2,817.33 | 1,409.17      | 2,816.35 | 1,408.68 | 28    |
| 5  | 420.17        | 210.59   |          |          | 402.16   | 201.58   | G   | 2,733.31        | 1,367.16 | 2,716.28 | 1,358.65      | 2,715.30 | 1,358.15 | 27    |
| 6  | 507.20        | 254.11   |          |          | 489.19   | 245.10   | S   | 2,676.29        | 1,338.65 | 2,659.26 | 1,330.13      | 2,658.28 | 1,329.64 | 26    |
| 7  | 594.24        | 297.62   |          |          | 576.23   | 288.62   | S   | 2,589.26        | 1,295.13 | 2,572.23 | 1,286.62      | 2,571.25 | 1,286.13 | 25    |
| 8  | 681.27        | 341.14   |          |          | 663.26   | 332.13   | S   | 2,502.23        | 1,251.62 | 2,485.20 | 1,243.10      | 2,484.21 | 1,242.61 | 24    |
| 9  | 768.30        | 384.65   |          |          | 750.29   | 375.65   | S   | 2,415.19        | 1,208.10 | 2,398.17 | 1,199.59      | 2,397.18 | 1,199.09 | 23    |
| 10 | 869.35        | 435.18   |          |          | 851.34   | 426.17   | T   | 2,328.16        | 1,164.58 | 2,311.13 | 1,156.07      | 2,310.15 | 1,155.58 | 22    |
| 11 | 926.37        | 463.69   |          |          | 908.36   | 454.68   | G   | 2,227.11        | 1,114.06 | 2,210.09 | 1,105.55      | 2,209.10 | 1,105.06 | 21    |
| 12 | 983.39        | 492.20   |          |          | 965.38   | 483.19   | G   | 2,170.09        | 1,085.55 | 2,153.07 | 1,077.04      | 2,152.08 | 1,076.54 | 20    |
| 13 | 1,040.41      | 520.71   |          |          | 1,022.40 | 511.70   | G   | 2,113.07        | 1,057.04 | 2,096.04 | 1,048.53      | 2,095.06 | 1,048.03 | 19    |
| 14 | 1,097.43      | 549.22   |          |          | 1,079.42 | 540.22   | G   | 2,056.05        | 1,028.53 | 2,039.02 | 1,020.01      | 2,038.04 | 1,019.52 | 18    |
| 15 | 1,225.49      | 613.25   | 1,208.47 | 604.74   | 1,207.48 | 604.24   | Q   | 1,999.03        | 1,000.02 | 1,982.00 | 991.50        | 1,981.02 | 991.01   | 17    |
| 16 | 1,354.54      | 677.77   | 1,337.51 | 669.26   | 1,336.52 | 668.77   | E   | 1,870.97        | 935.99   | 1,853.94 | 927.47        | 1,852.96 | 926.98   | 16    |
| 17 | 1,441.57      | 721.29   | 1,424.54 | 712.77   | 1,423.56 | 712.28   | S   | 1,741.93        | 871.47   | 1,724.90 | 862.95        | 1,723.92 | 862.46   | 15    |
| 18 | 1,569.63      | 785.32   | 1,552.60 | 776.80   | 1,551.62 | 776.31   | Q   | 1,654.89        | 827.95   | 1,637.87 | 819.44        | 1,636.88 | 818.95   | 14    |
| 19 | 1,666.68      | 833.84   | 1,649.65 | 825.33   | 1,648.67 | 824.84   | P   | 1,526.84        | 763.92   | 1,509.81 | 755.41        | 1,508.83 | 754.92   | 13    |
| 20 | 1,753.71      | 877.36   | 1,736.68 | 868.85   | 1,735.70 | 868.35   | S   | 1,429.78        | 715.40   | 1,412.76 | 706.88        | 1,411.77 | 706.39   | 12    |
| 21 | 1,850.76      | 925.89   | 1,833.74 | 917.37   | 1,832.75 | 916.88   | P   | 1,342.75        | 671.88   | 1,325.72 | 663.37        | 1,324.74 | 662.87   | 11    |
| 22 | 1,963.85      | 982.43   | 1,946.82 | 973.91   | 1,945.84 | 973.42   | L   | 1,245.70        | 623.35   | 1,228.67 | 614.84        | 1,227.69 | 614.35   | 10    |
| 23 | 2,034.88      | 1,017.95 | 2,017.86 | 1,009.43 | 2,016.87 | 1,008.94 | A   | 1,132.61        | 566.81   | 1,115.59 | 558.30        | 1,114.60 | 557.81   | 9     |
| 24 | 2,147.97      | 1,074.49 | 2,130.94 | 1,065.97 | 2,129.96 | 1,065.48 | L   | <b>1,061.58</b> | 531.29   | 1,044.55 | 522.78        | 1,043.57 | 522.29   | 8     |
| 25 | 2,261.05      | 1,131.03 | 2,244.03 | 1,122.52 | 2,243.04 | 1,122.02 | L   | <b>948.49</b>   | 474.75   | 931.47   | <b>466.24</b> | 930.48   | 465.74   | 7     |
| 26 | 2,332.09      | 1,166.55 | 2,315.06 | 1,158.04 | 2,314.08 | 1,157.54 | A   | <b>835.41</b>   | 418.21   | 818.38   | 409.69        | 817.40   | 409.20   | 6     |
| 27 | 2,403.13      | 1,202.07 | 2,386.10 | 1,193.55 | 2,385.12 | 1,193.06 | A   | <b>764.37</b>   | 382.69   | 747.35   | 374.18        | 746.36   | 373.68   | 5     |
| 28 | 2,504.17      | 1,252.59 | 2,487.15 | 1,244.08 | 2,486.16 | 1,243.59 | T   | <b>693.33</b>   | 347.17   | 676.31   | 338.66        | 675.32   | 338.17   | 4     |
| 29 | 2,834.31      | 1,417.66 | 2,817.28 | 1,409.15 | 2,816.30 | 1,408.65 | C   | <b>592.29</b>   | 296.65   | 575.26   | 288.13        | 574.28   | 287.64   | 3     |
| 30 | 2,921.34      | 1,461.18 | 2,904.32 | 1,452.66 | 2,903.33 | 1,452.17 | S   | <b>262.15</b>   | 131.58   | 245.12   | 123.07        | 244.14   | 122.57   | 2     |
| 31 |               |          |          |          |          |          | R   | 175.12          | 88.06    | 158.09   | 79.55         |          |          | 1     |

MS/MS Fragmentation of **FCLSSQFR**

Found in **P38398**, Breast cancer type 1 susceptibility protein - Homo sapiens (Human)

Match to Query 7078: 1213.476from(607.7452,2+)

Title: File: SCX230.wiff, Sample: ICAT (sample number 1), Elution: 29.058 min, Period: 1, Cycle(s): 1438 (Experiment 2)

Data File:Ku-ICAT\_SPROT-RESEARCHED

**Monoisotopic mass of neutral peptide Mr(calc):** 1213.476

**Variable modifications:**

**C2** :ICAT-C (C)

**Ions Score:** 38.46 **Expect:** 0.011

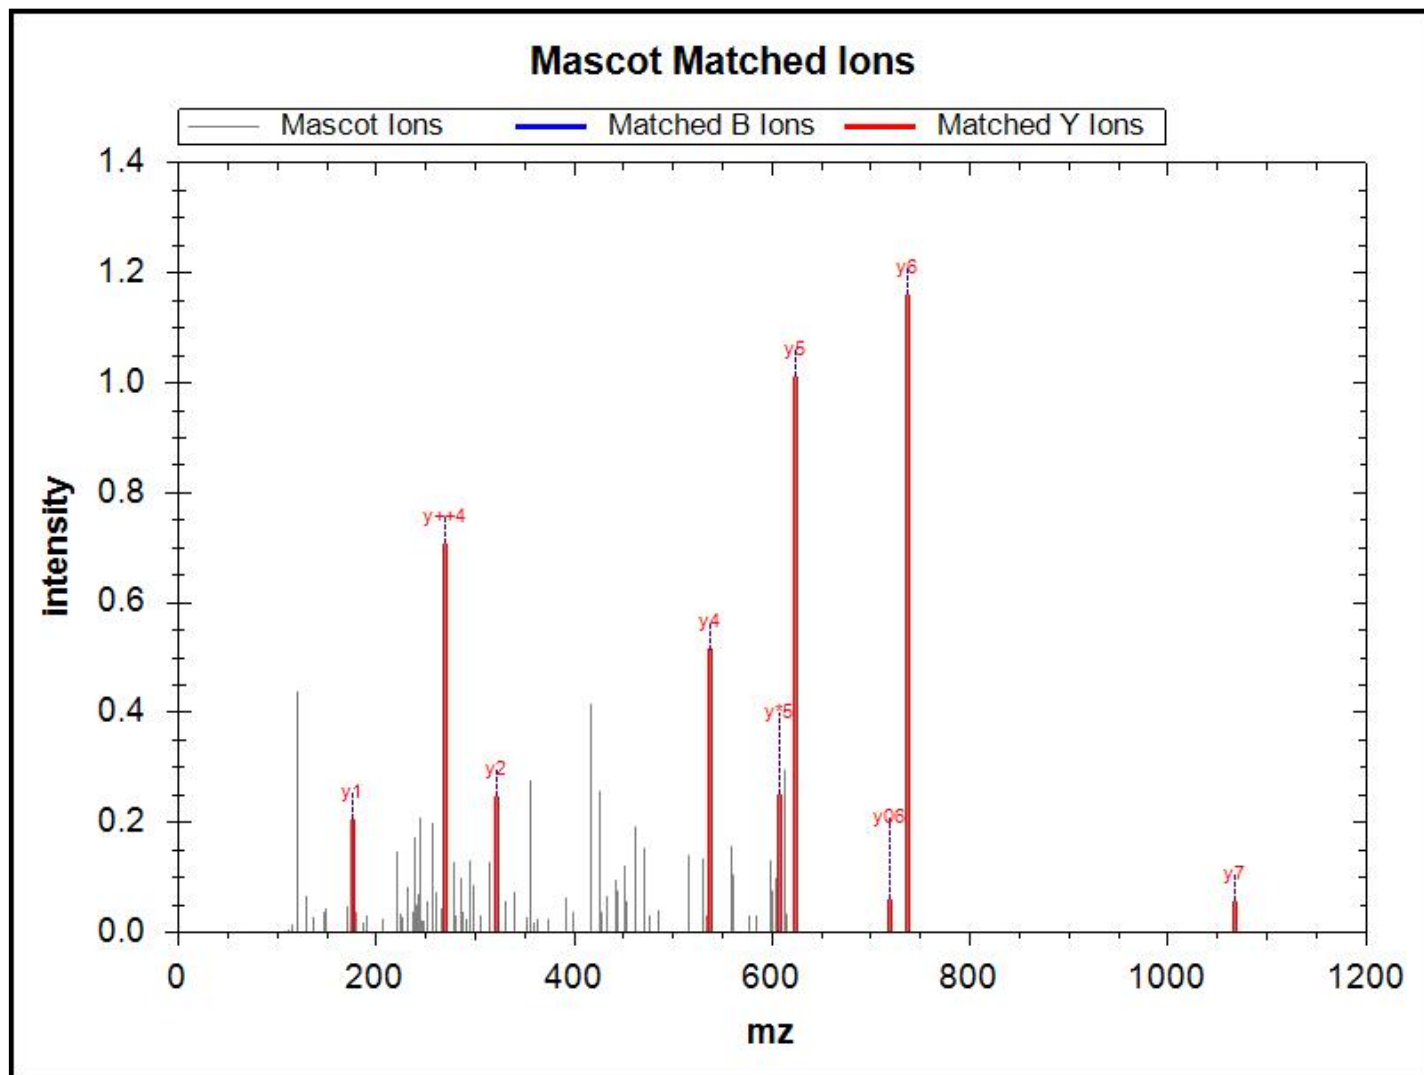

| No | b        | b++    | b*       | b*++   | b0       | b0++   | Seq | y        | y++    | y*       | y*++   | y0       | y0++   | RevNo |
|----|----------|--------|----------|--------|----------|--------|-----|----------|--------|----------|--------|----------|--------|-------|
| 1  | 148.08   | 74.54  |          |        |          |        | F   |          |        |          |        |          |        | 8     |
| 2  | 478.21   | 239.61 |          |        |          |        | C   | 1,067.53 | 534.27 | 1,050.50 | 525.76 | 1,049.52 | 525.26 | 7     |
| 3  | 591.30   | 296.15 |          |        |          |        | L   | 737.39   | 369.20 | 720.37   | 360.69 | 719.38   | 360.20 | 6     |
| 4  | 678.33   | 339.67 |          |        | 660.32   | 330.66 | S   | 624.31   | 312.66 | 607.28   | 304.15 | 606.30   | 303.65 | 5     |
| 5  | 765.36   | 383.18 |          |        | 747.35   | 374.18 | S   | 537.28   | 269.14 | 520.25   | 260.63 | 519.27   | 260.14 | 4     |
| 6  | 893.42   | 447.21 | 876.39   | 438.70 | 875.41   | 438.21 | Q   | 450.25   | 225.63 | 433.22   | 217.11 |          |        | 3     |
| 7  | 1,040.49 | 520.75 | 1,023.46 | 512.23 | 1,022.48 | 511.74 | F   | 322.19   | 161.60 | 305.16   | 153.08 |          |        | 2     |
| 8  |          |        |          |        |          |        | R   | 175.12   | 88.06  | 158.09   | 79.55  |          |        | 1     |

MS/MS Fragmentation of **YHDPNFVPAAFVCSK**

Found in **P49711**, Transcriptional repressor CTCF - Homo sapiens (Human)

Match to Query 31563: 1920.892from(641.3046,3+)

Title: File: SCX243.wiff, Sample: ICAT (sample number 1), Elution: 32.768 min, Period: 1, Cycle(s): 1450 (Experiment 3)

Data File:Ku-ICAT\_SPROT-RESEARCHED

**Monoisotopic mass of neutral peptide Mr(calc): 1920.892**

**Variable modifications:**

**C13 :ICAT-C (C)**

**Ions Score: 25.16 Expect: 0.255**

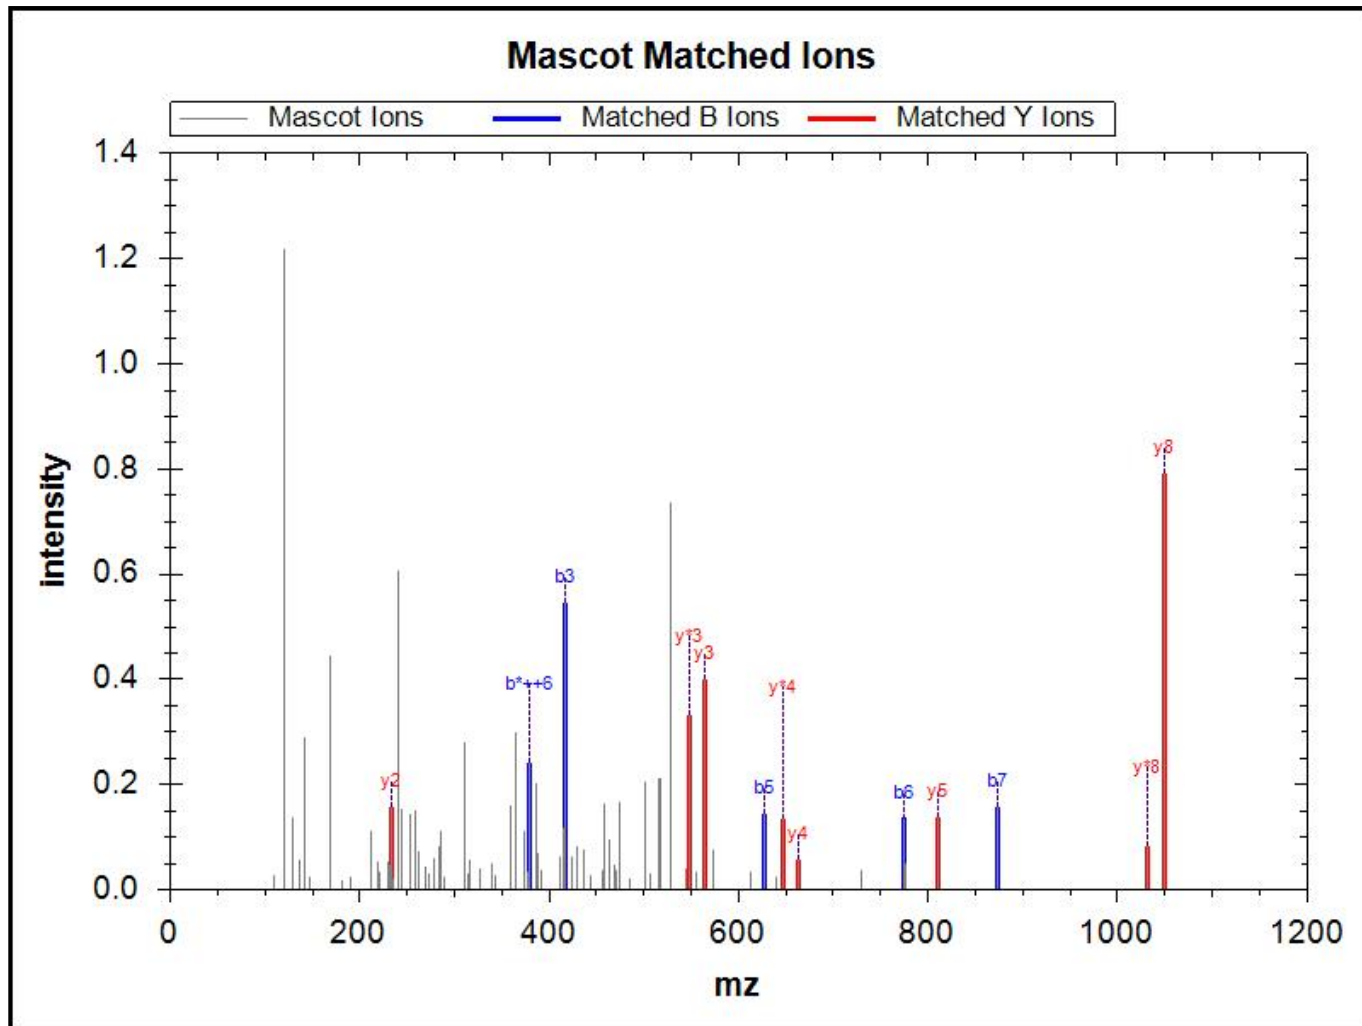

| No | b             | b++    | b*       | b*++          | b0       | b0++   | Seq | y               | y++    | y*              | y*++   | y0       | y0++   | RevNo |
|----|---------------|--------|----------|---------------|----------|--------|-----|-----------------|--------|-----------------|--------|----------|--------|-------|
| 1  | 164.07        | 82.54  |          |               |          |        | Y   |                 |        |                 |        |          |        | 15    |
| 2  | 301.13        | 151.07 |          |               |          |        | H   | 1,758.86        | 879.94 | 1,741.84        | 871.42 | 1,740.85 | 870.93 | 14    |
| 3  | <b>416.16</b> | 208.58 |          |               | 398.15   | 199.58 | D   | 1,621.80        | 811.41 | 1,604.78        | 802.89 | 1,603.79 | 802.40 | 13    |
| 4  | 513.21        | 257.11 |          |               | 495.20   | 248.10 | P   | 1,506.78        | 753.89 | 1,489.75        | 745.38 | 1,488.77 | 744.89 | 12    |
| 5  | <b>627.25</b> | 314.13 | 610.23   | 305.62        | 609.24   | 305.12 | N   | 1,409.72        | 705.37 | 1,392.70        | 696.85 | 1,391.71 | 696.36 | 11    |
| 6  | <b>774.32</b> | 387.66 | 757.29   | <b>379.15</b> | 756.31   | 378.66 | F   | 1,295.68        | 648.34 | 1,278.66        | 639.83 | 1,277.67 | 639.34 | 10    |
| 7  | <b>873.39</b> | 437.20 | 856.36   | 428.68        | 855.38   | 428.19 | V   | 1,148.61        | 574.81 | 1,131.59        | 566.30 | 1,130.60 | 565.80 | 9     |
| 8  | 970.44        | 485.72 | 953.42   | 477.21        | 952.43   | 476.72 | P   | <b>1,049.54</b> | 525.28 | <b>1,032.52</b> | 516.76 | 1,031.53 | 516.27 | 8     |
| 9  | 1,041.48      | 521.24 | 1,024.45 | 512.73        | 1,023.47 | 512.24 | A   | 952.49          | 476.75 | 935.47          | 468.24 | 934.48   | 467.74 | 7     |
| 10 | 1,112.52      | 556.76 | 1,095.49 | 548.25        | 1,094.51 | 547.76 | A   | 881.45          | 441.23 | 864.43          | 432.72 | 863.44   | 432.23 | 6     |
| 11 | 1,259.58      | 630.30 | 1,242.56 | 621.78        | 1,241.57 | 621.29 | F   | <b>810.42</b>   | 405.71 | 793.39          | 397.20 | 792.41   | 396.71 | 5     |
| 12 | 1,358.65      | 679.83 | 1,341.63 | 671.32        | 1,340.64 | 670.82 | V   | <b>663.35</b>   | 332.18 | <b>646.32</b>   | 323.67 | 645.34   | 323.17 | 4     |
| 13 | 1,688.79      | 844.90 | 1,671.76 | 836.38        | 1,670.78 | 835.89 | C   | <b>564.28</b>   | 282.64 | <b>547.25</b>   | 274.13 | 546.27   | 273.64 | 3     |
| 14 | 1,775.82      | 888.41 | 1,758.79 | 879.90        | 1,757.81 | 879.41 | S   | <b>234.14</b>   | 117.58 | 217.12          | 109.06 | 216.13   | 108.57 | 2     |
| 15 |               |        |          |               |          |        | K   | 147.11          | 74.06  | 130.09          | 65.55  |          |        | 1     |

MS/MS Fragmentation of **DVATVAFCD AQSTQEIHEK**

Found in **Q13363**, C-terminal-binding protein 1 - Homo sapiens (Human)

Match to Query 44029: 2327.209from(776.7436,3+)

Title: File: SCX36\_1.wiff, Sample: hung (sample number 1), Elution: 33.812 min, Period: 1, Cycle(s): 1475 (Experiment 3)

Data File:Ku-ICAT\_SPROT-RESEARCHED

**Monoisotopic mass of neutral peptide Mr(calc):** 2327.209

**Variable modifications:**

**C8** :ICAT-C:13C(9) (C)

**Ions Score:** 40.34 **Expect:** 0.008

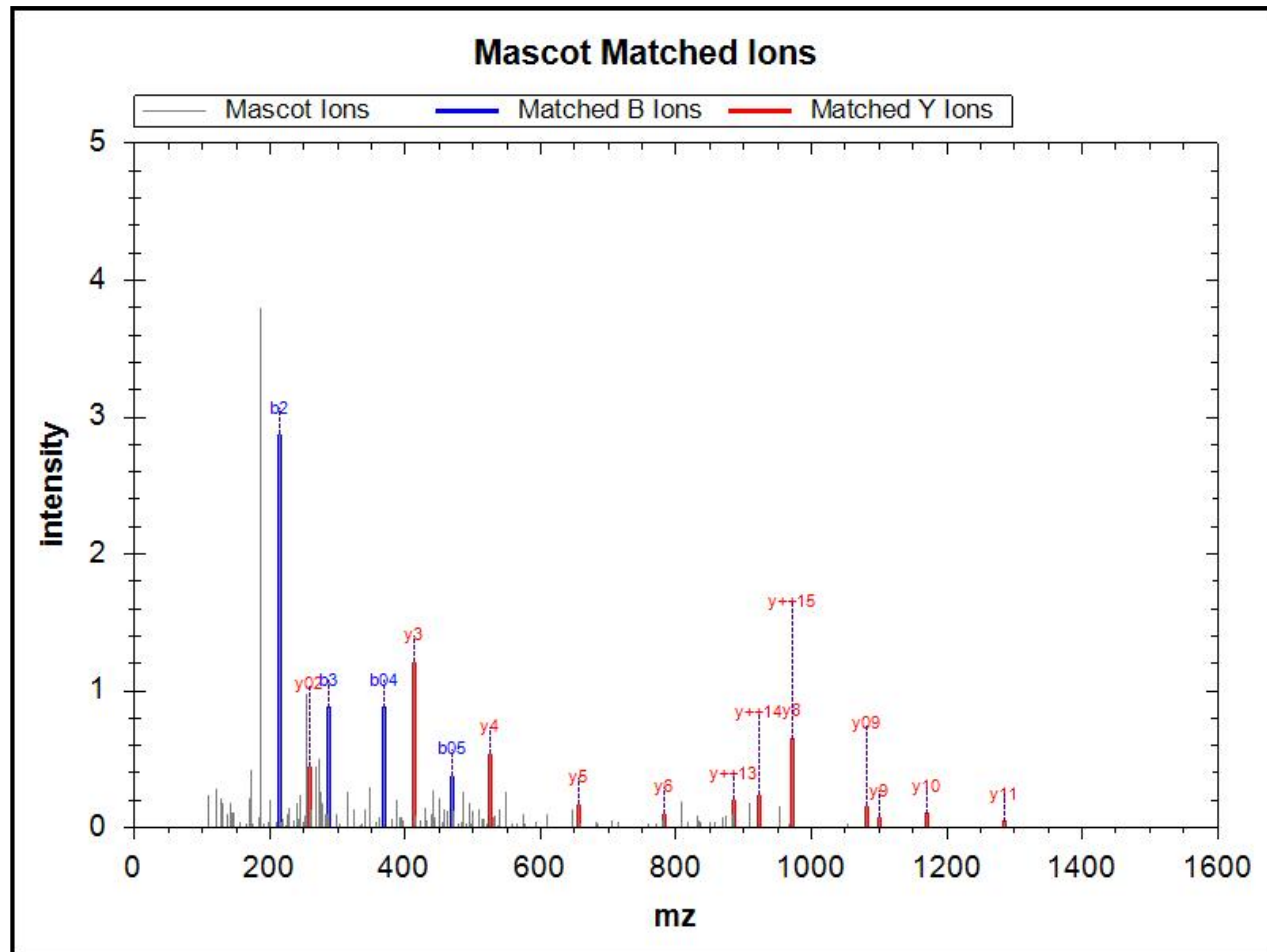

| No | b        | b++      | b*       | b*++     | b0       | b0++     | Seq | y        | y++      | y*       | y*++     | y0       | y0++     | RevNo |
|----|----------|----------|----------|----------|----------|----------|-----|----------|----------|----------|----------|----------|----------|-------|
| 1  | 116.03   | 58.52    |          |          | 98.02    | 49.52    | D   |          |          |          |          |          |          | 19    |
| 2  | 215.10   | 108.05   |          |          | 197.09   | 99.05    | V   | 2,213.10 | 1,107.05 | 2,196.07 | 1,098.54 | 2,195.08 | 1,098.05 | 18    |
| 3  | 286.14   | 143.57   |          |          | 268.13   | 134.57   | A   | 2,114.03 | 1,057.52 | 2,097.00 | 1,049.00 | 2,096.02 | 1,048.51 | 17    |
| 4  | 387.19   | 194.10   |          |          | 369.18   | 185.09   | T   | 2,042.99 | 1,022.00 | 2,025.96 | 1,013.49 | 2,024.98 | 1,012.99 | 16    |
| 5  | 486.26   | 243.63   |          |          | 468.25   | 234.63   | V   | 1,941.94 | 971.47   | 1,924.92 | 962.96   | 1,923.93 | 962.47   | 15    |
| 6  | 557.29   | 279.15   |          |          | 539.28   | 270.14   | A   | 1,842.87 | 921.94   | 1,825.85 | 913.43   | 1,824.86 | 912.94   | 14    |
| 7  | 704.36   | 352.68   |          |          | 686.35   | 343.68   | F   | 1,771.84 | 886.42   | 1,754.81 | 877.91   | 1,753.83 | 877.42   | 13    |
| 8  | 1,043.53 | 522.27   |          |          | 1,025.52 | 513.26   | C   | 1,624.77 | 812.89   | 1,607.74 | 804.37   | 1,606.76 | 803.88   | 12    |
| 9  | 1,158.55 | 579.78   |          |          | 1,140.54 | 570.78   | D   | 1,285.60 | 643.30   | 1,268.58 | 634.79   | 1,267.59 | 634.30   | 11    |
| 10 | 1,229.59 | 615.30   |          |          | 1,211.58 | 606.29   | A   | 1,170.57 | 585.79   | 1,153.55 | 577.28   | 1,152.56 | 576.79   | 10    |
| 11 | 1,357.65 | 679.33   | 1,340.62 | 670.82   | 1,339.64 | 670.32   | Q   | 1,099.54 | 550.27   | 1,082.51 | 541.76   | 1,081.53 | 541.27   | 9     |
| 12 | 1,444.68 | 722.84   | 1,427.66 | 714.33   | 1,426.67 | 713.84   | S   | 971.48   | 486.24   | 954.45   | 477.73   | 953.47   | 477.24   | 8     |
| 13 | 1,545.73 | 773.37   | 1,528.70 | 764.86   | 1,527.72 | 764.36   | T   | 884.45   | 442.73   | 867.42   | 434.21   | 866.44   | 433.72   | 7     |
| 14 | 1,673.79 | 837.40   | 1,656.76 | 828.88   | 1,655.78 | 828.39   | Q   | 783.40   | 392.20   | 766.37   | 383.69   | 765.39   | 383.20   | 6     |
| 15 | 1,802.83 | 901.92   | 1,785.80 | 893.41   | 1,784.82 | 892.91   | E   | 655.34   | 328.17   | 638.31   | 319.66   | 637.33   | 319.17   | 5     |
| 16 | 1,915.92 | 958.46   | 1,898.89 | 949.95   | 1,897.90 | 949.46   | I   | 526.30   | 263.65   | 509.27   | 255.14   | 508.29   | 254.65   | 4     |
| 17 | 2,052.97 | 1,026.99 | 2,035.95 | 1,018.48 | 2,034.96 | 1,017.99 | H   | 413.21   | 207.11   | 396.19   | 198.60   | 395.20   | 198.11   | 3     |
| 18 | 2,182.02 | 1,091.51 | 2,164.99 | 1,083.00 | 2,164.01 | 1,082.51 | E   | 276.16   | 138.58   | 259.13   | 130.07   | 258.14   | 129.58   | 2     |
| 19 |          |          |          |          |          |          | K   | 147.11   | 74.06    | 130.09   | 65.55    |          |          | 1     |

MS/MS Fragmentation of **LKPDDSGVNIAEAAAQNVYCLR**

Found in **Q92547**, DNA topoisomerase 2-binding protein 1 - Homo sapiens (Human)

Match to Query 48917: 2573.303from(858.775,3+)

Title: File: SCX238.wiff, Sample: ICAT (sample number 2), Elution: 40.044 min, Period: 1, Cycle(s): 1569 (Experiment 4)

Data File:Ku-ICAT\_SPROT-RESEARCHED

**Monoisotopic mass of neutral peptide Mr(calc): 2573.303**

**Variable modifications:**

**C20** :ICAT-C (C)

**Ions Score: 39.79 Expect: 0.008**

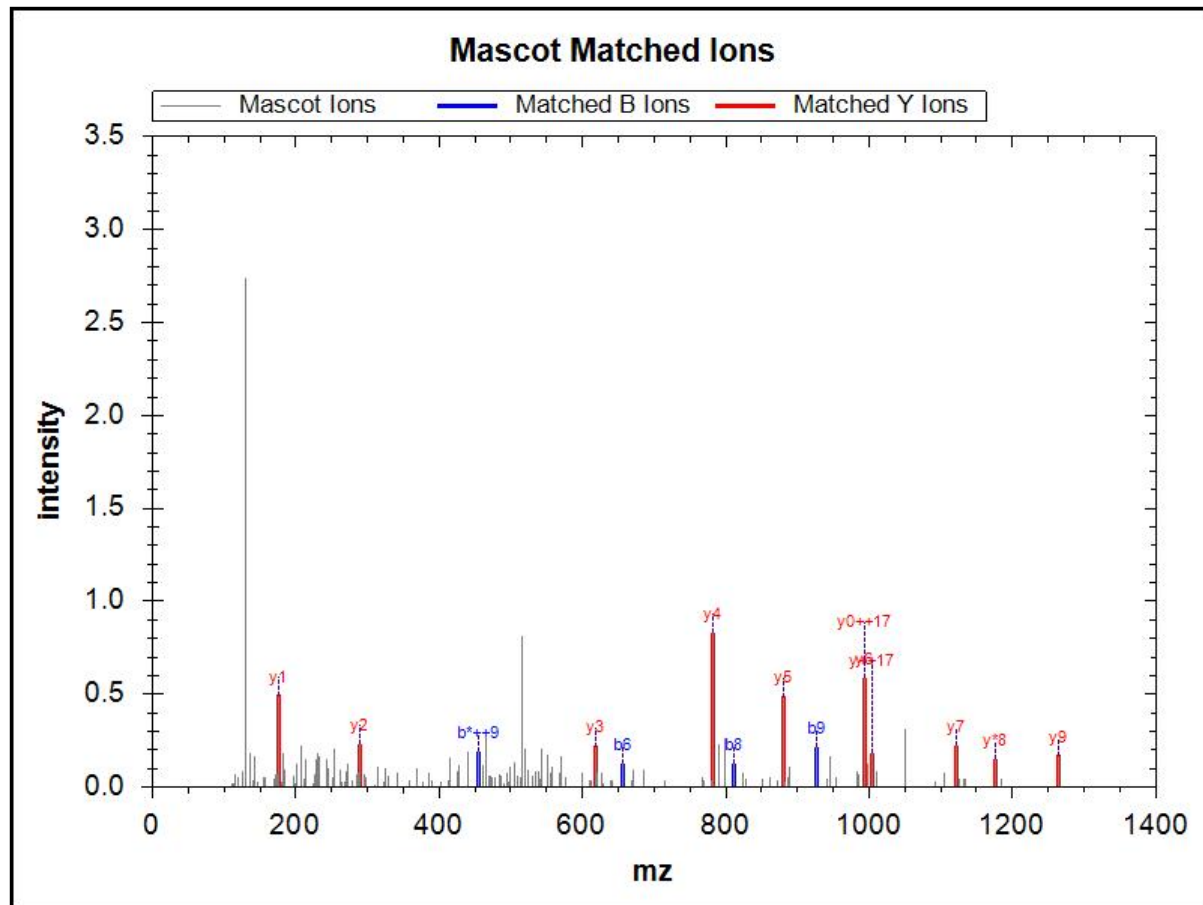

| No | b             | b++      | b*       | b*++          | b0       | b0++     | Seq | y               | y++             | y*              | y*++     | y0       | y0++          | RevNo |
|----|---------------|----------|----------|---------------|----------|----------|-----|-----------------|-----------------|-----------------|----------|----------|---------------|-------|
| 1  | 114.09        | 57.55    |          |               |          |          | L   |                 |                 |                 |          |          |               | 22    |
| 2  | 242.19        | 121.60   | 225.16   | 113.08        |          |          | K   | 2,461.21        | 1,231.11        | 2,444.19        | 1,222.60 | 2,443.20 | 1,222.11      | 21    |
| 3  | 339.24        | 170.12   | 322.21   | 161.61        |          |          | P   | 2,333.12        | 1,167.06        | 2,316.09        | 1,158.55 | 2,315.11 | 1,158.06      | 20    |
| 4  | 454.27        | 227.64   | 437.24   | 219.12        | 436.26   | 218.63   | D   | 2,236.07        | 1,118.54        | 2,219.04        | 1,110.02 | 2,218.06 | 1,109.53      | 19    |
| 5  | 569.29        | 285.15   | 552.27   | 276.64        | 551.28   | 276.14   | D   | 2,121.04        | 1,061.02        | 2,104.01        | 1,052.51 | 2,103.03 | 1,052.02      | 18    |
| 6  | <b>656.32</b> | 328.67   | 639.30   | 320.15        | 638.31   | 319.66   | S   | 2,006.01        | <b>1,003.51</b> | 1,988.99        | 995.00   | 1,988.00 | <b>994.50</b> | 17    |
| 7  | 713.35        | 357.18   | 696.32   | 348.66        | 695.34   | 348.17   | G   | 1,918.98        | 959.99          | 1,901.95        | 951.48   | 1,900.97 | 950.99        | 16    |
| 8  | <b>812.41</b> | 406.71   | 795.39   | 398.20        | 794.40   | 397.71   | V   | 1,861.96        | 931.48          | 1,844.93        | 922.97   | 1,843.95 | 922.48        | 15    |
| 9  | <b>926.46</b> | 463.73   | 909.43   | <b>455.22</b> | 908.45   | 454.73   | N   | 1,762.89        | 881.95          | 1,745.86        | 873.44   | 1,744.88 | 872.94        | 14    |
| 10 | 1,039.54      | 520.27   | 1,022.52 | 511.76        | 1,021.53 | 511.27   | I   | 1,648.85        | 824.93          | 1,631.82        | 816.41   | 1,630.84 | 815.92        | 13    |
| 11 | 1,110.58      | 555.79   | 1,093.55 | 547.28        | 1,092.57 | 546.79   | A   | 1,535.76        | 768.39          | 1,518.74        | 759.87   | 1,517.75 | 759.38        | 12    |
| 12 | 1,239.62      | 620.31   | 1,222.60 | 611.80        | 1,221.61 | 611.31   | E   | 1,464.73        | 732.87          | 1,447.70        | 724.35   | 1,446.72 | 723.86        | 11    |
| 13 | 1,310.66      | 655.83   | 1,293.63 | 647.32        | 1,292.65 | 646.83   | A   | 1,335.68        | 668.35          | 1,318.66        | 659.83   |          |               | 10    |
| 14 | 1,381.70      | 691.35   | 1,364.67 | 682.84        | 1,363.69 | 682.35   | A   | <b>1,264.65</b> | 632.83          | 1,247.62        | 624.31   |          |               | 9     |
| 15 | 1,452.73      | 726.87   | 1,435.71 | 718.36        | 1,434.72 | 717.86   | A   | 1,193.61        | 597.31          | <b>1,176.58</b> | 588.80   |          |               | 8     |
| 16 | 1,580.79      | 790.90   | 1,563.77 | 782.39        | 1,562.78 | 781.89   | Q   | <b>1,122.57</b> | 561.79          | 1,105.55        | 553.28   |          |               | 7     |
| 17 | 1,694.83      | 847.92   | 1,677.81 | 839.41        | 1,676.82 | 838.92   | N   | <b>994.51</b>   | 497.76          | 977.49          | 489.25   |          |               | 6     |
| 18 | 1,793.90      | 897.46   | 1,776.88 | 888.94        | 1,775.89 | 888.45   | V   | <b>880.47</b>   | 440.74          | 863.44          | 432.23   |          |               | 5     |
| 19 | 1,956.97      | 978.99   | 1,939.94 | 970.47        | 1,938.96 | 969.98   | Y   | <b>781.40</b>   | 391.20          | 764.38          | 382.69   |          |               | 4     |
| 20 | 2,287.10      | 1,144.05 | 2,270.08 | 1,135.54      | 2,269.09 | 1,135.05 | C   | <b>618.34</b>   | 309.67          | 601.31          | 301.16   |          |               | 3     |
| 21 | 2,400.19      | 1,200.60 | 2,383.16 | 1,192.08      | 2,382.18 | 1,191.59 | L   | <b>288.20</b>   | 144.61          | 271.18          | 136.09   |          |               | 2     |
| 22 |               |          |          |               |          |          | R   | <b>175.12</b>   | 88.06           | 158.09          | 79.55    |          |               | 1     |

MS/MS Fragmentation of **RPPSAFFLFCSEHRPK**Found in **P26583**, High mobility group protein B2 - Homo sapiens (Human)

Match to Query 39557: 2145.099from(537.2822,4+)

Title: File: SCX25859.wiff, Sample: ICAT (sample number 1), Elution: 28.769 min, Period: 1, Cycle(s): 1222 (Experiment 2)

Data File:Ku-ICAT\_SPROT-RESEARCHED

**Monoisotopic mass of neutral peptide Mr(calc):** 2145.099**Variable modifications:****C10** :ICAT-C (C)**Ions Score:** 28.58 **Expect:** 0.110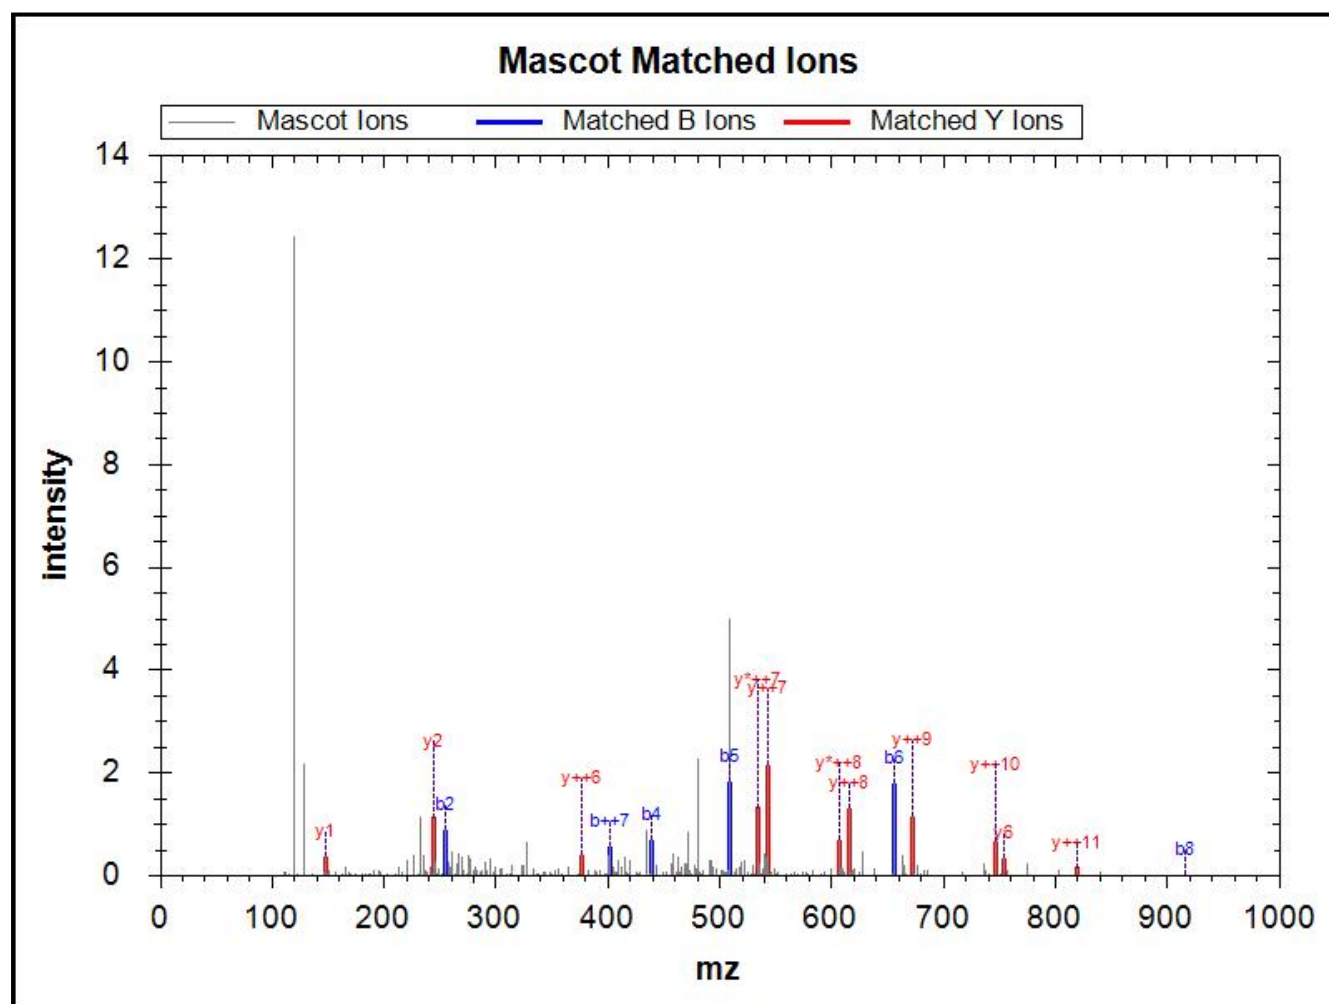

| No | b             | b++           | b*       | b*++   | b0       | b0++   | Seq | y             | y++           | y*       | y*++          | y0       | y0++   | RevNo |
|----|---------------|---------------|----------|--------|----------|--------|-----|---------------|---------------|----------|---------------|----------|--------|-------|
| 1  | 157.11        | 79.06         | 140.08   | 70.54  |          |        | R   |               |               |          |               |          |        | 16    |
| 2  | <b>254.16</b> | 127.58        | 237.13   | 119.07 |          |        | P   | 1,990.00      | 995.50        | 1,972.97 | 986.99        | 1,971.99 | 986.50 | 15    |
| 3  | 351.21        | 176.11        | 334.19   | 167.60 |          |        | P   | 1,892.95      | 946.98        | 1,875.92 | 938.46        | 1,874.94 | 937.97 | 14    |
| 4  | <b>438.25</b> | 219.63        | 421.22   | 211.11 | 420.24   | 210.62 | S   | 1,795.89      | 898.45        | 1,778.87 | 889.94        | 1,777.88 | 889.45 | 13    |
| 5  | <b>509.28</b> | 255.15        | 492.26   | 246.63 | 491.27   | 246.14 | A   | 1,708.86      | 854.94        | 1,691.84 | 846.42        | 1,690.85 | 845.93 | 12    |
| 6  | <b>656.35</b> | 328.68        | 639.32   | 320.17 | 638.34   | 319.67 | F   | 1,637.83      | <b>819.42</b> | 1,620.80 | 810.90        | 1,619.82 | 810.41 | 11    |
| 7  | 803.42        | <b>402.21</b> | 786.39   | 393.70 | 785.41   | 393.21 | F   | 1,490.76      | <b>745.88</b> | 1,473.73 | 737.37        | 1,472.75 | 736.88 | 10    |
| 8  | <b>916.50</b> | 458.76        | 899.48   | 450.24 | 898.49   | 449.75 | L   | 1,343.69      | <b>672.35</b> | 1,326.66 | 663.83        | 1,325.68 | 663.34 | 9     |
| 9  | 1,063.57      | 532.29        | 1,046.55 | 523.78 | 1,045.56 | 523.28 | F   | 1,230.60      | <b>615.81</b> | 1,213.58 | <b>607.29</b> | 1,212.59 | 606.80 | 8     |
| 10 | 1,393.71      | 697.36        | 1,376.68 | 688.84 | 1,375.70 | 688.35 | C   | 1,083.54      | <b>542.27</b> | 1,066.51 | <b>533.76</b> | 1,065.53 | 533.27 | 7     |
| 11 | 1,480.74      | 740.87        | 1,463.71 | 732.36 | 1,462.73 | 731.87 | S   | <b>753.40</b> | <b>377.20</b> | 736.37   | 368.69        | 735.39   | 368.20 | 6     |
| 12 | 1,609.78      | 805.40        | 1,592.76 | 796.88 | 1,591.77 | 796.39 | E   | 666.37        | 333.69        | 649.34   | 325.17        | 648.36   | 324.68 | 5     |
| 13 | 1,746.84      | 873.92        | 1,729.82 | 865.41 | 1,728.83 | 864.92 | H   | 537.33        | 269.17        | 520.30   | 260.65        |          |        | 4     |
| 14 | 1,902.94      | 951.98        | 1,885.92 | 943.46 | 1,884.93 | 942.97 | R   | 400.27        | 200.64        | 383.24   | 192.12        |          |        | 3     |
| 15 | 2,000.00      | 1,000.50      | 1,982.97 | 991.99 | 1,981.99 | 991.50 | P   | <b>244.17</b> | 122.59        | 227.14   | 114.07        |          |        | 2     |
| 16 |               |               |          |        |          |        | K   | <b>147.11</b> | 74.06         | 130.09   | 65.55         |          |        | 1     |

MS/MS Fragmentation of **TLADIICEYPDIIHQSSR**

Found in **P56282**, DNA polymerase epsilon subunit 2 - Homo sapiens (Human)

Match to Query 40675: 2187.052from(730.0246,3+)

Title: File: SCX238.wiff, Sample: ICAT (sample number 2), Elution: 34.06 min, Period: 1, Cycle(s): 1512 (Experiment 4)

Data File:Ku-ICAT\_SPROT-RESEARCHED

**Monoisotopic mass of neutral peptide Mr(calc): 2187.052**

**Variable modifications:**

**C7 :ICAT-C (C)**

**Ions Score: 30.38 Expect: 0.077**

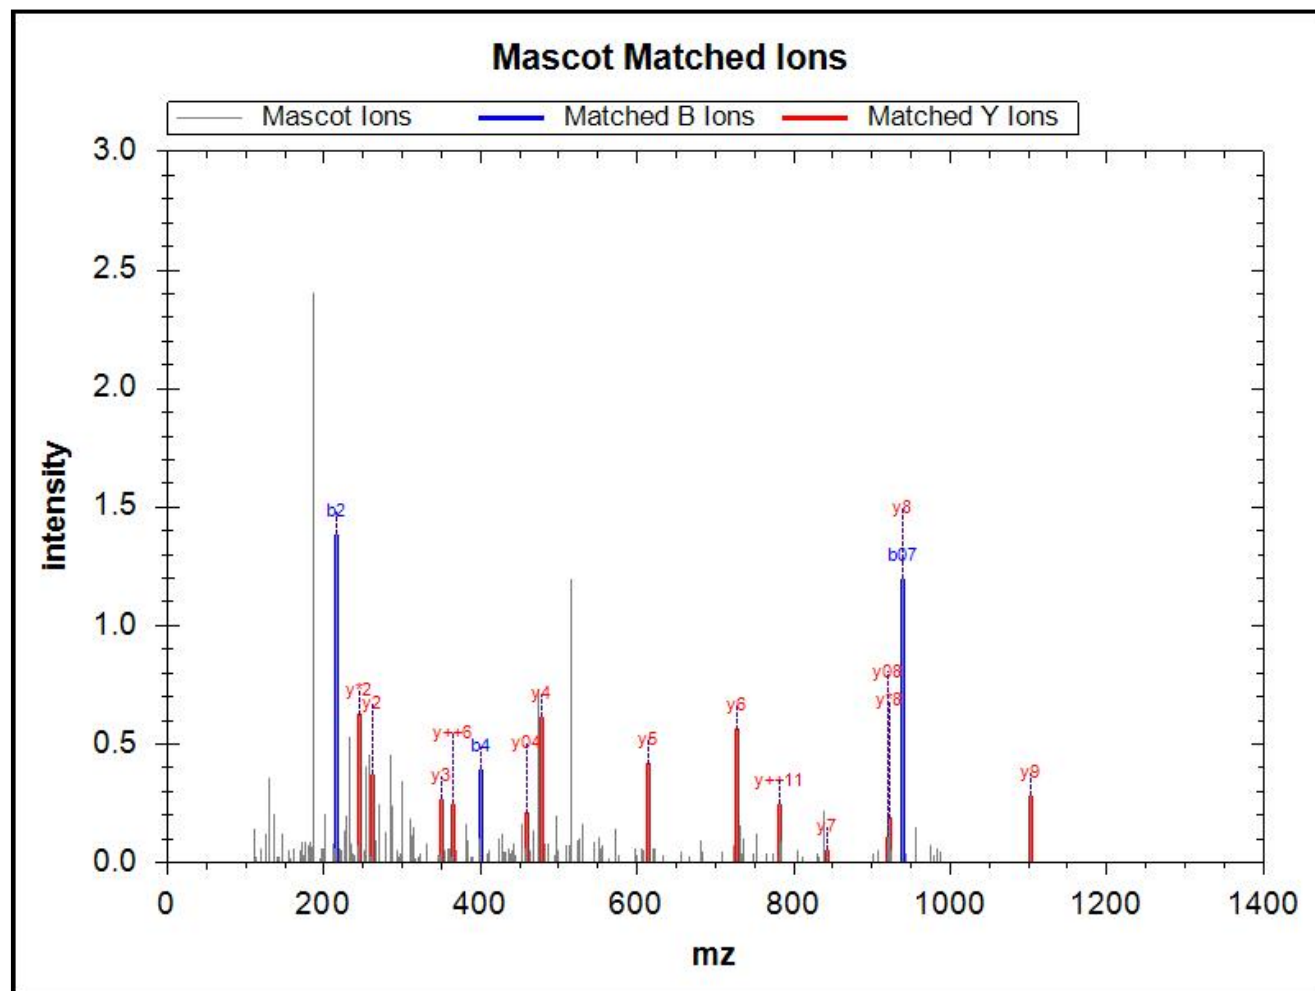

| No | b             | b++      | b*       | b*++   | b0            | b0++   | Seq | y               | y++           | y*            | y*++     | y0            | y0++     | RevNo |
|----|---------------|----------|----------|--------|---------------|--------|-----|-----------------|---------------|---------------|----------|---------------|----------|-------|
| 1  | 102.05        | 51.53    |          |        | 84.04         | 42.53  | T   |                 |               |               |          |               |          | 17    |
| 2  | <b>215.14</b> | 108.07   |          |        | 197.13        | 99.07  | L   | 2,087.02        | 1,044.02      | 2,070.00      | 1,035.50 | 2,069.01      | 1,035.01 | 16    |
| 3  | 286.18        | 143.59   |          |        | 268.17        | 134.59 | A   | 1,973.94        | 987.47        | 1,956.91      | 978.96   | 1,955.93      | 978.47   | 15    |
| 4  | <b>401.20</b> | 201.11   |          |        | 383.19        | 192.10 | D   | 1,902.90        | 951.95        | 1,885.88      | 943.44   | 1,884.89      | 942.95   | 14    |
| 5  | 514.29        | 257.65   |          |        | 496.28        | 248.64 | I   | 1,787.87        | 894.44        | 1,770.85      | 885.93   | 1,769.86      | 885.44   | 13    |
| 6  | 627.37        | 314.19   |          |        | 609.36        | 305.18 | I   | 1,674.79        | 837.90        | 1,657.76      | 829.39   | 1,656.78      | 828.89   | 12    |
| 7  | 957.51        | 479.26   |          |        | <b>939.50</b> | 470.25 | C   | 1,561.71        | <b>781.36</b> | 1,544.68      | 772.84   | 1,543.70      | 772.35   | 11    |
| 8  | 1,086.55      | 543.78   |          |        | 1,068.54      | 534.77 | E   | 1,231.57        | 616.29        | 1,214.54      | 607.78   | 1,213.56      | 607.28   | 10    |
| 9  | 1,249.61      | 625.31   |          |        | 1,231.60      | 616.30 | Y   | <b>1,102.53</b> | 551.77        | 1,085.50      | 543.25   | 1,084.52      | 542.76   | 9     |
| 10 | 1,346.67      | 673.84   |          |        | 1,328.66      | 664.83 | P   | <b>939.46</b>   | 470.24        | <b>922.44</b> | 461.72   | <b>921.45</b> | 461.23   | 8     |
| 11 | 1,461.69      | 731.35   |          |        | 1,443.68      | 722.34 | D   | <b>842.41</b>   | 421.71        | 825.38        | 413.20   | 824.40        | 412.70   | 7     |
| 12 | 1,574.78      | 787.89   |          |        | 1,556.77      | 778.89 | I   | <b>727.38</b>   | <b>364.20</b> | 710.36        | 355.68   | 709.37        | 355.19   | 6     |
| 13 | 1,711.84      | 856.42   |          |        | 1,693.83      | 847.42 | H   | <b>614.30</b>   | 307.65        | 597.27        | 299.14   | 596.29        | 298.65   | 5     |
| 14 | 1,839.89      | 920.45   | 1,822.87 | 911.94 | 1,821.88      | 911.45 | Q   | <b>477.24</b>   | 239.12        | 460.22        | 230.61   | <b>459.23</b> | 230.12   | 4     |
| 15 | 1,926.93      | 963.97   | 1,909.90 | 955.45 | 1,908.92      | 954.96 | S   | <b>349.18</b>   | 175.10        | 332.16        | 166.58   | 331.17        | 166.09   | 3     |
| 16 | 2,013.96      | 1,007.48 | 1,996.93 | 998.97 | 1,995.95      | 998.48 | S   | <b>262.15</b>   | 131.58        | <b>245.12</b> | 123.07   | 244.14        | 122.57   | 2     |
| 17 |               |          |          |        |               |        | R   | 175.12          | 88.06         | 158.09        | 79.55    |               |          | 1     |



MS/MS Fragmentation of **YKYPNISCELLTSDV SQMNDR**

Found in **Q5H9R7**, SAPS domain family member 3 - Homo sapiens (Human)

Match to Query 51316: 2702.334from(901.7852,3+)

Title: File: SCX40\_1.wiff, Sample: hung (sample number 1), Elution: 61.637 min, Period: 1, Cycle(s): 1550 (Experiment 2)

Data File:Ku-ICAT\_SPROT-RESEARCHED

**Monoisotopic mass of neutral peptide Mr(calc): 2702.334**

**Variable modifications:**

**C8** :ICAT-C (C)

**Ions Score: 39.91 Expect: 0.008**

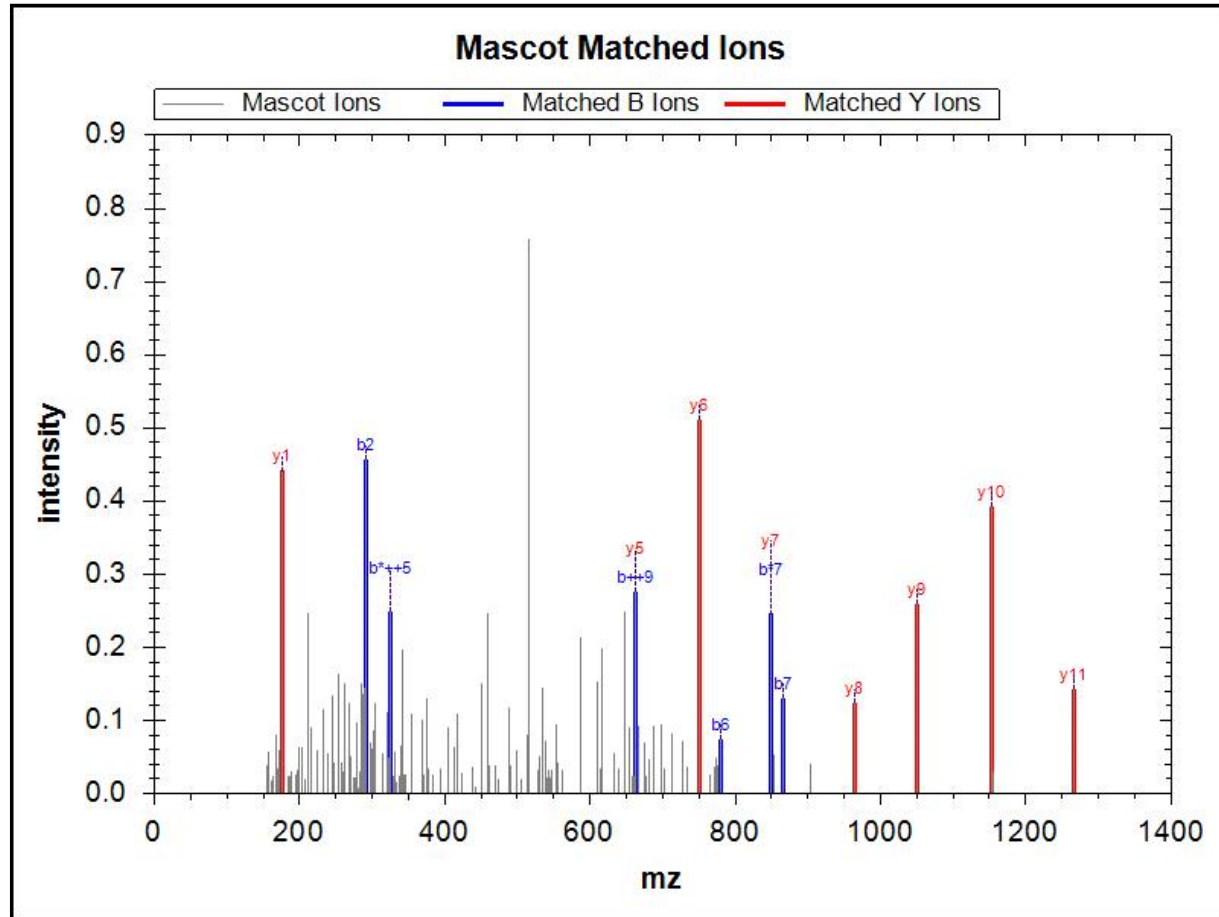

| No | b             | b++           | b*            | b+++          | b0       | b0++     | Seq | y               | y++      | y*       | y*++     | y0       | y0++     | RevNo |
|----|---------------|---------------|---------------|---------------|----------|----------|-----|-----------------|----------|----------|----------|----------|----------|-------|
| 1  | 164.07        | 82.54         |               |               |          |          | Y   |                 |          |          |          |          |          | 21    |
| 2  | <b>292.17</b> | 146.59        | 275.14        | 138.07        |          |          | K   | 2,540.21        | 1,270.61 | 2,523.19 | 1,262.10 | 2,522.20 | 1,261.60 | 20    |
| 3  | 455.23        | 228.12        | 438.20        | 219.60        |          |          | Y   | 2,412.12        | 1,206.56 | 2,395.09 | 1,198.05 | 2,394.11 | 1,197.56 | 19    |
| 4  | 552.28        | 276.64        | 535.26        | 268.13        |          |          | P   | 2,249.05        | 1,125.03 | 2,232.03 | 1,116.52 | 2,231.04 | 1,116.03 | 18    |
| 5  | 666.32        | 333.67        | 649.30        | <b>325.15</b> |          |          | N   | 2,152.00        | 1,076.50 | 2,134.97 | 1,067.99 | 2,133.99 | 1,067.50 | 17    |
| 6  | <b>779.41</b> | 390.21        | 762.38        | 381.69        |          |          | I   | 2,037.96        | 1,019.48 | 2,020.93 | 1,010.97 | 2,019.95 | 1,010.48 | 16    |
| 7  | <b>866.44</b> | 433.72        | <b>849.41</b> | 425.21        | 848.43   | 424.72   | S   | 1,924.87        | 962.94   | 1,907.85 | 954.43   | 1,906.86 | 953.94   | 15    |
| 8  | 1,196.58      | 598.79        | 1,179.55      | 590.28        | 1,178.57 | 589.79   | C   | 1,837.84        | 919.42   | 1,820.82 | 910.91   | 1,819.83 | 910.42   | 14    |
| 9  | 1,325.62      | <b>663.31</b> | 1,308.59      | 654.80        | 1,307.61 | 654.31   | E   | 1,507.71        | 754.36   | 1,490.68 | 745.84   | 1,489.70 | 745.35   | 13    |
| 10 | 1,438.70      | 719.86        | 1,421.68      | 711.34        | 1,420.69 | 710.85   | L   | 1,378.66        | 689.84   | 1,361.64 | 681.32   | 1,360.65 | 680.83   | 12    |
| 11 | 1,551.79      | 776.40        | 1,534.76      | 767.88        | 1,533.78 | 767.39   | L   | <b>1,265.58</b> | 633.29   | 1,248.55 | 624.78   | 1,247.57 | 624.29   | 11    |
| 12 | 1,652.84      | 826.92        | 1,635.81      | 818.41        | 1,634.82 | 817.92   | T   | <b>1,152.49</b> | 576.75   | 1,135.47 | 568.24   | 1,134.48 | 567.75   | 10    |
| 13 | 1,739.87      | 870.44        | 1,722.84      | 861.92        | 1,721.86 | 861.43   | S   | <b>1,051.45</b> | 526.23   | 1,034.42 | 517.71   | 1,033.44 | 517.22   | 9     |
| 14 | 1,854.89      | 927.95        | 1,837.87      | 919.44        | 1,836.88 | 918.95   | D   | <b>964.42</b>   | 482.71   | 947.39   | 474.20   | 946.40   | 473.71   | 8     |
| 15 | 1,953.96      | 977.49        | 1,936.94      | 968.97        | 1,935.95 | 968.48   | V   | <b>849.39</b>   | 425.20   | 832.36   | 416.68   | 831.38   | 416.19   | 7     |
| 16 | 2,040.99      | 1,021.00      | 2,023.97      | 1,012.49      | 2,022.98 | 1,012.00 | S   | <b>750.32</b>   | 375.66   | 733.29   | 367.15   | 732.31   | 366.66   | 6     |
| 17 | 2,169.05      | 1,085.03      | 2,152.03      | 1,076.52      | 2,151.04 | 1,076.03 | Q   | <b>663.29</b>   | 332.15   | 646.26   | 323.63   | 645.28   | 323.14   | 5     |
| 18 | 2,300.09      | 1,150.55      | 2,283.07      | 1,142.04      | 2,282.08 | 1,141.55 | M   | 535.23          | 268.12   | 518.20   | 259.61   | 517.22   | 259.11   | 4     |
| 19 | 2,414.14      | 1,207.57      | 2,397.11      | 1,199.06      | 2,396.13 | 1,198.57 | N   | 404.19          | 202.60   | 387.16   | 194.08   | 386.18   | 193.59   | 3     |
| 20 | 2,529.16      | 1,265.09      | 2,512.14      | 1,256.57      | 2,511.15 | 1,256.08 | D   | 290.15          | 145.58   | 273.12   | 137.06   | 272.14   | 136.57   | 2     |
| 21 |               |               |               |               |          |          | R   | <b>175.12</b>   | 88.06    | 158.09   | 79.55    |          |          | 1     |

MS/MS Fragmentation of **LLETECPQYIR**

Found in **P05109**, Protein S100-A8 - Homo sapiens (Human)

Match to Query 21128: 1590.776from(796.3953,2+)

Title: File: SCX26\_1.wiff, Sample: hung (sample number 1), Elution: 29.297 min, Period: 1, Cycle(s): 1529 (Experiment 2)

Data File:Ku-ICAT\_SPROT-RESEARCHED

**Monoisotopic mass of neutral peptide Mr(calc): 1590.776**

**Variable modifications:**

**C6 :ICAT-C (C)**

**Ions Score: 31.13 Expect: 0.058**

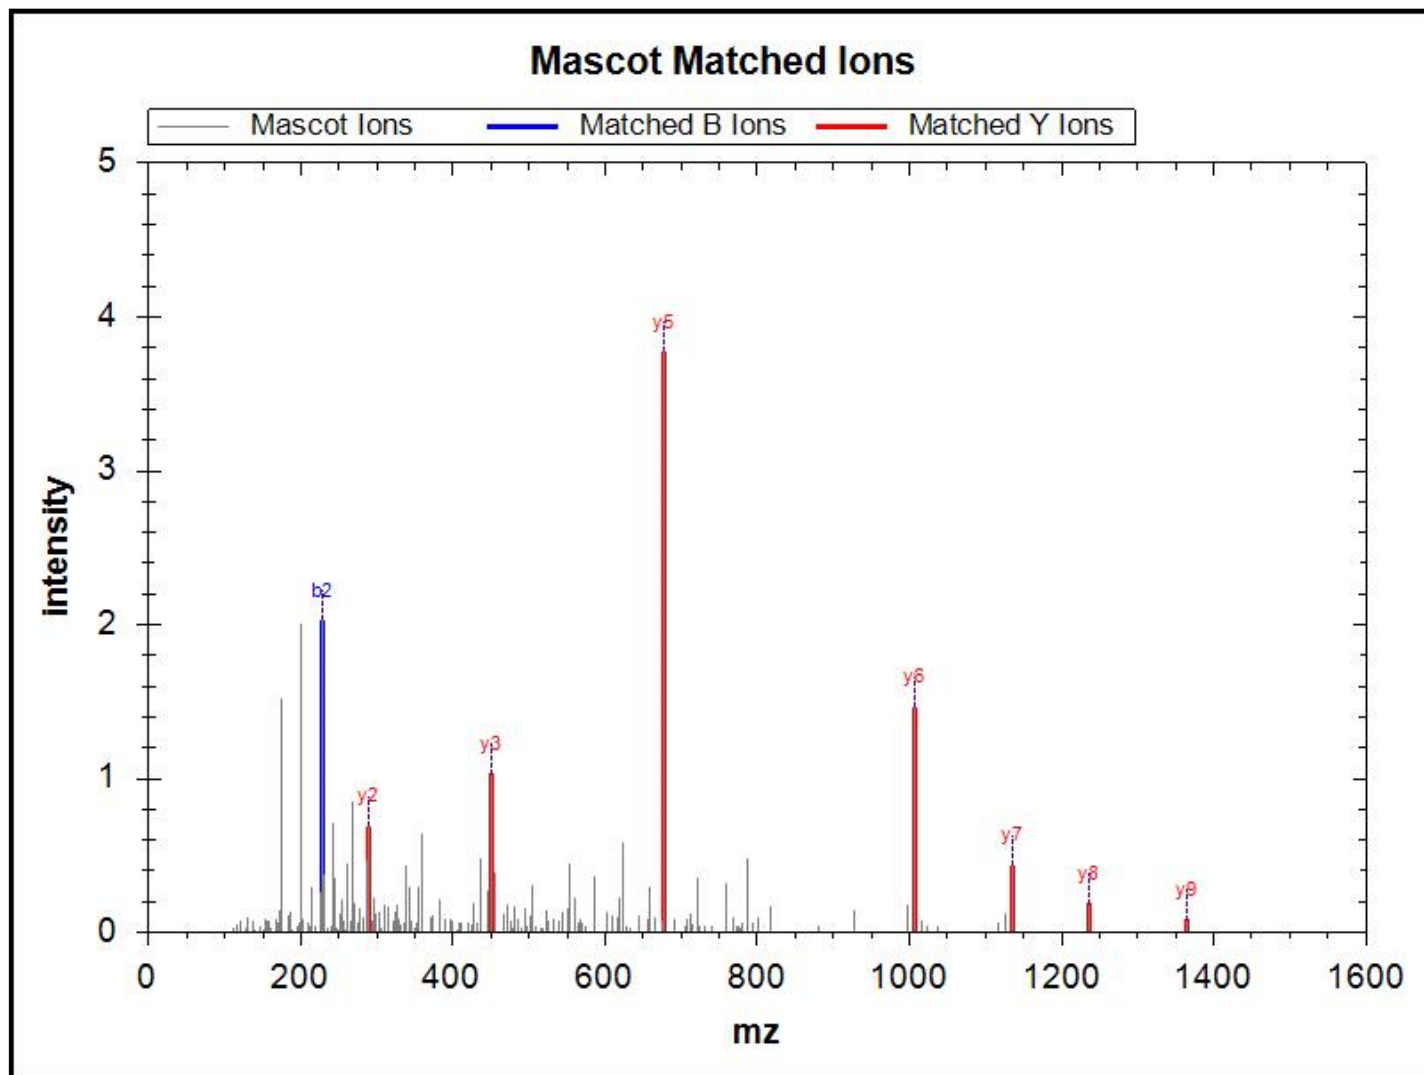

| No | b             | b++    | b*       | b*++   | b0       | b0++   | Seq | y               | y++    | y*       | y*++   | y0       | y0++   | RevNo |
|----|---------------|--------|----------|--------|----------|--------|-----|-----------------|--------|----------|--------|----------|--------|-------|
| 1  | 114.09        | 57.55  |          |        |          |        | L   |                 |        |          |        |          |        | 11    |
| 2  | <b>227.18</b> | 114.09 |          |        |          |        | L   | 1,478.73        | 739.87 | 1,461.70 | 731.36 | 1,460.72 | 730.86 | 10    |
| 3  | 356.22        | 178.61 |          |        | 338.21   | 169.61 | E   | <b>1,365.65</b> | 683.33 | 1,348.62 | 674.81 | 1,347.64 | 674.32 | 9     |
| 4  | 457.27        | 229.14 |          |        | 439.26   | 220.13 | T   | <b>1,236.60</b> | 618.81 | 1,219.58 | 610.29 | 1,218.59 | 609.80 | 8     |
| 5  | 586.31        | 293.66 |          |        | 568.30   | 284.65 | E   | <b>1,135.56</b> | 568.28 | 1,118.53 | 559.77 | 1,117.55 | 559.28 | 7     |
| 6  | 916.44        | 458.73 |          |        | 898.43   | 449.72 | C   | <b>1,006.51</b> | 503.76 | 989.49   | 495.25 |          |        | 6     |
| 7  | 1,013.50      | 507.25 |          |        | 995.49   | 498.25 | P   | <b>676.38</b>   | 338.69 | 659.35   | 330.18 |          |        | 5     |
| 8  | 1,141.56      | 571.28 | 1,124.53 | 562.77 | 1,123.55 | 562.28 | Q   | 579.32          | 290.17 | 562.30   | 281.65 |          |        | 4     |
| 9  | 1,304.62      | 652.81 | 1,287.59 | 644.30 | 1,286.61 | 643.81 | Y   | <b>451.27</b>   | 226.14 | 434.24   | 217.62 |          |        | 3     |
| 10 | 1,417.70      | 709.36 | 1,400.68 | 700.84 | 1,399.69 | 700.35 | I   | <b>288.20</b>   | 144.61 | 271.18   | 136.09 |          |        | 2     |
| 11 |               |        |          |        |          |        | R   | 175.12          | 88.06  | 158.09   | 79.55  |          |        | 1     |

Supplementary Figure 2

Query 33441 Hit 1

MS/MS Fragmentation of **MLFSAVEWAR**

Found in **P24468**, COUP transcription factor 2 - Homo sapiens (Human)

Match to Query 33441: 1352.709from(677.3616,2+)

Title: File: 080430AP4iTRAQ\_31\_01.wiff, Sample: Sample (sample number 1), Elution: 54.982 min, Period: 1, Cycle(s): 1675 (Experiment 4)

Data File:iTRAQ\_080430\_combined Search

**Monoisotopic mass of neutral peptide Mr(calc): 1352.709**

**Variable modifications:**

**Ions Score: 62.75 Expect: 0.000**

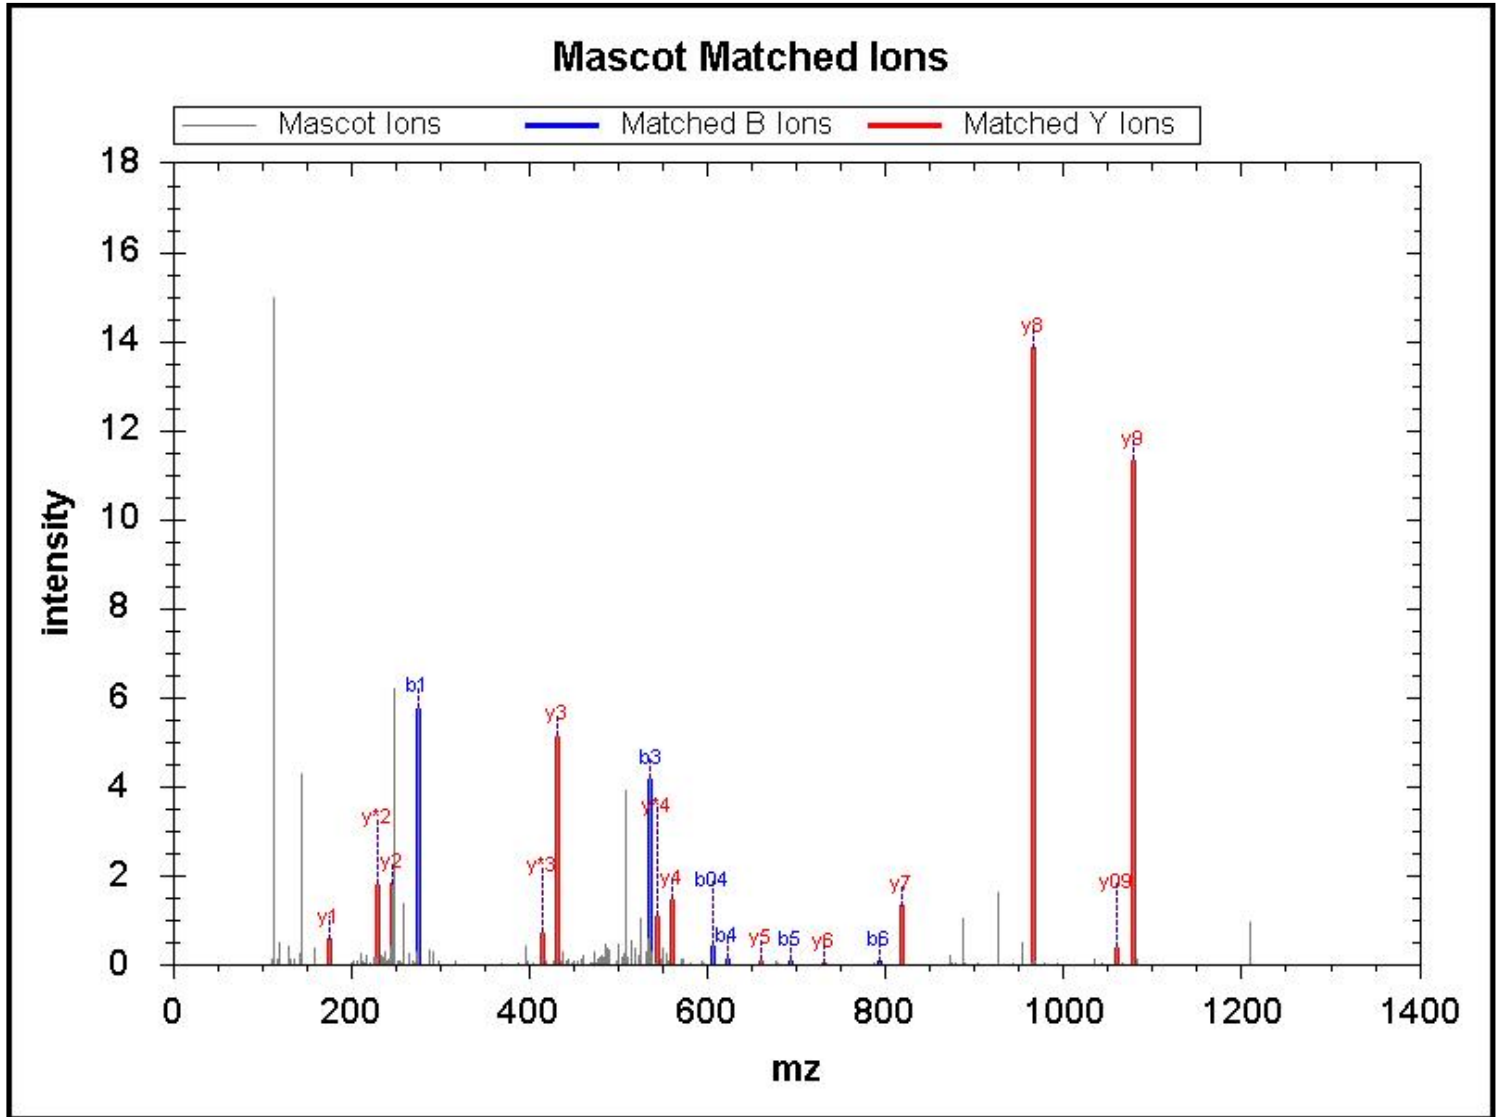

| No | b             | b++    | b0            | b0++   | Seq      | y               | y++    | y*            | y*++   | y0              | y0++   | RevNo     |
|----|---------------|--------|---------------|--------|----------|-----------------|--------|---------------|--------|-----------------|--------|-----------|
| 1  | <b>276.15</b> | 138.58 |               |        | <b>M</b> |                 |        |               |        |                 |        | <b>10</b> |
| 2  | 389.23        | 195.12 |               |        | <b>L</b> | <b>1,078.57</b> | 539.79 | 1,061.54      | 531.27 | <b>1,060.56</b> | 530.78 | <b>9</b>  |
| 3  | <b>536.30</b> | 268.65 |               |        | <b>F</b> | <b>965.48</b>   | 483.25 | 948.46        | 474.73 | 947.47          | 474.24 | <b>8</b>  |
| 4  | <b>623.33</b> | 312.17 | <b>605.32</b> | 303.17 | <b>S</b> | <b>818.42</b>   | 409.71 | 801.39        | 401.20 | 800.40          | 400.71 | <b>7</b>  |
| 5  | <b>694.37</b> | 347.69 | 676.36        | 338.68 | <b>A</b> | <b>731.38</b>   | 366.20 | 714.36        | 357.68 | 713.37          | 357.19 | <b>6</b>  |
| 6  | <b>793.44</b> | 397.22 | 775.43        | 388.22 | <b>V</b> | <b>660.35</b>   | 330.68 | 643.32        | 322.16 | 642.34          | 321.67 | <b>5</b>  |
| 7  | 922.48        | 461.74 | 904.47        | 452.74 | <b>E</b> | <b>561.28</b>   | 281.14 | <b>544.25</b> | 272.63 | 543.27          | 272.14 | <b>4</b>  |
| 8  | 1,108.56      | 554.78 | 1,090.55      | 545.78 | <b>W</b> | <b>432.24</b>   | 216.62 | <b>415.21</b> | 208.11 |                 |        | <b>3</b>  |
| 9  | 1,179.60      | 590.30 | 1,161.59      | 581.30 | <b>A</b> | <b>246.16</b>   | 123.58 | <b>229.13</b> | 115.07 |                 |        | <b>2</b>  |
| 10 |               |        |               |        | <b>R</b> | <b>175.12</b>   | 88.06  | 158.09        | 79.55  |                 |        | <b>1</b>  |

MS/MS Fragmentation of **EALHEALLEYEAGR**Found in **P11474**, Steroid hormone receptor ERR1 - Homo sapiens (Human)

Match to Query 60621: 1743.984from(582.3354,3+)

Title: File: 080430AP4iTRAQ\_40\_02.wiff, Sample: Sample (sample number 1), Elution: 35.332 min, Period: 1, Cycle(s): 1438 (Experiment 4)

Data File:iTRAQ\_080430\_combined Search

**Monoisotopic mass of neutral peptide Mr(calc): 1743.984****Variable modifications:****Ions Score: 49.72 Expect: 0.006**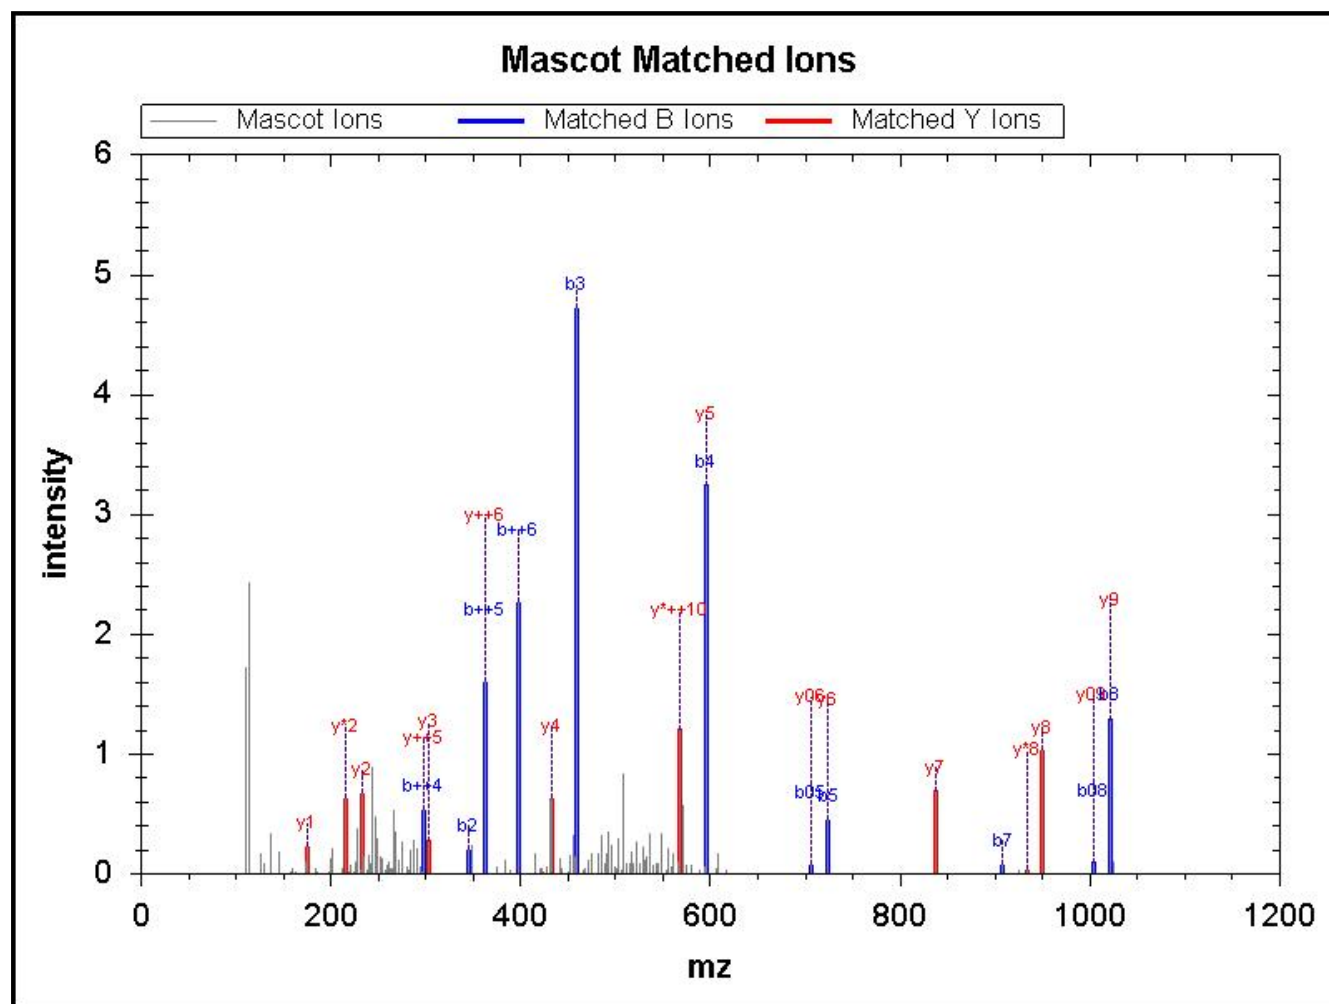

| No | b               | b++           | b0              | b0++   | Seq | y               | y++           | y*            | y*++          | y0              | y0++   | RevNo |
|----|-----------------|---------------|-----------------|--------|-----|-----------------|---------------|---------------|---------------|-----------------|--------|-------|
| 1  | 274.15          | 137.58        | 256.14          | 128.57 | E   |                 |               |               |               |                 |        | 14    |
| 2  | <b>345.19</b>   | 173.10        | 327.18          | 164.09 | A   | 1,471.75        | 736.38        | 1,454.73      | 727.87        | 1,453.74        | 727.38 | 13    |
| 3  | <b>458.27</b>   | 229.64        | 440.26          | 220.63 | L   | 1,400.72        | 700.86        | 1,383.69      | 692.35        | 1,382.71        | 691.86 | 12    |
| 4  | <b>595.33</b>   | <b>298.17</b> | 577.32          | 289.16 | H   | 1,287.63        | 644.32        | 1,270.61      | 635.81        | 1,269.62        | 635.31 | 11    |
| 5  | <b>724.37</b>   | <b>362.69</b> | <b>706.36</b>   | 353.69 | E   | 1,150.57        | 575.79        | 1,133.55      | <b>567.28</b> | 1,132.56        | 566.79 | 10    |
| 6  | 795.41          | <b>398.21</b> | 777.40          | 389.20 | A   | <b>1,021.53</b> | 511.27        | 1,004.50      | 502.76        | <b>1,003.52</b> | 502.26 | 9     |
| 7  | <b>908.50</b>   | 454.75        | 890.49          | 445.75 | L   | <b>950.49</b>   | 475.75        | <b>933.47</b> | 467.24        | 932.48          | 466.75 | 8     |
| 8  | <b>1,021.58</b> | 511.29        | <b>1,003.57</b> | 502.29 | L   | <b>837.41</b>   | 419.21        | 820.38        | 410.70        | 819.40          | 410.20 | 7     |
| 9  | 1,150.62        | 575.81        | 1,132.61        | 566.81 | E   | <b>724.33</b>   | <b>362.67</b> | 707.30        | 354.15        | <b>706.32</b>   | 353.66 | 6     |
| 10 | 1,313.69        | 657.35        | 1,295.68        | 648.34 | Y   | <b>595.28</b>   | <b>298.15</b> | 578.26        | 289.63        | 577.27          | 289.14 | 5     |
| 11 | 1,442.73        | 721.87        | 1,424.72        | 712.86 | E   | <b>432.22</b>   | 216.61        | 415.19        | 208.10        | 414.21          | 207.61 | 4     |
| 12 | 1,513.77        | 757.39        | 1,495.75        | 748.38 | A   | <b>303.18</b>   | 152.09        | 286.15        | 143.58        |                 |        | 3     |
| 13 | 1,570.79        | 785.90        | 1,552.78        | 776.89 | G   | <b>232.14</b>   | 116.57        | <b>215.11</b> | 108.06        |                 |        | 2     |
| 14 |                 |               |                 |        | R   | <b>175.12</b>   | 88.06         | 158.09        | 79.55         |                 |        | 1     |

MS/MS Fragmentation of **KPILLPSWIK**

Found in **Q92547**, DNA topoisomerase 2-binding protein 1 - Homo sapiens (Human)

Match to Query 53520: 1626.046from(543.0226,3+)

Title: File: 080430AP4iTRAQ\_4647\_02.wiff, Sample: Sample (sample number 1), Elution: 51.939 min, Period: 1, Cycle(s): 2084 (Experiment 2)

Data File:iTRAQ\_080430\_combined Search

**Monoisotopic mass of neutral peptide Mr(calc): 1626.046**

**Variable modifications:**

**K1** :iTRAQ4plex (K)

**K10** :iTRAQ4plex (K)

**Ions Score: 40.55 Expect: 0.047**

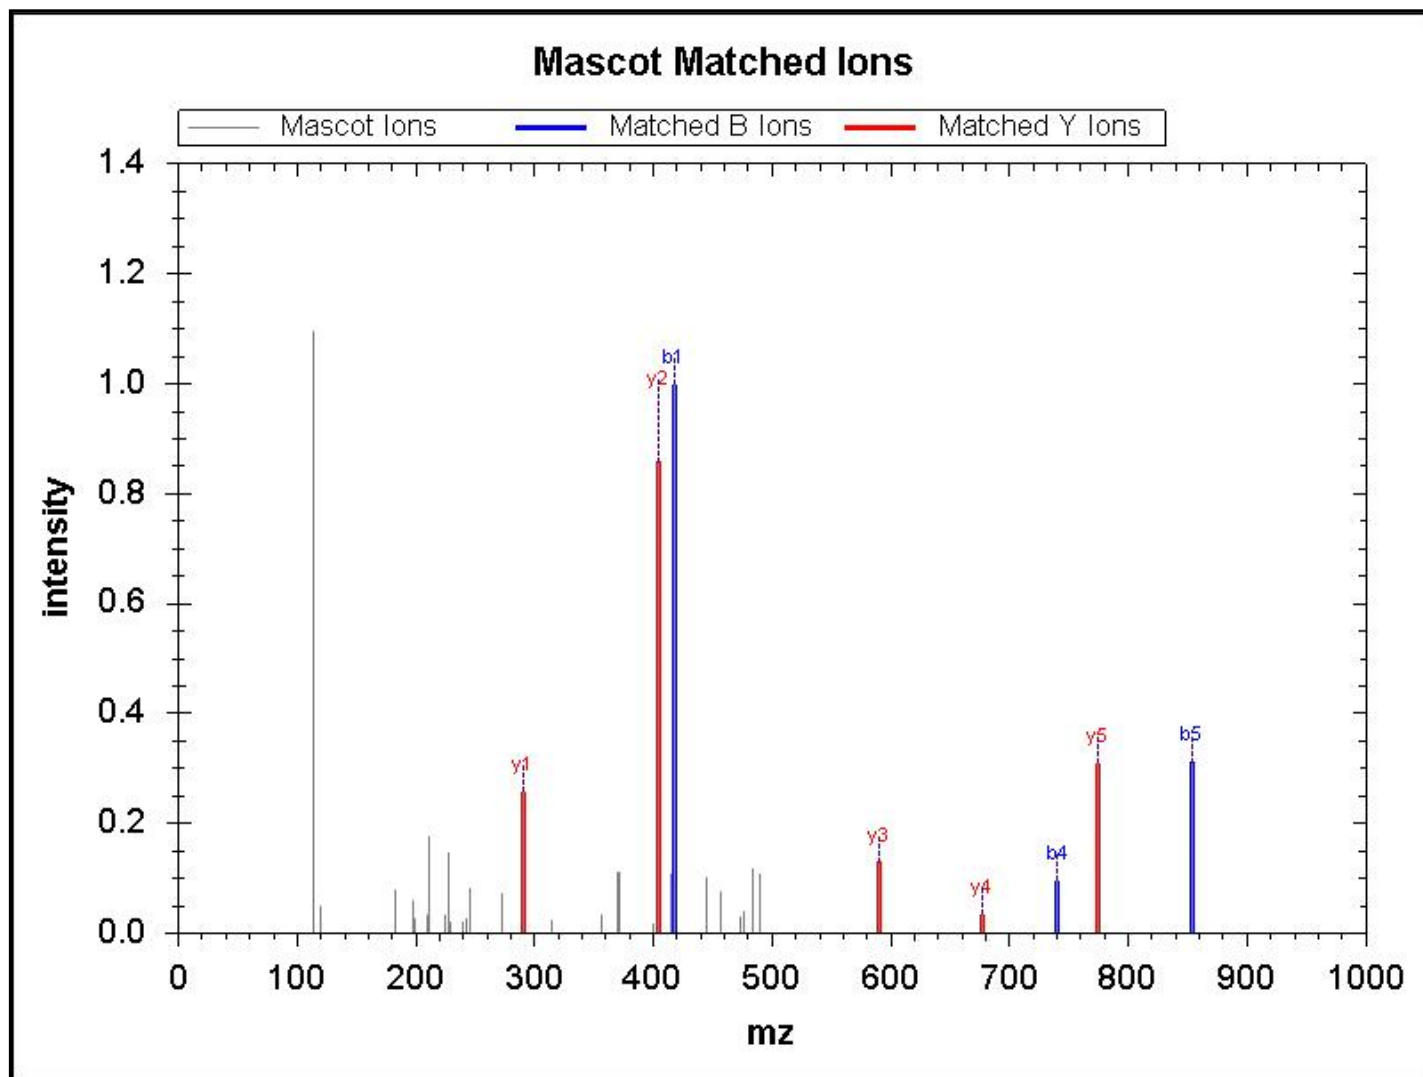

| No | b             | b++    | b*       | b*++   | b0       | b0++   | Seq      | y             | y++    | y*       | y*++   | y0       | y0++   | RevNo     |
|----|---------------|--------|----------|--------|----------|--------|----------|---------------|--------|----------|--------|----------|--------|-----------|
| 1  | <b>417.31</b> | 209.16 | 400.28   | 200.64 |          |        | <b>K</b> |               |        |          |        |          |        | <b>10</b> |
| 2  | 514.36        | 257.68 | 497.33   | 249.17 |          |        | <b>P</b> | 1,210.77      | 605.89 | 1,193.74 | 597.37 | 1,192.76 | 596.88 | <b>9</b>  |
| 3  | 627.44        | 314.23 | 610.42   | 305.71 |          |        | <b>I</b> | 1,113.72      | 557.36 | 1,096.69 | 548.85 | 1,095.70 | 548.36 | <b>8</b>  |
| 4  | <b>740.53</b> | 370.77 | 723.50   | 362.25 |          |        | <b>L</b> | 1,000.63      | 500.82 | 983.60   | 492.31 | 982.62   | 491.81 | <b>7</b>  |
| 5  | <b>853.61</b> | 427.31 | 836.58   | 418.80 |          |        | <b>L</b> | 887.55        | 444.28 | 870.52   | 435.76 | 869.54   | 435.27 | <b>6</b>  |
| 6  | 950.66        | 475.84 | 933.64   | 467.32 |          |        | <b>P</b> | <b>774.46</b> | 387.74 | 757.44   | 379.22 | 756.45   | 378.73 | <b>5</b>  |
| 7  | 1,037.70      | 519.35 | 1,020.67 | 510.84 | 1,019.69 | 510.35 | <b>S</b> | <b>677.41</b> | 339.21 | 660.38   | 330.70 | 659.40   | 330.20 | <b>4</b>  |
| 8  | 1,223.78      | 612.39 | 1,206.75 | 603.88 | 1,205.76 | 603.39 | <b>W</b> | <b>590.38</b> | 295.69 | 573.35   | 287.18 |          |        | <b>3</b>  |
| 9  | 1,336.86      | 668.93 | 1,319.83 | 660.42 | 1,318.85 | 659.93 | <b>I</b> | <b>404.30</b> | 202.65 | 387.27   | 194.14 |          |        | <b>2</b>  |
| 10 |               |        |          |        |          |        | <b>K</b> | <b>291.21</b> | 146.11 | 274.19   | 137.60 |          |        | <b>1</b>  |

MS/MS Fragmentation of **GEHPGLSIGDVAK**

Found in **Q9UGV6**, High mobility group protein 1-like 10 - Homo sapiens (Human)

Match to Query 49776: 1566.908from(523.3099,3+)

Title: File: 080430AP4iTRAQ\_4243\_01.wiff, Sample: Sample (sample number 1), Elution: 33.12 min, Period: 1, Cycle(s): 1940 (Experiment 4)

Data File:iTRAQ\_080430\_combined Search

**Monoisotopic mass of neutral peptide Mr(calc): 1566.908**

**Variable modifications:**

**K13** :iTRAQ4plex (K)

**Ions Score: 47.54 Expect: 0.009**

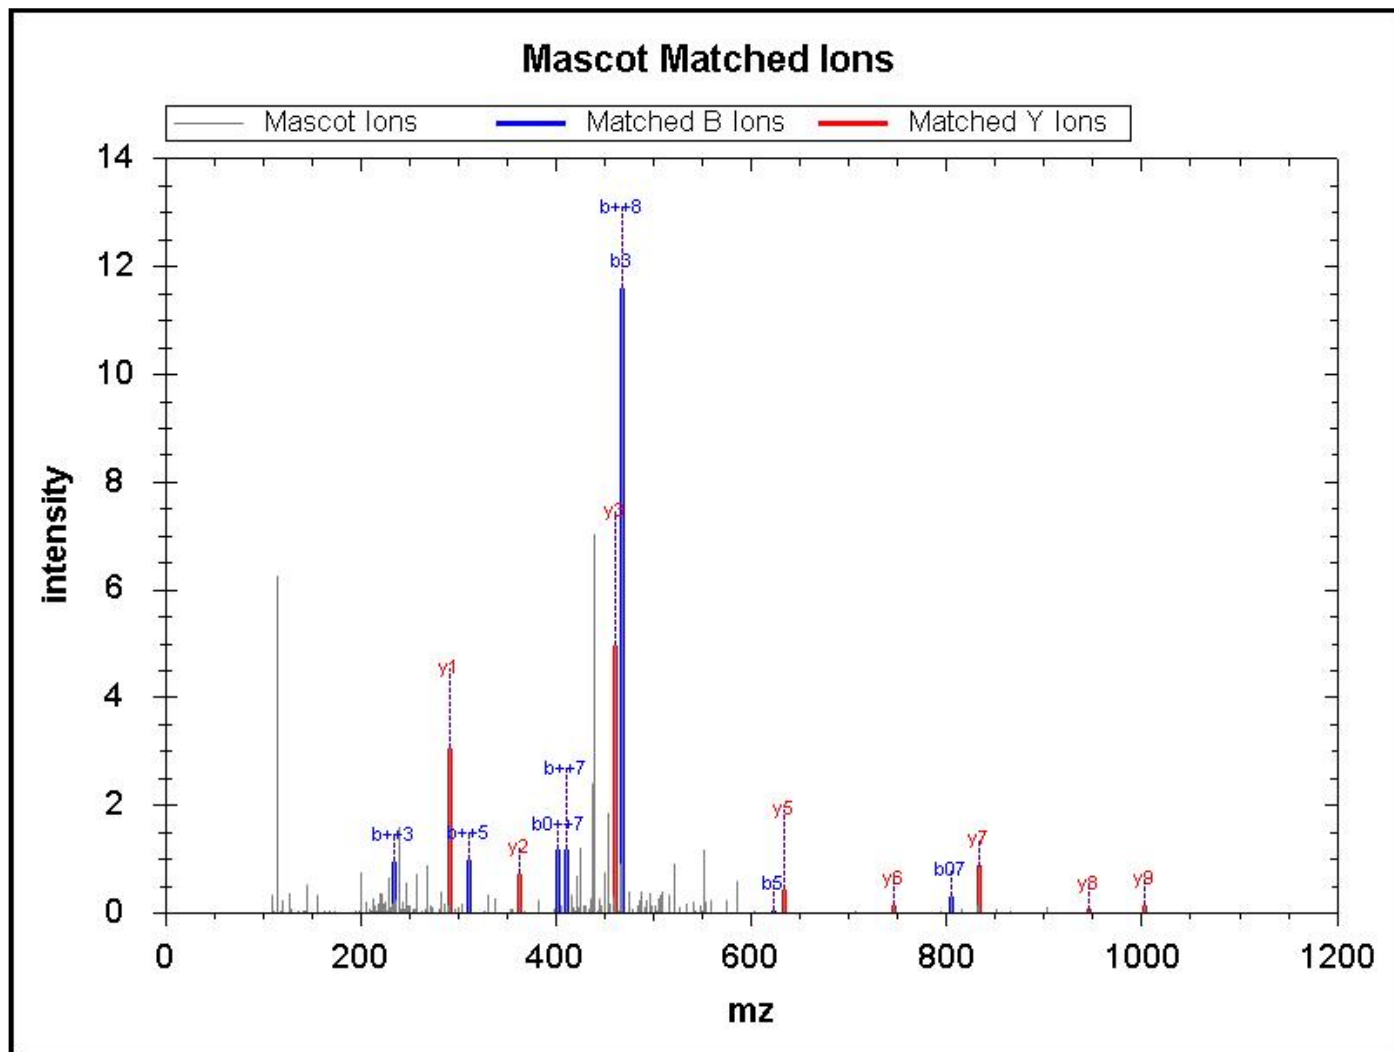

| No | b             | b++           | b0            | b0++          | Seq      | y               | y++    | y*       | y*++   | y0       | y0++   | RevNo     |
|----|---------------|---------------|---------------|---------------|----------|-----------------|--------|----------|--------|----------|--------|-----------|
| 1  | 202.13        | 101.57        |               |               | <b>G</b> |                 |        |          |        |          |        | <b>13</b> |
| 2  | 331.17        | 166.09        | 313.16        | 157.09        | <b>E</b> | 1,366.74        | 683.88 | 1,349.72 | 675.36 | 1,348.73 | 674.87 | <b>12</b> |
| 3  | <b>468.23</b> | <b>234.62</b> | 450.22        | 225.61        | <b>H</b> | 1,237.70        | 619.35 | 1,220.68 | 610.84 | 1,219.69 | 610.35 | <b>11</b> |
| 4  | 565.29        | 283.15        | 547.27        | 274.14        | <b>P</b> | 1,100.64        | 550.83 | 1,083.62 | 542.31 | 1,082.63 | 541.82 | <b>10</b> |
| 5  | <b>622.31</b> | <b>311.66</b> | 604.30        | 302.65        | <b>G</b> | <b>1,003.59</b> | 502.30 | 986.56   | 493.79 | 985.58   | 493.29 | <b>9</b>  |
| 6  | 735.39        | 368.20        | 717.38        | 359.19        | <b>L</b> | <b>946.57</b>   | 473.79 | 929.54   | 465.27 | 928.56   | 464.78 | <b>8</b>  |
| 7  | 822.42        | <b>411.71</b> | <b>804.41</b> | <b>402.71</b> | <b>S</b> | <b>833.48</b>   | 417.25 | 816.46   | 408.73 | 815.47   | 408.24 | <b>7</b>  |
| 8  | 935.51        | <b>468.26</b> | 917.50        | 459.25        | <b>I</b> | <b>746.45</b>   | 373.73 | 729.43   | 365.22 | 728.44   | 364.72 | <b>6</b>  |
| 9  | 992.53        | 496.77        | 974.52        | 487.76        | <b>G</b> | <b>633.37</b>   | 317.19 | 616.34   | 308.67 | 615.36   | 308.18 | <b>5</b>  |
| 10 | 1,107.56      | 554.28        | 1,089.54      | 545.28        | <b>D</b> | 576.35          | 288.68 | 559.32   | 280.16 | 558.34   | 279.67 | <b>4</b>  |
| 11 | 1,206.62      | 603.82        | 1,188.61      | 594.81        | <b>V</b> | <b>461.32</b>   | 231.16 | 444.29   | 222.65 |          |        | <b>3</b>  |
| 12 | 1,277.66      | 639.33        | 1,259.65      | 630.33        | <b>A</b> | <b>362.25</b>   | 181.63 | 345.23   | 173.12 |          |        | <b>2</b>  |
| 13 |               |               |               |               | <b>K</b> | <b>291.21</b>   | 146.11 | 274.19   | 137.60 |          |        | <b>1</b>  |

MS/MS Fragmentation of **IAALNASSTIEDDHEGSFK**

Found in **Q9Y6J0**, Calcineurin-binding protein Cabin 1 - Homo sapiens (Human)

Match to Query 85508: 2292.211from(765.0775,3+)

Title: File: 080430AP4iTRAQ\_39\_01.wiff, Sample: Sample (sample number 1), Elution: 34.373 min, Period: 1, Cycle(s): 1490 (Experiment 3)

Data File:iTRAQ\_080430\_combined Search

**Monoisotopic mass of neutral peptide Mr(calc): 2292.211**

**Variable modifications:**

**K19** :iTRAQ4plex (K)

**Ions Score: 51.37 Expect: 0.005**

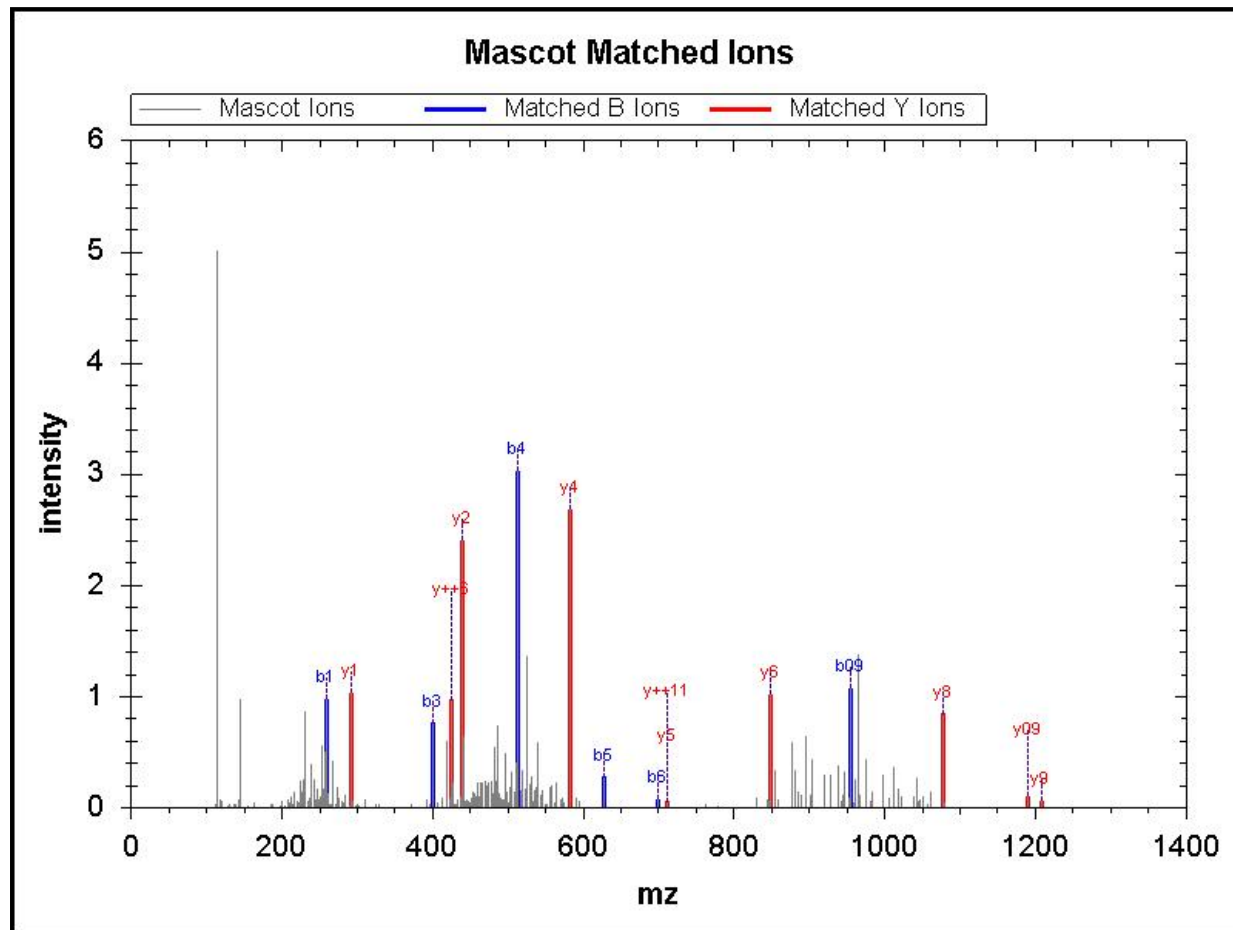

| No | b             | b++      | b*       | b*++   | b0            | b0++   | Seq | y               | y++           | y*       | y*++     | y0              | y0++     | RevNo |
|----|---------------|----------|----------|--------|---------------|--------|-----|-----------------|---------------|----------|----------|-----------------|----------|-------|
| 1  | <b>258.19</b> | 129.60   |          |        |               |        | I   |                 |               |          |          |                 |          | 19    |
| 2  | 329.23        | 165.12   |          |        |               |        | A   | 2,035.97        | 1,018.49      | 2,018.94 | 1,009.97 | 2,017.96        | 1,009.48 | 18    |
| 3  | <b>400.27</b> | 200.64   |          |        |               |        | A   | 1,964.93        | 982.97        | 1,947.91 | 974.46   | 1,946.92        | 973.96   | 17    |
| 4  | <b>513.35</b> | 257.18   |          |        |               |        | L   | 1,893.89        | 947.45        | 1,876.87 | 938.94   | 1,875.88        | 938.45   | 16    |
| 5  | <b>627.39</b> | 314.20   | 610.37   | 305.69 |               |        | N   | 1,780.81        | 890.91        | 1,763.78 | 882.40   | 1,762.80        | 881.90   | 15    |
| 6  | <b>698.43</b> | 349.72   | 681.41   | 341.21 |               |        | A   | 1,666.77        | 833.89        | 1,649.74 | 825.37   | 1,648.76        | 824.88   | 14    |
| 7  | 785.46        | 393.24   | 768.44   | 384.72 | 767.45        | 384.23 | S   | 1,595.73        | 798.37        | 1,578.70 | 789.86   | 1,577.72        | 789.36   | 13    |
| 8  | 872.50        | 436.75   | 855.47   | 428.24 | 854.49        | 427.75 | S   | 1,508.70        | 754.85        | 1,491.67 | 746.34   | 1,490.69        | 745.85   | 12    |
| 9  | 973.54        | 487.28   | 956.52   | 478.76 | <b>955.53</b> | 478.27 | T   | 1,421.67        | <b>711.34</b> | 1,404.64 | 702.82   | 1,403.66        | 702.33   | 11    |
| 10 | 1,086.63      | 543.82   | 1,069.60 | 535.30 | 1,068.62      | 534.81 | I   | 1,320.62        | 660.81        | 1,303.59 | 652.30   | 1,302.61        | 651.81   | 10    |
| 11 | 1,215.67      | 608.34   | 1,198.64 | 599.83 | 1,197.66      | 599.33 | E   | <b>1,207.53</b> | 604.27        | 1,190.51 | 595.76   | <b>1,189.52</b> | 595.27   | 9     |
| 12 | 1,330.70      | 665.85   | 1,313.67 | 657.34 | 1,312.69      | 656.85 | D   | <b>1,078.49</b> | 539.75        | 1,061.47 | 531.24   | 1,060.48        | 530.74   | 8     |
| 13 | 1,445.72      | 723.37   | 1,428.70 | 714.85 | 1,427.71      | 714.36 | D   | 963.47          | 482.24        | 946.44   | 473.72   | 945.45          | 473.23   | 7     |
| 14 | 1,582.78      | 791.90   | 1,565.76 | 783.38 | 1,564.77      | 782.89 | H   | <b>848.44</b>   | <b>424.72</b> | 831.41   | 416.21   | 830.43          | 415.72   | 6     |
| 15 | 1,711.83      | 856.42   | 1,694.80 | 847.90 | 1,693.82      | 847.41 | E   | <b>711.38</b>   | 356.19        | 694.35   | 347.68   | 693.37          | 347.19   | 5     |
| 16 | 1,768.85      | 884.93   | 1,751.82 | 876.41 | 1,750.84      | 875.92 | G   | <b>582.34</b>   | 291.67        | 565.31   | 283.16   | 564.33          | 282.67   | 4     |
| 17 | 1,855.88      | 928.44   | 1,838.85 | 919.93 | 1,837.87      | 919.44 | S   | 525.32          | 263.16        | 508.29   | 254.65   | 507.30          | 254.16   | 3     |
| 18 | 2,002.95      | 1,001.98 | 1,985.92 | 993.46 | 1,984.94      | 992.97 | F   | <b>438.28</b>   | 219.65        | 421.26   | 211.13   |                 |          | 2     |
| 19 |               |          |          |        |               |        | K   | <b>291.21</b>   | 146.11        | 274.19   | 137.60   |                 |          | 1     |

MS/MS Fragmentation of **KMSRTEQMISIQK**

Found in **Q8N5V2**, Ephexin-1 - Homo sapiens (Human)

Match to Query 60397: 1740.046from(581.0227,3+)

Title: File: 080430AP4iTRAQ\_4243\_01.wiff, Sample: Sample (sample number 1), Elution: 58.294 min, Period: 1, Cycle(s): 2364 (Experiment 4)

Data File:iTRAQ\_080430\_combined Search

**Monoisotopic mass of neutral peptide Mr(calc): 1740.046**

**Variable modifications:**

**M8** :Oxidation (M), with neutral losses 63.99828

**Q12** :Deamidated (NQ)

**K13** :iTRAQ4plex (K)

**Ions Score: 40.5 Expect: 0.049**

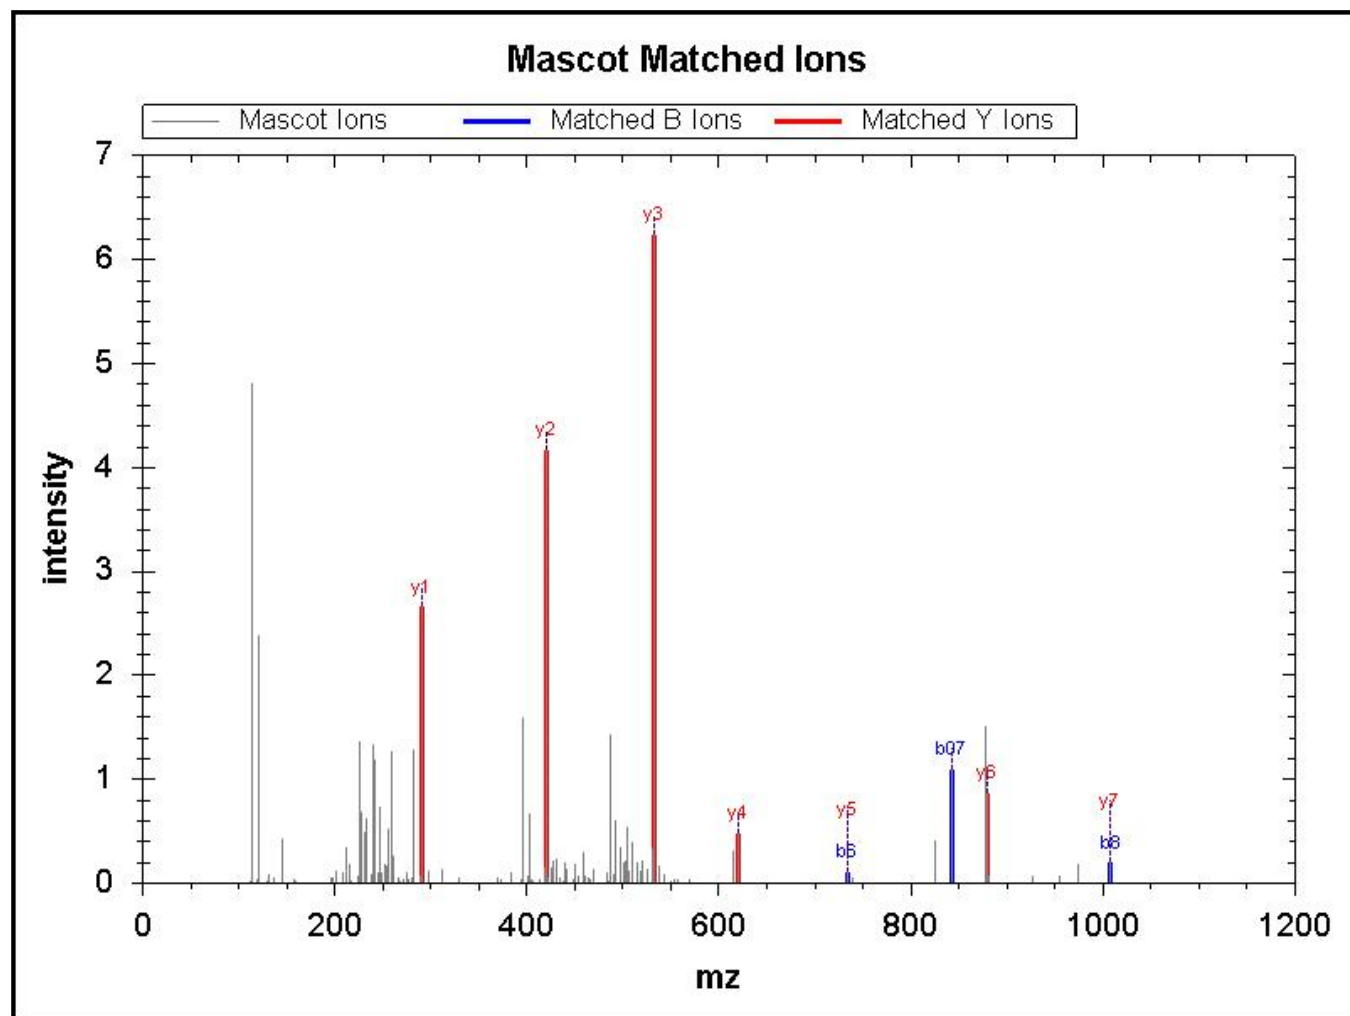

| No | b               | b++    | b*       | b*++   | b0            | b0++   | Seq      | y               | y++    | y*       | y*++   | y0       | y0++   | RevNo     |
|----|-----------------|--------|----------|--------|---------------|--------|----------|-----------------|--------|----------|--------|----------|--------|-----------|
| 1  | 129.10          | 65.05  | 112.08   | 56.54  |               |        | <b>K</b> |                 |        |          |        |          |        | <b>13</b> |
| 2  | 260.14          | 130.57 | 243.12   | 122.06 |               |        | <b>M</b> | 1,612.82        | 806.91 | 1,595.79 | 798.40 | 1,594.80 | 797.91 | <b>12</b> |
| 3  | 347.17          | 174.09 | 330.15   | 165.58 | 329.16        | 165.09 | <b>S</b> | 1,481.77        | 741.39 | 1,464.75 | 732.88 | 1,463.76 | 732.39 | <b>11</b> |
| 4  | 503.28          | 252.14 | 486.25   | 243.63 | 485.27        | 243.14 | <b>R</b> | 1,394.74        | 697.88 | 1,377.72 | 689.36 | 1,376.73 | 688.87 | <b>10</b> |
| 5  | 604.32          | 302.67 | 587.30   | 294.15 | 586.31        | 293.66 | <b>T</b> | 1,238.64        | 619.82 | 1,221.62 | 611.31 | 1,220.63 | 610.82 | <b>9</b>  |
| 6  | <b>733.37</b>   | 367.19 | 716.34   | 358.67 | 715.36        | 358.18 | <b>E</b> | 1,137.59        | 569.30 | 1,120.57 | 560.79 | 1,119.58 | 560.30 | <b>8</b>  |
| 7  | 861.42          | 431.22 | 844.40   | 422.70 | <b>843.41</b> | 422.21 | <b>Q</b> | <b>1,008.55</b> | 504.78 | 991.53   | 496.27 | 990.54   | 495.77 | <b>7</b>  |
| 8  | <b>1,008.46</b> | 504.73 | 991.43   | 496.22 | 990.45        | 495.73 | <b>M</b> | <b>880.49</b>   | 440.75 | 863.47   | 432.24 | 862.48   | 431.74 | <b>6</b>  |
| 9  | 1,121.54        | 561.28 | 1,104.52 | 552.76 | 1,103.53      | 552.27 | <b>I</b> | <b>733.46</b>   | 367.23 | 716.43   | 358.72 | 715.45   | 358.23 | <b>5</b>  |
| 10 | 1,208.58        | 604.79 | 1,191.55 | 596.28 | 1,190.57      | 595.79 | <b>S</b> | <b>620.37</b>   | 310.69 | 603.35   | 302.18 | 602.36   | 301.69 | <b>4</b>  |
| 11 | 1,321.66        | 661.33 | 1,304.63 | 652.82 | 1,303.65      | 652.33 | <b>I</b> | <b>533.34</b>   | 267.17 | 516.31   | 258.66 |          |        | <b>3</b>  |
| 12 | 1,450.70        | 725.86 | 1,433.68 | 717.34 | 1,432.69      | 716.85 | <b>Q</b> | <b>420.26</b>   | 210.63 | 403.23   | 202.12 |          |        | <b>2</b>  |
| 13 |                 |        |          |        |               |        | <b>K</b> | <b>291.21</b>   | 146.11 | 274.19   | 137.60 |          |        | <b>1</b>  |



MS/MS Fragmentation of **LKPPVSEGVK**

Found in **Q8IVL0**, Neuron navigator 3 - Homo sapiens (Human)

Match to Query 20476: 1196.763from(599.3889,2+)

Title: File: 080430AP4iTRAQ\_37\_02.wiff, Sample: Sample (sample number 1), Elution: 21.692 min, Period: 1, Cycle(s): 1264 (Experiment 2)

Data File:iTRAQ\_080430\_combined Search

**Monoisotopic mass of neutral peptide Mr(calc): 1196.763**

**Variable modifications:**

**K10** :iTRAQ4plex (K)

**Ions Score: 40.38 Expect: 0.034**

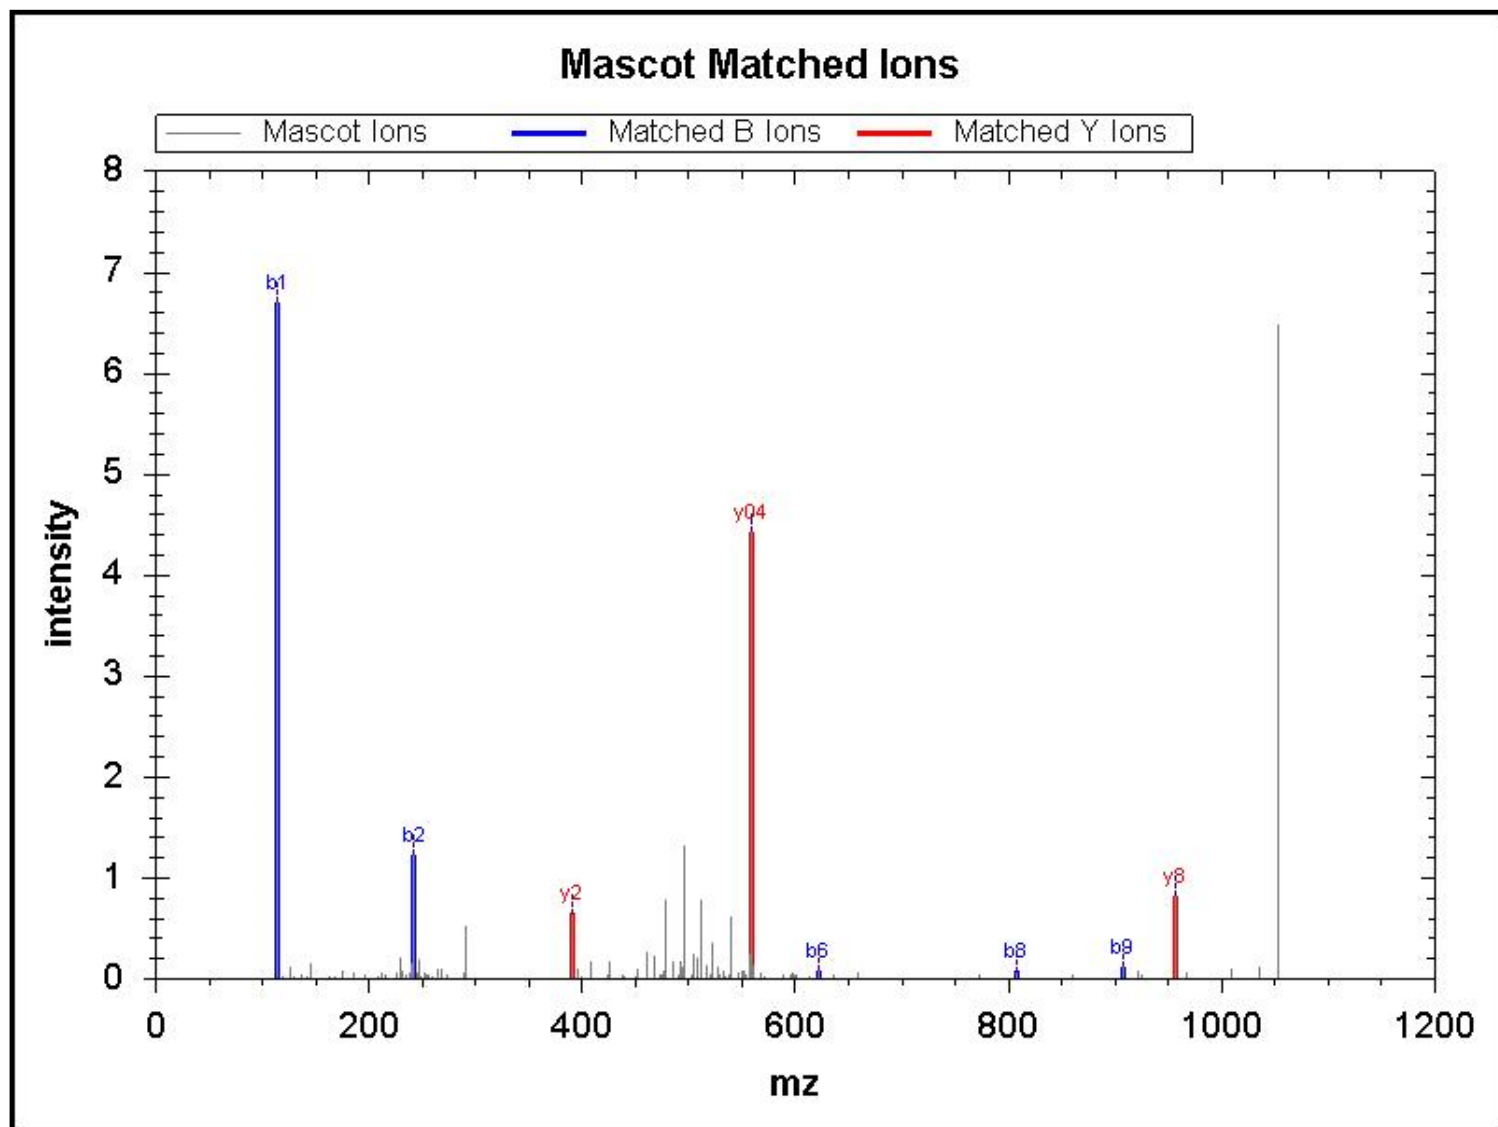

| No | b             | b++    | b*     | b*++   | b0     | b0++   | Seq | y             | y++    | y*       | y*++   | y0            | y0++   | RevNo |
|----|---------------|--------|--------|--------|--------|--------|-----|---------------|--------|----------|--------|---------------|--------|-------|
| 1  | <b>114.09</b> | 57.55  |        |        |        |        | L   |               |        |          |        |               |        | 10    |
| 2  | <b>242.19</b> | 121.60 | 225.16 | 113.08 |        |        | K   | 1,084.65      | 542.83 | 1,067.62 | 534.31 | 1,066.64      | 533.82 | 9     |
| 3  | 339.24        | 170.12 | 322.21 | 161.61 |        |        | P   | <b>956.55</b> | 478.78 | 939.53   | 470.27 | 938.54        | 469.77 | 8     |
| 4  | 436.29        | 218.65 | 419.27 | 210.14 |        |        | P   | 859.50        | 430.25 | 842.47   | 421.74 | 841.49        | 421.25 | 7     |
| 5  | 535.36        | 268.18 | 518.33 | 259.67 |        |        | V   | 762.45        | 381.73 | 745.42   | 373.21 | 744.44        | 372.72 | 6     |
| 6  | <b>622.39</b> | 311.70 | 605.37 | 303.19 | 604.38 | 302.69 | S   | 663.38        | 332.19 | 646.35   | 323.68 | 645.37        | 323.19 | 5     |
| 7  | 751.43        | 376.22 | 734.41 | 367.71 | 733.42 | 367.22 | E   | 576.35        | 288.68 | 559.32   | 280.16 | <b>558.34</b> | 279.67 | 4     |
| 8  | <b>808.46</b> | 404.73 | 791.43 | 396.22 | 790.45 | 395.73 | G   | 447.30        | 224.16 | 430.28   | 215.64 |               |        | 3     |
| 9  | <b>907.52</b> | 454.27 | 890.50 | 445.75 | 889.51 | 445.26 | V   | <b>390.28</b> | 195.65 | 373.26   | 187.13 |               |        | 2     |
| 10 |               |        |        |        |        |        | K   | 291.21        | 146.11 | 274.19   | 137.60 |               |        | 1     |

MS/MS Fragmentation of **VNIAFNYPEDSDTYLHR**

Found in **Q13838**, Spliceosome RNA helicase BAT1 - Homo sapiens (Human)

Match to Query 89482: 2443.24from(815.4205,3+)

Title: File: 080430AP4iTRAQ\_36\_02.wiff, Sample: Sample (sample number 1), Elution: 48.602 min, Period: 1, Cycle(s): 3240 (Experiment 2)

Data File:iTRAQ\_080430\_combined Search

**Monoisotopic mass of neutral peptide Mr(calc): 2443.24**

**Variable modifications:**

**Ions Score: 57.4 Expect: 0.001**

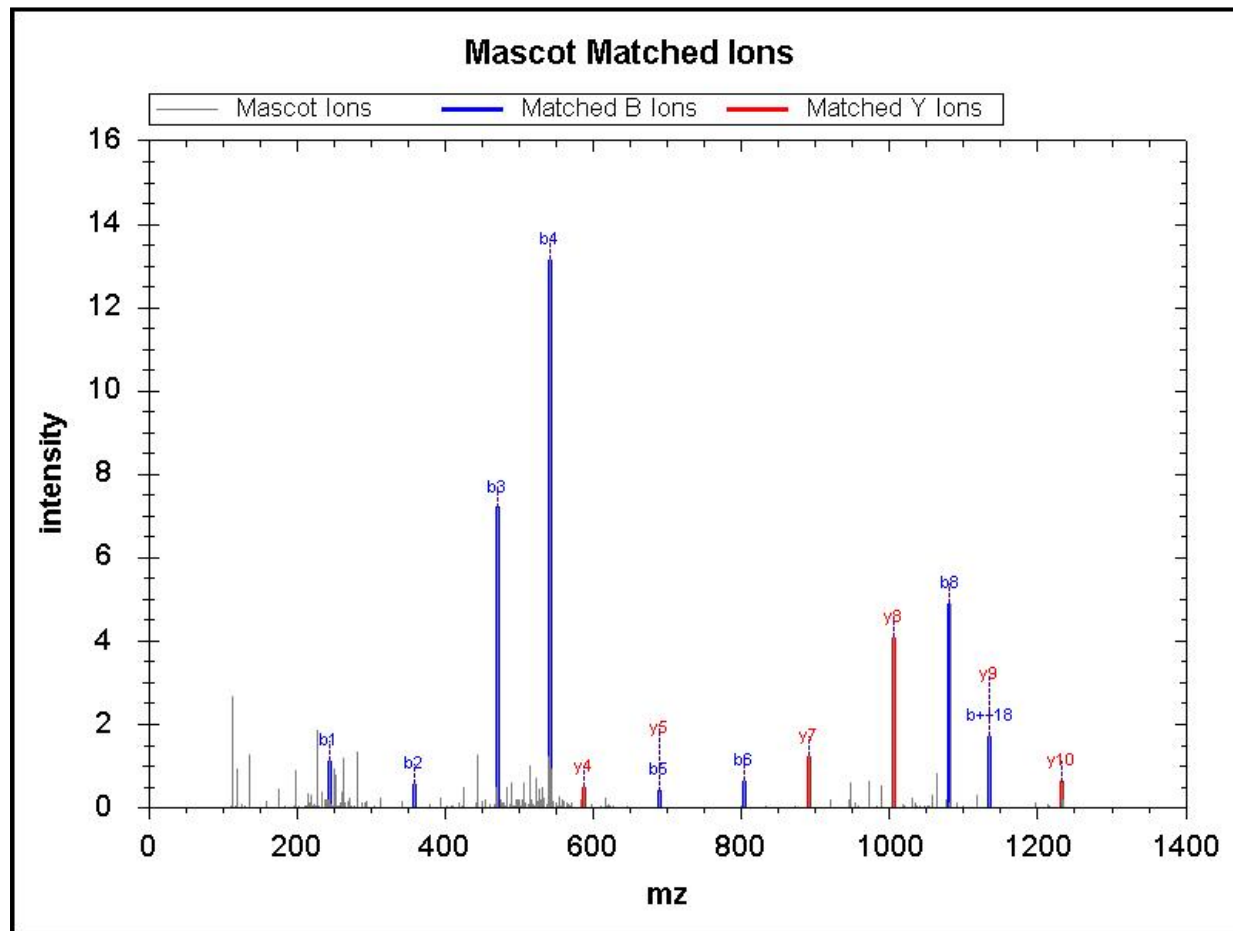

| No | b               | b++             | b*       | b*++     | b0       | b0++     | Seq | y               | y++      | y*       | y*++     | y0       | y0++     | RevNo |
|----|-----------------|-----------------|----------|----------|----------|----------|-----|-----------------|----------|----------|----------|----------|----------|-------|
| 1  | <b>244.18</b>   | 122.59          |          |          |          |          | V   |                 |          |          |          |          |          | 19    |
| 2  | <b>358.22</b>   | 179.61          | 341.19   | 171.10   |          |          | N   | 2,200.96        | 1,100.98 | 2,183.93 | 1,092.47 | 2,182.95 | 1,091.98 | 18    |
| 3  | <b>471.30</b>   | 236.16          | 454.28   | 227.64   |          |          | I   | 2,086.92        | 1,043.96 | 2,069.89 | 1,035.45 | 2,068.91 | 1,034.96 | 17    |
| 4  | <b>542.34</b>   | 271.67          | 525.32   | 263.16   |          |          | A   | 1,973.83        | 987.42   | 1,956.81 | 978.91   | 1,955.82 | 978.42   | 16    |
| 5  | <b>689.41</b>   | 345.21          | 672.38   | 336.70   |          |          | F   | 1,902.80        | 951.90   | 1,885.77 | 943.39   | 1,884.79 | 942.90   | 15    |
| 6  | <b>803.45</b>   | 402.23          | 786.43   | 393.72   |          |          | N   | 1,755.73        | 878.37   | 1,738.70 | 869.85   | 1,737.72 | 869.36   | 14    |
| 7  | 966.52          | 483.76          | 949.49   | 475.25   |          |          | Y   | 1,641.68        | 821.35   | 1,624.66 | 812.83   | 1,623.67 | 812.34   | 13    |
| 8  | <b>1,081.54</b> | 541.28          | 1,064.52 | 532.76   | 1,063.53 | 532.27   | D   | 1,478.62        | 739.81   | 1,461.60 | 731.30   | 1,460.61 | 730.81   | 12    |
| 9  | 1,212.58        | 606.80          | 1,195.56 | 598.28   | 1,194.57 | 597.79   | M   | 1,363.59        | 682.30   | 1,346.57 | 673.79   | 1,345.58 | 673.30   | 11    |
| 10 | 1,309.64        | 655.32          | 1,292.61 | 646.81   | 1,291.63 | 646.32   | P   | <b>1,232.55</b> | 616.78   | 1,215.53 | 608.27   | 1,214.54 | 607.78   | 10    |
| 11 | 1,438.68        | 719.84          | 1,421.65 | 711.33   | 1,420.67 | 710.84   | E   | <b>1,135.50</b> | 568.25   | 1,118.47 | 559.74   | 1,117.49 | 559.25   | 9     |
| 12 | 1,553.71        | 777.36          | 1,536.68 | 768.84   | 1,535.70 | 768.35   | D   | <b>1,006.46</b> | 503.73   | 989.43   | 495.22   | 988.45   | 494.73   | 8     |
| 13 | 1,640.74        | 820.87          | 1,623.71 | 812.36   | 1,622.73 | 811.87   | S   | <b>891.43</b>   | 446.22   | 874.41   | 437.71   | 873.42   | 437.21   | 7     |
| 14 | 1,755.77        | 878.39          | 1,738.74 | 869.87   | 1,737.75 | 869.38   | D   | 804.40          | 402.70   | 787.37   | 394.19   | 786.39   | 393.70   | 6     |
| 15 | 1,856.81        | 928.91          | 1,839.79 | 920.40   | 1,838.80 | 919.90   | T   | <b>689.37</b>   | 345.19   | 672.35   | 336.68   | 671.36   | 336.18   | 5     |
| 16 | 2,019.88        | 1,010.44        | 2,002.85 | 1,001.93 | 2,001.87 | 1,001.44 | Y   | <b>588.33</b>   | 294.67   | 571.30   | 286.15   |          |          | 4     |
| 17 | 2,132.96        | 1,066.98        | 2,115.93 | 1,058.47 | 2,114.95 | 1,057.98 | L   | 425.26          | 213.13   | 408.24   | 204.62   |          |          | 3     |
| 18 | 2,270.02        | <b>1,135.51</b> | 2,252.99 | 1,127.00 | 2,252.01 | 1,126.51 | H   | 312.18          | 156.59   | 295.15   | 148.08   |          |          | 2     |
| 19 |                 |                 |          |          |          |          | R   | 175.12          | 88.06    | 158.09   | 79.55    |          |          | 1     |

MS/MS Fragmentation of **YVATLGVEVHPLVFHTNR**

Found in **P62826**, GTP-binding nuclear protein Ran - Homo sapiens (Human)

Match to Query 82251: 2195.291from(549.83,4+)

Title: File: 080430AP4iTRAQ\_4849\_02.wiff, Sample: Sample (sample number 1), Elution: 54.639 min, Period: 1, Cycle(s): 2390 (Experiment 2)

Data File:iTRAQ\_080430\_combined Search

**Monoisotopic mass of neutral peptide Mr(calc):** 2195.291

**Variable modifications:**

**Ions Score:** 45.32 **Expect:** 0.019

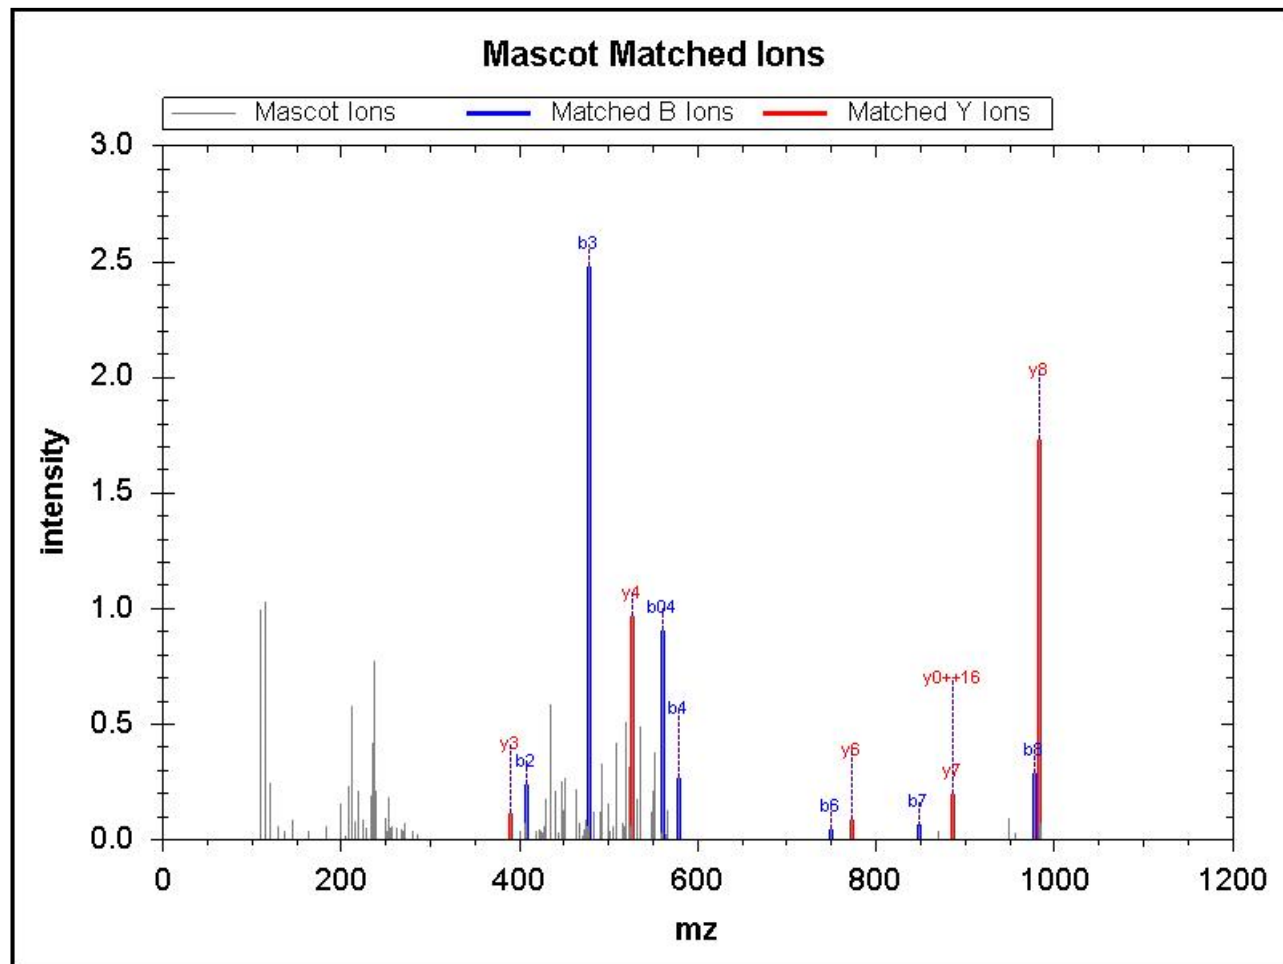

| No | b        | b++      | b*       | b*++     | b0       | b0++     | Seq | y        | y++    | y*       | y*++   | y0       | y0++   | RevNo |
|----|----------|----------|----------|----------|----------|----------|-----|----------|--------|----------|--------|----------|--------|-------|
| 1  | 308.17   | 154.59   |          |          |          |          | Y   |          |        |          |        |          |        | 18    |
| 2  | 407.24   | 204.12   |          |          |          |          | V   | 1,889.04 | 945.02 | 1,872.01 | 936.51 | 1,871.03 | 936.02 | 17    |
| 3  | 478.28   | 239.64   |          |          |          |          | A   | 1,789.97 | 895.49 | 1,772.94 | 886.98 | 1,771.96 | 886.48 | 16    |
| 4  | 579.33   | 290.17   |          |          | 561.32   | 281.16   | T   | 1,718.93 | 859.97 | 1,701.91 | 851.46 | 1,700.92 | 850.97 | 15    |
| 5  | 692.41   | 346.71   |          |          | 674.40   | 337.70   | L   | 1,617.89 | 809.45 | 1,600.86 | 800.93 | 1,599.88 | 800.44 | 14    |
| 6  | 749.43   | 375.22   |          |          | 731.42   | 366.21   | G   | 1,504.80 | 752.90 | 1,487.78 | 744.39 | 1,486.79 | 743.90 | 13    |
| 7  | 848.50   | 424.75   |          |          | 830.49   | 415.75   | V   | 1,447.78 | 724.39 | 1,430.75 | 715.88 | 1,429.77 | 715.39 | 12    |
| 8  | 977.54   | 489.27   |          |          | 959.53   | 480.27   | E   | 1,348.71 | 674.86 | 1,331.69 | 666.35 | 1,330.70 | 665.85 | 11    |
| 9  | 1,076.61 | 538.81   |          |          | 1,058.60 | 529.80   | V   | 1,219.67 | 610.34 | 1,202.64 | 601.83 | 1,201.66 | 601.33 | 10    |
| 10 | 1,213.67 | 607.34   |          |          | 1,195.66 | 598.33   | H   | 1,120.60 | 560.80 | 1,103.57 | 552.29 | 1,102.59 | 551.80 | 9     |
| 11 | 1,310.72 | 655.86   |          |          | 1,292.71 | 646.86   | P   | 983.54   | 492.27 | 966.52   | 483.76 | 965.53   | 483.27 | 8     |
| 12 | 1,423.81 | 712.41   |          |          | 1,405.80 | 703.40   | L   | 886.49   | 443.75 | 869.46   | 435.24 | 868.48   | 434.74 | 7     |
| 13 | 1,522.88 | 761.94   |          |          | 1,504.86 | 752.94   | V   | 773.41   | 387.21 | 756.38   | 378.69 | 755.39   | 378.20 | 6     |
| 14 | 1,669.94 | 835.48   |          |          | 1,651.93 | 826.47   | F   | 674.34   | 337.67 | 657.31   | 329.16 | 656.33   | 328.67 | 5     |
| 15 | 1,807.00 | 904.00   |          |          | 1,788.99 | 895.00   | H   | 527.27   | 264.14 | 510.24   | 255.62 | 509.26   | 255.13 | 4     |
| 16 | 1,908.05 | 954.53   |          |          | 1,890.04 | 945.52   | T   | 390.21   | 195.61 | 373.18   | 187.10 | 372.20   | 186.60 | 3     |
| 17 | 2,022.09 | 1,011.55 | 2,005.07 | 1,003.04 | 2,004.08 | 1,002.54 | N   | 289.16   | 145.08 | 272.14   | 136.57 |          |        | 2     |
| 18 |          |          |          |          |          |          | R   | 175.12   | 88.06  | 158.09   | 79.55  |          |        | 1     |

MS/MS Fragmentation of **TKTENSGEALAK**

Found in **Q9P016**, Thymocyte nuclear protein 1 - Homo sapiens (Human)

Match to Query 56952: 1679.97from(560.9972,3+)

Title: File: 080430AP4iTRAQ\_4647\_01.wiff, Sample: Sample (sample number 1), Elution: 23.097 min, Period: 1, Cycle(s): 1612 (Experiment 3)

Data File:iTRAQ\_080430\_combined Search

**Monoisotopic mass of neutral peptide Mr(calc): 1679.97**

**Variable modifications:**

**K2** :iTRAQ4plex (K)

**K12** :iTRAQ4plex (K)

**Ions Score: 41.8 Expect: 0.036**

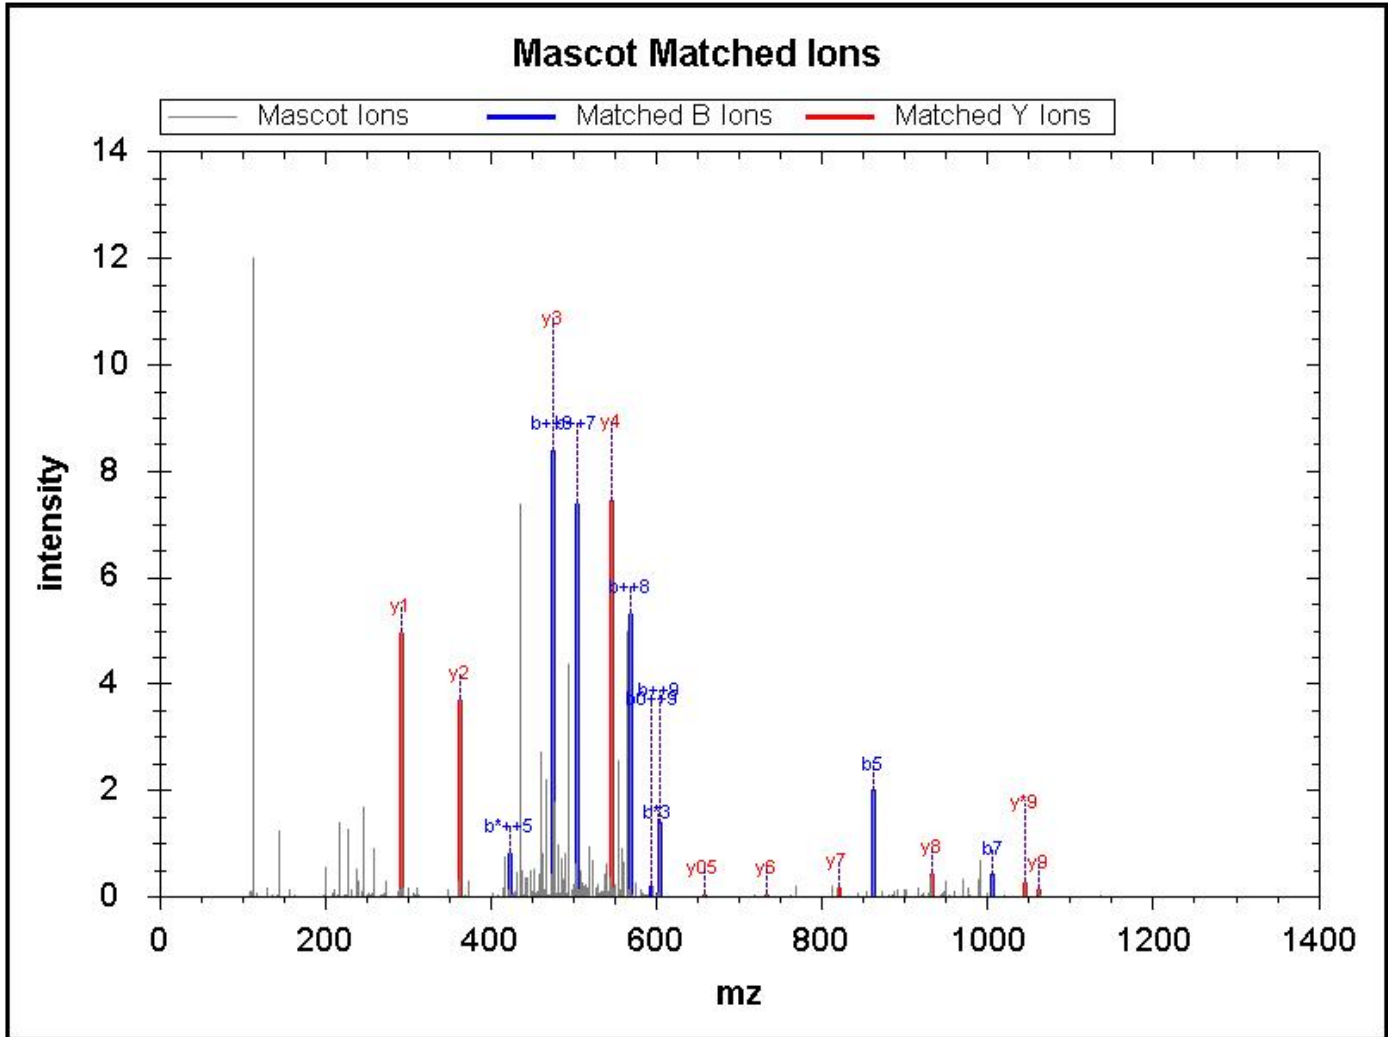

| No | b               | b++           | b*            | b*++          | b0       | b0++          | Seq | y               | y++    | y*              | y*++   | y0            | y0++   | RevNo |
|----|-----------------|---------------|---------------|---------------|----------|---------------|-----|-----------------|--------|-----------------|--------|---------------|--------|-------|
| 1  | 246.16          | 123.58        |               |               | 228.15   | 114.58        | T   |                 |        |                 |        |               |        | 12    |
| 2  | 518.35          | 259.68        | 501.33        | 251.17        | 500.34   | 250.68        | K   | 1,435.80        | 718.40 | 1,418.77        | 709.89 | 1,417.79      | 709.40 | 11    |
| 3  | 619.40          | 310.20        | <b>602.38</b> | 301.69        | 601.39   | 301.20        | T   | 1,163.60        | 582.30 | 1,146.58        | 573.79 | 1,145.59      | 573.30 | 10    |
| 4  | 748.44          | 374.73        | 731.42        | 366.21        | 730.43   | 365.72        | E   | <b>1,062.55</b> | 531.78 | <b>1,045.53</b> | 523.27 | 1,044.54      | 522.78 | 9     |
| 5  | <b>862.49</b>   | 431.75        | 845.46        | <b>423.23</b> | 844.48   | 422.74        | N   | <b>933.51</b>   | 467.26 | 916.49          | 458.75 | 915.50        | 458.25 | 8     |
| 6  | 949.52          | <b>475.26</b> | 932.49        | 466.75        | 931.51   | 466.26        | S   | <b>819.47</b>   | 410.24 | 802.44          | 401.72 | 801.46        | 401.23 | 7     |
| 7  | <b>1,006.54</b> | <b>503.77</b> | 989.51        | 495.26        | 988.53   | 494.77        | G   | <b>732.44</b>   | 366.72 | 715.41          | 358.21 | 714.43        | 357.72 | 6     |
| 8  | 1,135.58        | <b>568.30</b> | 1,118.56      | 559.78        | 1,117.57 | 559.29        | E   | 675.42          | 338.21 | 658.39          | 329.70 | <b>657.41</b> | 329.21 | 5     |
| 9  | 1,206.62        | <b>603.81</b> | 1,189.59      | 595.30        | 1,188.61 | <b>594.81</b> | A   | <b>546.37</b>   | 273.69 | 529.35          | 265.18 |               |        | 4     |
| 10 | 1,319.70        | 660.36        | 1,302.68      | 651.84        | 1,301.69 | 651.35        | L   | <b>475.34</b>   | 238.17 | 458.31          | 229.66 |               |        | 3     |
| 11 | 1,390.74        | 695.87        | 1,373.72      | 687.36        | 1,372.73 | 686.87        | A   | <b>362.25</b>   | 181.63 | 345.23          | 173.12 |               |        | 2     |
| 12 |                 |               |               |               |          |               | K   | <b>291.21</b>   | 146.11 | 274.19          | 137.60 |               |        | 1     |

MS/MS Fragmentation of **LISLPLSR**

Found in **Q9NRG0**, Chromatin accessibility complex protein 1 - Homo sapiens (Human)

Match to Query 10073: 1041.688from(521.8515,2+)

Title: File: 080430AP4iTRAQ\_27\_01.wiff, Sample: Ku (sample number 1), Elution: 43.939 min, Period: 1, Cycle(s): 1577 (Experiment 3)

Data File:iTRAQ\_080430\_combined Search

**Monoisotopic mass of neutral peptide Mr(calc): 1041.688**

**Variable modifications:**

**Ions Score: 47.04 Expect: 0.006**

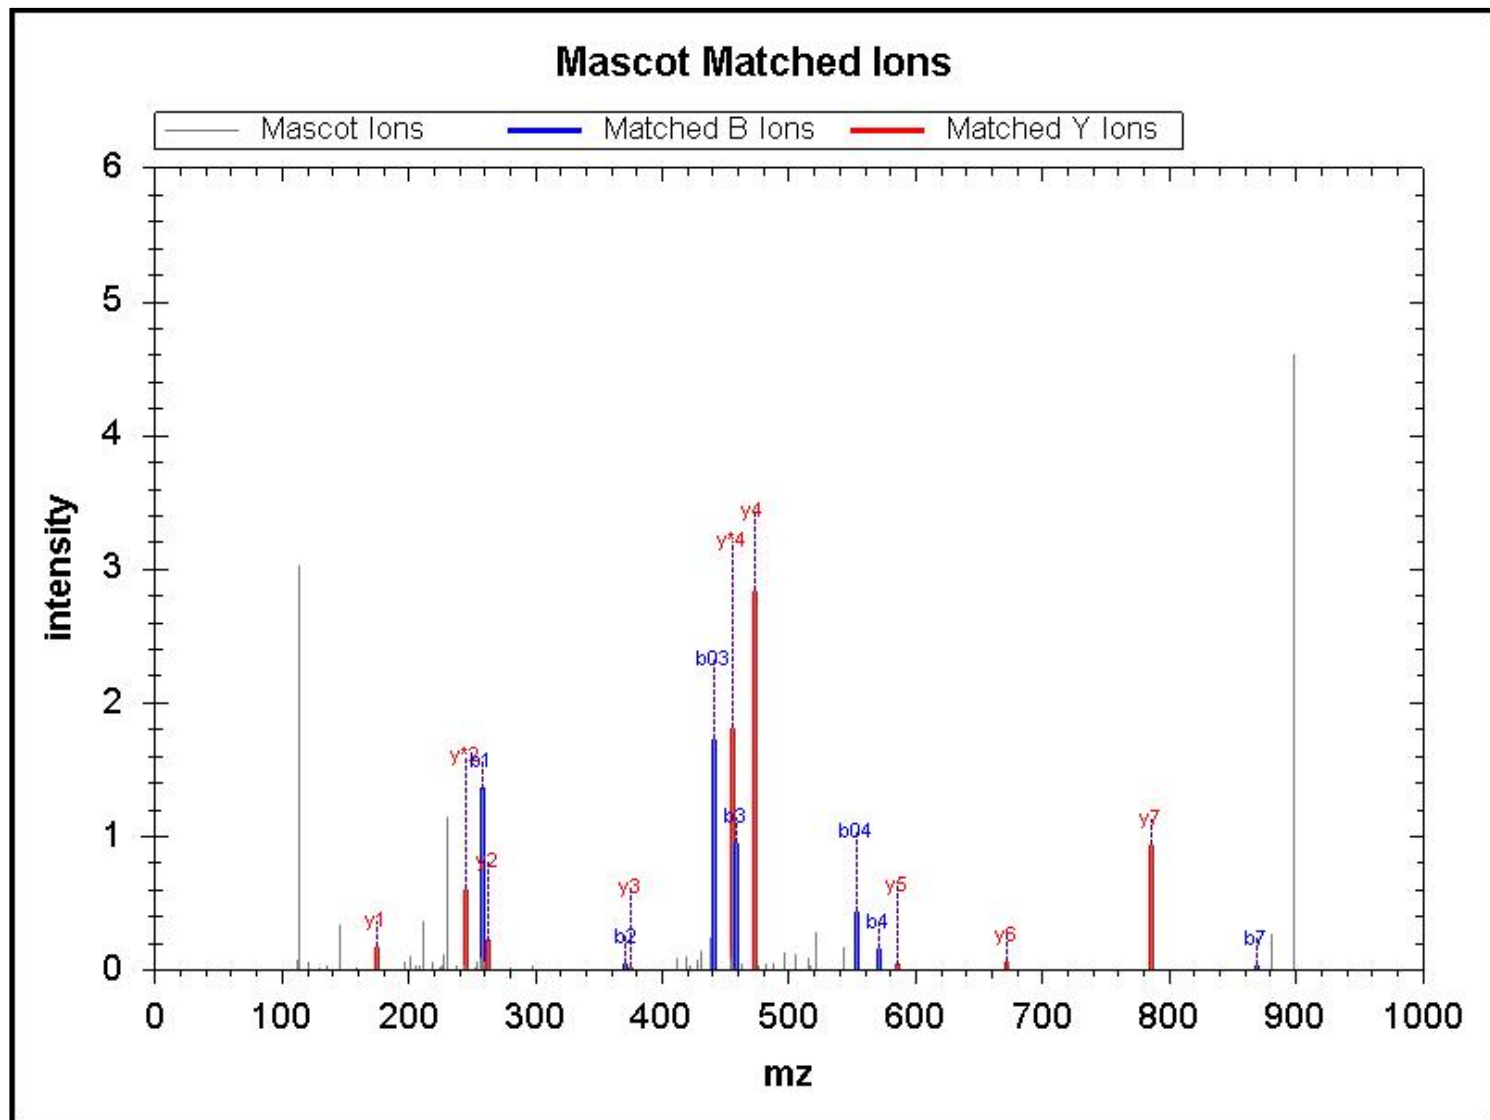

| No | b      | b++    | b0     | b0++   | Seq | y      | y++    | y*     | y*++   | y0     | y0++   | RevNo |
|----|--------|--------|--------|--------|-----|--------|--------|--------|--------|--------|--------|-------|
| 1  | 258.19 | 129.60 |        |        | L   |        |        |        |        |        |        | 8     |
| 2  | 371.28 | 186.14 |        |        | I   | 785.49 | 393.25 | 768.46 | 384.73 | 767.48 | 384.24 | 7     |
| 3  | 458.31 | 229.66 | 440.30 | 220.65 | S   | 672.40 | 336.71 | 655.38 | 328.19 | 654.39 | 327.70 | 6     |
| 4  | 571.39 | 286.20 | 553.38 | 277.20 | L   | 585.37 | 293.19 | 568.35 | 284.68 | 567.36 | 284.18 | 5     |
| 5  | 668.45 | 334.73 | 650.44 | 325.72 | P   | 472.29 | 236.65 | 455.26 | 228.13 | 454.28 | 227.64 | 4     |
| 6  | 781.53 | 391.27 | 763.52 | 382.26 | L   | 375.24 | 188.12 | 358.21 | 179.61 | 357.22 | 179.12 | 3     |
| 7  | 868.56 | 434.78 | 850.55 | 425.78 | S   | 262.15 | 131.58 | 245.12 | 123.07 | 244.14 | 122.57 | 2     |
| 8  |        |        |        |        | R   | 175.12 | 88.06  | 158.09 | 79.55  |        |        | 1     |
